# Supplementary material
Source: publisher figshare collection journal article supplement (https://acs.figshare.com/ndownloader/files/3618825)
Supplement: Supplementary file 1 [file 3618825]

## Sheet: mg_geom
Supporting Information for
Parameterization of DFTB3/3OB for Magnesium and Zinc for Chemical and Biological Applications
Xiya Lu, Michael Gaus, Marcus Elstner and Qiang Cui
														N = number of comparisons
Geometric properties														MAD = Mean absolute deviation
Calculated geometries (information based on xyz coordinates provided in the next sheet)														MAX = Maximal absolute deviation
(bond lengths “r” in Angstrom, angles “a” in degree)														MSE = Mean signed error
														Statistics with B3LYP/aug-cc-pVTZ being the reference								Differences to B3LYP/aug-cc-pVTZ						Absolute differences to B3LYP/aug-cc-pVTZ
						B3LYP	MP2	B3LYP	PM6	DFTB3/MIO	DFTB3/3OB					MP2	B3LYP	PM6	DFTB3/MIO	DFTB3/3OB		MP2	B3LYP	PM6	DFTB3/MIO	DFTB3/3OB		MP2	B3LYP	PM6	DFTB3/MIO	DFTB3/3OB
molecule	property	atoms involved				aug-cc-pVTZ	aug-cc-pVTZ	6-31+G(d,p)				property	type			aug-cc-pVTZ	6-31+G(d,p)					aug-cc-pVTZ	6-31+G(d,p)					aug-cc-pVTZ	6-31+G(d,p)
mg_h-1_P1	rHMg	2	1	x	x	1.657	1.657	1.664	1.69	1.662	1.62	rHMg	r	N for bond lengths	120							0	0.007	0.033	0.005	-0.037		0	0.007	0.033	0.005	0.037
mg_h-2	rHMg	1	2	x	x	1.701	1.707	1.708	1.726	1.689	1.682	rHMg	r	MAD for bond lengths		0.00870833	0.008725	0.049775	0.0170333	0.0127833		0.006	0.007	0.025	-0.012	-0.019		0.006	0.007	0.025	0.012	0.019
mg_h-2	aHMgH	1	2	3	x	180	180	180	180	180	180	aHMgH	a	MAX for bond lengths		0.051	0.024	0.284	0.141	0.072		0	0	0	0	0		0	0	0	0	0
mg_ch3-1_P1	rCMg	2	1	x	x	2.084	2.07	2.097	2.065	2.057	2.064	rCMg	r	MSE for bond lengths		0.00235833	0.00840833	-0.037525	0.00256667	-0.00246667		-0.014	0.013	-0.019	-0.027	-0.02		0.014	0.013	0.019	0.027	0.02
mg_ch3-1_P1	rCH	2	3	x	x	1.087	1.088	1.091	1.088	1.095	1.088	rCH	r									0.001	0.004	0.001	0.008	0.001		0.001	0.004	0.001	0.008	0.001
mg_ch3-1_P1	aHCMg	3	2	1	x	106.3	107.4	106.5	109.4	112	112	aHCMg	a	N for bond angles	117							1.1	0.2	3.1	5.7	5.7		1.1	0.2	3.1	5.7	5.7
mg_ch3-2	rCMg	2	1	x	x	2.095	2.103	2.103	2.086	2.094	2.098	rCMg	r	MAD for bond angles		0.892308	0.511111	3.38632	3.63761	2.89744		0.008	0.008	-0.009	-0.001	0.003		0.008	0.008	0.009	0.001	0.003
mg_ch3-2	rCH	2	3	x	x	1.094	1.093	1.098	1.08	1.091	1.084	rCH	r	MAX for bond angles		23.7	10.2	38.7	41.3	45.3		-0.001	0.004	-0.014	-0.003	-0.01		0.001	0.004	0.014	0.003	0.01
mg_ch3-2	aCMgC	2	1	4	x	180	180	180	180	180	180	aCMgC	a	MSE for bond angles		0.439316	0.0188034	2.05641	0.82735	1.88889		0	0	0	0	0		0	0	0	0	0
mg_ch3-2	aHCMg	3	2	1	x	111.8	111.9	111.8	109	113.3	113.4	aHCMg	a									0.1	0	-2.8	1.5	1.6		0.1	0	2.8	1.5	1.6
mg_cn-2	rCMg	2	1	x	x	2.029	2.043	2.04	2.029	2.039	2.034	rCMg	r	MAD of different bond types								0.014	0.011	0	0.01	0.005		0.014	0.011	0	0.01	0.005
mg_cn-2	rCN	2	4	x	x	1.156	1.179	1.167	1.15	1.147	1.154	rCN	r	rCMg	14	0.00971429	0.0124286	0.04	0.0219286	0.0128571		0.023	0.011	-0.006	-0.009	-0.002		0.023	0.011	0.006	0.009	0.002
mg_cn-2	aCMgC	2	1	3	x	180	180	180	180	180	180	aCMgC	a	rHMg	10	0.0073	0.0068	0.014	0.0074	0.0215		0	0	0	0	0		0	0	0	0	0
mg_cn-2	aMgCN	1	2	4	x	180	180	180	180	180	180	aMgCN	a	rMgN	10	0.0107	0.0142	0.032	0.0198	0.0217		0	0	0	0	0		0	0	0	0	0
mg_cn_P1	rCMg	2	1	x	x	1.971	1.98	1.986	1.999	1.988	1.983	rCMg	r	rMgO	15	0.0112667	0.0181333	0.0434	0.0339333	0.0132		0.009	0.015	0.028	0.017	0.012		0.009	0.015	0.028	0.017	0.012
mg_cn_P1	rCN	2	3	x	x	1.156	1.18	1.167	1.145	1.148	1.156	rCN	r	rMgP	6	0.00716667	0.00566667	0.0993333	0.0125	0.0265		0.024	0.011	-0.011	-0.008	0		0.024	0.011	0.011	0.008	0
mg_cn_P1	aMgCN	1	2	3	x	180	180	180	180	180	180	aMgCN	a	rMgS	12	0.01425	0.00725	0.215333	0.0314167	0.0239167		0	0	0	0	0		0	0	0	0	0
mg_co-1_P2	rCMg	2	1	x	x	2.205	2.216	2.226	2.097	2.238	2.223	rCMg	r									0.011	0.021	-0.108	0.033	0.018		0.011	0.021	0.108	0.033	0.018
mg_co-1_P2	rC#O	2	3	x	x	1.108	1.127	1.12	1.119	1.092	1.095	rC#O	r	MAX of different bond types								0.019	0.012	0.011	-0.016	-0.013		0.019	0.012	0.011	0.016	0.013
mg_co-1_P2	aMgC#O	1	2	3	x	180	180	180	180	180	180	aMgC#O	a	rCMg	14	0.015	0.021	0.108	0.141	0.045		0	0	0	0	0		0	0	0	0	0
mg_co-2_P2	rCMg	2	1	x	x	2.226	2.236	2.242	2.122	2.233	2.221	rCMg	r	rHMg	10	0.01	0.009	0.033	0.021	0.037		0.01	0.016	-0.104	0.007	-0.005		0.01	0.016	0.104	0.007	0.005
mg_co-2_P2	rC#O	2	3	x	x	1.109	1.128	1.12	1.12	1.093	1.095	rC#O	r	rMgN	10	0.015	0.022	0.057	0.068	0.045		0.019	0.011	0.011	-0.016	-0.014		0.019	0.011	0.011	0.016	0.014
mg_co-2_P2	aMgC#O	1	2	3	x	180	180	180	180	180	180	aMgC#O	a	rMgO	15	0.031	0.024	0.113	0.093	0.041		0	0	0	0	0		0	0	0	0	0
mg_co-2_P2	aCMgC	2	1	4	x	180	180	180	180	180	180	aCMgC	a	rMgP	6	0.019	0.008	0.132	0.023	0.065		0	0	0	0	0		0	0	0	0	0
mg_co-3_P2	rCMg	2	1	x	x	2.261	2.264	2.275	2.165	2.26	2.249	rCMg	r	rMgS	12	0.051	0.012	0.284	0.086	0.072		0.003	0.014	-0.096	-0.001	-0.012		0.003	0.014	0.096	0.001	0.012
mg_co-3_P2	rC#O	2	3	x	x	1.11	1.128	1.121	1.122	1.093	1.095	rC#O	r									0.018	0.011	0.012	-0.017	-0.015		0.018	0.011	0.012	0.017	0.015
mg_co-3_P2	aMgC#O	1	2	3	x	180	180	180	180	180	180	aMgC#O	a	MSE of different bond types								0	0	0	0	0		0	0	0	0	0
mg_co-3_P2	aCMgC	2	1	4	x	120	120	120	120	120.1	120	aCMgC	a	rCMg	14	0.007	0.0124286	-0.026	-0.00335714	-0.00128571		0	0	0	0.1	0		0	0	0	0.1	0
mg_co-4_P2	rCMg	2	1	x	x	2.295	2.292	2.305	2.202	2.288	2.278	rCMg	r	rHMg	10	0.0073	0.0068	0.014	-0.0064	-0.0215		-0.003	0.01	-0.093	-0.007	-0.017		0.003	0.01	0.093	0.007	0.017
mg_co-4_P2	rC#O	2	6	x	x	1.111	1.129	1.122	1.123	1.093	1.096	rC#O	r	rMgN	10	0.0033	0.0142	-0.025	0.0144	-0.0165		0.018	0.011	0.012	-0.018	-0.015		0.018	0.011	0.012	0.018	0.015
mg_co-4_P2	aMgC#O	1	2	6	x	180	180	180	180	179.9	180	aMgC#O	a	rMgO	15	0.00766667	0.0181333	-0.0395333	0.0302	-0.0076		0	0	0	-0.1	0		0	0	0	0.1	0
mg_co-4_P2	aCMgC	2	1	3	x	109.4	109.4	109.4	109.4	109.5	109.5	aCMgC	a	rMgP	6	-0.0035	0.00566667	-0.0993333	-0.00983333	0.0265		0	0	0	0.1	0.1		0	0	0	0.1	0.1
mg_cp-2	rCMg	2	1	x	x	2.35	2.348	2.364	2.409	2.209	2.305	rCMg	r	rMgS	12	-0.00975	0.00408333	-0.215333	-0.0250833	0.0115833		-0.002	0.014	0.059	-0.141	-0.045		0.002	0.014	0.059	0.141	0.045
mg_cp-2	rCH	2	12	x	x	1.079	1.08	1.083	1.072	1.098	1.084	rCH	r									0.001	0.004	-0.007	0.019	0.005		0.001	0.004	0.007	0.019	0.005
mg_cp-2	rC%C	2	4	x	x	1.418	1.422	1.425	1.428	1.462	1.421	rC%C	r									0.004	0.007	0.01	0.044	0.003		0.004	0.007	0.01	0.044	0.003
mg_ac-2	rMgO	1	2	x	x	2.014	2.031	2.029	2.034	2.077	2.001	rMgO	r									0.017	0.015	0.02	0.063	-0.013		0.017	0.015	0.02	0.063	0.013
mg_ac-2	rC%O	3	2	x	x	1.273	1.277	1.28	1.287	1.287	1.282	rC%O	r									0.004	0.007	0.014	0.014	0.009		0.004	0.007	0.014	0.014	0.009
mg_ac-2	rCC	3	4	x	x	1.5	1.497	1.504	1.478	1.488	1.501	rCC	r									-0.003	0.004	-0.022	-0.012	0.001		0.003	0.004	0.022	0.012	0.001
mg_ac-2	rCH	4	10	x	x	1.085	1.084	1.09	1.103	1.094	1.087	rCH	r									-0.001	0.005	0.018	0.009	0.002		0.001	0.005	0.018	0.009	0.002
mg_ac-2	aC%OMg	3	2	1	x	87.2	86.9	87.5	91.5	90.1	87.8	aC%OMg	a									-0.3	0.3	4.3	2.9	0.6		0.3	0.3	4.3	2.9	0.6
mg_ac-2	aOMgOp	2	1	6	x	134.5	134.5	134.7	136.1	136.2	134.3	aOMgOp	a									0	0.2	1.6	1.7	-0.2		0	0.2	1.6	1.7	0.2
mg_ac-2	aOMgO	2	1	5	x	66.2	66.1	65.9	63.8	63.5	66.6	aOMgO	a									-0.1	-0.3	-2.4	-2.7	0.4		0.1	0.3	2.4	2.7	0.4
mg_ac-2	aO%C%O	2	3	5	x	119.2	119.9	118.9	113.1	116.2	117.8	aO%C%O	a									0.7	-0.3	-6.1	-3	-1.4		0.7	0.3	6.1	3	1.4
mg_ac-2	aCC%O	4	3	2	x	120.9	120.6	121	123.4	122	121.3	aCC%O	a									-0.3	0.1	2.5	1.1	0.4		0.3	0.1	2.5	1.1	0.4
mg_ac-2	aCCH	3	4	10	x	111	110.8	111	111.8	111.1	111.3	aCCH	a									-0.2	0	0.8	0.1	0.3		0.2	0	0.8	0.1	0.3
mg_oh-1_P1	rMgO	1	2	x	x	1.749	1.726	1.77	1.723	1.743	1.72	rMgO	r									-0.023	0.021	-0.026	-0.006	-0.029		0.023	0.021	0.026	0.006	0.029
mg_oh-1_P1	rHO	3	2	x	x	0.96	0.955	0.965	0.913	0.97	0.96	rHO	r									-0.005	0.005	-0.047	0.01	0		0.005	0.005	0.047	0.01	0
mg_oh-1_P1	aHOMg	3	2	1	x	134.7	158.4	133.1	139.4	166.4	180	aHOMg	a									23.7	-1.6	4.7	31.7	45.3		23.7	1.6	4.7	31.7	45.3
mg_oh-2	rMgO	1	2	x	x	1.783	1.79	1.801	1.731	1.828	1.789	rMgO	r									0.007	0.018	-0.052	0.045	0.006		0.007	0.018	0.052	0.045	0.006
mg_oh-2	rHO	3	2	x	x	0.951	0.951	0.956	0.831	0.965	0.953	rHO	r									0	0.005	-0.12	0.014	0.002		0	0.005	0.12	0.014	0.002
mg_oh-2	aOMgO	2	1	4	x	179	179.2	180	180	179.7	179.9	aOMgO	a									0.2	1	1	0.7	0.9		0.2	1	1	0.7	0.9
mg_oh-2	aHOMg	3	2	1	x	147.8	154	145.5	180	134.4	145.1	aHOMg	a									6.2	-2.3	32.2	-13.4	-2.7		6.2	2.3	32.2	13.4	2.7
mg_o	rMgO	1	2	x	x	1.745	1.747	1.762	1.632	1.723	1.704	rMgO	r									0.002	0.017	-0.113	-0.022	-0.041		0.002	0.017	0.113	0.022	0.041
mg_h2o-1_P2	rMgO	1	2	x	x	1.916	1.933	1.938	1.925	1.959	1.925	rMgO	r									0.017	0.022	0.009	0.043	0.009		0.017	0.022	0.009	0.043	0.009
mg_h2o-1_P2	rHO	3	2	x	x	0.979	0.977	0.983	0.992	0.983	0.977	rHO	r									-0.002	0.004	0.013	0.004	-0.002		0.002	0.004	0.013	0.004	0.002
mg_h2o-1_P2	aHOMg	3	2	1	x	127	127.5	127	127.3	126.8	127.1	aHOMg	a									0.5	0	0.3	-0.2	0.1		0.5	0	0.3	0.2	0.1
mg_h2o-1_P2	aHOH	3	2	4	x	106	105.1	106	105.3	106.5	105.8	aHOH	a									-0.9	0	-0.7	0.5	-0.2		0.9	0	0.7	0.5	0.2
mg_h2o-2_P2	rMgO	1	2	x	x	1.937	1.953	1.958	1.919	1.95	1.917	rMgO	r									0.016	0.021	-0.018	0.013	-0.02		0.016	0.021	0.018	0.013	0.02
mg_h2o-2_P2	rHO	3	2	x	x	0.976	0.975	0.98	0.986	0.98	0.973	rHO	r									-0.001	0.004	0.01	0.004	-0.003		0.001	0.004	0.01	0.004	0.003
mg_h2o-2_P2	aHOMg	3	2	1	x	127.1	127.4	127	126.9	126.2	126.5	aHOMg	a									0.3	-0.1	-0.2	-0.9	-0.6		0.3	0.1	0.2	0.9	0.6
mg_h2o-2_P2	aHOH	3	2	4	x	105.8	105.1	106	106.3	107.6	107.1	aHOH	a									-0.7	0.2	0.5	1.8	1.3		0.7	0.2	0.5	1.8	1.3
mg_h2o-2_P2	aOMgO	2	1	5	x	179.9	179.9	179.9	179.9	179.9	179.9	aOMgO	a									0	0	0	0	0		0	0	0	0	0
mg_h2o-3_P2	rMgO	1	2	x	x	1.966	1.978	1.984	1.947	1.973	1.941	rMgO	r									0.012	0.018	-0.019	0.007	-0.025		0.012	0.018	0.019	0.007	0.025
mg_h2o-3_P2	rHO	3	2	x	x	0.972	0.972	0.977	0.978	0.976	0.968	rHO	r									0	0.005	0.006	0.004	-0.004		0	0.005	0.006	0.004	0.004
mg_h2o-3_P2	aHOMg	3	2	1	x	127.1	127.4	127	126.6	126.1	126.3	aHOMg	a									0.3	-0.1	-0.5	-1	-0.8		0.3	0.1	0.5	1	0.8
mg_h2o-3_P2	aHOH	3	2	4	x	105.8	105.1	106.1	106.8	107.8	107.4	aHOH	a									-0.7	0.3	1	2	1.6		0.7	0.3	1	2	1.6
mg_h2o-3_P2	aOMgO	2	1	7	x	120.1	120.1	120.1	119.9	120	120	aOMgO	a									0	0	-0.2	-0.1	-0.1		0	0	0.2	0.1	0.1
mg_h2o-4_P2	rMgO	1	2	x	x	2	2.009	2.017	1.98	2.013	1.987	rMgO	r									0.009	0.017	-0.02	0.013	-0.013		0.009	0.017	0.02	0.013	0.013
mg_h2o-4_P2	rHO	6	2	x	x	0.97	0.969	0.974	0.97	0.974	0.966	rHO	r									-0.001	0.004	0	0.004	-0.004		0.001	0.004	0	0.004	0.004
mg_h2o-4_P2	aHOMg	6	2	1	x	127.5	127.8	127.4	126.5	125.8	125.9	aHOMg	a									0.3	-0.1	-1	-1.7	-1.6		0.3	0.1	1	1.7	1.6
mg_h2o-4_P2	aHOH	6	2	7	x	105.9	105.2	106.2	107.4	108.6	108.3	aHOH	a									-0.7	0.3	1.5	2.7	2.4		0.7	0.3	1.5	2.7	2.4
mg_h2o-4_P2	aOMgO	2	1	3	x	107.2	107.2	107.2	108	109	109.1	aOMgO	a									0	0	0.8	1.8	1.9		0	0	0.8	1.8	1.9
mg_h2o-5_P2	rMgO	2	3	x	x	2.034	2.039	2.05	2.008	2.054	2.032	rMgO	r									0.005	0.016	-0.026	0.02	-0.002		0.005	0.016	0.026	0.02	0.002
mg_h2o-5_P2	rMgO	2	1	x	x	2.091	2.09	2.105	2.023	2.113	2.095	rMgO	r									-0.001	0.014	-0.068	0.022	0.004		0.001	0.014	0.068	0.022	0.004
mg_h2o-5_P2	aOMgO	3	2	4	x	141	143.5	144.6	152.2	125.6	125.4	aOMgO	a									2.5	3.6	11.2	-15.4	-15.6		2.5	3.6	11.2	15.4	15.6
mg_h2o-5_P2	aOMgO	1	2	3	x	88.2	88.2	88	85.5	89.3	89.4	aOMgO	a									0	-0.2	-2.7	1.1	1.2		0	0.2	2.7	1.1	1.2
mg_h2o-6_P2	rMgO	2	1	x	x	2.1	2.097	2.111	2.052	2.125	2.104	rMgO	r									-0.003	0.011	-0.048	0.025	0.004		0.003	0.011	0.048	0.025	0.004
mg_h2o-6_P2	rHO	8	1	x	x	0.966	0.966	0.97	0.959	0.971	0.963	rHO	r									0	0.004	-0.007	0.005	-0.003		0	0.004	0.007	0.005	0.003
mg_h2o-6_P2	aHOMg	8	1	2	x	126.8	127.1	126.6	125.7	125.3	125.4	aHOMg	a									0.3	-0.2	-1.1	-1.5	-1.4		0.3	0.2	1.1	1.5	1.4
mg_h2o-6_P2	aHOH	8	1	9	x	106.4	105.7	106.8	108.7	109.3	109.3	aHOH	a									-0.7	0.4	2.3	2.9	2.9		0.7	0.4	2.3	2.9	2.9
mg_h2o-6_P2	aOMgO	1	2	3	x	90	90	90	90	90	90	aOMgO	a									0	0	0	0	0		0	0	0	0	0
mg_nh2-1_P1	rMgN	2	1	x	x	1.881	1.867	1.901	1.891	1.869	1.836	rMgN	r									-0.014	0.02	0.01	-0.012	-0.045		0.014	0.02	0.01	0.012	0.045
mg_nh2-1_P1	rHN	3	1	x	x	1.017	1.014	1.021	1.017	1.026	1.017	rHN	r									-0.003	0.004	0	0.009	0		0.003	0.004	0	0.009	0
mg_nh2-1_P1	aHNMg	3	1	2	x	116	120.5	116.2	114.5	125.2	126	aHNMg	a									4.5	0.2	-1.5	9.2	10		4.5	0.2	1.5	9.2	10
mg_nh2-1_P1	aHNH	3	1	4	x	106.5	107.7	106.7	105.8	109.7	108	aHNH	a									1.2	0.2	-0.7	3.2	1.5		1.2	0.2	0.7	3.2	1.5
mg_nh2-2	rMgN	1	2	x	x	1.894	1.909	1.909	1.919	1.916	1.885	rMgN	r									0.015	0.015	0.025	0.022	-0.009		0.015	0.015	0.025	0.022	0.009
mg_nh2-2	rHN	4	2	x	x	1.01	1.01	1.014	1.006	1.02	1.009	rHN	r									0	0.004	-0.004	0.01	-0.001		0	0.004	0.004	0.01	0.001
mg_nh2-2	aNMgN	2	1	3	x	180	180	180	180	180	180	aNMgN	a									0	0	0	0	0		0	0	0	0	0
mg_nh2-2	aHNMg	4	2	1	x	126.5	126.7	126.3	113.7	124.6	125.2	aHNMg	a									0.2	-0.2	-12.8	-1.9	-1.3		0.2	0.2	12.8	1.9	1.3
mg_nh2-2	aHNH	4	2	5	x	107	106.6	107.4	106.3	110.8	109.6	aHNH	a									-0.4	0.4	-0.7	3.8	2.6		0.4	0.4	0.7	3.8	2.6
mg_nh3-1_P2	rMgN	1	2	x	x	2.044	2.058	2.066	2.022	2.112	2.07	rMgN	r									0.014	0.022	-0.022	0.068	0.026		0.014	0.022	0.022	0.068	0.026
mg_nh3-1_P2	rHN	3	2	x	x	1.027	1.026	1.031	1.04	1.039	1.032	rHN	r									-0.001	0.004	0.013	0.012	0.005		0.001	0.004	0.013	0.012	0.005
mg_nh3-1_P2	aHNMg	3	2	1	x	113.6	114.1	113.7	114	113.7	114.7	aHNMg	a									0.5	0.1	0.4	0.1	1.1		0.5	0.1	0.4	0.1	1.1
mg_nh3-1_P2	aHNH	3	2	4	x	105.1	104.5	104.9	104.6	104.9	103.8	aHNH	a									-0.6	-0.2	-0.5	-0.2	-1.3		0.6	0.2	0.5	0.2	1.3
mg_nh3-2_P2	rMgN	1	2	x	x	2.067	2.081	2.086	2.029	2.099	2.058	rMgN	r									0.014	0.019	-0.038	0.032	-0.009		0.014	0.019	0.038	0.032	0.009
mg_nh3-2_P2	rHN	3	2	x	x	1.025	1.024	1.029	1.036	1.036	1.028	rHN	r									-0.001	0.004	0.011	0.011	0.003		0.001	0.004	0.011	0.011	0.003
mg_nh3-2_P2	aHNMg	3	2	1	x	113.9	114.2	114	113.8	113.2	114.1	aHNMg	a									0.3	0.1	-0.1	-0.7	0.2		0.3	0.1	0.1	0.7	0.2
mg_nh3-2_P2	aHNH	3	2	4	x	104.7	104.3	104.6	104.8	105.5	104.5	aHNH	a									-0.4	-0.1	0.1	0.8	-0.2		0.4	0.1	0.1	0.8	0.2
mg_nh3-2_P2	aNMgN	2	1	9	x	179.9	180	180	180	179.9	179.9	aNMgN	a									0.1	0.1	0.1	0	0		0.1	0.1	0.1	0	0
mg_nh3-3_P2	rMgN	1	2	x	x	2.106	2.116	2.122	2.07	2.124	2.086	rMgN	r									0.01	0.016	-0.036	0.018	-0.02		0.01	0.016	0.036	0.018	0.02
mg_nh3-3_P2	rHN	3	2	x	x	1.022	1.021	1.026	1.03	1.033	1.024	rHN	r									-0.001	0.004	0.008	0.011	0.002		0.001	0.004	0.008	0.011	0.002
mg_nh3-3_P2	aHNMg	3	2	1	x	114.1	114.3	114.2	113.7	113.2	114.1	aHNMg	a									0.2	0.1	-0.4	-0.9	0		0.2	0.1	0.4	0.9	0
mg_nh3-3_P2	aHNH	3	2	4	x	104.5	104.2	104.4	104.9	105.7	104.7	aHNH	a									-0.3	-0.1	0.4	1.2	0.2		0.3	0.1	0.4	1.2	0.2
mg_nh3-3_P2	aNMgN	2	1	9	x	119.9	120	120	120	120	120	aNMgN	a									0.1	0.1	0.1	0.1	0.1		0.1	0.1	0.1	0.1	0.1
mg_nh3-4_P2	rMgN	1	2	x	x	2.148	2.153	2.161	2.113	2.149	2.116	rMgN	r									0.005	0.013	-0.035	0.001	-0.032		0.005	0.013	0.035	0.001	0.032
mg_nh3-4_P2	rHN	6	2	x	x	1.021	1.02	1.025	1.026	1.031	1.022	rHN	r									-0.001	0.004	0.005	0.01	0.001		0.001	0.004	0.005	0.01	0.001
mg_nh3-4_P2	aHNMg	6	2	1	x	114.1	114.3	114.1	113.5	112.8	113.6	aHNMg	a									0.2	0	-0.6	-1.3	-0.5		0.2	0	0.6	1.3	0.5
mg_nh3-4_P2	aHNH	6	2	7	x	104.5	104.2	104.4	105.2	106	105.1	aHNH	a									-0.3	-0.1	0.7	1.5	0.6		0.3	0.1	0.7	1.5	0.6
mg_nh3-4_P2	aNMgN	2	1	3	x	109.5	109.5	109.5	109.5	109.5	109.5	aNMgN	a									0	0	0	0	0		0	0	0	0	0
mg_nh3-5_P2	rMgN	1	2	x	x	2.204	2.203	2.215	2.167	2.198	2.17	rMgN	r									-0.001	0.011	-0.037	-0.006	-0.034		0.001	0.011	0.037	0.006	0.034
mg_nh3-5_P2	rMgN	1	5	x	x	2.257	2.248	2.262	2.2	2.26	2.25	rMgN	r									-0.009	0.005	-0.057	0.003	-0.007		0.009	0.005	0.057	0.003	0.007
mg_nh3-5_P2	aNMgN	2	1	8	x	120	120	119.9	120	120	120	aNMgN	a									0	-0.1	0	0	0		0	0.1	0	0	0
mg_nh3-5_P2	aNMgN	5	1	8	x	90.1	90	90.1	90	90	90	aNMgN	a									-0.1	0	-0.1	-0.1	-0.1		0.1	0	0.1	0.1	0.1
mg_nh3-6_P2	rMgN	1	2	x	x	2.284	2.271	2.29	2.234	2.275	2.256	rMgN	r									-0.013	0.006	-0.05	-0.009	-0.028		0.013	0.006	0.05	0.009	0.028
mg_nh3-6_P2	aNMgN	2	1	5	x	90	89.9	89.9	90	89.9	89.9	aNMgN	a									-0.1	-0.1	0	-0.1	-0.1		0.1	0.1	0	0.1	0.1
mg_h-c2h1	rHMg	2	1	x	x	1.689	1.698	1.695	1.705	1.682	1.668	rHMg	r									0.009	0.006	0.016	-0.007	-0.021		0.009	0.006	0.016	0.007	0.021
mg_h-c2h1	rCMg	3	1	x	x	2.024	2.039	2.035	2.023	2.029	2.036	rCMg	r									0.015	0.011	-0.001	0.005	0.012		0.015	0.011	0.001	0.005	0.012
mg_h-c2h1	rC#C	3	4	x	x	1.214	1.232	1.226	1.202	1.21	1.215	rC#C	r									0.018	0.012	-0.012	-0.004	0.001		0.018	0.012	0.012	0.004	0.001
mg_h-c2h1	rCH	4	5	x	x	1.064	1.065	1.069	1.033	1.075	1.064	rCH	r									0.001	0.005	-0.031	0.011	0		0.001	0.005	0.031	0.011	0
mg_h-c2h1	aCMgH	3	1	2	x	180	180	180	180	180	180	aCMgH	a									0	0	0	0	0		0	0	0	0	0
mg_h-c2h1	aC#CMg	4	3	1	x	180	180	180	180	180	180	aC#CMg	a									0	0	0	0	0		0	0	0	0	0
mg_h-c2h3	rHMg	2	1	x	x	1.701	1.708	1.708	1.71	1.686	1.678	rHMg	r									0.007	0.007	0.009	-0.015	-0.023		0.007	0.007	0.009	0.015	0.023
mg_h-c2h3	rCMg	3	1	x	x	2.079	2.091	2.089	2.073	2.095	2.09	rCMg	r									0.012	0.01	-0.006	0.016	0.011		0.012	0.01	0.006	0.016	0.011
mg_h-c2h3	rC=C	3	4	x	x	1.339	1.35	1.348	1.318	1.338	1.337	rC=C	r									0.011	0.009	-0.021	-0.001	-0.002		0.011	0.009	0.021	0.001	0.002
mg_h-c2h3	rCH	3	7	x	x	1.092	1.091	1.096	1.075	1.101	1.093	rCH	r									-0.001	0.004	-0.017	0.009	0.001		0.001	0.004	0.017	0.009	0.001
mg_h-c2h3	aCMgH	3	1	2	x	178.9	178.4	179	180	179.1	179.3	aCMgH	a									-0.5	0.1	1.1	0.2	0.4		0.5	0.1	1.1	0.2	0.4
mg_h-c2h3	aHCMg	7	3	1	x	122.5	124.7	122.1	115.7	121.9	122	aHCMg	a									2.2	-0.4	-6.8	-0.6	-0.5		2.2	0.4	6.8	0.6	0.5
mg_h-c2h3	aC=CMg	4	3	1	x	123.3	122	123.7	118.9	125.2	124.9	aC=CMg	a									-1.3	0.4	-4.4	1.9	1.6		1.3	0.4	4.4	1.9	1.6
mg_h-c2h3	aC=CH	4	3	7	x	114.2	113.3	114.2	125.4	112.9	113.1	aC=CH	a									-0.9	0	11.2	-1.3	-1.1		0.9	0	11.2	1.3	1.1
mg_h-ch3	rHMg	2	1	x	x	1.706	1.712	1.714	1.711	1.685	1.678	rHMg	r									0.006	0.008	0.005	-0.021	-0.028		0.006	0.008	0.005	0.021	0.028
mg_h-ch3	rCMg	3	1	x	x	2.09	2.099	2.099	2.101	2.11	2.103	rCMg	r									0.009	0.009	0.011	0.02	0.013		0.009	0.009	0.011	0.02	0.013
mg_h-ch3	rCH	3	4	x	x	1.093	1.093	1.098	1.08	1.091	1.084	rCH	r									0	0.005	-0.013	-0.002	-0.009		0	0.005	0.013	0.002	0.009
mg_h-ch3	aCMgH	3	1	2	x	180	180	180	180	180	180	aCMgH	a									0	0	0	0	0		0	0	0	0	0
mg_h-ch3	aHCMg	4	3	1	x	111.8	111.8	111.7	108.7	113.4	113.5	aHCMg	a									0	-0.1	-3.1	1.6	1.7		0	0.1	3.1	1.6	1.7
mg_h-cn	rHMg	2	1	x	x	1.68	1.689	1.687	1.701	1.68	1.664	rHMg	r									0.009	0.007	0.021	0	-0.016		0.009	0.007	0.021	0	0.016
mg_h-cn	rCMg	3	1	x	x	2.053	2.064	2.065	2.051	2.064	2.055	rCMg	r									0.011	0.012	-0.002	0.011	0.002		0.011	0.012	0.002	0.011	0.002
mg_h-cn	rCN	3	4	x	x	1.157	1.179	1.168	1.151	1.147	1.154	rCN	r									0.022	0.011	-0.006	-0.01	-0.003		0.022	0.011	0.006	0.01	0.003
mg_h-cn	aCMgH	3	1	2	x	179.7	179.9	180	180	180	179.9	aCMgH	a									0.2	0.3	0.3	0.3	0.2		0.2	0.3	0.3	0.3	0.2
mg_h-cn	aMgCN	1	3	4	x	179.5	179.9	179.9	180	180	179.9	aMgCN	a									0.4	0.4	0.5	0.5	0.4		0.4	0.4	0.5	0.5	0.4
mg_h-nh2	rHMg	2	1	x	x	1.693	1.702	1.7	1.695	1.685	1.674	rHMg	r									0.009	0.007	0.002	-0.008	-0.019		0.009	0.007	0.002	0.008	0.019
mg_h-nh2	rMgN	1	3	x	x	1.897	1.909	1.912	1.887	1.924	1.89	rMgN	r									0.012	0.015	-0.01	0.027	-0.007		0.012	0.015	0.01	0.027	0.007
mg_h-nh2	rHN	4	3	x	x	1.01	1.01	1.014	0.99	1.021	1.009	rHN	r									0	0.004	-0.02	0.011	-0.001		0	0.004	0.02	0.011	0.001
mg_h-nh2	aHMgN	2	1	3	x	180	180	180	180	180	180	aHMgN	a									0	0	0	0	0		0	0	0	0	0
mg_h-nh2	aHNMg	4	3	1	x	126.6	126.8	126.4	124.3	124.8	125.4	aHNMg	a									0.2	-0.2	-2.3	-1.8	-1.2		0.2	0.2	2.3	1.8	1.2
mg_h-nh2	aHNH	4	3	5	x	106.8	106.4	107.1	111.3	110.5	109.3	aHNH	a									-0.4	0.3	4.5	3.7	2.5		0.4	0.3	4.5	3.7	2.5
mg_h-oh	rHMg	4	1	x	x	1.686	1.696	1.691	1.688	1.684	1.671	rHMg	r									0.01	0.005	0.002	-0.002	-0.015		0.01	0.005	0.002	0.002	0.015
mg_h-oh	rMgO	1	2	x	x	1.768	1.781	1.786	1.726	1.822	1.765	rMgO	r									0.013	0.018	-0.042	0.054	-0.003		0.013	0.018	0.042	0.054	0.003
mg_h-oh	rHO	3	2	x	x	0.949	0.95	0.953	0.843	0.964	0.952	rHO	r									0.001	0.004	-0.106	0.015	0.003		0.001	0.004	0.106	0.015	0.003
mg_h-oh	aHMgO	4	1	2	x	180	180	179.9	180	178.1	180	aHMgO	a									0	-0.1	0	-1.9	0		0	0.1	0	1.9	0
mg_h-oh	aHOMg	3	2	1	x	179.9	179.9	179.8	180	138.6	179.9	aHOMg	a									0	-0.1	0.1	-41.3	0		0	0.1	0.1	41.3	0
mg_h-ono	rHMg	2	1	x	x	1.68	1.689	1.685	1.69	1.68	1.662	rHMg	r									0.009	0.005	0.01	0	-0.018		0.009	0.005	0.01	0	0.018
mg_h-ono	rMgO	1	3	x	x	1.95	1.981	1.967	1.843	2.043	1.969	rMgO	r									0.031	0.017	-0.107	0.093	0.019		0.031	0.017	0.107	0.093	0.019
mg_h-ono	rNO	4	3	x	x	1.327	1.322	1.332	1.327	1.342	1.353	rNO	r									-0.005	0.005	0	0.015	0.026		0.005	0.005	0	0.015	0.026
mg_h-ono	rN=O	4	5	x	x	1.191	1.209	1.202	1.186	1.218	1.204	rN=O	r									0.018	0.011	-0.005	0.027	0.013		0.018	0.011	0.005	0.027	0.013
mg_h-ono	aHMgO	2	1	3	x	164.2	162.9	165	175.8	165.3	164.9	aHMgO	a									-1.3	0.8	11.6	1.1	0.7		1.3	0.8	11.6	1.1	0.7
mg_h-ono	aMgON	1	3	4	x	78	76	79.1	116.7	71	70.7	aMgON	a									-2	1.1	38.7	-7	-7.3		2	1.1	38.7	7	7.3
mg_h-ono	aON=O	3	4	5	x	118.6	118.5	118.2	115.6	116.5	117.7	aON=O	a									-0.1	-0.4	-3	-2.1	-0.9		0.1	0.4	3	2.1	0.9
mg_cn-oh	rMgO	1	4	x	x	1.757	1.766	1.781	1.722	1.802	1.754	rMgO	r									0.009	0.024	-0.035	0.045	-0.003		0.009	0.024	0.035	0.045	0.003
mg_cn-oh	rCMg	2	1	x	x	2.037	2.052	2.047	2.013	2.048	2.042	rCMg	r									0.015	0.01	-0.024	0.011	0.005		0.015	0.01	0.024	0.011	0.005
mg_cn-oh	rHO	5	4	x	x	0.95	0.95	0.954	0.843	0.964	0.953	rHO	r									0	0.004	-0.107	0.014	0.003		0	0.004	0.107	0.014	0.003
mg_cn-oh	rCN	2	3	x	x	1.156	1.178	1.168	1.15	1.147	1.153	rCN	r									0.022	0.012	-0.006	-0.009	-0.003		0.022	0.012	0.006	0.009	0.003
mg_cn-oh	aCMgO	2	1	4	x	178	180	177.4	180	175.8	179.2	aCMgO	a									2	-0.6	2	-2.2	1.2		2	0.6	2	2.2	1.2
mg_cn-oh	aHOMg	5	4	1	x	165.6	179.9	155.4	180	142.1	175.7	aHOMg	a									14.3	-10.2	14.4	-23.5	10.1		14.3	10.2	14.4	23.5	10.1
mg_cn-oh	aMgCN	1	2	3	x	179.7	180	179.9	180	179	179.8	aMgCN	a									0.3	0.2	0.3	-0.7	0.1		0.3	0.2	0.3	0.7	0.1
mg_s	rMgS	1	2	x	x	2.153	2.16	2.165	1.933	2.15	2.153	rMgS	r									0.007	0.012	-0.22	-0.003	0		0.007	0.012	0.22	0.003	0
mg_h-sh	rHMg	4	1	x	x	1.688	1.696	1.697	1.705	1.684	1.669	rHMg	r									0.008	0.009	0.017	-0.004	-0.019		0.008	0.009	0.017	0.004	0.019
mg_h-sh	rMgS	1	2	x	x	2.31	2.314	2.317	2.156	2.32	2.316	rMgS	r									0.004	0.007	-0.154	0.01	0.006		0.004	0.007	0.154	0.01	0.006
mg_h-sh	rHS	3	2	x	x	1.348	1.342	1.352	1.351	1.345	1.339	rHS	r									-0.006	0.004	0.003	-0.003	-0.009		0.006	0.004	0.003	0.003	0.009
mg_h-sh	aHMgS	4	1	2	x	178.8	179	179.4	177.1	179.3	178.3	aHMgS	a									0.2	0.6	-1.7	0.5	-0.5		0.2	0.6	1.7	0.5	0.5
mg_h-sh	aHSMg	3	2	1	x	93.2	92.4	93.3	102.3	105.3	106.4	aHSMg	a									-0.8	0.1	9.1	12.1	13.2		0.8	0.1	9.1	12.1	13.2
mg_oh-sh	rMgO	1	2	x	x	1.774	1.778	1.797	1.726	1.812	1.767	rMgO	r									0.004	0.023	-0.048	0.038	-0.007		0.004	0.023	0.048	0.038	0.007
mg_oh-sh	rMgS	1	4	x	x	2.296	2.306	2.304	2.084	2.312	2.318	rMgS	r									0.01	0.008	-0.212	0.016	0.022		0.01	0.008	0.212	0.016	0.022
mg_oh-sh	rHO	3	2	x	x	0.951	0.95	0.956	0.845	0.965	0.953	rHO	r									-0.001	0.005	-0.106	0.014	0.002		0.001	0.005	0.106	0.014	0.002
mg_oh-sh	rHS	5	4	x	x	1.348	1.341	1.352	1.353	1.344	1.339	rHS	r									-0.007	0.004	0.005	-0.004	-0.009		0.007	0.004	0.005	0.004	0.009
mg_oh-sh	aOMgS	2	1	4	x	176.9	178.1	177	178.9	177.1	177.6	aOMgS	a									1.2	0.1	2	0.2	0.7		1.2	0.1	2	0.2	0.7
mg_oh-sh	aHOMg	3	2	1	x	153.8	164.4	147.2	178.9	138.5	156.7	aHOMg	a									10.6	-6.6	25.1	-15.3	2.9		10.6	6.6	25.1	15.3	2.9
mg_oh-sh	aHSMg	5	4	1	x	93.2	92.2	93.1	99.6	105.1	105.7	aHSMg	a									-1	-0.1	6.4	11.9	12.5		1	0.1	6.4	11.9	12.5
mg_sh-1_P1	rMgS	1	2	x	x	2.246	2.244	2.256	2.045	2.248	2.227	rMgS	r									-0.002	0.01	-0.201	0.002	-0.019		0.002	0.01	0.201	0.002	0.019
mg_sh-1_P1	rHS	3	2	x	x	1.353	1.347	1.355	1.362	1.349	1.344	rHS	r									-0.006	0.002	0.009	-0.004	-0.009		0.006	0.002	0.009	0.004	0.009
mg_sh-1_P1	aHSMg	3	2	1	x	92.3	90.8	92.8	98.9	107.2	108.9	aHSMg	a									-1.5	0.5	6.6	14.9	16.6		1.5	0.5	6.6	14.9	16.6
mg_sh-2	rMgS	1	2	x	x	2.297	2.302	2.305	2.115	2.307	2.299	rMgS	r									0.005	0.008	-0.182	0.01	0.002		0.005	0.008	0.182	0.01	0.002
mg_sh-2	rHS	3	2	x	x	1.348	1.342	1.352	1.354	1.345	1.339	rHS	r									-0.006	0.004	0.006	-0.003	-0.009		0.006	0.004	0.006	0.003	0.009
mg_sh-2	aSMgS	2	1	4	x	178.4	178.7	179.9	179.6	178.5	177	aSMgS	a									0.3	1.5	1.2	0.1	-1.4		0.3	1.5	1.2	0.1	1.4
mg_sh-2	aHSMg	3	2	1	x	93.2	92.1	93.1	101.7	105.3	106.3	aHSMg	a									-1.1	-0.1	8.5	12.1	13.1		1.1	0.1	8.5	12.1	13.1
mg_sh2-1_P2	rMgS	1	2	x	x	2.466	2.466	2.478	2.182	2.455	2.538	rMgS	r									0	0.012	-0.284	-0.011	0.072		0	0.012	0.284	0.011	0.072
mg_sh2-1_P2	rHS	3	2	x	x	1.362	1.353	1.362	1.361	1.357	1.354	rHS	r									-0.009	0	-0.001	-0.005	-0.008		0.009	0	0.001	0.005	0.008
mg_sh2-1_P2	aHSMg	3	2	1	x	98.5	98.3	100	102.5	116.1	115.7	aHSMg	a									-0.2	1.5	4	17.6	17.2		0.2	1.5	4	17.6	17.2
mg_sh2-1_P2	aHSH	3	2	4	x	94.4	94.3	95.4	97.6	100.9	100.5	aHSH	a									-0.1	1	3.2	6.5	6.1		0.1	1	3.2	6.5	6.1
mg_sh2-2_P2	rMgS	1	2	x	x	2.489	2.49	2.495	2.214	2.456	2.535	rMgS	r									0.001	0.006	-0.275	-0.033	0.046		0.001	0.006	0.275	0.033	0.046
mg_sh2-2_P2	rHS	4	3	x	x	1.358	1.35	1.358	1.358	1.354	1.35	rHS	r									-0.008	0	0	-0.004	-0.008		0.008	0	0	0.004	0.008
mg_sh2-2_P2	aHSMg	4	3	1	x	99.3	99.1	101.1	107.3	114.6	114	aHSMg	a									-0.2	1.8	8	15.3	14.7		0.2	1.8	8	15.3	14.7
mg_sh2-2_P2	aHSH	4	3	5	x	94.4	94.2	95.2	98.6	100.9	100.4	aHSH	a									-0.2	0.8	4.2	6.5	6		0.2	0.8	4.2	6.5	6
mg_sh2-2_P2	aSMgS	2	1	3	x	175.4	174.1	177.7	172.7	164.6	163.2	aSMgS	a									-1.3	2.3	-2.7	-10.8	-12.2		1.3	2.3	2.7	10.8	12.2
mg_sh2-3_P2	rMgS	1	2	x	x	2.533	2.527	2.536	2.284	2.49	2.567	rMgS	r									-0.006	0.003	-0.249	-0.043	0.034		0.006	0.003	0.249	0.043	0.034
mg_sh2-3_P2	rHS	5	4	x	x	1.354	1.346	1.354	1.357	1.351	1.348	rHS	r									-0.008	0	0.003	-0.003	-0.006		0.008	0	0.003	0.003	0.006
mg_sh2-3_P2	aHSMg	5	4	1	x	100.6	100	102.6	110.1	114.5	113.7	aHSMg	a									-0.6	2	9.5	13.9	13.1		0.6	2	9.5	13.9	13.1
mg_sh2-3_P2	aHSH	5	4	6	x	94.3	94	95.2	98.8	100.4	100	aHSH	a									-0.3	0.9	4.5	6.1	5.7		0.3	0.9	4.5	6.1	5.7
mg_sh2-3_P2	aSMgS	3	1	4	x	116.9	117	118.1	120	117.6	118.2	aSMgS	a									0.1	1.2	3.1	0.7	1.3		0.1	1.2	3.1	0.7	1.3
mg_sh2-4_P2	rMgS	1	2	x	x	2.583	2.567	2.581	2.358	2.534	2.605	rMgS	r									-0.016	-0.002	-0.225	-0.049	0.022		0.016	0.002	0.225	0.049	0.022
mg_sh2-4_P2	rHS	6	2	x	x	1.351	1.344	1.352	1.357	1.35	1.346	rHS	r									-0.007	0.001	0.006	-0.001	-0.005		0.007	0.001	0.006	0.001	0.005
mg_sh2-4_P2	aHSMg	6	2	1	x	102.8	102.6	105	111.3	113.7	112.8	aHSMg	a									-0.2	2.2	8.5	10.9	10		0.2	2.2	8.5	10.9	10
mg_sh2-4_P2	aHSH	6	2	7	x	94.1	93.9	94.9	98.6	100	99.6	aHSH	a									-0.2	0.8	4.5	5.9	5.5		0.2	0.8	4.5	5.9	5.5
mg_sh2-4_P2	aSMgS	2	1	3	x	105.6	105.1	106	109.3	110.1	110.5	aSMgS	a									-0.5	0.4	3.7	4.5	4.9		0.5	0.4	3.7	4.5	4.9
mg_sh2-5_P2	rMgS	1	13	x	x	2.635	2.609	2.637	2.412	2.588	2.644	rMgS	r									-0.026	0.002	-0.223	-0.047	0.009		0.026	0.002	0.223	0.047	0.009
mg_sh2-5_P2	rMgS	1	12	x	x	2.711	2.668	2.705	2.545	2.644	2.695	rMgS	r									-0.043	-0.006	-0.166	-0.067	-0.016		0.043	0.006	0.166	0.067	0.016
mg_sh2-5_P2	aSMgS	13	1	14	x	126.3	127.1	125.6	119.2	122.1	127.6	aSMgS	a									0.8	-0.7	-7.1	-4.2	1.3		0.8	0.7	7.1	4.2	1.3
mg_sh2-5_P2	aSMgS	12	1	13	x	86	86.5	83.9	89.7	89.2	87.3	aSMgS	a									0.5	-2.1	3.7	3.2	1.3		0.5	2.1	3.7	3.2	1.3
mg_sh2-6_P2	rMgS	1	14	x	x	2.74	2.689	2.729	2.547	2.654	2.701	rMgS	r									-0.051	-0.011	-0.193	-0.086	-0.039		0.051	0.011	0.193	0.086	0.039
mg_sh2-6_P2	aSMgS	14	1	15	x	87.1	87.1	86.4	85.7	87.4	86.9	aSMgS	a									0	-0.7	-1.4	0.3	-0.2		0	0.7	1.4	0.3	0.2
mg_ph2-1_P1	rMgP	2	1	x	x	2.44	2.421	2.448	2.374	2.421	2.465	rMgP	r									-0.019	0.008	-0.066	-0.019	0.025		0.019	0.008	0.066	0.019	0.025
mg_ph2-1_P1	rHP	3	1	x	x	1.427	1.423	1.429	1.456	1.424	1.422	rHP	r									-0.004	0.002	0.029	-0.003	-0.005		0.004	0.002	0.029	0.003	0.005
mg_ph2-1_P1	aHPMg	3	1	2	x	88.8	86.8	89.7	100.2	98.2	99	aHPMg	a									-2	0.9	11.4	9.4	10.2		2	0.9	11.4	9.4	10.2
mg_ph2-1_P1	aHPH	3	1	4	x	92.7	92.3	93.1	101	96.2	96.5	aHPH	a									-0.4	0.4	8.3	3.5	3.8		0.4	0.4	8.3	3.5	3.8
mg_ph2-2	rMgP	1	2	x	x	2.466	2.462	2.47	2.387	2.466	2.475	rMgP	r									-0.004	0.004	-0.079	0	0.009		0.004	0.004	0.079	0	0.009
mg_ph2-2	rHP	4	2	x	x	1.427	1.421	1.43	1.453	1.421	1.419	rHP	r									-0.006	0.003	0.026	-0.006	-0.008		0.006	0.003	0.026	0.006	0.008
mg_ph2-2	aPMgP	2	1	3	x	180	180	180	180	180	180	aPMgP	a									0	0	0	0	0		0	0	0	0	0
mg_ph2-2	aHPMg	4	2	1	x	90.8	89.7	90.9	100.1	99.5	100.3	aHPMg	a									-1.1	0.1	9.3	8.7	9.5		1.1	0.1	9.3	8.7	9.5
mg_ph2-2	aHPH	4	2	5	x	92.9	92.6	93	100.6	96.3	96.7	aHPH	a									-0.3	0.1	7.7	3.4	3.8		0.3	0.1	7.7	3.4	3.8
mg_ph3-1_P2	rMgP	2	1	x	x	2.546	2.549	2.554	2.415	2.554	2.611	rMgP	r									0.003	0.008	-0.131	0.008	0.065		0.003	0.008	0.131	0.008	0.065
mg_ph3-1_P2	rHP	3	1	x	x	1.408	1.401	1.408	1.459	1.416	1.414	rHP	r									-0.007	0	0.051	0.008	0.006		0.007	0	0.051	0.008	0.006
mg_ph3-1_P2	aHPMg	3	1	2	x	111.9	112.4	112	110.7	115.3	115	aHPMg	a									0.5	0.1	-1.2	3.4	3.1		0.5	0.1	1.2	3.4	3.1
mg_ph3-1_P2	aHPH	3	1	4	x	107	106.3	106.8	108.3	103.1	103.4	aHPH	a									-0.7	-0.2	1.3	-3.9	-3.6		0.7	0.2	1.3	3.9	3.6
mg_ph3-2_P2	rMgP	2	1	x	x	2.567	2.574	2.573	2.435	2.559	2.606	rMgP	r									0.007	0.006	-0.132	-0.008	0.039		0.007	0.006	0.132	0.008	0.039
mg_ph3-2_P2	rHP	3	6	x	x	1.407	1.4	1.407	1.456	1.413	1.411	rHP	r									-0.007	0	0.049	0.006	0.004		0.007	0	0.049	0.006	0.004
mg_ph3-2_P2	aHPMg	3	6	2	x	114.2	114.2	114.3	111.5	115.7	115.3	aHPMg	a									0	0.1	-2.7	1.5	1.1		0	0.1	2.7	1.5	1.1
mg_ph3-2_P2	aHPH	3	6	4	x	104.4	104.3	104.3	107.4	102.6	103	aHPH	a									-0.1	-0.1	3	-1.8	-1.4		0.1	0.1	3	1.8	1.4
mg_ph3-2_P2	aPMgP	1	2	6	x	179.9	180	179.9	180	179.9	179.9	aPMgP	a									0.1	0	0.1	0	0		0.1	0	0.1	0	0
mg_ph3-3_P2	rMgP	2	1	x	x	2.615	2.616	2.621	2.506	2.598	2.635	rMgP	r									0.001	0.006	-0.109	-0.017	0.02		0.001	0.006	0.109	0.017	0.02
mg_ph3-3_P2	rHP	3	6	x	x	1.407	1.4	1.408	1.453	1.413	1.41	rHP	r									-0.007	0.001	0.046	0.006	0.003		0.007	0.001	0.046	0.006	0.003
mg_ph3-3_P2	aHPMg	3	6	2	x	116.3	116.1	116.3	113.1	116.7	116.4	aHPMg	a									-0.2	0	-3.2	0.4	0.1		0.2	0	3.2	0.4	0.1
mg_ph3-3_P2	aHPH	3	6	4	x	102.3	102.5	102.3	105.7	101.5	102	aHPH	a									0.2	0	3.4	-0.8	-0.3		0.2	0	3.4	0.8	0.3
mg_ph3-3_P2	aPMgP	1	2	6	x	120	120	120	120	120	120	aPMgP	a									0	0	0	0	0		0	0	0	0	0
mg_ph3-4_P2	rMgP	1	2	x	x	2.658	2.649	2.66	2.579	2.635	2.659	rMgP	r									-0.009	0.002	-0.079	-0.023	0.001		0.009	0.002	0.079	0.023	0.001
mg_ph3-4_P2	rHP	6	2	x	x	1.408	1.402	1.409	1.453	1.413	1.41	rHP	r									-0.006	0.001	0.045	0.005	0.002		0.006	0.001	0.045	0.005	0.002
mg_ph3-4_P2	aHPMg	6	2	1	x	117	116.8	117.1	113.9	117.1	116.7	aHPMg	a									-0.2	0.1	-3.1	0.1	-0.3		0.2	0.1	3.1	0.1	0.3
mg_ph3-4_P2	aHPH	6	2	7	x	100.9	101.2	100.9	104.7	100.9	101.3	aHPH	a									0.3	0	3.8	0	0.4		0.3	0	3.8	0	0.4
mg_ph3-4_P2	aPMgP	2	1	3	x	109.5	109.5	109.5	109.5	109.5	109.5	aPMgP	a									0	0	0	0	0		0	0	0	0	0

## Sheet: mg_geom_large
Supporting Information for
Parameterization of DFTB3/3OB for Magnesium and Zinc for Chemical and Biological Applications
Xiya Lu, Michael Gaus, Marcus Elstner and Qiang Cui
													N = number of comparisons
Geometric properties													MAD = Mean absolute deviation
Calculated geometries (information based on xyz coordinates provided in the next sheet)													MAX = Maximal absolute deviation
(bond lengths “r” in Angstrom, angles “a” in degree)													MSE = Mean signed error
													Statistics with B3LYP/aug-cc-pVTZ being the reference							Differences to B3LYP/aug-cc-pVTZ					Absolute differences to B3LYP/aug-cc-pVTZ
						B3LYP	B3LYP	PM6	DFTB3/MIO	DFTB3/3OB					B3LYP	PM6	DFTB3/MIO	DFTB3/3OB		B3LYP	PM6	DFTB3/MIO	DFTB3/3OB		B3LYP	PM6	DFTB3/MIO	DFTB3/3OB
molecule	property	atoms involved				aug-cc-pVTZ	6-31+G(d,p)				property	type			6-31+G(d,p)					6-31+G(d,p)					6-31+G(d,p)
mg_h2o-2-dep_P1	rMgO	1	2	x	x	1.978	1.998	1.938	1.978	1.941	rMgO	r	N for bond lengths	329						0.02	-0.04	0	-0.037		0.02	0.04	0	0.037
mg_h2o-2-dep_P1	rMgO	1	5	x	x	1.721	1.754	1.695	1.76	1.725	rMgO	r	MAD for bond lengths		0.0114863	0.0633161	0.0412553	0.0183708		0.033	-0.026	0.039	0.004		0.033	0.026	0.039	0.004
mg_h2o-2-dep_P1	rHO	3	2	x	x	0.97	0.973	0.965	0.972	0.963	rHO	r	MAX for bond lengths		0.033	1.414	0.481	0.125		0.003	-0.005	0.002	-0.007		0.003	0.005	0.002	0.007
mg_h2o-2-dep_P1	rHO	4	2	x	x	0.969	0.973	0.965	0.971	0.963	rHO	r	MSE for bond lengths		0.0110061	-0.0144772	0.0312675	-0.000449848		0.004	-0.004	0.002	-0.006		0.004	0.004	0.002	0.006
mg_h2o-2-dep_P1	rHO	6	5	x	x	0.952	0.958	0.855	0.967	0.956	rHO	r								0.006	-0.097	0.015	0.004		0.006	0.097	0.015	0.004
mg_h2o-2-dep_P1	aOMgO	5	1	2	x	174.1	168.2	179.6	157.7	179.8	aOMgO	a	N for bond angles	658						-5.9	5.5	-16.4	5.7		5.9	5.5	16.4	5.7
mg_h2o-2-dep_P1	aHOMg	3	2	1	x	126.2	125.7	125.5	123.5	125.2	aHOMg	a	MAD for bond angles		0.694529	11.2178	4.52523	3.07021		-0.5	-0.7	-2.7	-1		0.5	0.7	2.7	1
mg_h2o-2-dep_P1	aHOMg	4	2	1	x	127.2	127.4	125.5	126.7	125.2	aHOMg	a	MAX for bond angles		17.4	64	37.5	30.8		0.2	-1.7	-0.5	-2		0.2	1.7	0.5	2
mg_h2o-2-dep_P1	aHOMg	6	5	1	x	167.6	150.2	179.8	150.8	179.8	aHOMg	a	MSE for bond angles		-0.108815	-1.80927	-0.454407	0.208511		-17.4	12.2	-16.8	12.2		17.4	12.2	16.8	12.2
mg_h2o-3-dep_P1	rMgO	1	2	x	x	2.002	2.02	1.987	2.015	1.982	rMgO	r								0.018	-0.015	0.013	-0.02		0.018	0.015	0.013	0.02
mg_h2o-3-dep_P1	rMgO	1	7	x	x	1.994	2.006	1.988	1.998	1.967	rMgO	r	MAD of different bond types							0.012	-0.006	0.004	-0.027		0.012	0.006	0.004	0.027
mg_h2o-3-dep_P1	rMgO	1	9	x	x	1.749	1.778	1.711	1.801	1.77	rMgO	r	rMgN	21	0.00938095	0.027619	0.039	0.0252857		0.029	-0.038	0.052	0.021		0.029	0.038	0.052	0.021
mg_h2o-3-dep_P1	aOMgO	2	1	7	x	116.5	118.1	102.9	117.4	116.4	aOMgO	a	rMgO	230	0.0128609	0.038487	0.0495478	0.0180304		1.6	-13.6	0.9	-0.1		1.6	13.6	0.9	0.1
mg_h2o-3-dep_P1	aOMgO	2	1	9	x	132.7	139.7	128.6	134.6	133.8	aOMgO	a	rMgP	9	0.00622222	0.242889	0.00844444	0.0217778		7	-4.1	1.9	1.1		7	4.1	1.9	1.1
mg_h2o-3-dep_P1	aOMgO	7	1	9	x	110.9	102.2	128.5	108.1	109.8	aOMgO	a	rMgS	20	0.0053	0.39745	0.03645	0.037		-8.7	17.6	-2.8	-1.1		8.7	17.6	2.8	1.1
mg_h2o-4-dep_P1	rMgO	1	2	x	x	2.034	2.05	2.025	2.053	2.028	rMgO	r								0.016	-0.009	0.019	-0.006		0.016	0.009	0.019	0.006
mg_h2o-4-dep_P1	rMgO	1	3	x	x	2.024	2.04	1.994	2.048	2.023	rMgO	r	MAX of different bond types							0.016	-0.03	0.024	-0.001		0.016	0.03	0.024	0.001
mg_h2o-4-dep_P1	rMgO	1	4	x	x	2.018	2.037	2.055	2.042	2.015	rMgO	r	rMgN	21	0.019	0.104	0.481	0.051		0.019	0.037	0.024	-0.003		0.019	0.037	0.024	0.003
mg_h2o-4-dep_P1	rMgO	1	5	x	x	1.8	1.822	1.777	1.839	1.807	rMgO	r	rMgO	230	0.033	0.17	0.418	0.1		0.022	-0.023	0.039	0.007		0.022	0.023	0.039	0.007
mg_h2o-4-dep_P1	aOMgO	2	1	3	x	103.3	103.3	94.9	107.2	106.2	aOMgO	a	rMgP	9	0.009	1.414	0.043	0.044		0	-8.4	3.9	2.9		0	8.4	3.9	2.9
mg_h2o-4-dep_P1	aOMgO	2	1	4	x	103.3	101.7	105.1	105.8	106	aOMgO	a	rMgS	20	0.027	1.383	0.109	0.125		-1.6	1.8	2.5	2.7		1.6	1.8	2.5	2.7
mg_h2o-4-dep_P1	aOMgO	2	1	5	x	133.4	134.3	129.2	114.9	116.4	aOMgO	a								0.9	-4.2	-18.5	-17		0.9	4.2	18.5	17
mg_h2o-4-dep_P1	aOMgO	3	1	4	x	119.2	120.4	122.5	110.3	109.1	aOMgO	a	MSE of different bond types							1.2	3.3	-8.9	-10.1		1.2	3.3	8.9	10.1
mg_h2o-4-dep_P1	aOMgO	3	1	5	x	110.1	111.7	127.6	120.2	119.3	aOMgO	a	rMgN	21	0.00938095	-0.0165714	0.0278571	-0.0203333		1.6	17.5	10.1	9.2		1.6	17.5	10.1	9.2
mg_h2o-4-dep_P1	aOMgO	4	1	5	x	88	85.2	76.7	97.1	98.8	aOMgO	a	rMgO	230	0.0126261	-0.0228696	0.0436696	0.00151739		-2.8	-11.3	9.1	10.8		2.8	11.3	9.1	10.8
mg_h2o-5-dep_P1	rMgO	2	1	x	x	2.094	2.104	2.062	2.095	2.074	rMgO	r	rMgP	9	0.00622222	0.0713333	0.00422222	0.000444444		0.01	-0.032	0.001	-0.02		0.01	0.032	0.001	0.02
mg_h2o-5-dep_P1	rMgO	2	3	x	x	2.051	2.064	2.072	2.106	2.083	rMgO	r	rMgS	20	0.0001	-0.03105	-0.03515	-0.0059		0.013	0.021	0.055	0.032		0.013	0.021	0.055	0.032
mg_h2o-5-dep_P1	rMgO	2	4	x	x	2.045	2.063	2.068	2.092	2.074	rMgO	r								0.018	0.023	0.047	0.029		0.018	0.023	0.047	0.029
mg_h2o-5-dep_P1	rMgO	2	5	x	x	2.046	2.06	2.01	2.073	2.046	rMgO	r								0.014	-0.036	0.027	0		0.014	0.036	0.027	0
mg_h2o-5-dep_P1	rMgO	2	6	x	x	1.896	1.916	1.865	1.939	1.9	rMgO	r								0.02	-0.031	0.043	0.004		0.02	0.031	0.043	0.004
mg_h2o-5-dep_P1	aOMgO	1	2	3	x	94	95.6	100.1	91.6	90.7	aOMgO	a								1.6	6.1	-2.4	-3.3		1.6	6.1	2.4	3.3
mg_h2o-5-dep_P1	aOMgO	1	2	4	x	95.1	95.6	102.5	90.9	89.8	aOMgO	a								0.5	7.4	-4.2	-5.3		0.5	7.4	4.2	5.3
mg_h2o-5-dep_P1	aOMgO	1	2	5	x	90	89.3	73	99.1	98.6	aOMgO	a								-0.7	-17	9.1	8.6		0.7	17	9.1	8.6
mg_h2o-5-dep_P1	aOMgO	1	2	6	x	170.1	170.3	169.9	171.7	173	aOMgO	a								0.2	-0.2	1.6	2.9		0.2	0.2	1.6	2.9
mg_h2o-5-dep_P1	aOMgO	3	2	4	x	121.4	119.2	115	139	142.2	aOMgO	a								-2.2	-6.4	17.6	20.8		2.2	6.4	17.6	20.8
mg_h2o-5-dep_P1	aOMgO	3	2	5	x	118.9	119.8	123.4	108.3	107.6	aOMgO	a								0.9	4.5	-10.6	-11.3		0.9	4.5	10.6	11.3
mg_h2o-5-dep_P1	aOMgO	3	2	6	x	80.4	79.7	73.7	80.3	82.3	aOMgO	a								-0.7	-6.7	-0.1	1.9		0.7	6.7	0.1	1.9
mg_h2o-5-dep_P1	aOMgO	4	2	5	x	118.9	119.9	121.5	111.7	109.7	aOMgO	a								1	2.6	-7.2	-9.2		1	2.6	7.2	9.2
mg_h2o-5-dep_P1	aOMgO	4	2	6	x	81.1	79.6	73.8	96.4	95.2	aOMgO	a								-1.5	-7.3	15.3	14.1		1.5	7.3	15.3	14.1
mg_h2o-5-dep_P1	aOMgO	5	2	6	x	99.8	100.4	117	81.9	84.2	aOMgO	a								0.6	17.2	-17.9	-15.6		0.6	17.2	17.9	15.6
mg_h2o-6-dep_P1	rMgO	2	1	x	x	2.148	2.168	2.133	2.13	2.103	rMgO	r								0.02	-0.015	-0.018	-0.045		0.02	0.015	0.018	0.045
mg_h2o-6-dep_P1	rMgO	2	3	x	x	2.132	2.137	2.143	2.169	2.128	rMgO	r								0.005	0.011	0.037	-0.004		0.005	0.011	0.037	0.004
mg_h2o-6-dep_P1	rMgO	2	4	x	x	2.119	2.129	2.059	2.111	2.092	rMgO	r								0.01	-0.06	-0.008	-0.027		0.01	0.06	0.008	0.027
mg_h2o-6-dep_P1	rMgO	2	5	x	x	1.939	1.957	1.885	2.033	1.996	rMgO	r								0.018	-0.054	0.094	0.057		0.018	0.054	0.094	0.057
mg_h2o-6-dep_P1	rMgO	2	6	x	x	2.097	2.109	2.105	2.09	2.071	rMgO	r								0.012	0.008	-0.007	-0.026		0.012	0.008	0.007	0.026
mg_h2o-6-dep_P1	rMgO	2	7	x	x	2.109	2.118	2.098	2.136	2.109	rMgO	r								0.009	-0.011	0.027	0		0.009	0.011	0.027	0
mg_h2o-6-dep_P1	aOMgO	1	2	3	x	98.5	99.3	102.1	93.5	93.3	aOMgO	a								0.8	3.6	-5	-5.2		0.8	3.6	5	5.2
mg_h2o-6-dep_P1	aOMgO	1	2	4	x	80.8	79.4	71.2	90	89.9	aOMgO	a								-1.4	-9.6	9.2	9.1		1.4	9.6	9.2	9.1
mg_h2o-6-dep_P1	aOMgO	1	2	5	x	76.6	75.3	71.7	78.2	80.1	aOMgO	a								-1.3	-4.9	1.6	3.5		1.3	4.9	1.6	3.5
mg_h2o-6-dep_P1	aOMgO	1	2	6	x	100.2	101.1	149.2	101.4	99.7	aOMgO	a								0.9	49	1.2	-0.5		0.9	49	1.2	0.5
mg_h2o-6-dep_P1	aOMgO	1	2	7	x	162.7	161.5	127.3	157.4	160.9	aOMgO	a								-1.2	-35.4	-5.3	-1.8		1.2	35.4	5.3	1.8
mg_h2o-6-dep_P1	aOMgO	3	2	4	x	174.3	173.6	140.3	173.8	174.9	aOMgO	a								-0.7	-34	-0.5	0.6		0.7	34	0.5	0.6
mg_h2o-6-dep_P1	aOMgO	3	2	5	x	76.3	75.7	70.8	74	75.9	aOMgO	a								-0.6	-5.5	-2.3	-0.4		0.6	5.5	2.3	0.4
mg_h2o-6-dep_P1	aOMgO	3	2	6	x	89.7	90.8	69.3	92.2	92.5	aOMgO	a								1.1	-20.4	2.5	2.8		1.1	20.4	2.5	2.8
mg_h2o-6-dep_P1	aOMgO	3	2	7	x	93.7	94.4	129.9	84.3	85.7	aOMgO	a								0.7	36.2	-9.4	-8		0.7	36.2	9.4	8
mg_h2o-6-dep_P1	aOMgO	4	3	5	x	51	51.7	65.3	48.5	48.1	aOMgO	a								0.7	14.3	-2.5	-2.9		0.7	14.3	2.5	2.9
mg_h2o-6-dep_P1	aOMgO	4	3	6	x	42	41.4	51.6	45	44.7	aOMgO	a								-0.6	9.6	3	2.7		0.6	9.6	3	2.7
mg_h2o-6-dep_P1	aOMgO	4	3	7	x	43.9	44	36.9	44.8	44.7	aOMgO	a								0.1	-7	0.9	0.8		0.1	7	0.9	0.8
mg_h2o-6-dep_P1	aOMgO	5	3	6	x	92.9	93	97.7	93.4	92.7	aOMgO	a								0.1	4.8	0.5	-0.2		0.1	4.8	0.5	0.2
mg_h2o-6-dep_P1	aOMgO	5	3	7	x	63.1	64.2	59.6	58.5	58.7	aOMgO	a								1.1	-3.5	-4.6	-4.4		1.1	3.5	4.6	4.4
mg_h2o-6-dep_P1	aOMgO	6	3	7	x	59.7	58.7	38.1	66.3	65.1	aOMgO	a								-1	-21.6	6.6	5.4		1	21.6	6.6	5.4
mg_nh3-2-dep_P1	rMgN	1	2	x	x	2.104	2.119	2.049	2.115	2.063	rMgN	r								0.015	-0.055	0.011	-0.041		0.015	0.055	0.011	0.041
mg_nh3-2-dep_P1	rMgN	1	8	x	x	1.849	1.865	1.886	1.873	1.841	rMgN	r								0.016	0.037	0.024	-0.008		0.016	0.037	0.024	0.008
mg_nh3-2-dep_P1	rHN	2	3	x	x	1.021	1.025	1.027	1.03	1.02	rHN	r								0.004	0.006	0.009	-0.001		0.004	0.006	0.009	0.001
mg_nh3-2-dep_P1	rHN	6	8	x	x	1.01	1.014	1.011	1.024	1.014	rHN	r								0.004	0.001	0.014	0.004		0.004	0.001	0.014	0.004
mg_nh3-2-dep_P1	aNMgN	2	1	8	x	179.8	179.9	166.4	180	180	aNMgN	a								0.1	-13.4	0.2	0.2		0.1	13.4	0.2	0.2
mg_nh3-2-dep_P1	aHNMg	3	2	1	x	113.4	113.4	112.9	111.8	112.6	aHNMg	a								0	-0.5	-1.6	-0.8		0	0.5	1.6	0.8
mg_nh3-2-dep_P1	aHNMg	6	8	1	x	126	125.9	115.9	125.1	125.9	aHNMg	a								-0.1	-10.1	-0.9	-0.1		0.1	10.1	0.9	0.1
mg_nh3-3-dep_P1	rMgN	1	2	x	x	2.137	2.152	2.107	2.144	2.095	rMgN	r								0.015	-0.03	0.007	-0.042		0.015	0.03	0.007	0.042
mg_nh3-3-dep_P1	rMgN	1	9	x	x	2.137	2.152	2.108	2.144	2.095	rMgN	r								0.015	-0.029	0.007	-0.042		0.015	0.029	0.007	0.042
mg_nh3-3-dep_P1	rMgN	1	12	x	x	1.873	1.888	1.897	1.887	1.859	rMgN	r								0.015	0.024	0.014	-0.014		0.015	0.024	0.014	0.014
mg_nh3-3-dep_P1	aNMgN	2	1	9	x	115.3	114.9	105.3	117.4	118.2	aNMgN	a								-0.4	-10	2.1	2.9		0.4	10	2.1	2.9
mg_nh3-3-dep_P1	aNMgN	2	1	12	x	122.3	122.6	126.5	121.3	120.9	aNMgN	a								0.3	4.2	-1	-1.4		0.3	4.2	1	1.4
mg_nh3-3-dep_P1	aNMgN	9	1	12	x	122.3	122.6	126.3	121.3	120.9	aNMgN	a								0.3	4	-1	-1.4		0.3	4	1	1.4
mg_nh3-4-dep_P1	rMgN	1	2	x	x	2.176	2.188	2.156	2.2	2.16	rMgN	r								0.012	-0.02	0.024	-0.016		0.012	0.02	0.024	0.016
mg_nh3-4-dep_P1	rMgN	1	3	x	x	2.174	2.186	2.152	2.176	2.13	rMgN	r								0.012	-0.022	0.002	-0.044		0.012	0.022	0.002	0.044
mg_nh3-4-dep_P1	rMgN	1	4	x	x	1.907	1.923	1.922	1.928	1.908	rMgN	r								0.016	0.015	0.021	0.001		0.016	0.015	0.021	0.001
mg_nh3-4-dep_P1	rMgN	1	5	x	x	2.175	2.186	2.156	2.175	2.129	rMgN	r								0.011	-0.019	0	-0.046		0.011	0.019	0	0.046
mg_nh3-4-dep_P1	aNMgN	2	1	3	x	107.1	107.1	103.8	105.4	105.8	aNMgN	a								0	-3.3	-1.7	-1.3		0	3.3	1.7	1.3
mg_nh3-4-dep_P1	aNMgN	2	1	4	x	117.6	118.1	120.9	112.1	112.3	aNMgN	a								0.5	3.3	-5.5	-5.3		0.5	3.3	5.5	5.3
mg_nh3-4-dep_P1	aNMgN	2	1	5	x	106.8	106.9	102.5	105.6	106.1	aNMgN	a								0.1	-4.3	-1.2	-0.7		0.1	4.3	1.2	0.7
mg_nh3-4-dep_P1	aNMgN	3	1	4	x	108.2	108.2	102.4	110.9	110.2	aNMgN	a								0	-5.8	2.7	2		0	5.8	2.7	2
mg_nh3-4-dep_P1	aNMgN	3	1	5	x	108.4	107.9	103.9	111.8	112.2	aNMgN	a								-0.5	-4.5	3.4	3.8		0.5	4.5	3.4	3.8
mg_nh3-4-dep_P1	aNMgN	4	1	5	x	108.4	108.3	120.9	110.8	110.1	aNMgN	a								-0.1	12.5	2.4	1.7		0.1	12.5	2.4	1.7
mg_nh3-5-dep_P1	rMgN	1	2	x	x	1.938	1.953	1.955	1.946	1.931	rMgN	r								0.015	0.017	0.008	-0.007		0.015	0.017	0.008	0.007
mg_nh3-5-dep_P1	rMgN	1	5	x	x	2.289	2.291	2.271	2.296	2.266	rMgN	r								0.002	-0.018	0.007	-0.023		0.002	0.018	0.007	0.023
mg_nh3-5-dep_P1	rMgN	1	8	x	x	2.218	2.225	2.192	2.254	2.21	rMgN	r								0.007	-0.026	0.036	-0.008		0.007	0.026	0.036	0.008
mg_nh3-5-dep_P1	rMgN	1	11	x	x	2.218	2.225	2.194	2.254	2.21	rMgN	r								0.007	-0.024	0.036	-0.008		0.007	0.024	0.036	0.008
mg_nh3-5-dep_P1	rMgN	1	14	x	x	2.289	2.291	2.271	2.296	2.266	rMgN	r								0.002	-0.018	0.007	-0.023		0.002	0.018	0.007	0.023
mg_nh3-5-dep_P1	aNMgN	2	1	5	x	89.6	89.6	93.1	96.3	93.8	aNMgN	a								0	3.5	6.7	4.2		0	3.5	6.7	4.2
mg_nh3-5-dep_P1	aNMgN	2	1	8	x	122.6	122.2	107.6	116.8	117.7	aNMgN	a								-0.4	-15	-5.8	-4.9		0.4	15	5.8	4.9
mg_nh3-5-dep_P1	aNMgN	2	1	11	x	122.5	122.2	142.7	116.8	117.7	aNMgN	a								-0.3	20.2	-5.7	-4.8		0.3	20.2	5.7	4.8
mg_nh3-5-dep_P1	aNMgN	2	1	14	x	89.6	89.6	93.1	96.3	93.8	aNMgN	a								0	3.5	6.7	4.2		0	3.5	6.7	4.2
mg_nh3-5-dep_P1	aNMgN	5	1	8	x	90.2	90.2	90.2	87.2	88.2	aNMgN	a								0	0	-3	-2		0	0	3	2
mg_nh3-5-dep_P1	aNMgN	5	1	11	x	90.2	90.2	86.9	87.2	88.2	aNMgN	a								0	-3.3	-3	-2		0	3.3	3	2
mg_nh3-5-dep_P1	aNMgN	5	1	14	x	179.2	179.2	173.4	167.3	172.4	aNMgN	a								0	-5.8	-11.9	-6.8		0	5.8	11.9	6.8
mg_nh3-5-dep_P1	aNMgN	8	1	11	x	114.9	115.5	109.7	126.4	124.6	aNMgN	a								0.6	-5.2	11.5	9.7		0.6	5.2	11.5	9.7
mg_nh3-5-dep_P1	aNMgN	8	1	14	x	90.2	90.2	90.2	87.1	88.2	aNMgN	a								0	0	-3.1	-2		0	0	3.1	2
mg_nh3-5-dep_P1	aNMgN	11	1	14	x	90.2	90.2	86.8	87.1	88.2	aNMgN	a								0	-3.4	-3.1	-2		0	3.4	3.1	2
mg_nh3-6-dep_P1	rMgN	1	2	x	x	2.301	2.301	2.291	2.313	2.28	rMgN	r								0	-0.01	0.012	-0.021		0	0.01	0.012	0.021
mg_nh3-6-dep_P1	rMgN	1	5	x	x	2.023	2.042	1.998	1.963	1.985	rMgN	r								0.019	-0.025	-0.06	-0.038		0.019	0.025	0.06	0.038
mg_nh3-6-dep_P1	rMgN	1	7	x	x	2.293	2.296	2.304	2.273	2.281	rMgN	r								0.003	0.011	-0.02	-0.012		0.003	0.011	0.02	0.012
mg_nh3-6-dep_P1	rMgN	1	10	x	x	2.317	2.317	2.293	2.322	2.283	rMgN	r								0	-0.024	0.005	-0.034		0	0.024	0.005	0.034
mg_nh3-6-dep_P1	rMgN	1	13	x	x	2.266	2.266	2.226	2.747	2.317	rMgN	r								0	-0.04	0.481	0.051		0	0.04	0.481	0.051
mg_nh3-6-dep_P1	rMgN	1	16	x	x	2.292	2.297	2.304	2.274	2.281	rMgN	r								0.005	0.012	-0.018	-0.011		0.005	0.012	0.018	0.011
mg_nh3-6-dep_P1	aNMgN	2	1	5	x	88.8	88.2	96	100.7	92.3	aNMgN	a								-0.6	7.2	11.9	3.5		0.6	7.2	11.9	3.5
mg_nh3-6-dep_P1	aNMgN	2	1	7	x	91.7	91.8	91.4	89.4	89.8	aNMgN	a								0.1	-0.3	-2.3	-1.9		0.1	0.3	2.3	1.9
mg_nh3-6-dep_P1	aNMgN	2	1	10	x	175.9	174.5	177.2	159.7	175.7	aNMgN	a								-1.4	1.3	-16.2	-0.2		1.4	1.3	16.2	0.2
mg_nh3-6-dep_P1	aNMgN	2	1	13	x	91.5	92.2	88.3	79.2	87.5	aNMgN	a								0.7	-3.2	-12.3	-4		0.7	3.2	12.3	4
mg_nh3-6-dep_P1	aNMgN	2	1	16	x	91.7	91.8	91.4	89.4	90.6	aNMgN	a								0.1	-0.3	-2.3	-1.1		0.1	0.3	2.3	1.1
mg_nh3-6-dep_P1	aNMgN	5	1	7	x	90	89.9	92.7	98.8	92.1	aNMgN	a								-0.1	2.7	8.8	2.1		0.1	2.7	8.8	2.1
mg_nh3-6-dep_P1	aNMgN	5	1	10	x	87.1	86.3	86.7	99.6	92.1	aNMgN	a								-0.8	-0.4	12.5	5		0.8	0.4	12.5	5
mg_nh3-6-dep_P1	aNMgN	5	1	13	x	179.6	179.6	175.6	179.9	179.7	aNMgN	a								0	-4	0.3	0.1		0	4	0.3	0.1
mg_nh3-6-dep_P1	aNMgN	5	1	16	x	90.3	90.1	92.9	98.7	92.2	aNMgN	a								-0.2	2.6	8.4	1.9		0.2	2.6	8.4	1.9
mg_nh3-6-dep_P1	aNMgN	7	1	10	x	88.2	88	88.4	87.5	90	aNMgN	a								-0.2	0.2	-0.7	1.8		0.2	0.2	0.7	1.8
mg_nh3-6-dep_P1	aNMgN	7	1	13	x	89.7	90	87.1	81.2	87.9	aNMgN	a								0.3	-2.6	-8.5	-1.8		0.3	2.6	8.5	1.8
mg_nh3-6-dep_P1	aNMgN	7	1	16	x	176.5	176.3	173.4	162.3	175.7	aNMgN	a								-0.2	-3.1	-14.2	-0.8		0.2	3.1	14.2	0.8
mg_nh3-6-dep_P1	aNMgN	10	1	13	x	92.6	93.4	88.9	80.5	88.2	aNMgN	a								0.8	-3.7	-12.1	-4.4		0.8	3.7	12.1	4.4
mg_nh3-6-dep_P1	aNMgN	10	1	16	x	88.4	88.3	88.5	87.5	89.3	aNMgN	a								-0.1	0.1	-0.9	0.9		0.1	0.1	0.9	0.9
mg_nh3-6-dep_P1	aNMgN	13	1	16	x	89.9	90	87.1	81.2	87.9	aNMgN	a								0.1	-2.8	-8.7	-2		0.1	2.8	8.7	2
mg_sh2-2-dep_P1	rMgS	1	2	x	x	2.248	2.257	2.065	2.254	2.232	rMgS	r								0.009	-0.183	0.006	-0.016		0.009	0.183	0.006	0.016
mg_sh2-2-dep_P1	rMgS	1	3	x	x	2.548	2.555	2.26	2.524	2.592	rMgS	r								0.007	-0.288	-0.024	0.044		0.007	0.288	0.024	0.044
mg_sh2-2-dep_P1	rHS	4	3	x	x	1.352	1.353	1.353	1.349	1.346	rHS	r								0.001	0.001	-0.003	-0.006		0.001	0.001	0.003	0.006
mg_sh2-2-dep_P1	rHS	5	3	x	x	1.352	1.353	1.353	1.349	1.346	rHS	r								0.001	0.001	-0.003	-0.006		0.001	0.001	0.003	0.006
mg_sh2-2-dep_P1	rHS	6	2	x	x	1.351	1.353	1.36	1.346	1.341	rHS	r								0.002	0.009	-0.005	-0.01		0.002	0.009	0.005	0.01
mg_sh2-2-dep_P1	aHSMg	6	2	1	x	93	93.2	100.8	108.7	110.8	aHSMg	a								0.2	7.8	15.7	17.8		0.2	7.8	15.7	17.8
mg_sh2-2-dep_P1	aHSMg	4	3	1	x	98.5	100.3	109.4	110.2	109.8	aHSMg	a								1.8	10.9	11.7	11.3		1.8	10.9	11.7	11.3
mg_sh2-2-dep_P1	aSMgS	2	1	3	x	174.4	174.1	173.3	159.7	156.8	aSMgS	a								-0.3	-1.1	-14.7	-17.6		0.3	1.1	14.7	17.6
mg_sh2-3-dep_P1	rMgS	1	2	x	x	2.267	2.274	2.1	2.27	2.254	rMgS	r								0.007	-0.167	0.003	-0.013		0.007	0.167	0.003	0.013
mg_sh2-3-dep_P1	rMgS	1	3	x	x	2.593	2.597	2.348	2.571	2.633	rMgS	r								0.004	-0.245	-0.022	0.04		0.004	0.245	0.022	0.04
mg_sh2-3-dep_P1	rMgS	1	4	x	x	2.591	2.595	2.344	2.558	2.621	rMgS	r								0.004	-0.247	-0.033	0.03		0.004	0.247	0.033	0.03
mg_sh2-3-dep_P1	aSMgS	2	1	3	x	133.2	135.1	124	137.5	137.5	aSMgS	a								1.9	-9.2	4.3	4.3		1.9	9.2	4.3	4.3
mg_sh2-3-dep_P1	aSMgS	2	1	4	x	121.2	120.5	123.6	116.7	116.1	aSMgS	a								-0.7	2.4	-4.5	-5.1		0.7	2.4	4.5	5.1
mg_sh2-3-dep_P1	aSMgS	3	1	4	x	105.5	104.4	111.7	105.9	106.4	aSMgS	a								-1.1	6.2	0.4	0.9		1.1	6.2	0.4	0.9
mg_sh2-4-dep_P1	rMgS	1	2	x	x	2.638	2.638	2.422	2.608	2.664	rMgS	r								0	-0.216	-0.03	0.026		0	0.216	0.03	0.026
mg_sh2-4-dep_P1	rMgS	1	3	x	x	2.638	2.635	2.423	2.604	2.662	rMgS	r								-0.003	-0.215	-0.034	0.024		0.003	0.215	0.034	0.024
mg_sh2-4-dep_P1	rMgS	1	4	x	x	2.295	2.3	2.135	2.298	2.297	rMgS	r								0.005	-0.16	0.003	0.002		0.005	0.16	0.003	0.002
mg_sh2-4-dep_P1	rMgS	1	5	x	x	2.638	2.634	2.432	2.59	2.647	rMgS	r								-0.004	-0.206	-0.048	0.009		0.004	0.206	0.048	0.009
mg_sh2-4-dep_P1	aSMgS	2	1	3	x	102.5	101.6	106.1	100	100.4	aSMgS	a								-0.9	3.6	-2.5	-2.1		0.9	3.6	2.5	2.1
mg_sh2-4-dep_P1	aSMgS	2	1	4	x	116.7	118.5	116.4	120.9	120.5	aSMgS	a								1.8	-0.3	4.2	3.8		1.8	0.3	4.2	3.8
mg_sh2-4-dep_P1	aSMgS	2	1	5	x	104.5	103.5	104	102	103.1	aSMgS	a								-1	-0.5	-2.5	-1.4		1	0.5	2.5	1.4
mg_sh2-4-dep_P1	aSMgS	3	1	4	x	119.2	119.9	114.9	122.9	121.7	aSMgS	a								0.7	-4.3	3.7	2.5		0.7	4.3	3.7	2.5
mg_sh2-4-dep_P1	aSMgS	3	1	5	x	102.5	102.2	104.3	104	103.9	aSMgS	a								-0.3	1.8	1.5	1.4		0.3	1.8	1.5	1.4
mg_sh2-4-dep_P1	aSMgS	4	1	5	x	109.6	108.9	110	104.3	104.9	aSMgS	a								-0.7	0.4	-5.3	-4.7		0.7	0.4	5.3	4.7
mg_sh2-5-dep_P1	rMgS	1	11	x	x	2.771	2.772	2.423	2.702	2.746	rMgS	r								0.001	-0.348	-0.069	-0.025		0.001	0.348	0.069	0.025
mg_sh2-5-dep_P1	rMgS	1	12	x	x	2.677	2.671	2.415	2.644	2.697	rMgS	r								-0.006	-0.262	-0.033	0.02		0.006	0.262	0.033	0.02
mg_sh2-5-dep_P1	rMgS	1	13	x	x	2.665	2.664	2.425	2.629	2.694	rMgS	r								-0.001	-0.24	-0.036	0.029		0.001	0.24	0.036	0.029
mg_sh2-5-dep_P1	rMgS	1	14	x	x	2.864	2.864	3.958	2.768	2.739	rMgS	r								0	1.094	-0.096	-0.125		0	1.094	0.096	0.125
mg_sh2-5-dep_P1	rMgS	1	15	x	x	2.315	2.321	2.145	2.316	2.337	rMgS	r								0.006	-0.17	0.001	0.022		0.006	0.17	0.001	0.022
mg_sh2-5-dep_P1	aSMgS	11	1	12	x	87.4	87.6	106.8	86.6	85.7	aSMgS	a								0.2	19.4	-0.8	-1.7		0.2	19.4	0.8	1.7
mg_sh2-5-dep_P1	aSMgS	11	1	13	x	89.1	88.4	104.6	87.4	86.2	aSMgS	a								-0.7	15.5	-1.7	-2.9		0.7	15.5	1.7	2.9
mg_sh2-5-dep_P1	aSMgS	11	1	14	x	170.2	168.7	171.5	159.6	164.3	aSMgS	a								-1.5	1.3	-10.6	-5.9		1.5	1.3	10.6	5.9
mg_sh2-5-dep_P1	aSMgS	11	1	15	x	104.6	105.2	113.8	108	105.1	aSMgS	a								0.6	9.2	3.4	0.5		0.6	9.2	3.4	0.5
mg_sh2-5-dep_P1	aSMgS	12	1	13	x	111.3	111.7	104.7	120.3	117.9	aSMgS	a								0.4	-6.6	9	6.6		0.4	6.6	9	6.6
mg_sh2-5-dep_P1	aSMgS	12	1	14	x	88.1	87	70.1	82.4	85.6	aSMgS	a								-1.1	-18	-5.7	-2.5		1.1	18	5.7	2.5
mg_sh2-5-dep_P1	aSMgS	12	1	15	x	120.7	120.5	115.4	129.1	120.8	aSMgS	a								-0.2	-5.3	8.4	0.1		0.2	5.3	8.4	0.1
mg_sh2-5-dep_P1	aSMgS	13	1	14	x	84.5	84.4	69.3	83.4	86.2	aSMgS	a								-0.1	-15.2	-1.1	1.7		0.1	15.2	1.1	1.7
mg_sh2-5-dep_P1	aSMgS	13	1	15	x	126.4	126.2	110.6	109.1	120.8	aSMgS	a								-0.2	-15.8	-17.3	-5.6		0.2	15.8	17.3	5.6
mg_sh2-5-dep_P1	aSMgS	14	1	15	x	85.2	86.1	74.4	92.2	90.7	aSMgS	a								0.9	-10.8	7	5.5		0.9	10.8	7	5.5
mg_sh2-6-dep_P1	rMgS	1	13	x	x	2.775	2.769	4.158	2.747	2.746	rMgS	r								-0.006	1.383	-0.028	-0.029		0.006	1.383	0.028	0.029
mg_sh2-6-dep_P1	rMgS	1	14	x	x	2.777	2.776	2.409	2.696	2.746	rMgS	r								-0.001	-0.368	-0.081	-0.031		0.001	0.368	0.081	0.031
mg_sh2-6-dep_P1	rMgS	1	15	x	x	2.797	2.803	2.422	2.77	2.734	rMgS	r								0.006	-0.375	-0.027	-0.063		0.006	0.375	0.027	0.063
mg_sh2-6-dep_P1	rMgS	1	16	x	x	2.826	2.799	2.437	2.717	2.741	rMgS	r								-0.027	-0.389	-0.109	-0.085		0.027	0.389	0.109	0.085
mg_sh2-6-dep_P1	rMgS	1	17	x	x	2.354	2.359	2.148	2.338	2.419	rMgS	r								0.005	-0.206	-0.016	0.065		0.005	0.206	0.016	0.065
mg_sh2-6-dep_P1	rMgS	1	18	x	x	2.791	2.787	3.978	2.761	2.749	rMgS	r								-0.004	1.187	-0.03	-0.042		0.004	1.187	0.03	0.042
mg_sh2-6-dep_P1	aSMgS	13	1	14	x	94.9	95.5	64.3	104	97.9	aSMgS	a								0.6	-30.6	9.1	3		0.6	30.6	9.1	3
mg_sh2-6-dep_P1	aSMgS	13	1	15	x	84.6	83.2	75.6	81.3	85.2	aSMgS	a								-1.4	-9	-3.3	0.6		1.4	9	3.3	0.6
mg_sh2-6-dep_P1	aSMgS	13	1	16	x	165.9	165.4	168.8	156.9	169.3	aSMgS	a								-0.5	2.9	-9	3.4		0.5	2.9	9	3.4
mg_sh2-6-dep_P1	aSMgS	13	1	17	x	104.6	104.5	80.3	88.7	87.1	aSMgS	a								-0.1	-24.3	-15.9	-17.5		0.1	24.3	15.9	17.5
mg_sh2-6-dep_P1	aSMgS	13	1	18	x	92	92.4	120.8	82.2	86.1	aSMgS	a								0.4	28.8	-9.8	-5.9		0.4	28.8	9.8	5.9
mg_sh2-6-dep_P1	aSMgS	14	1	15	x	84	83	105.3	79.4	84.1	aSMgS	a								-1	21.3	-4.6	0.1		1	21.3	4.6	0.1
mg_sh2-6-dep_P1	aSMgS	14	1	16	x	86.9	84.8	105.5	86.2	87.3	aSMgS	a								-2.1	18.6	-0.7	0.4		2.1	18.6	0.7	0.4
mg_sh2-6-dep_P1	aSMgS	14	1	17	x	92.6	93.3	116.6	109.2	95.9	aSMgS	a								0.7	24	16.6	3.3		0.7	24	16.6	3.3
mg_sh2-6-dep_P1	aSMgS	14	1	18	x	170.4	168.5	170.4	157.7	170.2	aSMgS	a								-1.9	0	-12.7	-0.2		1.9	0	12.7	0.2
mg_sh2-6-dep_P1	aSMgS	15	1	16	x	81.7	82.4	104.3	80.3	86.1	aSMgS	a								0.7	22.6	-1.4	4.4		0.7	22.6	1.4	4.4
mg_sh2-6-dep_P1	aSMgS	15	1	17	x	170.5	171.8	114.8	168.2	172.2	aSMgS	a								1.3	-55.7	-2.3	1.7		1.3	55.7	2.3	1.7
mg_sh2-6-dep_P1	aSMgS	15	1	18	x	90	89.6	70	80.5	87.4	aSMgS	a								-0.4	-20	-9.5	-2.6		0.4	20	9.5	2.6
mg_sh2-6-dep_P1	aSMgS	16	1	17	x	89.3	90	109.3	107.8	101.7	aSMgS	a								0.7	20	18.5	12.4		0.7	20	18.5	12.4
mg_sh2-6-dep_P1	aSMgS	16	1	18	x	84.8	85.5	68.7	81.1	87.4	aSMgS	a								0.7	-16.1	-3.7	2.6		0.7	16.1	3.7	2.6
mg_sh2-6-dep_P1	aSMgS	17	1	18	x	92.1	92.8	72.8	92.2	93.2	aSMgS	a								0.7	-19.3	0.1	1.1		0.7	19.3	0.1	1.1
mg_ph3-2-dep_P1	rMgP	2	1	x	x	2.422	2.428	2.373	2.428	2.466	rMgP	r								0.006	-0.049	0.006	0.044		0.006	0.049	0.006	0.044
mg_ph3-2-dep_P1	rMgP	2	6	x	x	2.663	2.671	2.47	2.656	2.66	rMgP	r								0.008	-0.193	-0.007	-0.003		0.008	0.193	0.007	0.003
mg_ph3-2-dep_P1	rHP	7	1	x	x	1.427	1.429	1.454	1.422	1.419	rHP	r								0.002	0.027	-0.005	-0.008		0.002	0.027	0.005	0.008
mg_ph3-2-dep_P1	rHP	3	6	x	x	1.407	1.409	1.452	1.413	1.41	rHP	r								0.002	0.045	0.006	0.003		0.002	0.045	0.006	0.003
mg_ph3-2-dep_P1	aPMgP	1	2	6	x	174.1	174.2	171.7	163.5	160.2	aPMgP	a								0.1	-2.4	-10.6	-13.9		0.1	2.4	10.6	13.9
mg_ph3-2-dep_P1	aHPMg	7	1	2	x	89.4	89.6	100.8	99.8	100.8	aHPMg	a								0.2	11.4	10.4	11.4		0.2	11.4	10.4	11.4
mg_ph3-2-dep_P1	aHPMg	3	6	2	x	116.8	116.8	112.5	117.3	116.9	aHPMg	a								0	-4.3	0.5	0.1		0	4.3	0.5	0.1
mg_ph3-3-dep_P1	rMgP	2	1	x	x	2.431	2.435	2.372	2.429	2.467	rMgP	r								0.004	-0.059	-0.002	0.036		0.004	0.059	0.002	0.036
mg_ph3-3-dep_P1	rMgP	2	6	x	x	2.699	2.708	2.611	2.696	2.681	rMgP	r								0.009	-0.088	-0.003	-0.018		0.009	0.088	0.003	0.018
mg_ph3-3-dep_P1	rMgP	2	10	x	x	2.697	2.706	2.623	2.696	2.681	rMgP	r								0.009	-0.074	-0.001	-0.016		0.009	0.074	0.001	0.016
mg_ph3-3-dep_P1	aPMgP	2	1	6	x	28	28	21.5	29	29.4	aPMgP	a								0	-6.5	1	1.4		0	6.5	1	1.4
mg_ph3-3-dep_P1	aPMgP	2	1	10	x	28	28.1	32	28.9	29.3	aPMgP	a								0.1	4	0.9	1.3		0.1	4	0.9	1.3
mg_ph3-3-dep_P1	aPMgP	6	1	10	x	55.8	55.8	53.5	56.9	57.4	aPMgP	a								0	-2.3	1.1	1.6		0	2.3	1.1	1.6
mg_ph3-4-dep_P1	rMgP	1	2	x	x	2.715	2.721	4.129	2.758	2.706	rMgP	r								0.006	1.414	0.043	-0.009		0.006	1.414	0.043	0.009
mg_ph3-4-dep_P1	rMgP	1	3	x	x	2.718	2.723	2.606	2.722	2.693	rMgP	r								0.005	-0.112	0.004	-0.025		0.005	0.112	0.004	0.025
mg_ph3-4-dep_P1	rMgP	1	4	x	x	2.455	2.459	2.37	2.449	2.475	rMgP	r								0.004	-0.085	-0.006	0.02		0.004	0.085	0.006	0.02
mg_ph3-4-dep_P1	rMgP	1	5	x	x	2.718	2.723	2.606	2.722	2.693	rMgP	r								0.005	-0.112	0.004	-0.025		0.005	0.112	0.004	0.025
mg_ph3-4-dep_P1	aPMgP	2	1	3	x	102.8	103.1	69.9	102.5	104.4	aPMgP	a								0.3	-32.9	-0.3	1.6		0.3	32.9	0.3	1.6
mg_ph3-4-dep_P1	aPMgP	2	1	4	x	119.7	120.5	131.8	120.2	120.1	aPMgP	a								0.8	12.1	0.5	0.4		0.8	12.1	0.5	0.4
mg_ph3-4-dep_P1	aPMgP	2	1	5	x	102.8	103.1	69.9	102.5	104.4	aPMgP	a								0.3	-32.9	-0.3	1.6		0.3	32.9	0.3	1.6
mg_ph3-4-dep_P1	aPMgP	3	1	4	x	113.4	112.9	128.6	113.5	111.2	aPMgP	a								-0.5	15.2	0.1	-2.2		0.5	15.2	0.1	2.2
mg_ph3-4-dep_P1	aPMgP	3	1	5	x	102.6	102.4	101.6	102.4	104.1	aPMgP	a								-0.2	-1	-0.2	1.5		0.2	1	0.2	1.5
mg_ph3-4-dep_P1	aPMgP	4	1	5	x	113.5	112.9	128.7	113.5	111.2	aPMgP	a								-0.6	15.2	0	-2.3		0.6	15.2	0	2.3
mg_h2o-3_ch3oh-1_P2	rMgO	2	1	x	x	2.005	2.024	1.986	2.017	1.993	rMgO	r								0.019	-0.019	0.012	-0.012		0.019	0.019	0.012	0.012
mg_h2o-3_ch3oh-1_P2	rMgO	2	3	x	x	2.007	2.024	1.986	2.018	1.994	rMgO	r								0.017	-0.021	0.011	-0.013		0.017	0.021	0.011	0.013
mg_h2o-3_ch3oh-1_P2	rMgO	2	4	x	x	2.005	2.024	1.989	2.016	1.991	rMgO	r								0.019	-0.016	0.011	-0.014		0.019	0.016	0.011	0.014
mg_h2o-3_ch3oh-1_P2	rMgO	2	12	x	x	1.973	1.991	1.935	1.996	1.97	rMgO	r								0.018	-0.038	0.023	-0.003		0.018	0.038	0.023	0.003
mg_h2o-3_ch3oh-1_P2	aOMgO	1	2	3	x	109.2	109.7	109.7	109	108.7	aOMgO	a								0.5	0.5	-0.2	-0.5		0.5	0.5	0.2	0.5
mg_h2o-3_ch3oh-1_P2	aOMgO	1	2	4	x	105.6	105.3	106.4	107.9	107.8	aOMgO	a								-0.3	0.8	2.3	2.2		0.3	0.8	2.3	2.2
mg_h2o-3_ch3oh-1_P2	aOMgO	1	2	12	x	111.2	111.6	113.1	110.1	110.3	aOMgO	a								0.4	1.9	-1.1	-0.9		0.4	1.9	1.1	0.9
mg_h2o-3_ch3oh-1_P2	aOMgO	3	2	4	x	108.4	108.2	106.8	108.5	108.6	aOMgO	a								-0.2	-1.6	0.1	0.2		0.2	1.6	0.1	0.2
mg_h2o-3_ch3oh-1_P2	aOMgO	3	2	12	x	107.5	107.6	107.3	109.2	109.3	aOMgO	a								0.1	-0.2	1.7	1.8		0.1	0.2	1.7	1.8
mg_h2o-3_ch3oh-1_P2	aOMgO	4	2	12	x	114.7	114.3	113.3	112	112	aOMgO	a								-0.4	-1.4	-2.7	-2.7		0.4	1.4	2.7	2.7
mg_h2o-4_ch3oh-1_P2	rMgO	2	1	x	x	2.1	2.114	2.045	2.124	2.103	rMgO	r								0.014	-0.055	0.024	0.003		0.014	0.055	0.024	0.003
mg_h2o-4_ch3oh-1_P2	rMgO	2	3	x	x	2.041	2.055	2.018	2.058	2.035	rMgO	r								0.014	-0.023	0.017	-0.006		0.014	0.023	0.017	0.006
mg_h2o-4_ch3oh-1_P2	rMgO	2	4	x	x	2.041	2.055	2.016	2.058	2.035	rMgO	r								0.014	-0.025	0.017	-0.006		0.014	0.025	0.017	0.006
mg_h2o-4_ch3oh-1_P2	rMgO	2	5	x	x	2.046	2.06	2.009	2.066	2.048	rMgO	r								0.014	-0.037	0.02	0.002		0.014	0.037	0.02	0.002
mg_h2o-4_ch3oh-1_P2	rMgO	2	15	x	x	2.054	2.069	1.998	2.074	2.066	rMgO	r								0.015	-0.056	0.02	0.012		0.015	0.056	0.02	0.012
mg_h2o-4_ch3oh-1_P2	aOMgO	1	2	3	x	87	87	94.6	88.4	88.7	aOMgO	a								0	7.6	1.4	1.7		0	7.6	1.4	1.7
mg_h2o-4_ch3oh-1_P2	aOMgO	1	2	4	x	87	87	73.8	88.4	88.7	aOMgO	a								0	-13.2	1.4	1.7		0	13.2	1.4	1.7
mg_h2o-4_ch3oh-1_P2	aOMgO	1	2	5	x	94.8	94.8	109.7	90.2	90	aOMgO	a								0	14.9	-4.6	-4.8		0	14.9	4.6	4.8
mg_h2o-4_ch3oh-1_P2	aOMgO	1	2	15	x	168	168	138.9	177.6	178.6	aOMgO	a								0	-29.1	9.6	10.6		0	29.1	9.6	10.6
mg_h2o-4_ch3oh-1_P2	aOMgO	3	2	4	x	144.5	144.5	158.2	125.7	124.6	aOMgO	a								0	13.7	-18.8	-19.9		0	13.7	18.8	19.9
mg_h2o-4_ch3oh-1_P2	aOMgO	3	2	5	x	107.7	107.7	101.3	117.1	117.7	aOMgO	a								0	-6.4	9.4	10		0	6.4	9.4	10
mg_h2o-4_ch3oh-1_P2	aOMgO	3	2	15	x	89.3	89.3	74.2	90.5	90.6	aOMgO	a								0	-15.1	1.2	1.3		0	15.1	1.2	1.3
mg_h2o-4_ch3oh-1_P2	aOMgO	4	2	5	x	107.7	107.7	100	117.1	117.7	aOMgO	a								0	-7.7	9.4	10		0	7.7	9.4	10
mg_h2o-4_ch3oh-1_P2	aOMgO	4	2	15	x	89.3	89.3	102.2	90.5	90.6	aOMgO	a								0	12.9	1.2	1.3		0	12.9	1.2	1.3
mg_h2o-4_ch3oh-1_P2	aOMgO	5	2	15	x	97.2	97.2	111.3	92.2	91.4	aOMgO	a								0	14.1	-5	-5.8		0	14.1	5	5.8
mg_h2o-5_ch3oh-1_P2	rMgO	2	1	x	x	2.11	2.121	2.037	2.14	2.115	rMgO	r								0.011	-0.073	0.03	0.005		0.011	0.073	0.03	0.005
mg_h2o-5_ch3oh-1_P2	rMgO	2	3	x	x	2.102	2.114	2.057	2.13	2.109	rMgO	r								0.012	-0.045	0.028	0.007		0.012	0.045	0.028	0.007
mg_h2o-5_ch3oh-1_P2	rMgO	2	4	x	x	2.103	2.114	2.067	2.13	2.108	rMgO	r								0.011	-0.036	0.027	0.005		0.011	0.036	0.027	0.005
mg_h2o-5_ch3oh-1_P2	rMgO	2	5	x	x	2.116	2.127	2.084	2.143	2.119	rMgO	r								0.011	-0.032	0.027	0.003		0.011	0.032	0.027	0.003
mg_h2o-5_ch3oh-1_P2	rMgO	2	6	x	x	2.099	2.111	2.036	2.124	2.102	rMgO	r								0.012	-0.063	0.025	0.003		0.012	0.063	0.025	0.003
mg_h2o-5_ch3oh-1_P2	rMgO	2	18	x	x	2.076	2.088	2.022	2.082	2.079	rMgO	r								0.012	-0.054	0.006	0.003		0.012	0.054	0.006	0.003
mg_h2o-5_ch3oh-1_P2	aOMgO	1	2	3	x	89.1	89.1	90.5	89	89.3	aOMgO	a								0	1.4	-0.1	0.2		0	1.4	0.1	0.2
mg_h2o-5_ch3oh-1_P2	aOMgO	1	2	4	x	89.3	89.3	101.9	89	89.3	aOMgO	a								0	12.6	-0.3	0		0	12.6	0.3	0
mg_h2o-5_ch3oh-1_P2	aOMgO	1	2	5	x	88.6	88.7	73.8	87.7	88.4	aOMgO	a								0.1	-14.8	-0.9	-0.2		0.1	14.8	0.9	0.2
mg_h2o-5_ch3oh-1_P2	aOMgO	1	2	6	x	88	87.9	105.2	88.5	88.7	aOMgO	a								-0.1	17.2	0.5	0.7		0.1	17.2	0.5	0.7
mg_h2o-5_ch3oh-1_P2	aOMgO	1	2	18	x	176.8	176.8	148.9	176.7	177	aOMgO	a								0	-27.9	-0.1	0.2		0	27.9	0.1	0.2
mg_h2o-5_ch3oh-1_P2	aOMgO	3	2	4	x	178.4	178.4	147.2	178	178.6	aOMgO	a								0	-31.2	-0.4	0.2		0	31.2	0.4	0.2
mg_h2o-5_ch3oh-1_P2	aOMgO	3	2	5	x	90.1	90.1	104.1	90	89.9	aOMgO	a								0	14	-0.1	-0.2		0	14	0.1	0.2
mg_h2o-5_ch3oh-1_P2	aOMgO	3	2	6	x	89.8	89.8	74	90	90.1	aOMgO	a								0	-15.8	0.2	0.3		0	15.8	0.2	0.3
mg_h2o-5_ch3oh-1_P2	aOMgO	3	2	18	x	90.9	90.9	109.7	91	90.7	aOMgO	a								0	18.8	0.1	-0.2		0	18.8	0.1	0.2
mg_h2o-5_ch3oh-1_P2	aOMgO	4	2	5	x	89.9	89.9	108.6	90	89.9	aOMgO	a								0	18.7	0.1	0		0	18.7	0.1	0
mg_h2o-5_ch3oh-1_P2	aOMgO	4	2	6	x	90.1	90.1	73.5	90	90.1	aOMgO	a								0	-16.6	-0.1	0		0	16.6	0.1	0
mg_h2o-5_ch3oh-1_P2	aOMgO	4	2	18	x	90.7	90.7	74.2	91	90.7	aOMgO	a								0	-16.5	0.3	0		0	16.5	0.3	0
mg_h2o-5_ch3oh-1_P2	aOMgO	5	2	6	x	176.6	176.6	177.8	176.2	177.1	aOMgO	a								0	1.2	-0.4	0.5		0	1.2	0.4	0.5
mg_h2o-5_ch3oh-1_P2	aOMgO	5	2	18	x	88.2	88.1	78.4	89	88.6	aOMgO	a								-0.1	-9.8	0.8	0.4		0.1	9.8	0.8	0.4
mg_h2o-5_ch3oh-1_P2	aOMgO	6	2	18	x	95.2	95.3	103.1	94.8	94.2	aOMgO	a								0.1	7.9	-0.4	-1		0.1	7.9	0.4	1
mg_h2o-3_ch3coo-1_P1	rMgO	2	1	x	x	2.053	2.067	2.012	2.059	2.058	rMgO	r								0.014	-0.041	0.006	0.005		0.014	0.041	0.006	0.005
mg_h2o-3_ch3coo-1_P1	rMgO	2	3	x	x	2.041	2.055	2.034	2.055	2.037	rMgO	r								0.014	-0.007	0.014	-0.004		0.014	0.007	0.014	0.004
mg_h2o-3_ch3coo-1_P1	rMgO	2	4	x	x	2.041	2.055	2.013	2.055	2.037	rMgO	r								0.014	-0.028	0.014	-0.004		0.014	0.028	0.014	0.004
mg_h2o-3_ch3coo-1_P1	rMgO	2	12	x	x	2.029	2.045	2.049	2.156	2.053	rMgO	r								0.016	0.02	0.127	0.024		0.016	0.02	0.127	0.024
mg_h2o-3_ch3coo-1_P1	rMgO	2	13	x	x	2	2.017	2.043	2.069	2.008	rMgO	r								0.017	0.043	0.069	0.008		0.017	0.043	0.069	0.008
mg_h2o-3_ch3coo-1_P1	aOMgO	1	2	3	x	101.3	102.2	119.6	103.4	99.3	aOMgO	a								0.9	18.3	2.1	-2		0.9	18.3	2.1	2
mg_h2o-3_ch3coo-1_P1	aOMgO	1	2	4	x	101.2	102.1	105.3	103.6	99.4	aOMgO	a								0.9	4.1	2.4	-1.8		0.9	4.1	2.4	1.8
mg_h2o-3_ch3coo-1_P1	aOMgO	1	2	12	x	156	155.3	128.2	157.8	159.4	aOMgO	a								-0.7	-27.8	1.8	3.4		0.7	27.8	1.8	3.4
mg_h2o-3_ch3coo-1_P1	aOMgO	1	2	13	x	90	89.7	74.7	95.8	94.2	aOMgO	a								-0.3	-15.3	5.8	4.2		0.3	15.3	5.8	4.2
mg_h2o-3_ch3coo-1_P1	aOMgO	3	2	4	x	109.2	109.3	96.5	110.7	110.5	aOMgO	a								0.1	-12.7	1.5	1.3		0.1	12.7	1.5	1.3
mg_h2o-3_ch3coo-1_P1	aOMgO	3	2	12	x	92.5	91.9	75	88.7	92.2	aOMgO	a								-0.6	-17.5	-3.8	-0.3		0.6	17.5	3.8	0.3
mg_h2o-3_ch3coo-1_P1	aOMgO	3	2	13	x	123.2	122.8	132.2	119.8	122.4	aOMgO	a								-0.4	9	-3.4	-0.8		0.4	9	3.4	0.8
mg_h2o-3_ch3coo-1_P1	aOMgO	4	2	12	x	92.6	92	123.1	88.9	92.3	aOMgO	a								-0.6	30.5	-3.7	-0.3		0.6	30.5	3.7	0.3
mg_h2o-3_ch3coo-1_P1	aOMgO	4	2	13	x	122.9	122.6	125.2	119.2	122	aOMgO	a								-0.3	2.3	-3.7	-0.9		0.3	2.3	3.7	0.9
mg_h2o-3_ch3coo-1_P1	aOMgO	12	2	13	x	65.9	65.6	63.4	62.1	65.2	aOMgO	a								-0.3	-2.5	-3.8	-0.7		0.3	2.5	3.8	0.7
mg_h2o-4_ch3coo-1_P1	rMgO	2	1	x	x	2.078	2.09	2.005	2.06	2.073	rMgO	r								0.012	-0.073	-0.018	-0.005		0.012	0.073	0.018	0.005
mg_h2o-4_ch3coo-1_P1	rMgO	2	3	x	x	2.143	2.152	2.102	2.107	2.125	rMgO	r								0.009	-0.041	-0.036	-0.018		0.009	0.041	0.036	0.018
mg_h2o-4_ch3coo-1_P1	rMgO	2	4	x	x	2.143	2.152	2.102	2.107	2.125	rMgO	r								0.009	-0.041	-0.036	-0.018		0.009	0.041	0.036	0.018
mg_h2o-4_ch3coo-1_P1	rMgO	2	5	x	x	2.084	2.096	2.049	2.122	2.08	rMgO	r								0.012	-0.035	0.038	-0.004		0.012	0.035	0.038	0.004
mg_h2o-4_ch3coo-1_P1	rMgO	2	15	x	x	2.054	2.069	2.11	2.465	2.078	rMgO	r								0.015	0.056	0.411	0.024		0.015	0.056	0.411	0.024
mg_h2o-4_ch3coo-1_P1	rMgO	2	16	x	x	2.056	2.07	2.061	2.091	2.059	rMgO	r								0.014	0.005	0.035	0.003		0.014	0.005	0.035	0.003
mg_h2o-4_ch3coo-1_P1	aOMgO	1	2	3	x	96.7	97.4	123.9	118.4	96.3	aOMgO	a								0.7	27.2	21.7	-0.4		0.7	27.2	21.7	0.4
mg_h2o-4_ch3coo-1_P1	aOMgO	1	2	4	x	96.7	97.4	123.8	118.3	96.3	aOMgO	a								0.7	27.1	21.6	-0.4		0.7	27.1	21.6	0.4
mg_h2o-4_ch3coo-1_P1	aOMgO	1	2	5	x	96.7	96	101.9	92.7	97	aOMgO	a								-0.7	5.2	-4	0.3		0.7	5.2	4	0.3
mg_h2o-4_ch3coo-1_P1	aOMgO	1	2	15	x	149.8	149	135.6	143.5	155.5	aOMgO	a								-0.8	-14.2	-6.3	5.7		0.8	14.2	6.3	5.7
mg_h2o-4_ch3coo-1_P1	aOMgO	1	2	16	x	85.3	84.7	73.3	86.7	91.5	aOMgO	a								-0.6	-12	1.4	6.2		0.6	12	1.4	6.2
mg_h2o-4_ch3coo-1_P1	aOMgO	3	2	4	x	160.7	158.9	108.6	123.2	166.7	aOMgO	a								-1.8	-52.1	-37.5	6		1.8	52.1	37.5	6
mg_h2o-4_ch3coo-1_P1	aOMgO	3	2	5	x	82.3	81.8	73.5	86.7	87.1	aOMgO	a								-0.5	-8.8	4.4	4.8		0.5	8.8	4.4	4.8
mg_h2o-4_ch3coo-1_P1	aOMgO	3	2	15	x	87.7	87.5	73.9	68.8	85.2	aOMgO	a								-0.2	-13.8	-18.9	-2.5		0.2	13.8	18.9	2.5
mg_h2o-4_ch3coo-1_P1	aOMgO	3	2	16	x	97.5	98.1	109	93.6	92	aOMgO	a								0.6	11.5	-3.9	-5.5		0.6	11.5	3.9	5.5
mg_h2o-4_ch3coo-1_P1	aOMgO	4	2	5	x	82.3	81.8	73.5	86.7	87.1	aOMgO	a								-0.5	-8.8	4.4	4.8		0.5	8.8	4.4	4.8
mg_h2o-4_ch3coo-1_P1	aOMgO	4	2	15	x	87.7	87.5	73.9	68.8	85.2	aOMgO	a								-0.2	-13.8	-18.9	-2.5		0.2	13.8	18.9	2.5
mg_h2o-4_ch3coo-1_P1	aOMgO	4	2	16	x	97.5	98.1	109	93.6	92	aOMgO	a								0.6	11.5	-3.9	-5.5		0.6	11.5	3.9	5.5
mg_h2o-4_ch3coo-1_P1	aOMgO	5	2	15	x	113.5	115	122.5	123.8	107.5	aOMgO	a								1.5	9	10.3	-6		1.5	9	10.3	6
mg_h2o-4_ch3coo-1_P1	aOMgO	5	2	16	x	178	179.3	175.3	179.4	171.5	aOMgO	a								1.3	-2.7	1.4	-6.5		1.3	2.7	1.4	6.5
mg_h2o-4_ch3coo-1_P1	aOMgO	15	2	16	x	64.5	64.3	62.2	56.9	64.1	aOMgO	a								-0.2	-2.3	-7.6	-0.4		0.2	2.3	7.6	0.4
mg_h2o-5_ch3coo-1_P1	rMgO	2	1	x	x	2.104	2.112	2.08	2.114	2.1	rMgO	r								0.008	-0.024	0.01	-0.004		0.008	0.024	0.01	0.004
mg_h2o-5_ch3coo-1_P1	rMgO	2	3	x	x	2.105	2.12	2.135	2.138	2.109	rMgO	r								0.015	0.03	0.033	0.004		0.015	0.03	0.033	0.004
mg_h2o-5_ch3coo-1_P1	rMgO	2	4	x	x	2.109	2.121	2.113	2.127	2.109	rMgO	r								0.012	0.004	0.018	0		0.012	0.004	0.018	0
mg_h2o-5_ch3coo-1_P1	rMgO	2	5	x	x	2.111	2.12	2.127	2.126	2.095	rMgO	r								0.009	0.016	0.015	-0.016		0.009	0.016	0.015	0.016
mg_h2o-5_ch3coo-1_P1	rMgO	2	6	x	x	2.121	2.129	2.107	2.13	2.115	rMgO	r								0.008	-0.014	0.009	-0.006		0.008	0.014	0.009	0.006
mg_h2o-5_ch3coo-1_P1	rMgO	2	19	x	x	2.01	2.024	2.072	2.086	2.034	rMgO	r								0.014	0.062	0.076	0.024		0.014	0.062	0.076	0.024
mg_h2o-5_ch3coo-1_P1	aOMgO	1	2	3	x	97.5	97.6	108	95.5	93.2	aOMgO	a								0.1	10.5	-2	-4.3		0.1	10.5	2	4.3
mg_h2o-5_ch3coo-1_P1	aOMgO	1	2	4	x	91.5	91.9	76.9	91.3	90.3	aOMgO	a								0.4	-14.6	-0.2	-1.2		0.4	14.6	0.2	1.2
mg_h2o-5_ch3coo-1_P1	aOMgO	1	2	5	x	86.3	86.4	71.6	92	91	aOMgO	a								0.1	-14.7	5.7	4.7		0.1	14.7	5.7	4.7
mg_h2o-5_ch3coo-1_P1	aOMgO	1	2	6	x	86.2	85.6	72.3	91.6	91.6	aOMgO	a								-0.6	-13.9	5.4	5.4		0.6	13.9	5.4	5.4
mg_h2o-5_ch3coo-1_P1	aOMgO	1	2	19	x	171.9	171.6	139.2	173.3	174.6	aOMgO	a								-0.3	-32.7	1.4	2.7		0.3	32.7	1.4	2.7
mg_h2o-5_ch3coo-1_P1	aOMgO	3	2	4	x	168.3	166.9	136	172.8	176.6	aOMgO	a								-1.4	-32.3	4.5	8.3		1.4	32.3	4.5	8.3
mg_h2o-5_ch3coo-1_P1	aOMgO	3	2	5	x	86.6	86.6	99.9	83.3	84.5	aOMgO	a								0	13.3	-3.3	-2.1		0	13.3	3.3	2.1
mg_h2o-5_ch3coo-1_P1	aOMgO	3	2	6	x	84.6	83.8	70	86.1	87.8	aOMgO	a								-0.8	-14.6	1.5	3.2		0.8	14.6	1.5	3.2
mg_h2o-5_ch3coo-1_P1	aOMgO	3	2	19	x	90.2	90.4	112.6	91.1	91.9	aOMgO	a								0.2	22.4	0.9	1.7		0.2	22.4	0.9	1.7
mg_h2o-5_ch3coo-1_P1	aOMgO	4	2	5	x	101.5	103	122.1	98.9	95.1	aOMgO	a								1.5	20.6	-2.6	-6.4		1.5	20.6	2.6	6.4
mg_h2o-5_ch3coo-1_P1	aOMgO	4	2	6	x	88.6	88.1	70.4	91.4	92.4	aOMgO	a								-0.5	-18.2	2.8	3.8		0.5	18.2	2.8	3.8
mg_h2o-5_ch3coo-1_P1	aOMgO	4	2	19	x	81.2	80.5	71.6	82.1	84.7	aOMgO	a								-0.7	-9.6	0.9	3.5		0.7	9.6	0.9	3.5
mg_h2o-5_ch3coo-1_P1	aOMgO	5	2	6	x	167.6	166.6	136.8	169	172.1	aOMgO	a								-1	-30.8	1.4	4.5		1	30.8	1.4	4.5
mg_h2o-5_ch3coo-1_P1	aOMgO	5	2	19	x	91.6	91.8	104.3	89.2	91.2	aOMgO	a								0.2	12.7	-2.4	-0.4		0.2	12.7	2.4	0.4
mg_h2o-5_ch3coo-1_P1	aOMgO	6	2	19	x	97.2	97.6	118.5	88.4	86.9	aOMgO	a								0.4	21.3	-8.8	-10.3		0.4	21.3	8.8	10.3
mg_h2o-2_ch3coo-2	rMgO	1	2	x	x	2.104	2.122	2.121	2.212	2.091	rMgO	r								0.018	0.017	0.108	-0.013		0.018	0.017	0.108	0.013
mg_h2o-2_ch3coo-2	rMgO	1	5	x	x	2.107	2.123	2.119	2.205	2.091	rMgO	r								0.016	0.012	0.098	-0.016		0.016	0.012	0.098	0.016
mg_h2o-2_ch3coo-2	rMgO	1	6	x	x	2.104	2.122	2.121	2.212	2.091	rMgO	r								0.018	0.017	0.108	-0.013		0.018	0.017	0.108	0.013
mg_h2o-2_ch3coo-2	rMgO	1	7	x	x	2.107	2.123	2.119	2.205	2.091	rMgO	r								0.016	0.012	0.098	-0.016		0.016	0.012	0.098	0.016
mg_h2o-2_ch3coo-2	rMgO	1	16	x	x	2.173	2.174	2.112	2.149	2.147	rMgO	r								0.001	-0.061	-0.024	-0.026		0.001	0.061	0.024	0.026
mg_h2o-2_ch3coo-2	rMgO	1	19	x	x	2.173	2.174	2.112	2.149	2.147	rMgO	r								0.001	-0.061	-0.024	-0.026		0.001	0.061	0.024	0.026
mg_h2o-2_ch3coo-2	aOMgO	2	1	5	x	62.9	62.6	61.3	59.7	63.6	aOMgO	a								-0.3	-1.6	-3.2	0.7		0.3	1.6	3.2	0.7
mg_h2o-2_ch3coo-2	aOMgO	2	1	6	x	180	180	180	180	180	aOMgO	a								0	0	0	0		0	0	0	0
mg_h2o-2_ch3coo-2	aOMgO	2	1	7	x	117.1	117.4	118.7	120.3	116.4	aOMgO	a								0.3	1.6	3.2	-0.7		0.3	1.6	3.2	0.7
mg_h2o-2_ch3coo-2	aOMgO	2	1	16	x	97.4	98.6	109.1	101.6	99.1	aOMgO	a								1.2	11.7	4.2	1.7		1.2	11.7	4.2	1.7
mg_h2o-2_ch3coo-2	aOMgO	2	1	19	x	82.6	81.4	70.9	78.4	80.9	aOMgO	a								-1.2	-11.7	-4.2	-1.7		1.2	11.7	4.2	1.7
mg_h2o-2_ch3coo-2	aOMgO	5	1	6	x	117.1	117.4	118.7	120.3	116.4	aOMgO	a								0.3	1.6	3.2	-0.7		0.3	1.6	3.2	0.7
mg_h2o-2_ch3coo-2	aOMgO	5	1	7	x	180	180	180	180	180	aOMgO	a								0	0	0	0		0	0	0	0
mg_h2o-2_ch3coo-2	aOMgO	5	1	16	x	82.8	81.5	70.9	78.9	80.9	aOMgO	a								-1.3	-11.9	-3.9	-1.9		1.3	11.9	3.9	1.9
mg_h2o-2_ch3coo-2	aOMgO	5	1	19	x	97.2	98.5	109.1	101.1	99.1	aOMgO	a								1.3	11.9	3.9	1.9		1.3	11.9	3.9	1.9
mg_h2o-2_ch3coo-2	aOMgO	6	1	7	x	62.9	62.6	61.3	59.7	63.6	aOMgO	a								-0.3	-1.6	-3.2	0.7		0.3	1.6	3.2	0.7
mg_h2o-2_ch3coo-2	aOMgO	6	1	16	x	82.7	81.4	70.9	78.4	80.9	aOMgO	a								-1.3	-11.8	-4.3	-1.8		1.3	11.8	4.3	1.8
mg_h2o-2_ch3coo-2	aOMgO	6	1	19	x	97.4	98.6	109.1	101.6	99.1	aOMgO	a								1.2	11.7	4.2	1.7		1.2	11.7	4.2	1.7
mg_h2o-2_ch3coo-2	aOMgO	7	1	16	x	97.2	98.5	109.1	101.1	99.1	aOMgO	a								1.3	11.9	3.9	1.9		1.3	11.9	3.9	1.9
mg_h2o-2_ch3coo-2	aOMgO	7	1	19	x	82.8	81.5	70.9	78.9	80.9	aOMgO	a								-1.3	-11.9	-3.9	-1.9		1.3	11.9	3.9	1.9
mg_h2o-2_ch3coo-2	aOMgO	16	1	19	x	180	180	180	180	180	aOMgO	a								0	0	0	0		0	0	0	0
mg_h2o-2_ch3coo-2_ochnh2-2	rMgO	33	1	x	x	2.099	2.105	2.106	2.111	2.102	rMgO	r								0.006	0.007	0.012	0.003		0.006	0.007	0.012	0.003
mg_h2o-2_ch3coo-2_ochnh2-2	rMgO	33	2	x	x	2.149	2.161	2.105	2.203	2.131	rMgO	r								0.012	-0.044	0.054	-0.018		0.012	0.044	0.054	0.018
mg_h2o-2_ch3coo-2_ochnh2-2	rMgO	33	3	x	x	2.143	2.153	2.102	2.241	2.151	rMgO	r								0.01	-0.041	0.098	0.008		0.01	0.041	0.098	0.008
mg_h2o-2_ch3coo-2_ochnh2-2	rMgO	33	4	x	x	2.136	2.14	2.134	2.174	2.147	rMgO	r								0.004	-0.002	0.038	0.011		0.004	0.002	0.038	0.011
mg_h2o-2_ch3coo-2_ochnh2-2	rMgO	33	11	x	x	2.045	2.061	1.981	2.111	2.083	rMgO	r								0.016	-0.064	0.066	0.038		0.016	0.064	0.066	0.038
mg_h2o-2_ch3coo-2_ochnh2-2	rMgO	33	18	x	x	2.06	2.072	1.961	2.099	2.069	rMgO	r								0.012	-0.099	0.039	0.009		0.012	0.099	0.039	0.009
mg_h2o-2_ch3coo-2_ochnh2-2	aOMgO	1	33	2	x	87.3	86.5	73.9	85.1	86.5	aOMgO	a								-0.8	-13.4	-2.2	-0.8		0.8	13.4	2.2	0.8
mg_h2o-2_ch3coo-2_ochnh2-2	aOMgO	1	33	3	x	92.4	93.3	93.3	93.5	92.2	aOMgO	a								0.9	0.9	1.1	-0.2		0.9	0.9	1.1	0.2
mg_h2o-2_ch3coo-2_ochnh2-2	aOMgO	1	33	4	x	88.3	88.3	71.8	89.1	88.5	aOMgO	a								0	-16.5	0.8	0.2		0	16.5	0.8	0.2
mg_h2o-2_ch3coo-2_ochnh2-2	aOMgO	1	33	11	x	177.5	176.9	167.6	177.1	177.1	aOMgO	a								-0.6	-9.9	-0.4	-0.4		0.6	9.9	0.4	0.4
mg_h2o-2_ch3coo-2_ochnh2-2	aOMgO	1	33	18	x	88.2	88.4	94.8	90.7	90	aOMgO	a								0.2	6.6	2.5	1.8		0.2	6.6	2.5	1.8
mg_h2o-2_ch3coo-2_ochnh2-2	aOMgO	2	33	3	x	173.6	172.8	151.2	167.6	170.3	aOMgO	a								-0.8	-22.4	-6	-3.3		0.8	22.4	6	3.3
mg_h2o-2_ch3coo-2_ochnh2-2	aOMgO	2	33	4	x	87.4	87.3	80.3	86.9	86.8	aOMgO	a								-0.1	-7.1	-0.5	-0.6		0.1	7.1	0.5	0.6
mg_h2o-2_ch3coo-2_ochnh2-2	aOMgO	2	33	11	x	91.2	91.1	100.3	95.9	94.2	aOMgO	a								-0.1	9.1	4.7	3		0.1	9.1	4.7	3
mg_h2o-2_ch3coo-2_ochnh2-2	aOMgO	2	33	18	x	93.9	94.7	108.5	97.1	94.5	aOMgO	a								0.8	14.6	3.2	0.6		0.8	14.6	3.2	0.6
mg_h2o-2_ch3coo-2_ochnh2-2	aOMgO	3	33	4	x	86.2	85.5	71.2	80.7	83.5	aOMgO	a								-0.7	-15	-5.5	-2.7		0.7	15	5.5	2.7
mg_h2o-2_ch3coo-2_ochnh2-2	aOMgO	3	33	11	x	88.9	88.9	86.8	85	86.6	aOMgO	a								0	-2.1	-3.9	-2.3		0	2.1	3.9	2.3
mg_h2o-2_ch3coo-2_ochnh2-2	aOMgO	3	33	18	x	92.4	92.4	98.1	95.2	95.2	aOMgO	a								0	5.7	2.8	2.8		0	5.7	2.8	2.8
mg_h2o-2_ch3coo-2_ochnh2-2	aOMgO	4	33	11	x	89.6	89.6	96.6	88.3	88.7	aOMgO	a								0	7	-1.3	-0.9		0	7	1.3	0.9
mg_h2o-2_ch3coo-2_ochnh2-2	aOMgO	4	33	18	x	176.2	175.9	161.8	175.9	177.9	aOMgO	a								-0.3	-14.4	-0.3	1.7		0.3	14.4	0.3	1.7
mg_h2o-2_ch3coo-2_ochnh2-2	aOMgO	11	33	18	x	93.9	93.9	97.4	91.9	92.8	aOMgO	a								0	3.5	-2	-1.1		0	3.5	2	1.1
mg_h2o-2_ch3oh-1_ochnh2-1_P2	rMgO	2	1	x	x	2.019	2.036	2.002	2.033	2.012	rMgO	r								0.017	-0.017	0.014	-0.007		0.017	0.017	0.014	0.007
mg_h2o-2_ch3oh-1_ochnh2-1_P2	rMgO	2	3	x	x	2.017	2.034	1.999	2.023	2.001	rMgO	r								0.017	-0.018	0.006	-0.016		0.017	0.018	0.006	0.016
mg_h2o-2_ch3oh-1_ochnh2-1_P2	rMgO	2	4	x	x	1.9	1.92	1.887	1.97	1.914	rMgO	r								0.02	-0.013	0.07	0.014		0.02	0.013	0.07	0.014
mg_h2o-2_ch3oh-1_ochnh2-1_P2	rMgO	2	10	x	x	1.987	2.004	1.953	2.007	1.981	rMgO	r								0.017	-0.034	0.02	-0.006		0.017	0.034	0.02	0.006
mg_h2o-2_ch3oh-1_ochnh2-1_P2	aOMgO	1	2	3	x	103.6	103.3	104.5	106.1	105.6	aOMgO	a								-0.3	0.9	2.5	2		0.3	0.9	2.5	2
mg_h2o-2_ch3oh-1_ochnh2-1_P2	aOMgO	1	2	4	x	116.5	117.1	116	117.4	116.4	aOMgO	a								0.6	-0.5	0.9	-0.1		0.6	0.5	0.9	0.1
mg_h2o-2_ch3oh-1_ochnh2-1_P2	aOMgO	1	2	10	x	104.5	103.9	103.6	107.6	106.9	aOMgO	a								-0.6	-0.9	3.1	2.4		0.6	0.9	3.1	2.4
mg_h2o-2_ch3oh-1_ochnh2-1_P2	aOMgO	3	2	4	x	109.7	110	108.8	104.4	106	aOMgO	a								0.3	-0.9	-5.3	-3.7		0.3	0.9	5.3	3.7
mg_h2o-2_ch3oh-1_ochnh2-1_P2	aOMgO	3	2	10	x	106.7	106.3	110.6	109.7	108.1	aOMgO	a								-0.4	3.9	3	1.4		0.4	3.9	3	1.4
mg_h2o-2_ch3oh-1_ochnh2-1_P2	aOMgO	4	2	10	x	114.8	115	112.9	111.4	113.3	aOMgO	a								0.2	-1.9	-3.4	-1.5		0.2	1.9	3.4	1.5
mg_h2o-3_ch3coo-2	rMgO	1	2	x	x	2.167	2.17	2.154	2.158	2.165	rMgO	r								0.003	-0.013	-0.009	-0.002		0.003	0.013	0.009	0.002
mg_h2o-3_ch3coo-2	rMgO	1	3	x	x	2.132	2.135	2.072	2.092	2.092	rMgO	r								0.003	-0.06	-0.04	-0.04		0.003	0.06	0.04	0.04
mg_h2o-3_ch3coo-2	rMgO	1	4	x	x	2.105	2.114	2.089	2.07	2.08	rMgO	r								0.009	-0.016	-0.035	-0.025		0.009	0.016	0.035	0.025
mg_h2o-3_ch3coo-2	rMgO	1	12	x	x	2.08	2.1	2.104	2.092	2.059	rMgO	r								0.02	0.024	0.012	-0.021		0.02	0.024	0.012	0.021
mg_h2o-3_ch3coo-2	rMgO	1	13	x	x	2.104	2.118	2.108	2.444	2.121	rMgO	r								0.014	0.004	0.34	0.017		0.014	0.004	0.34	0.017
mg_h2o-3_ch3coo-2	rMgO	1	19	x	x	2.07	2.083	1.982	2.199	2.121	rMgO	r								0.013	-0.088	0.129	0.051		0.013	0.088	0.129	0.051
mg_h2o-3_ch3coo-2	aOMgO	2	1	3	x	166.8	166.5	149.7	146	161.1	aOMgO	a								-0.3	-17.1	-20.8	-5.7		0.3	17.1	20.8	5.7
mg_h2o-3_ch3coo-2	aOMgO	2	1	4	x	94.6	93.3	75.7	113.4	99.6	aOMgO	a								-1.3	-18.9	18.8	5		1.3	18.9	18.8	5
mg_h2o-3_ch3coo-2	aOMgO	2	1	12	x	90.2	88.5	72.7	92.7	93.8	aOMgO	a								-1.7	-17.5	2.5	3.6		1.7	17.5	2.5	3.6
mg_h2o-3_ch3coo-2	aOMgO	2	1	13	x	96.3	98.4	133.9	69.8	80.7	aOMgO	a								2.1	37.6	-26.5	-15.6		2.1	37.6	26.5	15.6
mg_h2o-3_ch3coo-2	aOMgO	2	1	19	x	77.3	77.2	74.5	76	77.2	aOMgO	a								-0.1	-2.8	-1.3	-0.1		0.1	2.8	1.3	0.1
mg_h2o-3_ch3coo-2	aOMgO	3	1	4	x	82.9	83	74.7	91.9	88	aOMgO	a								0.1	-8.2	9	5.1		0.1	8.2	9	5.1
mg_h2o-3_ch3coo-2	aOMgO	3	1	12	x	103.1	105	129.7	99.6	101.1	aOMgO	a								1.9	26.6	-3.5	-2		1.9	26.6	3.5	2
mg_h2o-3_ch3coo-2	aOMgO	3	1	13	x	89.6	88.6	73.9	90.4	95.5	aOMgO	a								-1	-15.7	0.8	5.9		1	15.7	0.8	5.9
mg_h2o-3_ch3coo-2	aOMgO	3	1	19	x	89.7	89.8	101.9	84.1	86.1	aOMgO	a								0.1	12.2	-5.6	-3.6		0.1	12.2	5.6	3.6
mg_h2o-3_ch3coo-2	aOMgO	4	1	12	x	102.7	103.8	121	110.4	104.2	aOMgO	a								1.1	18.3	7.7	1.5		1.1	18.3	7.7	1.5
mg_h2o-3_ch3coo-2	aOMgO	4	1	13	x	162.3	162	134.3	167.9	167.6	aOMgO	a								-0.3	-28	5.6	5.3		0.3	28	5.6	5.3
mg_h2o-3_ch3coo-2	aOMgO	4	1	19	x	90.1	90.3	95.4	85.7	86.8	aOMgO	a								0.2	5.3	-4.4	-3.3		0.2	5.3	4.4	3.3
mg_h2o-3_ch3coo-2	aOMgO	12	1	13	x	63.4	63.1	61.8	57.5	63.6	aOMgO	a								-0.3	-1.6	-5.9	0.2		0.3	1.6	5.9	0.2
mg_h2o-3_ch3coo-2	aOMgO	12	1	19	x	162.9	160.5	121.3	163.3	166.9	aOMgO	a								-2.4	-41.6	0.4	4		2.4	41.6	0.4	4
mg_h2o-3_ch3coo-2	aOMgO	13	1	19	x	106	105.6	123	106.4	105.2	aOMgO	a								-0.4	17	0.4	-0.8		0.4	17	0.4	0.8
mg_h2o-3_ch3coo-2_ochnh2-1	rMgO	30	1	x	x	2.074	2.082	2.114	2.104	2.091	rMgO	r								0.008	0.04	0.03	0.017		0.008	0.04	0.03	0.017
mg_h2o-3_ch3coo-2_ochnh2-1	rMgO	30	2	x	x	2.155	2.162	2.135	2.164	2.146	rMgO	r								0.007	-0.02	0.009	-0.009		0.007	0.02	0.009	0.009
mg_h2o-3_ch3coo-2_ochnh2-1	rMgO	30	3	x	x	2.136	2.147	2.143	2.223	2.112	rMgO	r								0.011	0.007	0.087	-0.024		0.011	0.007	0.087	0.024
mg_h2o-3_ch3coo-2_ochnh2-1	rMgO	30	4	x	x	2.179	2.18	2.144	2.255	2.189	rMgO	r								0.001	-0.035	0.076	0.01		0.001	0.035	0.076	0.01
mg_h2o-3_ch3coo-2_ochnh2-1	rMgO	30	13	x	x	2.065	2.08	1.986	2.126	2.094	rMgO	r								0.015	-0.079	0.061	0.029		0.015	0.079	0.061	0.029
mg_h2o-3_ch3coo-2_ochnh2-1	rMgO	30	20	x	x	2.021	2.038	1.947	2.066	2.032	rMgO	r								0.017	-0.074	0.045	0.011		0.017	0.074	0.045	0.011
mg_h2o-3_ch3coo-2_ochnh2-1	aOMgO	1	30	2	x	93.3	93	113.4	92.2	91.2	aOMgO	a								-0.3	20.1	-1.1	-2.1		0.3	20.1	1.1	2.1
mg_h2o-3_ch3coo-2_ochnh2-1	aOMgO	1	30	3	x	93.4	93.8	72.4	92.1	93.1	aOMgO	a								0.4	-21	-1.3	-0.3		0.4	21	1.3	0.3
mg_h2o-3_ch3coo-2_ochnh2-1	aOMgO	1	30	4	x	88.5	88.9	68.6	87.8	87.6	aOMgO	a								0.4	-19.9	-0.7	-0.9		0.4	19.9	0.7	0.9
mg_h2o-3_ch3coo-2_ochnh2-1	aOMgO	1	30	13	x	175.8	176.2	137.7	171.1	172.5	aOMgO	a								0.4	-38.1	-4.7	-3.3		0.4	38.1	4.7	3.3
mg_h2o-3_ch3coo-2_ochnh2-1	aOMgO	1	30	20	x	87.3	87	95.3	90.8	90.1	aOMgO	a								-0.3	8	3.5	2.8		0.3	8	3.5	2.8
mg_h2o-3_ch3coo-2_ochnh2-1	aOMgO	2	30	3	x	168.2	167.5	171.9	165.2	168	aOMgO	a								-0.7	3.7	-3	-0.2		0.7	3.7	3	0.2
mg_h2o-3_ch3coo-2_ochnh2-1	aOMgO	2	30	4	x	83.6	83.4	66.6	78.7	79.4	aOMgO	a								-0.2	-17	-4.9	-4.2		0.2	17	4.9	4.2
mg_h2o-3_ch3coo-2_ochnh2-1	aOMgO	2	30	13	x	85	85	94.7	88.8	88.7	aOMgO	a								0	9.7	3.8	3.7		0	9.7	3.8	3.7
mg_h2o-3_ch3coo-2_ochnh2-1	aOMgO	2	30	20	x	98.6	99.6	96.4	103.6	98.7	aOMgO	a								1	-2.2	5	0.1		1	2.2	5	0.1
mg_h2o-3_ch3coo-2_ochnh2-1	aOMgO	3	30	4	x	86.9	86.2	112.1	87.4	89.6	aOMgO	a								-0.7	25.2	0.5	2.7		0.7	25.2	0.5	2.7
mg_h2o-3_ch3coo-2_ochnh2-1	aOMgO	3	30	13	x	87.7	87.6	77.4	84.9	85.6	aOMgO	a								-0.1	-10.3	-2.8	-2.1		0.1	10.3	2.8	2.1
mg_h2o-3_ch3coo-2_ochnh2-1	aOMgO	3	30	20	x	91.4	91.2	88.5	90.5	92.5	aOMgO	a								-0.2	-2.9	-0.9	1.1		0.2	2.9	0.9	1.1
mg_h2o-3_ch3coo-2_ochnh2-1	aOMgO	4	30	13	x	87.5	87.6	97.3	83.7	84.9	aOMgO	a								0.1	9.8	-3.8	-2.6		0.1	9.8	3.8	2.6
mg_h2o-3_ch3coo-2_ochnh2-1	aOMgO	4	30	20	x	175.3	175	146.7	177.4	177	aOMgO	a								-0.3	-28.6	2.1	1.7		0.3	28.6	2.1	1.7
mg_h2o-3_ch3coo-2_ochnh2-1	aOMgO	13	30	20	x	96.8	96.5	113	97.6	97.3	aOMgO	a								-0.3	16.2	0.8	0.5		0.3	16.2	0.8	0.5
mg_h2o-3_ch3coo-3_M1	rMgO	1	2	x	x	2.163	2.166	2.143	2.142	2.142	rMgO	r								0.003	-0.02	-0.021	-0.021		0.003	0.02	0.021	0.021
mg_h2o-3_ch3coo-3_M1	rMgO	1	7	x	x	2.03	2.046	1.976	2.049	2.037	rMgO	r								0.016	-0.054	0.019	0.007		0.016	0.054	0.019	0.007
mg_h2o-3_ch3coo-3_M1	rMgO	1	14	x	x	2.028	2.044	1.98	2.061	2.036	rMgO	r								0.016	-0.048	0.033	0.008		0.016	0.048	0.033	0.008
mg_h2o-3_ch3coo-3_M1	rMgO	1	21	x	x	2.068	2.088	2.019	2.103	2.098	rMgO	r								0.02	-0.049	0.035	0.03		0.02	0.049	0.035	0.03
mg_h2o-3_ch3coo-3_M1	rMgO	1	26	x	x	2.24	2.238	2.202	2.433	2.238	rMgO	r								-0.002	-0.038	0.193	-0.002		0.002	0.038	0.193	0.002
mg_h2o-3_ch3coo-3_M1	rMgO	1	28	x	x	2.256	2.257	2.195	2.432	2.232	rMgO	r								0.001	-0.061	0.176	-0.024		0.001	0.061	0.176	0.024
mg_h2o-3_ch3coo-3_M1	aOMgO	2	1	7	x	92.6	93.3	92	97.4	94.8	aOMgO	a								0.7	-0.6	4.8	2.2		0.7	0.6	4.8	2.2
mg_h2o-3_ch3coo-3_M1	aOMgO	2	1	14	x	89	88.8	91.1	90.7	89.5	aOMgO	a								-0.2	2.1	1.7	0.5		0.2	2.1	1.7	0.5
mg_h2o-3_ch3coo-3_M1	aOMgO	2	1	21	x	166.1	164.8	157.3	156.1	163.3	aOMgO	a								-1.3	-8.8	-10	-2.8		1.3	8.8	10	2.8
mg_h2o-3_ch3coo-3_M1	aOMgO	2	1	26	x	92.4	94.5	93.3	91.1	92.2	aOMgO	a								2.1	0.9	-1.3	-0.2		2.1	0.9	1.3	0.2
mg_h2o-3_ch3coo-3_M1	aOMgO	2	1	28	x	80.3	79	69.6	72.4	78.5	aOMgO	a								-1.3	-10.7	-7.9	-1.8		1.3	10.7	7.9	1.8
mg_h2o-3_ch3coo-3_M1	aOMgO	7	1	14	x	98.2	98.3	104.3	105	100.6	aOMgO	a								0.1	6.1	6.8	2.4		0.1	6.1	6.8	2.4
mg_h2o-3_ch3coo-3_M1	aOMgO	7	1	21	x	100.2	101.1	105.4	100.8	98.9	aOMgO	a								0.9	5.2	0.6	-1.3		0.9	5.2	0.6	1.3
mg_h2o-3_ch3coo-3_M1	aOMgO	7	1	26	x	87	86.7	91.8	88.7	87.8	aOMgO	a								-0.3	4.8	1.7	0.8		0.3	4.8	1.7	0.8
mg_h2o-3_ch3coo-3_M1	aOMgO	7	1	28	x	163.4	161.9	153.2	153.9	162.1	aOMgO	a								-1.5	-10.2	-9.5	-1.3		1.5	10.2	9.5	1.3
mg_h2o-3_ch3coo-3_M1	aOMgO	14	1	21	x	94.7	94	98.5	99.2	97.2	aOMgO	a								-0.7	3.8	4.5	2.5		0.7	3.8	4.5	2.5
mg_h2o-3_ch3coo-3_M1	aOMgO	14	1	26	x	174.5	173.9	163.2	165.8	171.2	aOMgO	a								-0.6	-11.3	-8.7	-3.3		0.6	11.3	8.7	3.3
mg_h2o-3_ch3coo-3_M1	aOMgO	14	1	28	x	96.7	98	95.8	99.2	95.9	aOMgO	a								1.3	-0.9	2.5	-0.8		1.3	0.9	2.5	0.8
mg_h2o-3_ch3coo-3_M1	aOMgO	21	1	26	x	82.8	81.5	72	74.1	78.9	aOMgO	a								-1.3	-10.8	-8.7	-3.9		1.3	10.8	8.7	3.9
mg_h2o-3_ch3coo-3_M1	aOMgO	21	1	28	x	85.9	85.8	88.8	84.6	85.7	aOMgO	a								-0.1	2.9	-1.3	-0.2		0.1	2.9	1.3	0.2
mg_h2o-3_ch3coo-3_M1	aOMgO	26	1	28	x	78.4	77.7	70.7	68	76	aOMgO	a								-0.7	-7.7	-10.4	-2.4		0.7	7.7	10.4	2.4
mg_h2o-3_ch3oh-1_ch3coo-2	rMgO	30	1	x	x	2.06	2.07	2.081	2.103	2.091	rMgO	r								0.01	0.021	0.043	0.031		0.01	0.021	0.043	0.031
mg_h2o-3_ch3oh-1_ch3coo-2	rMgO	30	2	x	x	2.131	2.142	2.134	2.135	2.125	rMgO	r								0.011	0.003	0.004	-0.006		0.011	0.003	0.004	0.006
mg_h2o-3_ch3oh-1_ch3coo-2	rMgO	30	3	x	x	2.161	2.168	2.124	2.171	2.138	rMgO	r								0.007	-0.037	0.01	-0.023		0.007	0.037	0.01	0.023
mg_h2o-3_ch3oh-1_ch3coo-2	rMgO	30	4	x	x	2.202	2.201	2.186	2.32	2.197	rMgO	r								-0.001	-0.016	0.118	-0.005		0.001	0.016	0.118	0.005
mg_h2o-3_ch3oh-1_ch3coo-2	rMgO	30	14	x	x	2.077	2.092	2.005	2.144	2.087	rMgO	r								0.015	-0.072	0.067	0.01		0.015	0.072	0.067	0.01
mg_h2o-3_ch3oh-1_ch3coo-2	rMgO	30	21	x	x	2.004	2.02	1.943	2.051	2.019	rMgO	r								0.016	-0.061	0.047	0.015		0.016	0.061	0.047	0.015
mg_h2o-3_ch3oh-1_ch3coo-2	aOMgO	1	30	2	x	99.9	100.2	96.6	96.8	95.8	aOMgO	a								0.3	-3.3	-3.1	-4.1		0.3	3.3	3.1	4.1
mg_h2o-3_ch3oh-1_ch3coo-2	aOMgO	1	30	3	x	93.9	94.1	90.8	91.6	90.9	aOMgO	a								0.2	-3.1	-2.3	-3		0.2	3.1	2.3	3
mg_h2o-3_ch3oh-1_ch3coo-2	aOMgO	1	30	4	x	87	87.2	69.9	86.8	87.9	aOMgO	a								0.2	-17.1	-0.2	0.9		0.2	17.1	0.2	0.9
mg_h2o-3_ch3oh-1_ch3coo-2	aOMgO	1	30	14	x	169.6	169.6	153.1	163.8	167.6	aOMgO	a								0	-16.5	-5.8	-2		0	16.5	5.8	2
mg_h2o-3_ch3oh-1_ch3coo-2	aOMgO	1	30	21	x	87.7	87.5	92.5	91	90.5	aOMgO	a								-0.2	4.8	3.3	2.8		0.2	4.8	3.3	2.8
mg_h2o-3_ch3oh-1_ch3coo-2	aOMgO	2	30	3	x	163	162.2	157.4	162.3	167.1	aOMgO	a								-0.8	-5.6	-0.7	4.1		0.8	5.6	0.7	4.1
mg_h2o-3_ch3oh-1_ch3coo-2	aOMgO	2	30	4	x	82.7	82.5	68.3	75.6	78.4	aOMgO	a								-0.2	-14.4	-7.1	-4.3		0.2	14.4	7.1	4.3
mg_h2o-3_ch3oh-1_ch3coo-2	aOMgO	2	30	14	x	87	87	94.3	91.5	91.6	aOMgO	a								0	7.3	4.5	4.6		0	7.3	4.5	4.6
mg_h2o-3_ch3oh-1_ch3coo-2	aOMgO	2	30	21	x	97.5	98.2	99.6	101	99.2	aOMgO	a								0.7	2.1	3.5	1.7		0.7	2.1	3.5	1.7
mg_h2o-3_ch3oh-1_ch3coo-2	aOMgO	3	30	4	x	88.2	87.7	94.6	89.4	90.9	aOMgO	a								-0.5	6.4	1.2	2.7		0.5	6.4	1.2	2.7
mg_h2o-3_ch3oh-1_ch3coo-2	aOMgO	3	30	14	x	78.1	77.6	70.7	76.8	80	aOMgO	a								-0.5	-7.4	-1.3	1.9		0.5	7.4	1.3	1.9
mg_h2o-3_ch3oh-1_ch3coo-2	aOMgO	3	30	21	x	92.9	92.9	101.4	94.3	91.7	aOMgO	a								0	8.5	1.4	-1.2		0	8.5	1.4	1.2
mg_h2o-3_ch3oh-1_ch3coo-2	aOMgO	4	30	14	x	86.2	86.4	91.7	81.7	83.9	aOMgO	a								0.2	5.5	-4.5	-2.3		0.2	5.5	4.5	2.3
mg_h2o-3_ch3oh-1_ch3coo-2	aOMgO	4	30	21	x	174.7	174.6	156.5	175.7	177	aOMgO	a								-0.1	-18.2	1	2.3		0.1	18.2	1	2.3
mg_h2o-3_ch3oh-1_ch3coo-2	aOMgO	14	30	21	x	99.2	99	109.7	101.1	98.1	aOMgO	a								-0.2	10.5	1.9	-1.1		0.2	10.5	1.9	1.1
mg_h2o-3_ch3oh-1_ochnh2-1_P2	rMgO	2	1	x	x	1.955	1.973	1.925	2.018	1.971	rMgO	r								0.018	-0.03	0.063	0.016		0.018	0.03	0.063	0.016
mg_h2o-3_ch3oh-1_ochnh2-1_P2	rMgO	2	3	x	x	2.092	2.104	2.06	2.122	2.106	rMgO	r								0.012	-0.032	0.03	0.014		0.012	0.032	0.03	0.014
mg_h2o-3_ch3oh-1_ochnh2-1_P2	rMgO	2	4	x	x	2.092	2.104	2.021	2.122	2.106	rMgO	r								0.012	-0.071	0.03	0.014		0.012	0.071	0.03	0.014
mg_h2o-3_ch3oh-1_ochnh2-1_P2	rMgO	2	5	x	x	2.044	2.057	2.014	2.061	2.041	rMgO	r								0.013	-0.03	0.017	-0.003		0.013	0.03	0.017	0.003
mg_h2o-3_ch3oh-1_ochnh2-1_P2	rMgO	2	13	x	x	2.047	2.062	2.015	2.052	2.039	rMgO	r								0.015	-0.032	0.005	-0.008		0.015	0.032	0.005	0.008
mg_h2o-3_ch3oh-1_ochnh2-1_P2	aOMgO	1	2	3	x	90.6	90.7	114.4	90	90.7	aOMgO	a								0.1	23.8	-0.6	0.1		0.1	23.8	0.6	0.1
mg_h2o-3_ch3oh-1_ochnh2-1_P2	aOMgO	1	2	4	x	90.5	90.6	78.5	90.1	90.8	aOMgO	a								0.1	-12	-0.4	0.3		0.1	12	0.4	0.3
mg_h2o-3_ch3oh-1_ochnh2-1_P2	aOMgO	1	2	5	x	119.2	119.6	121.7	113.5	114.7	aOMgO	a								0.4	2.5	-5.7	-4.5		0.4	2.5	5.7	4.5
mg_h2o-3_ch3oh-1_ochnh2-1_P2	aOMgO	1	2	13	x	134.5	134.8	122.3	133.5	132.4	aOMgO	a								0.3	-12.2	-1	-2.1		0.3	12.2	1	2.1
mg_h2o-3_ch3oh-1_ochnh2-1_P2	aOMgO	3	2	4	x	177.9	177.1	167.1	178.4	177.6	aOMgO	a								-0.8	-10.8	0.5	-0.3		0.8	10.8	0.5	0.3
mg_h2o-3_ch3oh-1_ochnh2-1_P2	aOMgO	3	2	5	x	89	88.5	73.4	89.3	88.9	aOMgO	a								-0.5	-15.6	0.3	-0.1		0.5	15.6	0.3	0.1
mg_h2o-3_ch3oh-1_ochnh2-1_P2	aOMgO	3	2	13	x	90.2	90.5	72.9	90.5	90.2	aOMgO	a								0.3	-17.3	0.3	0		0.3	17.3	0.3	0
mg_h2o-3_ch3oh-1_ochnh2-1_P2	aOMgO	4	2	5	x	88.9	88.5	100.2	89.3	88.8	aOMgO	a								-0.4	11.3	0.4	-0.1		0.4	11.3	0.4	0.1
mg_h2o-3_ch3oh-1_ochnh2-1_P2	aOMgO	4	2	13	x	90.3	90.5	100.8	90.5	90.2	aOMgO	a								0.2	10.5	0.2	-0.1		0.2	10.5	0.2	0.1
mg_h2o-3_ch3oh-1_ochnh2-1_P2	aOMgO	5	2	13	x	106.3	105.6	115.3	113	112.9	aOMgO	a								-0.7	9	6.7	6.6		0.7	9	6.7	6.6
mg_h2o-3_ochnh2-1_P2	rMgO	1	2	x	x	2.013	2.031	1.992	2.018	1.995	rMgO	r								0.018	-0.021	0.005	-0.018		0.018	0.021	0.005	0.018
mg_h2o-3_ochnh2-1_P2	rMgO	1	3	x	x	2.015	2.032	1.995	2.027	2.005	rMgO	r								0.017	-0.02	0.012	-0.01		0.017	0.02	0.012	0.01
mg_h2o-3_ochnh2-1_P2	rMgO	1	4	x	x	2.01	2.027	1.992	2.018	1.995	rMgO	r								0.017	-0.018	0.008	-0.015		0.017	0.018	0.008	0.015
mg_h2o-3_ochnh2-1_P2	rMgO	1	11	x	x	1.895	1.915	1.874	1.964	1.912	rMgO	r								0.02	-0.021	0.069	0.017		0.02	0.021	0.069	0.017
mg_h2o-3_ochnh2-1_P2	aOMgO	2	1	3	x	103.6	102.8	104.6	107.5	106.7	aOMgO	a								-0.8	1	3.9	3.1		0.8	1	3.9	3.1
mg_h2o-3_ochnh2-1_P2	aOMgO	2	1	4	x	107.7	107.4	107.9	108.9	108.9	aOMgO	a								-0.3	0.2	1.2	1.2		0.3	0.2	1.2	1.2
mg_h2o-3_ochnh2-1_P2	aOMgO	2	1	11	x	110.8	111	109.9	106.8	107.7	aOMgO	a								0.2	-0.9	-4	-3.1		0.2	0.9	4	3.1
mg_h2o-3_ochnh2-1_P2	aOMgO	3	1	4	x	103.7	103.6	105	107.5	106.6	aOMgO	a								-0.1	1.3	3.8	2.9		0.1	1.3	3.8	2.9
mg_h2o-3_ochnh2-1_P2	aOMgO	3	1	11	x	118.8	119.6	118.9	119.3	119	aOMgO	a								0.8	0.1	0.5	0.2		0.8	0.1	0.5	0.2
mg_h2o-3_ochnh2-1_P2	aOMgO	4	1	11	x	111.4	111.5	109.9	106.6	107.6	aOMgO	a								0.1	-1.5	-4.8	-3.8		0.1	1.5	4.8	3.8
mg_h2o-4_ch3coo-2	rMgO	27	1	x	x	2.053	2.061	2.106	2.085	2.075	rMgO	r								0.008	0.053	0.032	0.022		0.008	0.053	0.032	0.022
mg_h2o-4_ch3coo-2	rMgO	27	2	x	x	2.123	2.131	2.113	2.123	2.109	rMgO	r								0.008	-0.01	0	-0.014		0.008	0.01	0	0.014
mg_h2o-4_ch3coo-2	rMgO	27	3	x	x	2.186	2.189	2.183	2.198	2.158	rMgO	r								0.003	-0.003	0.012	-0.028		0.003	0.003	0.012	0.028
mg_h2o-4_ch3coo-2	rMgO	27	4	x	x	2.187	2.188	2.139	2.235	2.175	rMgO	r								0.001	-0.048	0.048	-0.012		0.001	0.048	0.048	0.012
mg_h2o-4_ch3coo-2	rMgO	27	13	x	x	2.991	3.009	2.838	3.058	2.991	rMgO	r								0.018	-0.153	0.067	0		0.018	0.153	0.067	0
mg_h2o-4_ch3coo-2	rMgO	27	22	x	x	2.008	2.027	1.951	2.071	2.031	rMgO	r								0.019	-0.057	0.063	0.023		0.019	0.057	0.063	0.023
mg_h2o-4_ch3coo-2	aOMgO	1	27	2	x	99.1	98.5	128.7	98.7	96.4	aOMgO	a								-0.6	29.6	-0.4	-2.7		0.6	29.6	0.4	2.7
mg_h2o-4_ch3coo-2	aOMgO	1	27	3	x	95.6	96.9	75.3	96	93.7	aOMgO	a								1.3	-20.3	0.4	-1.9		1.3	20.3	0.4	1.9
mg_h2o-4_ch3coo-2	aOMgO	1	27	4	x	87.5	87.6	69.5	86	87.1	aOMgO	a								0.1	-18	-1.5	-0.4		0.1	18	1.5	0.4
mg_h2o-4_ch3coo-2	aOMgO	1	27	13	x	157.9	157.7	119.1	154.2	156	aOMgO	a								-0.2	-38.8	-3.7	-1.9		0.2	38.8	3.7	1.9
mg_h2o-4_ch3coo-2	aOMgO	1	27	22	x	87.1	86.6	93.6	89.8	88.9	aOMgO	a								-0.5	6.5	2.7	1.8		0.5	6.5	2.7	1.8
mg_h2o-4_ch3coo-2	aOMgO	2	27	3	x	163.5	162.8	155.8	165.1	168.9	aOMgO	a								-0.7	-7.7	1.6	5.4		0.7	7.7	1.6	5.4
mg_h2o-4_ch3coo-2	aOMgO	2	27	4	x	83.7	83.8	67.7	81.5	81.8	aOMgO	a								0.1	-16	-2.2	-1.9		0.1	16	2.2	1.9
mg_h2o-4_ch3coo-2	aOMgO	2	27	13	x	71.2	71.2	77.3	71.5	72.3	aOMgO	a								0	6.1	0.3	1.1		0	6.1	0.3	1.1
mg_h2o-4_ch3coo-2	aOMgO	2	27	22	x	99.6	101.1	98.5	100.8	100.6	aOMgO	a								1.5	-1.1	1.2	1		1.5	1.1	1.2	1
mg_h2o-4_ch3coo-2	aOMgO	3	27	4	x	89.6	89.4	132.8	97.2	94.3	aOMgO	a								-0.2	43.2	7.6	4.7		0.2	43.2	7.6	4.7
mg_h2o-4_ch3coo-2	aOMgO	3	27	13	x	92.4	91.7	93.6	94	96.6	aOMgO	a								-0.7	1.2	1.6	4.2		0.7	1.2	1.6	4.2
mg_h2o-4_ch3coo-2	aOMgO	3	27	22	x	88.5	87.3	74.8	81.7	83.9	aOMgO	a								-1.2	-13.7	-6.8	-4.6		1.2	13.7	6.8	4.6
mg_h2o-4_ch3coo-2	aOMgO	4	27	13	x	72	71.9	77.7	69.2	70.6	aOMgO	a								-0.1	5.7	-2.8	-1.4		0.1	5.7	2.8	1.4
mg_h2o-4_ch3coo-2	aOMgO	4	27	22	x	174	173	136.5	175.5	175.5	aOMgO	a								-1	-37.5	1.5	1.5		1	37.5	1.5	1.5
mg_h2o-4_ch3coo-2	aOMgO	13	27	22	x	113.8	114.4	141.7	115.2	113.7	aOMgO	a								0.6	27.9	1.4	-0.1		0.6	27.9	1.4	0.1
mg_h2o-4_ch3oh-1_ochnh2-1_P2	rMgO	2	1	x	x	2.019	2.034	1.984	2.079	2.045	rMgO	r								0.015	-0.035	0.06	0.026		0.015	0.035	0.06	0.026
mg_h2o-4_ch3oh-1_ochnh2-1_P2	rMgO	2	3	x	x	2.107	2.12	2.087	2.135	2.111	rMgO	r								0.013	-0.02	0.028	0.004		0.013	0.02	0.028	0.004
mg_h2o-4_ch3oh-1_ochnh2-1_P2	rMgO	2	4	x	x	2.107	2.12	2.086	2.135	2.111	rMgO	r								0.013	-0.021	0.028	0.004		0.013	0.021	0.028	0.004
mg_h2o-4_ch3oh-1_ochnh2-1_P2	rMgO	2	5	x	x	2.151	2.162	2.072	2.175	2.144	rMgO	r								0.011	-0.079	0.024	-0.007		0.011	0.079	0.024	0.007
mg_h2o-4_ch3oh-1_ochnh2-1_P2	rMgO	2	6	x	x	2.108	2.119	2.074	2.129	2.107	rMgO	r								0.011	-0.034	0.021	-0.001		0.011	0.034	0.021	0.001
mg_h2o-4_ch3oh-1_ochnh2-1_P2	rMgO	2	16	x	x	2.101	2.108	2.052	2.097	2.098	rMgO	r								0.007	-0.049	-0.004	-0.003		0.007	0.049	0.004	0.003
mg_h2o-4_ch3oh-1_ochnh2-1_P2	aOMgO	1	2	3	x	90.6	90.5	100.1	90.2	90.6	aOMgO	a								-0.1	9.5	-0.4	0		0.1	9.5	0.4	0
mg_h2o-4_ch3oh-1_ochnh2-1_P2	aOMgO	1	2	4	x	90.6	90.5	102.8	90.3	90.6	aOMgO	a								-0.1	12.2	-0.3	0		0.1	12.2	0.3	0
mg_h2o-4_ch3oh-1_ochnh2-1_P2	aOMgO	1	2	5	x	94.6	94.9	94.6	92.9	93.6	aOMgO	a								0.3	0	-1.7	-1		0.3	0	1.7	1
mg_h2o-4_ch3oh-1_ochnh2-1_P2	aOMgO	1	2	6	x	92.4	92.7	71.7	88.3	89.6	aOMgO	a								0.3	-20.7	-4.1	-2.8		0.3	20.7	4.1	2.8
mg_h2o-4_ch3oh-1_ochnh2-1_P2	aOMgO	1	2	16	x	177.6	177.4	157.7	179.2	178.9	aOMgO	a								-0.2	-19.9	1.6	1.3		0.2	19.9	1.6	1.3
mg_h2o-4_ch3oh-1_ochnh2-1_P2	aOMgO	3	2	4	x	178.9	179	139.8	179.3	178.8	aOMgO	a								0.1	-39.1	0.4	-0.1		0.1	39.1	0.4	0.1
mg_h2o-4_ch3oh-1_ochnh2-1_P2	aOMgO	3	2	5	x	90	90	72.5	89.7	89.8	aOMgO	a								0	-17.5	-0.3	-0.2		0	17.5	0.3	0.2
mg_h2o-4_ch3oh-1_ochnh2-1_P2	aOMgO	3	2	6	x	90	89.9	114.8	90.3	90.1	aOMgO	a								-0.1	24.8	0.3	0.1		0.1	24.8	0.3	0.1
mg_h2o-4_ch3oh-1_ochnh2-1_P2	aOMgO	3	2	16	x	89.4	89.5	70.9	89.8	89.4	aOMgO	a								0.1	-18.5	0.4	0		0.1	18.5	0.4	0
mg_h2o-4_ch3oh-1_ochnh2-1_P2	aOMgO	4	2	5	x	90	90	73.1	89.7	89.8	aOMgO	a								0	-16.9	-0.3	-0.2		0	16.9	0.3	0.2
mg_h2o-4_ch3oh-1_ochnh2-1_P2	aOMgO	4	2	6	x	90	89.9	103.6	90.3	90.1	aOMgO	a								-0.1	13.6	0.3	0.1		0.1	13.6	0.3	0.1
mg_h2o-4_ch3oh-1_ochnh2-1_P2	aOMgO	4	2	16	x	89.4	89.5	96.5	89.7	89.4	aOMgO	a								0.1	7.1	0.3	0		0.1	7.1	0.3	0
mg_h2o-4_ch3oh-1_ochnh2-1_P2	aOMgO	5	2	6	x	173	172.3	165	178.8	176.8	aOMgO	a								-0.7	-8	5.8	3.8		0.7	8	5.8	3.8
mg_h2o-4_ch3oh-1_ochnh2-1_P2	aOMgO	5	2	16	x	83	82.4	101.7	86.3	85.3	aOMgO	a								-0.6	18.7	3.3	2.3		0.6	18.7	3.3	2.3
mg_h2o-4_ch3oh-1_ochnh2-1_P2	aOMgO	6	2	16	x	90	89.9	93.1	92.5	91.6	aOMgO	a								-0.1	3.1	2.5	1.6		0.1	3.1	2.5	1.6
mg_h2o-4_ochnh2-1_P2	rMgO	2	1	x	x	2.082	2.096	2.021	2.082	2.064	rMgO	r								0.014	-0.061	0	-0.018		0.014	0.061	0	0.018
mg_h2o-4_ochnh2-1_P2	rMgO	2	3	x	x	2.086	2.097	2.053	2.115	2.099	rMgO	r								0.011	-0.033	0.029	0.013		0.011	0.033	0.029	0.013
mg_h2o-4_ochnh2-1_P2	rMgO	2	4	x	x	2.086	2.097	2.053	2.115	2.099	rMgO	r								0.011	-0.033	0.029	0.013		0.011	0.033	0.029	0.013
mg_h2o-4_ochnh2-1_P2	rMgO	2	5	x	x	2.038	2.052	2.013	2.056	2.037	rMgO	r								0.014	-0.025	0.018	-0.001		0.014	0.025	0.018	0.001
mg_h2o-4_ochnh2-1_P2	rMgO	2	14	x	x	1.949	1.967	1.904	2.012	1.965	rMgO	r								0.018	-0.045	0.063	0.016		0.018	0.045	0.063	0.016
mg_h2o-4_ochnh2-1_P2	aOMgO	1	2	3	x	88.8	89	101.1	89.2	88.9	aOMgO	a								0.2	12.3	0.4	0.1		0.2	12.3	0.4	0.1
mg_h2o-4_ochnh2-1_P2	aOMgO	1	2	4	x	88.8	89	101.1	89.2	88.9	aOMgO	a								0.2	12.3	0.4	0.1		0.2	12.3	0.4	0.1
mg_h2o-4_ochnh2-1_P2	aOMgO	1	2	5	x	106.3	105.4	105.7	114.5	114.5	aOMgO	a								-0.9	-0.6	8.2	8.2		0.9	0.6	8.2	8.2
mg_h2o-4_ochnh2-1_P2	aOMgO	1	2	14	x	133.8	134.6	117.8	131.5	130.3	aOMgO	a								0.8	-16	-2.3	-3.5		0.8	16	2.3	3.5
mg_h2o-4_ochnh2-1_P2	aOMgO	3	2	4	x	177.3	177.2	144.7	178.2	177	aOMgO	a								-0.1	-32.6	0.9	-0.3		0.1	32.6	0.9	0.3
mg_h2o-4_ochnh2-1_P2	aOMgO	3	2	5	x	89.6	89.4	73.9	89.9	89.5	aOMgO	a								-0.2	-15.7	0.3	-0.1		0.2	15.7	0.3	0.1
mg_h2o-4_ochnh2-1_P2	aOMgO	3	2	14	x	91.3	91.4	96.8	90.9	91.5	aOMgO	a								0.1	5.5	-0.4	0.2		0.1	5.5	0.4	0.2
mg_h2o-4_ochnh2-1_P2	aOMgO	4	2	5	x	89.6	89.4	73.9	89.9	89.5	aOMgO	a								-0.2	-15.7	0.3	-0.1		0.2	15.7	0.3	0.1
mg_h2o-4_ochnh2-1_P2	aOMgO	4	2	14	x	91.3	91.4	96.8	90.9	91.5	aOMgO	a								0.1	5.5	-0.4	0.2		0.1	5.5	0.4	0.2
mg_h2o-4_ochnh2-1_P2	aOMgO	5	2	14	x	119.9	119.9	136.5	114.1	115.1	aOMgO	a								0	16.6	-5.8	-4.8		0	16.6	5.8	4.8
mg_h2o-5_ochnh2-1_P2	rMgO	2	1	x	x	2.105	2.118	2.081	2.129	2.108	rMgO	r								0.013	-0.024	0.024	0.003		0.013	0.024	0.024	0.003
mg_h2o-5_ochnh2-1_P2	rMgO	2	3	x	x	2.118	2.129	2.094	2.133	2.113	rMgO	r								0.011	-0.024	0.015	-0.005		0.011	0.024	0.015	0.005
mg_h2o-5_ochnh2-1_P2	rMgO	2	4	x	x	2.126	2.137	2.042	2.146	2.124	rMgO	r								0.011	-0.084	0.02	-0.002		0.011	0.084	0.02	0.002
mg_h2o-5_ochnh2-1_P2	rMgO	2	5	x	x	2.122	2.129	2.084	2.148	2.126	rMgO	r								0.007	-0.038	0.026	0.004		0.007	0.038	0.026	0.004
mg_h2o-5_ochnh2-1_P2	rMgO	2	6	x	x	2.105	2.118	2.079	2.129	2.108	rMgO	r								0.013	-0.026	0.024	0.003		0.013	0.026	0.024	0.003
mg_h2o-5_ochnh2-1_P2	rMgO	2	17	x	x	2.007	2.023	1.963	2.067	2.034	rMgO	r								0.016	-0.044	0.06	0.027		0.016	0.044	0.06	0.027
mg_h2o-5_ochnh2-1_P2	aOMgO	1	2	3	x	89.9	89.8	112.8	90.1	89.9	aOMgO	a								-0.1	22.9	0.2	0		0.1	22.9	0.2	0
mg_h2o-5_ochnh2-1_P2	aOMgO	1	2	4	x	89.9	89.9	72.3	89.8	90	aOMgO	a								0	-17.6	-0.1	0.1		0	17.6	0.1	0.1
mg_h2o-5_ochnh2-1_P2	aOMgO	1	2	5	x	88.7	88.7	71.4	88.8	88.8	aOMgO	a								0	-17.3	0.1	0.1		0	17.3	0.1	0.1
mg_h2o-5_ochnh2-1_P2	aOMgO	1	2	6	x	177.4	177.4	137.7	177.6	177.5	aOMgO	a								0	-39.7	0.2	0.1		0	39.7	0.2	0.1
mg_h2o-5_ochnh2-1_P2	aOMgO	1	2	17	x	91.3	91.3	105.2	91.2	91.2	aOMgO	a								0	13.9	-0.1	-0.1		0	13.9	0.1	0.1
mg_h2o-5_ochnh2-1_P2	aOMgO	3	2	4	x	169.4	168.7	174.8	174	173.5	aOMgO	a								-0.7	5.4	4.6	4.1		0.7	5.4	4.6	4.1
mg_h2o-5_ochnh2-1_P2	aOMgO	3	2	5	x	83.9	83.4	70.7	86.2	86.2	aOMgO	a								-0.5	-13.2	2.3	2.3		0.5	13.2	2.3	2.3
mg_h2o-5_ochnh2-1_P2	aOMgO	3	2	6	x	89.9	89.8	103	90.1	89.9	aOMgO	a								-0.1	13.1	0.2	0		0.1	13.1	0.2	0
mg_h2o-5_ochnh2-1_P2	aOMgO	3	2	17	x	93.9	94.4	73	90	90.8	aOMgO	a								0.5	-20.9	-3.9	-3.1		0.5	20.9	3.9	3.1
mg_h2o-5_ochnh2-1_P2	aOMgO	4	2	5	x	85.5	85.3	112.8	87.9	87.3	aOMgO	a								-0.2	27.3	2.4	1.8		0.2	27.3	2.4	1.8
mg_h2o-5_ochnh2-1_P2	aOMgO	4	2	6	x	89.9	90	72.8	89.8	90	aOMgO	a								0.1	-17.1	-0.1	0.1		0.1	17.1	0.1	0.1
mg_h2o-5_ochnh2-1_P2	aOMgO	4	2	17	x	96.7	96.9	105.1	95.9	95.7	aOMgO	a								0.2	8.4	-0.8	-1		0.2	8.4	0.8	1
mg_h2o-5_ochnh2-1_P2	aOMgO	5	2	6	x	88.7	88.7	101.7	88.8	88.8	aOMgO	a								0	13	0.1	0.1		0	13	0.1	0.1
mg_h2o-5_ochnh2-1_P2	aOMgO	5	2	17	x	177.8	177.8	138	176.2	177	aOMgO	a								0	-39.8	-1.6	-0.8		0	39.8	1.6	0.8
mg_h2o-5_ochnh2-1_P2	aOMgO	6	2	17	x	91.3	91.3	106.2	91.1	91.2	aOMgO	a								0	14.9	-0.2	-0.1		0	14.9	0.2	0.1
mg_ch3coo-3_ochnh2-1_M1	rMgO	1	4	x	x	1.969	1.987	1.964	2.051	2.015	rMgO	r								0.018	-0.005	0.082	0.046		0.018	0.005	0.082	0.046
mg_ch3coo-3_ochnh2-1_M1	rMgO	1	11	x	x	1.957	1.977	1.932	2.03	1.992	rMgO	r								0.02	-0.025	0.073	0.035		0.02	0.025	0.073	0.035
mg_ch3coo-3_ochnh2-1_M1	rMgO	1	18	x	x	2.092	2.109	2.073	2.157	2.103	rMgO	r								0.017	-0.019	0.065	0.011		0.017	0.019	0.065	0.011
mg_ch3coo-3_ochnh2-1_M1	rMgO	1	23	x	x	2.112	2.122	2.04	2.125	2.084	rMgO	r								0.01	-0.072	0.013	-0.028		0.01	0.072	0.013	0.028
mg_ch3coo-3_ochnh2-1_M1	aOMgO	4	1	11	x	118	118.1	117.1	117.4	119.8	aOMgO	a								0.1	-0.9	-0.6	1.8		0.1	0.9	0.6	1.8
mg_ch3coo-3_ochnh2-1_M1	aOMgO	4	1	18	x	121	120.9	122.3	122.3	121.7	aOMgO	a								-0.1	1.3	1.3	0.7		0.1	1.3	1.3	0.7
mg_ch3coo-3_ochnh2-1_M1	aOMgO	4	1	23	x	94.9	94.9	92.8	92	92.8	aOMgO	a								0	-2.1	-2.9	-2.1		0	2.1	2.9	2.1
mg_ch3coo-3_ochnh2-1_M1	aOMgO	11	1	18	x	119	118.8	116.7	114.9	116	aOMgO	a								-0.2	-2.3	-4.1	-3		0.2	2.3	4.1	3
mg_ch3coo-3_ochnh2-1_M1	aOMgO	11	1	23	x	98.9	99.2	102.8	104.1	98.9	aOMgO	a								0.3	3.9	5.2	0		0.3	3.9	5.2	0
mg_ch3coo-3_ochnh2-1_M1	aOMgO	18	1	23	x	90.9	91	94.5	97.6	94.2	aOMgO	a								0.1	3.6	6.7	3.3		0.1	3.6	6.7	3.3
mg_ch3oh-1_ch3coo-3_M1	rMgO	1	4	x	x	2.007	2.025	1.966	2.059	2.025	rMgO	r								0.018	-0.041	0.052	0.018		0.018	0.041	0.052	0.018
mg_ch3oh-1_ch3coo-3_M1	rMgO	1	11	x	x	1.955	1.977	1.934	2.015	1.984	rMgO	r								0.022	-0.021	0.06	0.029		0.022	0.021	0.06	0.029
mg_ch3oh-1_ch3coo-3_M1	rMgO	1	18	x	x	2.089	2.106	2.09	2.151	2.1	rMgO	r								0.017	0.001	0.062	0.011		0.017	0.001	0.062	0.011
mg_ch3oh-1_ch3coo-3_M1	rMgO	1	23	x	x	2.098	2.112	2.066	2.108	2.105	rMgO	r								0.014	-0.032	0.01	0.007		0.014	0.032	0.01	0.007
mg_ch3oh-1_ch3coo-3_M1	aOMgO	4	1	11	x	113.8	112.8	110.9	111.8	111.7	aOMgO	a								-1	-2.9	-2	-2.1		1	2.9	2	2.1
mg_ch3oh-1_ch3coo-3_M1	aOMgO	4	1	18	x	116.8	115.5	116.8	117.3	116	aOMgO	a								-1.3	0	0.5	-0.8		1.3	0	0.5	0.8
mg_ch3oh-1_ch3coo-3_M1	aOMgO	4	1	23	x	88.1	88.2	91.5	90.7	89.2	aOMgO	a								0.1	3.4	2.6	1.1		0.1	3.4	2.6	1.1
mg_ch3oh-1_ch3coo-3_M1	aOMgO	11	1	18	x	127.5	129.8	129.9	125.5	130.7	aOMgO	a								2.3	2.4	-2	3.2		2.3	2.4	2	3.2
mg_ch3oh-1_ch3coo-3_M1	aOMgO	11	1	23	x	99.2	98.9	101.5	105.5	99	aOMgO	a								-0.3	2.3	6.3	-0.2		0.3	2.3	6.3	0.2
mg_ch3oh-1_ch3coo-3_M1	aOMgO	18	1	23	x	95.4	95.6	91.9	96.3	93.6	aOMgO	a								0.2	-3.5	0.9	-1.8		0.2	3.5	0.9	1.8
mg_im-1_h2o-1_ch3coo-2	rMgN	10	1	x	x	2.133	2.143	2.029	2.114	2.092	rMgN	r								0.01	-0.104	-0.019	-0.041		0.01	0.104	0.019	0.041
mg_im-1_h2o-1_ch3coo-2	rMgO	10	11	x	x	2.022	2.034	2.054	2.043	2.036	rMgO	r								0.012	0.032	0.021	0.014		0.012	0.032	0.021	0.014
mg_im-1_h2o-1_ch3coo-2	rMgO	10	15	x	x	2.043	2.061	2.137	2.08	2.04	rMgO	r								0.018	0.094	0.037	-0.003		0.018	0.094	0.037	0.003
mg_im-1_h2o-1_ch3coo-2	rMgO	10	19	x	x	1.99	2.007	1.915	2.031	2.009	rMgO	r								0.017	-0.075	0.041	0.019		0.017	0.075	0.041	0.019
mg_im-1_h2o-1_ch3coo-2	aNMgO	1	10	11	x	116.1	117.2	104	115.2	115.1	aNMgO	a								1.1	-12.1	-0.9	-1		1.1	12.1	0.9	1
mg_im-1_h2o-1_ch3coo-2	aNMgO	1	10	15	x	118.9	118.5	133.5	116.3	118.2	aNMgO	a								-0.4	14.6	-2.6	-0.7		0.4	14.6	2.6	0.7
mg_im-1_h2o-1_ch3coo-2	aNMgO	1	10	19	x	94.5	94.1	106.3	100.8	97.6	aNMgO	a								-0.4	11.8	6.3	3.1		0.4	11.8	6.3	3.1
mg_im-1_h2o-1_ch3coo-2	aOMgO	11	10	15	x	119.9	119.1	75.2	112.6	119.4	aOMgO	a								-0.8	-44.7	-7.3	-0.5		0.8	44.7	7.3	0.5
mg_im-1_h2o-1_ch3coo-2	aOMgO	11	10	19	x	90.1	89.8	99.7	94.4	91.9	aOMgO	a								-0.3	9.6	4.3	1.8		0.3	9.6	4.3	1.8
mg_im-1_h2o-1_ch3coo-2	aOMgO	15	10	19	x	107.6	108.5	119.9	114.8	107.2	aOMgO	a								0.9	12.3	7.2	-0.4		0.9	12.3	7.2	0.4
mg_hcoo-4_M2	rMgO	1	4	x	x	1.964	1.98	1.928	2.035	1.987	rMgO	r								0.016	-0.036	0.071	0.023		0.016	0.036	0.071	0.023
mg_hcoo-4_M2	aOMgO	4	1	7	x	108.6	107.8	103.9	109.1	109.1	aOMgO	a								-0.8	-4.7	0.5	0.5		0.8	4.7	0.5	0.5
mg_h2o-3_oh-1_ch3oh-1_P1	rMgO	2	1	x	x	2.137	2.165	2.139	2.444	2.169	rMgO	r								0.028	0.002	0.307	0.032		0.028	0.002	0.307	0.032
mg_h2o-3_oh-1_ch3oh-1_P1	rMgO	2	3	x	x	2.057	2.071	2.089	2.061	2.054	rMgO	r								0.014	0.032	0.004	-0.003		0.014	0.032	0.004	0.003
mg_h2o-3_oh-1_ch3oh-1_P1	rMgO	2	4	x	x	2.064	2.078	2.042	2.058	2.058	rMgO	r								0.014	-0.022	-0.006	-0.006		0.014	0.022	0.006	0.006
mg_h2o-3_oh-1_ch3oh-1_P1	rMgO	2	5	x	x	1.849	1.866	1.803	1.891	1.866	rMgO	r								0.017	-0.046	0.042	0.017		0.017	0.046	0.042	0.017
mg_h2o-3_oh-1_ch3oh-1_P1	rMgO	2	14	x	x	2.062	2.076	2.045	2.053	2.071	rMgO	r								0.014	-0.017	-0.009	0.009		0.014	0.017	0.009	0.009
mg_h2o-3_oh-1_ch3oh-1_P1	aOMgO	1	2	3	x	82.6	80.3	69.4	71.8	82.6	aOMgO	a								-2.3	-13.2	-10.8	0		2.3	13.2	10.8	0
mg_h2o-3_oh-1_ch3oh-1_P1	aOMgO	1	2	4	x	95.2	96	105.3	83.7	92.1	aOMgO	a								0.8	10.1	-11.5	-3.1		0.8	10.1	11.5	3.1
mg_h2o-3_oh-1_ch3oh-1_P1	aOMgO	1	2	5	x	76.6	75.2	72.4	70.9	77.9	aOMgO	a								-1.4	-4.2	-5.7	1.3		1.4	4.2	5.7	1.3
mg_h2o-3_oh-1_ch3oh-1_P1	aOMgO	1	2	14	x	173.3	173.7	167.8	176.4	172.5	aOMgO	a								0.4	-5.5	3.1	-0.8		0.4	5.5	3.1	0.8
mg_h2o-3_oh-1_ch3oh-1_P1	aOMgO	3	2	4	x	107.7	107.8	110.6	109.9	112.8	aOMgO	a								0.1	2.9	2.2	5.1		0.1	2.9	2.2	5.1
mg_h2o-3_oh-1_ch3oh-1_P1	aOMgO	3	2	5	x	123.2	122.3	114.3	108.5	122.6	aOMgO	a								-0.9	-8.9	-14.7	-0.6		0.9	8.9	14.7	0.6
mg_h2o-3_oh-1_ch3oh-1_P1	aOMgO	3	2	14	x	97.3	98.2	99.7	105	93.7	aOMgO	a								0.9	2.4	7.7	-3.6		0.9	2.4	7.7	3.6
mg_h2o-3_oh-1_ch3oh-1_P1	aOMgO	4	2	5	x	126.1	125.9	130.2	123.6	121.3	aOMgO	a								-0.2	4.1	-2.5	-4.8		0.2	4.1	2.5	4.8
mg_h2o-3_oh-1_ch3oh-1_P1	aOMgO	4	2	14	x	91.3	90.3	72.6	99.1	95.3	aOMgO	a								-1	-18.7	7.8	4		1	18.7	7.8	4
mg_h2o-3_oh-1_ch3oh-1_P1	aOMgO	5	2	14	x	98	100.7	118.5	109.1	98.9	aOMgO	a								2.7	20.5	11.1	0.9		2.7	20.5	11.1	0.9
mg_h2o-4_oh-1_ch3oh-1_P1	rMgO	2	1	x	x	2.148	2.153	2.126	2.175	2.136	rMgO	r								0.005	-0.022	0.027	-0.012		0.005	0.022	0.027	0.012
mg_h2o-4_oh-1_ch3oh-1_P1	rMgO	2	3	x	x	2.088	2.096	2.056	2.113	2.076	rMgO	r								0.008	-0.032	0.025	-0.012		0.008	0.032	0.025	0.012
mg_h2o-4_oh-1_ch3oh-1_P1	rMgO	2	4	x	x	1.933	1.949	1.901	1.994	2.003	rMgO	r								0.016	-0.032	0.061	0.07		0.016	0.032	0.061	0.07
mg_h2o-4_oh-1_ch3oh-1_P1	rMgO	2	5	x	x	2.138	2.159	2.147	2.244	2.122	rMgO	r								0.021	0.009	0.106	-0.016		0.021	0.009	0.106	0.016
mg_h2o-4_oh-1_ch3oh-1_P1	rMgO	2	6	x	x	2.107	2.122	2.14	2.1	2.097	rMgO	r								0.015	0.033	-0.007	-0.01		0.015	0.033	0.007	0.01
mg_h2o-4_oh-1_ch3oh-1_P1	rMgO	2	17	x	x	2.133	2.143	2.063	2.119	2.08	rMgO	r								0.01	-0.07	-0.014	-0.053		0.01	0.07	0.014	0.053
mg_h2o-4_oh-1_ch3oh-1_P1	aOMgO	1	2	3	x	82	81.7	71	88.9	90.5	aOMgO	a								-0.3	-11	6.9	8.5		0.3	11	6.9	8.5
mg_h2o-4_oh-1_ch3oh-1_P1	aOMgO	1	2	4	x	102.2	103	103.2	75.4	76.2	aOMgO	a								0.8	1	-26.8	-26		0.8	1	26.8	26
mg_h2o-4_oh-1_ch3oh-1_P1	aOMgO	1	2	5	x	99	102.1	163	84	85	aOMgO	a								3.1	64	-15	-14		3.1	64	15	14
mg_h2o-4_oh-1_ch3oh-1_P1	aOMgO	1	2	6	x	86.9	85.7	69.5	95.6	86.5	aOMgO	a								-1.2	-17.4	8.7	-0.4		1.2	17.4	8.7	0.4
mg_h2o-4_oh-1_ch3oh-1_P1	aOMgO	1	2	17	x	163	162.2	120.6	163.8	171.5	aOMgO	a								-0.8	-42.4	0.8	8.5		0.8	42.4	0.8	8.5
mg_h2o-4_oh-1_ch3oh-1_P1	aOMgO	3	2	4	x	175.7	175.2	143.6	161.1	166.6	aOMgO	a								-0.5	-32.1	-14.6	-9.1		0.5	32.1	14.6	9.1
mg_h2o-4_oh-1_ch3oh-1_P1	aOMgO	3	2	5	x	101.5	102.4	103.4	94	99.4	aOMgO	a								0.9	1.9	-7.5	-2.1		0.9	1.9	7.5	2.1
mg_h2o-4_oh-1_ch3oh-1_P1	aOMgO	3	2	6	x	99.8	100.2	133.6	95.5	99.6	aOMgO	a								0.4	33.8	-4.3	-0.2		0.4	33.8	4.3	0.2
mg_h2o-4_oh-1_ch3oh-1_P1	aOMgO	3	2	17	x	81.4	80.7	72.6	91	91.1	aOMgO	a								-0.7	-8.8	9.6	9.7		0.7	8.8	9.6	9.7
mg_h2o-4_oh-1_ch3oh-1_P1	aOMgO	4	2	5	x	77	75.9	71.3	74.4	79.6	aOMgO	a								-1.1	-5.7	-2.6	2.6		1.1	5.7	2.6	2.6
mg_h2o-4_oh-1_ch3oh-1_P1	aOMgO	4	2	6	x	81.6	81.3	69.9	96.3	79.9	aOMgO	a								-0.3	-11.7	14.7	-1.7		0.3	11.7	14.7	1.7
mg_h2o-4_oh-1_ch3oh-1_P1	aOMgO	4	2	17	x	94.4	94.6	133	101.2	102.1	aOMgO	a								0.2	38.6	6.8	7.7		0.2	38.6	6.8	7.7
mg_h2o-4_oh-1_ch3oh-1_P1	aOMgO	5	2	6	x	158.5	156.9	121.1	170.5	159.2	aOMgO	a								-1.6	-37.4	12	0.7		1.6	37.4	12	0.7
mg_h2o-4_oh-1_ch3oh-1_P1	aOMgO	5	2	17	x	81.3	79.4	70.7	79.9	86.5	aOMgO	a								-1.9	-10.6	-1.4	5.2		1.9	10.6	1.4	5.2
mg_h2o-4_oh-1_ch3oh-1_P1	aOMgO	6	2	17	x	99.1	99.7	108.5	100.6	101.4	aOMgO	a								0.6	9.4	1.5	2.3		0.6	9.4	1.5	2.3
mg_h2o-3_oh-1_ch3coo-1	rMgO	2	1	x	x	2.209	2.237	2.206	2.432	2.194	rMgO	r								0.028	-0.003	0.223	-0.015		0.028	0.003	0.223	0.015
mg_h2o-3_oh-1_ch3coo-1	rMgO	2	3	x	x	2.161	2.167	2.11	2.111	2.127	rMgO	r								0.006	-0.051	-0.05	-0.034		0.006	0.051	0.05	0.034
mg_h2o-3_oh-1_ch3coo-1	rMgO	2	4	x	x	2.197	2.192	2.145	2.189	2.178	rMgO	r								-0.005	-0.052	-0.008	-0.019		0.005	0.052	0.008	0.019
mg_h2o-3_oh-1_ch3coo-1	rMgO	2	5	x	x	1.971	1.99	1.931	1.993	1.999	rMgO	r								0.019	-0.04	0.022	0.028		0.019	0.04	0.022	0.028
mg_h2o-3_oh-1_ch3coo-1	rMgO	2	14	x	x	2.088	2.099	2.095	2.084	2.058	rMgO	r								0.011	0.007	-0.004	-0.03		0.011	0.007	0.004	0.03
mg_h2o-3_oh-1_ch3coo-1	rMgO	2	15	x	x	2.114	2.135	2.142	2.447	2.121	rMgO	r								0.021	0.028	0.333	0.007		0.021	0.028	0.333	0.007
mg_h2o-3_oh-1_ch3coo-1	aOMgO	1	2	3	x	83.5	79.7	70.2	74.6	82.5	aOMgO	a								-3.8	-13.3	-8.9	-1		3.8	13.3	8.9	1
mg_h2o-3_oh-1_ch3coo-1	aOMgO	1	2	4	x	87.3	87.8	98.1	77.6	82.7	aOMgO	a								0.5	10.8	-9.7	-4.6		0.5	10.8	9.7	4.6
mg_h2o-3_oh-1_ch3coo-1	aOMgO	1	2	5	x	73.9	72.3	68.4	71.2	75.1	aOMgO	a								-1.6	-5.5	-2.7	1.2		1.6	5.5	2.7	1.2
mg_h2o-3_oh-1_ch3coo-1	aOMgO	1	2	14	x	165.8	167.8	164	157.6	160.4	aOMgO	a								2	-1.8	-8.2	-5.4		2	1.8	8.2	5.4
mg_h2o-3_oh-1_ch3coo-1	aOMgO	1	2	15	x	103.5	105.5	108.8	102.4	100.2	aOMgO	a								2	5.3	-1.1	-3.3		2	5.3	1.1	3.3
mg_h2o-3_oh-1_ch3coo-1	aOMgO	3	2	4	x	170.6	167.4	166.8	146.8	165.2	aOMgO	a								-3.2	-3.8	-23.8	-5.4		3.2	3.8	23.8	5.4
mg_h2o-3_oh-1_ch3coo-1	aOMgO	3	2	5	x	100.6	101.9	107.9	111.3	101.3	aOMgO	a								1.3	7.3	10.7	0.7		1.3	7.3	10.7	0.7
mg_h2o-3_oh-1_ch3coo-1	aOMgO	3	2	14	x	98.3	100.8	114.6	103.9	103.9	aOMgO	a								2.5	16.3	5.6	5.6		2.5	16.3	5.6	5.6
mg_h2o-3_oh-1_ch3coo-1	aOMgO	3	2	15	x	81.4	80.6	70.4	69.8	79.6	aOMgO	a								-0.8	-11	-11.6	-1.8		0.8	11	11.6	1.8
mg_h2o-3_oh-1_ch3coo-1	aOMgO	4	2	5	x	75.1	74.5	71.9	75.8	75.6	aOMgO	a								-0.6	-3.2	0.7	0.5		0.6	3.2	0.7	0.5
mg_h2o-3_oh-1_ch3coo-1	aOMgO	4	2	14	x	91.1	91.3	75	94.9	89.9	aOMgO	a								0.2	-16.1	3.8	-1.2		0.2	16.1	3.8	1.2
mg_h2o-3_oh-1_ch3coo-1	aOMgO	4	2	15	x	102.4	102.4	109.2	99.2	102.2	aOMgO	a								0	6.8	-3.2	-0.2		0	6.8	3.2	0.2
mg_h2o-3_oh-1_ch3coo-1	aOMgO	5	2	14	x	119.3	119.1	121.3	127.9	120.6	aOMgO	a								-0.2	2	8.6	1.3		0.2	2	8.6	1.3
mg_h2o-3_oh-1_ch3coo-1	aOMgO	5	2	15	x	176.4	176.2	177.3	172.4	174.9	aOMgO	a								-0.2	0.9	-4	-1.5		0.2	0.9	4	1.5
mg_h2o-3_oh-1_ch3coo-1	aOMgO	14	2	15	x	63.1	62.8	61.5	57.6	63.7	aOMgO	a								-0.3	-1.6	-5.5	0.6		0.3	1.6	5.5	0.6
mg_h2o-4_ch3cooh-1_P2	rMgO	2	1	x	x	2.084	2.1	2.051	2.084	2.065	rMgO	r								0.016	-0.033	0	-0.019		0.016	0.033	0	0.019
mg_h2o-4_ch3cooh-1_P2	rMgO	2	3	x	x	2.079	2.09	2.027	2.109	2.094	rMgO	r								0.011	-0.052	0.03	0.015		0.011	0.052	0.03	0.015
mg_h2o-4_ch3cooh-1_P2	rMgO	2	4	x	x	2.079	2.09	2.047	2.109	2.093	rMgO	r								0.011	-0.032	0.03	0.014		0.011	0.032	0.03	0.014
mg_h2o-4_ch3cooh-1_P2	rMgO	2	5	x	x	2.037	2.051	2.008	2.053	2.036	rMgO	r								0.014	-0.029	0.016	-0.001		0.014	0.029	0.016	0.001
mg_h2o-4_ch3cooh-1_P2	rMgO	2	16	x	x	1.966	1.987	1.935	2.028	1.981	rMgO	r								0.021	-0.031	0.062	0.015		0.021	0.031	0.062	0.015
mg_h2o-4_ch3cooh-1_P2	aOMgO	1	2	3	x	88.4	88.3	73.9	89.1	88.8	aOMgO	a								-0.1	-14.5	0.7	0.4		0.1	14.5	0.7	0.4
mg_h2o-4_ch3cooh-1_P2	aOMgO	1	2	4	x	88.5	88.3	73.9	89.1	88.8	aOMgO	a								-0.2	-14.6	0.6	0.3		0.2	14.6	0.6	0.3
mg_h2o-4_ch3cooh-1_P2	aOMgO	1	2	5	x	104.4	103.2	117.3	112.4	112.7	aOMgO	a								-1.2	12.9	8	8.3		1.2	12.9	8	8.3
mg_h2o-4_ch3cooh-1_P2	aOMgO	1	2	16	x	137.4	139.3	133.5	135.2	133.1	aOMgO	a								1.9	-3.9	-2.2	-4.3		1.9	3.9	2.2	4.3
mg_h2o-4_ch3cooh-1_P2	aOMgO	3	2	4	x	176.6	176.2	142.9	177.5	177.7	aOMgO	a								-0.4	-33.7	0.9	1.1		0.4	33.7	0.9	1.1
mg_h2o-4_ch3cooh-1_P2	aOMgO	3	2	5	x	91	91.3	101.9	91.1	90.4	aOMgO	a								0.3	10.9	0.1	-0.6		0.3	10.9	0.1	0.6
mg_h2o-4_ch3cooh-1_P2	aOMgO	3	2	16	x	90.8	90.7	110.2	90.1	90.8	aOMgO	a								-0.1	19.4	-0.7	0		0.1	19.4	0.7	0
mg_h2o-4_ch3cooh-1_P2	aOMgO	4	2	5	x	91	91.3	109	91.1	90.4	aOMgO	a								0.3	18	0.1	-0.6		0.3	18	0.1	0.6
mg_h2o-4_ch3cooh-1_P2	aOMgO	4	2	16	x	90.7	90.7	80	90.1	90.8	aOMgO	a								0	-10.7	-0.6	0.1		0	10.7	0.6	0.1
mg_h2o-4_ch3cooh-1_P2	aOMgO	5	2	16	x	118.1	117.6	107.2	112.4	114.2	aOMgO	a								-0.5	-10.9	-5.7	-3.9		0.5	10.9	5.7	3.9
mg_h2o-4_oh-1_ch3coo-1	rMgO	2	1	x	x	2.213	2.212	2.197	2.23	2.167	rMgO	r								-0.001	-0.016	0.017	-0.046		0.001	0.016	0.017	0.046
mg_h2o-4_oh-1_ch3coo-1	rMgO	2	3	x	x	2.134	2.142	2.104	2.133	2.115	rMgO	r								0.008	-0.03	-0.001	-0.019		0.008	0.03	0.001	0.019
mg_h2o-4_oh-1_ch3coo-1	rMgO	2	4	x	x	1.982	1.998	1.92	2.041	2.021	rMgO	r								0.016	-0.062	0.059	0.039		0.016	0.062	0.059	0.039
mg_h2o-4_oh-1_ch3coo-1	rMgO	2	5	x	x	2.136	2.142	2.119	2.137	2.113	rMgO	r								0.006	-0.017	0.001	-0.023		0.006	0.017	0.001	0.023
mg_h2o-4_oh-1_ch3coo-1	rMgO	2	6	x	x	2.184	2.187	2.152	2.22	2.163	rMgO	r								0.003	-0.032	0.036	-0.021		0.003	0.032	0.036	0.021
mg_h2o-4_oh-1_ch3coo-1	rMgO	2	18	x	x	2.044	2.059	1.981	2.116	2.057	rMgO	r								0.015	-0.063	0.072	0.013		0.015	0.063	0.072	0.013
mg_h2o-4_oh-1_ch3coo-1	aOMgO	1	2	3	x	87.7	86.6	70.6	87.3	87.5	aOMgO	a								-1.1	-17.1	-0.4	-0.2		1.1	17.1	0.4	0.2
mg_h2o-4_oh-1_ch3coo-1	aOMgO	1	2	4	x	73.7	73.4	69.9	73.4	75.2	aOMgO	a								-0.3	-3.8	-0.3	1.5		0.3	3.8	0.3	1.5
mg_h2o-4_oh-1_ch3coo-1	aOMgO	1	2	5	x	94.2	96	96	100.8	97.4	aOMgO	a								1.8	1.8	6.6	3.2		1.8	1.8	6.6	3.2
mg_h2o-4_oh-1_ch3coo-1	aOMgO	1	2	6	x	87.5	87	94.6	83.8	84	aOMgO	a								-0.5	7.1	-3.7	-3.5		0.5	7.1	3.7	3.5
mg_h2o-4_oh-1_ch3coo-1	aOMgO	1	2	18	x	172.7	170.6	160.2	168.8	170.5	aOMgO	a								-2.1	-12.5	-3.9	-2.2		2.1	12.5	3.9	2.2
mg_h2o-4_oh-1_ch3coo-1	aOMgO	3	2	4	x	160.9	159.8	140.4	160.6	162.7	aOMgO	a								-1.1	-20.5	-0.3	1.8		1.1	20.5	0.3	1.8
mg_h2o-4_oh-1_ch3coo-1	aOMgO	3	2	5	x	83.3	82.5	70	83.6	83.5	aOMgO	a								-0.8	-13.3	0.3	0.2		0.8	13.3	0.3	0.2
mg_h2o-4_oh-1_ch3coo-1	aOMgO	3	2	6	x	100.2	101.8	114.4	103.1	102.5	aOMgO	a								1.6	14.2	2.9	2.3		1.6	14.2	2.9	2.3
mg_h2o-4_oh-1_ch3coo-1	aOMgO	3	2	18	x	87.1	87.4	96.9	88.4	89.2	aOMgO	a								0.3	9.8	1.3	2.1		0.3	9.8	1.3	2.1
mg_h2o-4_oh-1_ch3coo-1	aOMgO	4	2	5	x	101.7	101.8	111.1	100.9	98.9	aOMgO	a								0.1	9.4	-0.8	-2.8		0.1	9.4	0.8	2.8
mg_h2o-4_oh-1_ch3coo-1	aOMgO	4	2	6	x	75.6	75	72.1	74.1	75.8	aOMgO	a								-0.6	-3.5	-1.5	0.2		0.6	3.5	1.5	0.2
mg_h2o-4_oh-1_ch3coo-1	aOMgO	4	2	18	x	111.1	112.1	122	110.4	107.9	aOMgO	a								1	10.9	-0.7	-3.2		1	10.9	0.7	3.2
mg_h2o-4_oh-1_ch3coo-1	aOMgO	5	2	6	x	176.2	174.9	169.4	172.1	173.9	aOMgO	a								-1.3	-6.8	-4.1	-2.3		1.3	6.8	4.1	2.3
mg_h2o-4_oh-1_ch3coo-1	aOMgO	5	2	18	x	90.3	90.4	93.7	89	91	aOMgO	a								0.1	3.4	-1.3	0.7		0.1	3.4	1.3	0.7
mg_h2o-4_oh-1_ch3coo-1	aOMgO	6	2	18	x	88.4	87.2	76.4	87.2	88	aOMgO	a								-1.2	-12	-1.2	-0.4		1.2	12	1.2	0.4
mg_h2o-5_ch3cooh-1_P2	rMgO	2	1	x	x	2.12	2.128	2.084	2.153	2.127	rMgO	r								0.008	-0.036	0.033	0.007		0.008	0.036	0.033	0.007
mg_h2o-5_ch3cooh-1_P2	rMgO	2	3	x	x	2.102	2.114	2.08	2.123	2.102	rMgO	r								0.012	-0.022	0.021	0		0.012	0.022	0.021	0
mg_h2o-5_ch3cooh-1_P2	rMgO	2	4	x	x	2.103	2.115	2.08	2.124	2.103	rMgO	r								0.012	-0.023	0.021	0		0.012	0.023	0.021	0
mg_h2o-5_ch3cooh-1_P2	rMgO	2	5	x	x	2.119	2.13	2.091	2.137	2.114	rMgO	r								0.011	-0.028	0.018	-0.005		0.011	0.028	0.018	0.005
mg_h2o-5_ch3cooh-1_P2	rMgO	2	6	x	x	2.119	2.13	2.051	2.148	2.122	rMgO	r								0.011	-0.068	0.029	0.003		0.011	0.068	0.029	0.003
mg_h2o-5_ch3cooh-1_P2	rMgO	2	19	x	x	2.026	2.043	1.974	2.078	2.053	rMgO	r								0.017	-0.052	0.052	0.027		0.017	0.052	0.052	0.027
mg_h2o-5_ch3cooh-1_P2	aOMgO	1	2	3	x	89.2	89.2	102.5	89.4	89.4	aOMgO	a								0	13.3	0.2	0.2		0	13.3	0.2	0.2
mg_h2o-5_ch3cooh-1_P2	aOMgO	1	2	4	x	89	88.9	71.5	89.2	89.2	aOMgO	a								-0.1	-17.5	0.2	0.2		0.1	17.5	0.2	0.2
mg_h2o-5_ch3cooh-1_P2	aOMgO	1	2	5	x	83.8	83.2	70.5	84.9	85.9	aOMgO	a								-0.6	-13.3	1.1	2.1		0.6	13.3	1.1	2.1
mg_h2o-5_ch3cooh-1_P2	aOMgO	1	2	6	x	84.9	84.6	108.3	86.9	87	aOMgO	a								-0.3	23.4	2	2.1		0.3	23.4	2	2.1
mg_h2o-5_ch3cooh-1_P2	aOMgO	1	2	19	x	177.6	177.4	138	173.9	176.2	aOMgO	a								-0.2	-39.6	-3.7	-1.4		0.2	39.6	3.7	1.4
mg_h2o-5_ch3cooh-1_P2	aOMgO	3	2	4	x	178.2	178.2	139.5	178.4	178.6	aOMgO	a								0	-38.7	0.2	0.4		0	38.7	0.2	0.4
mg_h2o-5_ch3cooh-1_P2	aOMgO	3	2	5	x	90	90	101.9	90.4	90.1	aOMgO	a								0	11.9	0.4	0.1		0	11.9	0.4	0.1
mg_h2o-5_ch3cooh-1_P2	aOMgO	3	2	6	x	90	90	72.3	89.4	89.8	aOMgO	a								0	-17.7	-0.6	-0.2		0	17.7	0.6	0.2
mg_h2o-5_ch3cooh-1_P2	aOMgO	3	2	19	x	90.6	90.6	105.6	90.2	90.4	aOMgO	a								0	15	-0.4	-0.2		0	15	0.4	0.2
mg_h2o-5_ch3cooh-1_P2	aOMgO	4	2	5	x	89.8	89.8	112.6	90.4	90	aOMgO	a								0	22.8	0.6	0.2		0	22.8	0.6	0.2
mg_h2o-5_ch3cooh-1_P2	aOMgO	4	2	6	x	89.8	89.8	72.1	89.6	90	aOMgO	a								0	-17.7	-0.2	0.2		0	17.7	0.2	0.2
mg_h2o-5_ch3cooh-1_P2	aOMgO	4	2	19	x	91.2	91.2	104	91.3	91.1	aOMgO	a								0	12.8	0.1	-0.1		0	12.8	0.1	0.1
mg_h2o-5_ch3cooh-1_P2	aOMgO	5	2	6	x	168.7	167.8	173.8	171.8	172.9	aOMgO	a								-0.9	5.1	3.1	4.2		0.9	5.1	3.1	4.2
mg_h2o-5_ch3cooh-1_P2	aOMgO	5	2	19	x	93.8	94.1	73.6	89	90.3	aOMgO	a								0.3	-20.2	-4.8	-3.5		0.3	20.2	4.8	3.5
mg_h2o-5_ch3cooh-1_P2	aOMgO	6	2	19	x	97.5	98.1	109.7	99.2	96.8	aOMgO	a								0.6	12.2	1.7	-0.7		0.6	12.2	1.7	0.7
mg_h2o-3_oh-1_ochnh2-1_P1	rMgO	2	1	x	x	2.071	2.086	2.118	2.121	2.097	rMgO	r								0.015	0.047	0.05	0.026		0.015	0.047	0.05	0.026
mg_h2o-3_oh-1_ochnh2-1_P1	rMgO	2	3	x	x	1.911	1.929	1.879	1.97	1.938	rMgO	r								0.018	-0.032	0.059	0.027		0.018	0.032	0.059	0.027
mg_h2o-3_oh-1_ochnh2-1_P1	rMgO	2	4	x	x	2.084	2.093	2.042	2.087	2.08	rMgO	r								0.009	-0.042	0.003	-0.004		0.009	0.042	0.003	0.004
mg_h2o-3_oh-1_ochnh2-1_P1	rMgO	2	5	x	x	2.054	2.07	2.107	2.074	2.052	rMgO	r								0.016	0.053	0.02	-0.002		0.016	0.053	0.02	0.002
mg_h2o-3_oh-1_ochnh2-1_P1	rMgO	2	13	x	x	2.017	2.032	1.955	2.088	2.017	rMgO	r								0.015	-0.062	0.071	0		0.015	0.062	0.071	0
mg_h2o-3_oh-1_ochnh2-1_P1	aOMgO	1	2	3	x	79	78.5	72.8	79.7	81.2	aOMgO	a								-0.5	-6.2	0.7	2.2		0.5	6.2	0.7	2.2
mg_h2o-3_oh-1_ochnh2-1_P1	aOMgO	1	2	4	x	90.5	90.6	71.6	91.4	89.3	aOMgO	a								0.1	-18.9	0.9	-1.2		0.1	18.9	0.9	1.2
mg_h2o-3_oh-1_ochnh2-1_P1	aOMgO	1	2	5	x	110.6	109.1	127.4	106.1	108.3	aOMgO	a								-1.5	16.8	-4.5	-2.3		1.5	16.8	4.5	2.3
mg_h2o-3_oh-1_ochnh2-1_P1	aOMgO	1	2	13	x	134.4	136.6	136	139.3	137.5	aOMgO	a								2.2	1.6	4.9	3.1		2.2	1.6	4.9	3.1
mg_h2o-3_oh-1_ochnh2-1_P1	aOMgO	3	2	4	x	167.5	167.5	132.9	170.7	169.1	aOMgO	a								0	-34.6	3.2	1.6		0	34.6	3.2	1.6
mg_h2o-3_oh-1_ochnh2-1_P1	aOMgO	3	2	5	x	80.5	79.4	71.9	79.3	80.5	aOMgO	a								-1.1	-8.6	-1.2	0		1.1	8.6	1.2	0
mg_h2o-3_oh-1_ochnh2-1_P1	aOMgO	3	2	13	x	107.3	107.7	128.6	99.3	101.1	aOMgO	a								0.4	21.3	-8	-6.2		0.4	21.3	8	6.2
mg_h2o-3_oh-1_ochnh2-1_P1	aOMgO	4	2	5	x	97.2	98.9	108.1	100.8	97.6	aOMgO	a								1.7	10.9	3.6	0.4		1.7	10.9	3.6	0.4
mg_h2o-3_oh-1_ochnh2-1_P1	aOMgO	4	2	13	x	84.8	84.4	98.4	89.2	89.4	aOMgO	a								-0.4	13.6	4.4	4.6		0.4	13.6	4.4	4.6
mg_h2o-3_oh-1_ochnh2-1_P1	aOMgO	5	2	13	x	115.1	114.2	96.5	113.7	114	aOMgO	a								-0.9	-18.6	-1.4	-1.1		0.9	18.6	1.4	1.1
mg_h2o-4_oh-1_ochnh2-1_P1	rMgO	2	1	x	x	1.928	1.945	1.88	1.973	1.958	rMgO	r								0.017	-0.048	0.045	0.03		0.017	0.048	0.045	0.03
mg_h2o-4_oh-1_ochnh2-1_P1	rMgO	2	3	x	x	2.186	2.21	2.148	2.431	2.178	rMgO	r								0.024	-0.038	0.245	-0.008		0.024	0.038	0.245	0.008
mg_h2o-4_oh-1_ochnh2-1_P1	rMgO	2	4	x	x	2.112	2.122	2.105	2.089	2.098	rMgO	r								0.01	-0.007	-0.023	-0.014		0.01	0.007	0.023	0.014
mg_h2o-4_oh-1_ochnh2-1_P1	rMgO	2	5	x	x	2.155	2.161	2.107	2.157	2.145	rMgO	r								0.006	-0.048	0.002	-0.01		0.006	0.048	0.002	0.01
mg_h2o-4_oh-1_ochnh2-1_P1	rMgO	2	6	x	x	2.11	2.123	2.114	2.114	2.103	rMgO	r								0.013	0.004	0.004	-0.007		0.013	0.004	0.004	0.007
mg_h2o-4_oh-1_ochnh2-1_P1	rMgO	2	16	x	x	2.083	2.092	2.023	2.155	2.08	rMgO	r								0.009	-0.06	0.072	-0.003		0.009	0.06	0.072	0.003
mg_h2o-4_oh-1_ochnh2-1_P1	aOMgO	1	2	3	x	74.6	73.3	71.3	70.5	75.6	aOMgO	a								-1.3	-3.3	-4.1	1		1.3	3.3	4.1	1
mg_h2o-4_oh-1_ochnh2-1_P1	aOMgO	1	2	4	x	95.5	97.8	110.3	104.1	97.6	aOMgO	a								2.3	14.8	8.6	2.1		2.3	14.8	8.6	2.1
mg_h2o-4_oh-1_ochnh2-1_P1	aOMgO	1	2	5	x	103.9	104.8	126.2	93.3	90.4	aOMgO	a								0.9	22.3	-10.6	-13.5		0.9	22.3	10.6	13.5
mg_h2o-4_oh-1_ochnh2-1_P1	aOMgO	1	2	6	x	171.8	171.4	162.4	159.5	169.9	aOMgO	a								-0.4	-9.4	-12.3	-1.9		0.4	9.4	12.3	1.9
mg_h2o-4_oh-1_ochnh2-1_P1	aOMgO	1	2	16	x	93.1	92.7	93	91.1	95.2	aOMgO	a								-0.4	-0.1	-2	2.1		0.4	0.1	2	2.1
mg_h2o-4_oh-1_ochnh2-1_P1	aOMgO	3	2	4	x	161	160.2	131.8	167.5	169.8	aOMgO	a								-0.8	-29.2	6.5	8.8		0.8	29.2	6.5	8.8
mg_h2o-4_oh-1_ochnh2-1_P1	aOMgO	3	2	5	x	77.6	76	70.3	71.6	80	aOMgO	a								-1.6	-7.3	-6	2.4		1.6	7.3	6	2.4
mg_h2o-4_oh-1_ochnh2-1_P1	aOMgO	3	2	6	x	101.3	102.6	122.1	89.9	94.6	aOMgO	a								1.3	20.8	-11.4	-6.7		1.3	20.8	11.4	6.7
mg_h2o-4_oh-1_ochnh2-1_P1	aOMgO	3	2	16	x	98.4	98.9	110	93.6	93.1	aOMgO	a								0.5	11.6	-4.8	-5.3		0.5	11.6	4.8	5.3
mg_h2o-4_oh-1_ochnh2-1_P1	aOMgO	4	2	5	x	89.4	89.7	72	98	92.7	aOMgO	a								0.3	-17.4	8.6	3.3		0.3	17.4	8.6	3.3
mg_h2o-4_oh-1_ochnh2-1_P1	aOMgO	4	2	6	x	90.3	88.4	70.3	96.3	91.8	aOMgO	a								-1.9	-20	6	1.5		1.9	20	6	1.5
mg_h2o-4_oh-1_ochnh2-1_P1	aOMgO	4	2	16	x	98.3	99.1	117.8	97.8	95	aOMgO	a								0.8	19.5	-0.5	-3.3		0.8	19.5	0.5	3.3
mg_h2o-4_oh-1_ochnh2-1_P1	aOMgO	5	2	6	x	81.8	81.1	71.3	85.9	85.5	aOMgO	a								-0.7	-10.5	4.1	3.7		0.7	10.5	4.1	3.7
mg_h2o-4_oh-1_ochnh2-1_P1	aOMgO	5	2	16	x	160.6	159.2	135.2	162.2	169.9	aOMgO	a								-1.4	-25.4	1.6	9.3		1.4	25.4	1.6	9.3
mg_h2o-4_oh-1_ochnh2-1_P1	aOMgO	6	2	16	x	80.4	80.3	72.3	84.1	87.6	aOMgO	a								-0.1	-8.1	3.7	7.2		0.1	8.1	3.7	7.2
mg_h2o-2_ch3coo-1_ch3cooh-1_P1	rMgO	1	2	x	x	2.04	2.051	2.025	2.171	2.074	rMgO	r								0.011	-0.015	0.131	0.034		0.011	0.015	0.131	0.034
mg_h2o-2_ch3coo-1_ch3cooh-1_P1	rMgO	1	5	x	x	2.046	2.063	2.113	2.131	2.049	rMgO	r								0.017	0.067	0.085	0.003		0.017	0.067	0.085	0.003
mg_h2o-2_ch3coo-1_ch3cooh-1_P1	rMgO	1	6	x	x	1.999	2.014	1.943	2.046	2.018	rMgO	r								0.015	-0.056	0.047	0.019		0.015	0.056	0.047	0.019
mg_h2o-2_ch3coo-1_ch3cooh-1_P1	rMgO	1	16	x	x	2.039	2.054	2.022	2.043	2.028	rMgO	r								0.015	-0.017	0.004	-0.011		0.015	0.017	0.004	0.011
mg_h2o-2_ch3coo-1_ch3cooh-1_P1	aOMgO	2	1	5	x	64.5	64.4	62.3	60.9	64.2	aOMgO	a								-0.1	-2.2	-3.6	-0.3		0.1	2.2	3.6	0.3
mg_h2o-2_ch3coo-1_ch3cooh-1_P1	aOMgO	2	1	6	x	93.4	93.1	92	92.1	93.1	aOMgO	a								-0.3	-1.4	-1.3	-0.3		0.3	1.4	1.3	0.3
mg_h2o-2_ch3coo-1_ch3cooh-1_P1	aOMgO	2	1	16	x	123.5	123.4	130.9	122.6	123.7	aOMgO	a								-0.1	7.4	-0.9	0.2		0.1	7.4	0.9	0.2
mg_h2o-2_ch3coo-1_ch3cooh-1_P1	aOMgO	5	1	6	x	158	157.5	138.9	153	157.3	aOMgO	a								-0.5	-19.1	-5	-0.7		0.5	19.1	5	0.7
mg_h2o-2_ch3coo-1_ch3cooh-1_P1	aOMgO	5	1	16	x	94.8	94.9	72.1	94.7	95	aOMgO	a								0.1	-22.7	-0.1	0.2		0.1	22.7	0.1	0.2
mg_h2o-2_ch3coo-1_ch3cooh-1_P1	aOMgO	6	1	16	x	97.9	98.1	112.6	100.9	98.2	aOMgO	a								0.2	14.7	3	0.3		0.2	14.7	3	0.3
mg_h2o-1_oh-1_ch3oh-1_ochnh2-1_P1	rMgO	2	1	x	x	1.819	1.847	1.834	1.866	1.831	rMgO	r								0.028	0.015	0.047	0.012		0.028	0.015	0.047	0.012
mg_h2o-1_oh-1_ch3oh-1_ochnh2-1_P1	rMgO	2	3	x	x	2.027	2.046	2.054	2.057	2.037	rMgO	r								0.019	0.027	0.03	0.01		0.019	0.027	0.03	0.01
mg_h2o-1_oh-1_ch3oh-1_ochnh2-1_P1	rMgO	2	4	x	x	1.976	1.997	1.96	2.058	1.98	rMgO	r								0.021	-0.016	0.082	0.004		0.021	0.016	0.082	0.004
mg_h2o-1_oh-1_ch3oh-1_ochnh2-1_P1	rMgO	2	9	x	x	2.015	2.029	1.974	2.046	2.012	rMgO	r								0.014	-0.041	0.031	-0.003		0.014	0.041	0.031	0.003
mg_h2o-1_oh-1_ch3oh-1_ochnh2-1_P1	aOMgO	1	2	3	x	84.7	83.6	75.7	111.7	115.5	aOMgO	a								-1.1	-9	27	30.8		1.1	9	27	30.8
mg_h2o-1_oh-1_ch3oh-1_ochnh2-1_P1	aOMgO	1	2	4	x	125.4	110.9	99.3	98.7	103.7	aOMgO	a								-14.5	-26.1	-26.7	-21.7		14.5	26.1	26.7	21.7
mg_h2o-1_oh-1_ch3oh-1_ochnh2-1_P1	aOMgO	1	2	9	x	117.1	133.5	143.3	122.3	114.8	aOMgO	a								16.4	26.2	5.2	-2.3		16.4	26.2	5.2	2.3
mg_h2o-1_oh-1_ch3oh-1_ochnh2-1_P1	aOMgO	3	2	4	x	112.6	118.2	124.8	106.9	106.2	aOMgO	a								5.6	12.2	-5.7	-6.4		5.6	12.2	5.7	6.4
mg_h2o-1_oh-1_ch3oh-1_ochnh2-1_P1	aOMgO	3	2	9	x	111.4	107.3	108	105.6	105.3	aOMgO	a								-4.1	-3.4	-5.8	-6.1		4.1	3.4	5.8	6.1
mg_h2o-1_oh-1_ch3oh-1_ochnh2-1_P1	aOMgO	4	2	9	x	104.3	103.2	106.8	110.8	111.2	aOMgO	a								-1.1	2.5	6.5	6.9		1.1	2.5	6.5	6.9
mg_h2o-2_oh-1_ch3oh-1_ochnh2-1_P1	rMgO	2	1	x	x	2.03	2.045	2.003	2.119	2.036	rMgO	r								0.015	-0.027	0.089	0.006		0.015	0.027	0.089	0.006
mg_h2o-2_oh-1_ch3oh-1_ochnh2-1_P1	rMgO	2	3	x	x	2.105	2.115	2.078	2.133	2.117	rMgO	r								0.01	-0.027	0.028	0.012		0.01	0.027	0.028	0.012
mg_h2o-2_oh-1_ch3oh-1_ochnh2-1_P1	rMgO	2	4	x	x	1.895	1.912	1.851	1.946	1.917	rMgO	r								0.017	-0.044	0.051	0.022		0.017	0.044	0.051	0.022
mg_h2o-2_oh-1_ch3oh-1_ochnh2-1_P1	rMgO	2	5	x	x	2.07	2.084	2.128	2.132	2.103	rMgO	r								0.014	0.058	0.062	0.033		0.014	0.058	0.062	0.033
mg_h2o-2_oh-1_ch3oh-1_ochnh2-1_P1	rMgO	2	12	x	x	2.033	2.045	2	2.057	2.03	rMgO	r								0.012	-0.033	0.024	-0.003		0.012	0.033	0.024	0.003
mg_h2o-2_oh-1_ch3oh-1_ochnh2-1_P1	aOMgO	1	2	3	x	82.6	81.9	76.6	84.1	86.3	aOMgO	a								-0.7	-6	1.5	3.7		0.7	6	1.5	3.7
mg_h2o-2_oh-1_ch3oh-1_ochnh2-1_P1	aOMgO	1	2	4	x	104.1	104.1	96.9	93.3	98.1	aOMgO	a								0	-7.2	-10.8	-6		0	7.2	10.8	6
mg_h2o-2_oh-1_ch3oh-1_ochnh2-1_P1	aOMgO	1	2	5	x	121.1	119.7	116.8	120	118.3	aOMgO	a								-1.4	-4.3	-1.1	-2.8		1.4	4.3	1.1	2.8
mg_h2o-2_oh-1_ch3oh-1_ochnh2-1_P1	aOMgO	1	2	12	x	121.7	123.7	115.3	120.5	119.1	aOMgO	a								2	-6.4	-1.2	-2.6		2	6.4	1.2	2.6
mg_h2o-2_oh-1_ch3oh-1_ochnh2-1_P1	aOMgO	3	2	4	x	171.3	172.2	138.7	162.2	165.9	aOMgO	a								0.9	-32.6	-9.1	-5.4		0.9	32.6	9.1	5.4
mg_h2o-2_oh-1_ch3oh-1_ochnh2-1_P1	aOMgO	3	2	5	x	94.5	96.2	73.8	88.1	87.6	aOMgO	a								1.7	-20.7	-6.4	-6.9		1.7	20.7	6.4	6.9
mg_h2o-2_oh-1_ch3oh-1_ochnh2-1_P1	aOMgO	3	2	12	x	92.4	92.5	100.1	94.3	92.9	aOMgO	a								0.1	7.7	1.9	0.5		0.1	7.7	1.9	0.5
mg_h2o-2_oh-1_ch3oh-1_ochnh2-1_P1	aOMgO	4	2	5	x	77.3	76.6	73.4	77.8	78.4	aOMgO	a								-0.7	-3.9	0.5	1.1		0.7	3.9	0.5	1.1
mg_h2o-2_oh-1_ch3oh-1_ochnh2-1_P1	aOMgO	4	2	12	x	88.9	88.3	118.9	102.1	96.7	aOMgO	a								-0.6	30	13.2	7.8		0.6	30	13.2	7.8
mg_h2o-2_oh-1_ch3oh-1_ochnh2-1_P1	aOMgO	5	2	12	x	117.2	116.7	124	119.4	122.5	aOMgO	a								-0.5	6.8	2.2	5.3		0.5	6.8	2.2	5.3
mg_h2o-3_oh-1_ch3coo-2_M1	rMgO	26	1	x	x	2.138	2.152	2.166	2.187	2.156	rMgO	r								0.014	0.028	0.049	0.018		0.014	0.028	0.049	0.018
mg_h2o-3_oh-1_ch3coo-2_M1	rMgO	26	2	x	x	2.19	2.191	2.184	2.174	2.142	rMgO	r								0.001	-0.006	-0.016	-0.048		0.001	0.006	0.016	0.048
mg_h2o-3_oh-1_ch3coo-2_M1	rMgO	26	3	x	x	2.311	2.305	2.248	2.448	2.245	rMgO	r								-0.006	-0.063	0.137	-0.066		0.006	0.063	0.137	0.066
mg_h2o-3_oh-1_ch3coo-2_M1	rMgO	26	4	x	x	1.985	2.008	1.972	2.083	2.038	rMgO	r								0.023	-0.013	0.098	0.053		0.023	0.013	0.098	0.053
mg_h2o-3_oh-1_ch3coo-2_M1	rMgO	26	14	x	x	2.098	2.111	2.018	2.132	2.121	rMgO	r								0.013	-0.08	0.034	0.023		0.013	0.08	0.034	0.023
mg_h2o-3_oh-1_ch3coo-2_M1	rMgO	26	21	x	x	2.099	2.108	2.016	2.153	2.119	rMgO	r								0.009	-0.083	0.054	0.02		0.009	0.083	0.054	0.02
mg_h2o-3_oh-1_ch3coo-2_M1	aOMgO	1	26	2	x	103	104.2	112.8	115.1	104.1	aOMgO	a								1.2	9.8	12.1	1.1		1.2	9.8	12.1	1.1
mg_h2o-3_oh-1_ch3coo-2_M1	aOMgO	1	26	3	x	93	92.3	89.6	85	90.2	aOMgO	a								-0.7	-3.4	-8	-2.8		0.7	3.4	8	2.8
mg_h2o-3_oh-1_ch3coo-2_M1	aOMgO	1	26	4	x	81.5	79.5	70.2	75.5	78.9	aOMgO	a								-2	-11.3	-6	-2.6		2	11.3	6	2.6
mg_h2o-3_oh-1_ch3coo-2_M1	aOMgO	1	26	14	x	165.8	164.9	149.2	150.6	164.2	aOMgO	a								-0.9	-16.6	-15.2	-1.6		0.9	16.6	15.2	1.6
mg_h2o-3_oh-1_ch3coo-2_M1	aOMgO	1	26	21	x	83.8	84.3	89.2	86.3	85	aOMgO	a								0.5	5.4	2.5	1.2		0.5	5.4	2.5	1.2
mg_h2o-3_oh-1_ch3coo-2_M1	aOMgO	2	26	3	x	162.1	161.3	154	155	162.5	aOMgO	a								-0.8	-8.1	-7.1	0.4		0.8	8.1	7.1	0.4
mg_h2o-3_oh-1_ch3coo-2_M1	aOMgO	2	26	4	x	77	76.2	70.4	75	76.9	aOMgO	a								-0.8	-6.6	-2	-0.1		0.8	6.6	2	0.1
mg_h2o-3_oh-1_ch3coo-2_M1	aOMgO	2	26	14	x	91.1	90.9	94.3	93.1	91.6	aOMgO	a								-0.2	3.2	2	0.5		0.2	3.2	2	0.5
mg_h2o-3_oh-1_ch3coo-2_M1	aOMgO	2	26	21	x	95.6	95.5	95.2	93.4	94	aOMgO	a								-0.1	-0.4	-2.2	-1.6		0.1	0.4	2.2	1.6
mg_h2o-3_oh-1_ch3coo-2_M1	aOMgO	3	26	4	x	113.9	116	132.5	126.9	116.3	aOMgO	a								2.1	18.6	13	2.4		2.1	18.6	13	2.4
mg_h2o-3_oh-1_ch3coo-2_M1	aOMgO	3	26	14	x	72.8	72.7	68.6	70.6	74.7	aOMgO	a								-0.1	-4.2	-2.2	1.9		0.1	4.2	2.2	1.9
mg_h2o-3_oh-1_ch3coo-2_M1	aOMgO	3	26	21	x	77.9	77.3	71.1	72.1	77	aOMgO	a								-0.6	-6.8	-5.8	-0.9		0.6	6.8	5.8	0.9
mg_h2o-3_oh-1_ch3coo-2_M1	aOMgO	4	26	14	x	103.9	105.2	108.1	105.7	103.3	aOMgO	a								1.3	4.2	1.8	-0.6		1.3	4.2	1.8	0.6
mg_h2o-3_oh-1_ch3coo-2_M1	aOMgO	4	26	21	x	161.5	159.2	146.3	151.3	158.8	aOMgO	a								-2.3	-15.2	-10.2	-2.7		2.3	15.2	10.2	2.7
mg_h2o-3_oh-1_ch3coo-2_M1	aOMgO	14	26	21	x	93	93.8	103.1	101.1	96	aOMgO	a								0.8	10.1	8.1	3		0.8	10.1	8.1	3
mg_h2o-3_oh-1_ch3oh-1_ochnh2-1_P1	rMgO	2	1	x	x	2.09	2.098	2.043	2.177	2.099	rMgO	r								0.008	-0.047	0.087	0.009		0.008	0.047	0.087	0.009
mg_h2o-3_oh-1_ch3oh-1_ochnh2-1_P1	rMgO	2	3	x	x	1.93	1.947	1.883	1.975	1.966	rMgO	r								0.017	-0.047	0.045	0.036		0.017	0.047	0.045	0.036
mg_h2o-3_oh-1_ch3oh-1_ochnh2-1_P1	rMgO	2	4	x	x	2.111	2.125	2.114	2.126	2.105	rMgO	r								0.014	0.003	0.015	-0.006		0.014	0.003	0.015	0.006
mg_h2o-3_oh-1_ch3oh-1_ochnh2-1_P1	rMgO	2	5	x	x	2.198	2.22	2.179	2.43	2.151	rMgO	r								0.022	-0.019	0.232	-0.047		0.022	0.019	0.232	0.047
mg_h2o-3_oh-1_ch3oh-1_ochnh2-1_P1	rMgO	2	6	x	x	2.111	2.122	2.102	2.093	2.114	rMgO	r								0.011	-0.009	-0.018	0.003		0.011	0.009	0.018	0.003
mg_h2o-3_oh-1_ch3oh-1_ochnh2-1_P1	rMgO	2	15	x	x	2.141	2.147	2.077	2.131	2.103	rMgO	r								0.006	-0.064	-0.01	-0.038		0.006	0.064	0.01	0.038
mg_h2o-3_oh-1_ch3oh-1_ochnh2-1_P1	aOMgO	1	2	3	x	92.7	92.3	93.2	89.9	95.4	aOMgO	a								-0.4	0.5	-2.8	2.7		0.4	0.5	2.8	2.7
mg_h2o-3_oh-1_ch3oh-1_ochnh2-1_P1	aOMgO	1	2	4	x	80.2	80.1	72.5	81	87.6	aOMgO	a								-0.1	-7.7	0.8	7.4		0.1	7.7	0.8	7.4
mg_h2o-3_oh-1_ch3oh-1_ochnh2-1_P1	aOMgO	1	2	5	x	97.1	97.7	101.5	93.5	92.3	aOMgO	a								0.6	4.4	-3.6	-4.8		0.6	4.4	3.6	4.8
mg_h2o-3_oh-1_ch3oh-1_ochnh2-1_P1	aOMgO	1	2	6	x	96.9	97.4	103.9	95.7	89.7	aOMgO	a								0.5	7	-1.2	-7.2		0.5	7	1.2	7.2
mg_h2o-3_oh-1_ch3oh-1_ochnh2-1_P1	aOMgO	1	2	15	x	160.4	159.1	131.6	160.7	176.3	aOMgO	a								-1.3	-28.8	0.3	15.9		1.3	28.8	0.3	15.9
mg_h2o-3_oh-1_ch3oh-1_ochnh2-1_P1	aOMgO	3	2	4	x	171.2	170.8	163.1	159.1	167.2	aOMgO	a								-0.4	-8.1	-12.1	-4		0.4	8.1	12.1	4
mg_h2o-3_oh-1_ch3oh-1_ochnh2-1_P1	aOMgO	3	2	5	x	74.3	73	70.5	70.7	76.4	aOMgO	a								-1.3	-3.8	-3.6	2.1		1.3	3.8	3.6	2.1
mg_h2o-3_oh-1_ch3oh-1_ochnh2-1_P1	aOMgO	3	2	6	x	95.8	98.1	105.4	102.7	99	aOMgO	a								2.3	9.6	6.9	3.2		2.3	9.6	6.9	3.2
mg_h2o-3_oh-1_ch3oh-1_ochnh2-1_P1	aOMgO	3	2	15	x	103.6	104.6	124.4	97.5	87.1	aOMgO	a								1	20.8	-6.1	-16.5		1	20.8	6.1	16.5
mg_h2o-3_oh-1_ch3oh-1_ochnh2-1_P1	aOMgO	4	2	5	x	101.3	102.7	120.3	91	91	aOMgO	a								1.4	19	-10.3	-10.3		1.4	19	10.3	10.3
mg_h2o-3_oh-1_ch3oh-1_ochnh2-1_P1	aOMgO	4	2	6	x	90.2	88.1	70.6	96.9	93.5	aOMgO	a								-2.1	-19.6	6.7	3.3		2.1	19.6	6.7	3.3
mg_h2o-3_oh-1_ch3oh-1_ochnh2-1_P1	aOMgO	4	2	15	x	82.5	81.9	72.6	86	89.4	aOMgO	a								-0.6	-9.9	3.5	6.9		0.6	9.9	3.5	6.9
mg_h2o-3_oh-1_ch3oh-1_ochnh2-1_P1	aOMgO	5	2	6	x	163.2	162.7	154.5	168.7	175.2	aOMgO	a								-0.5	-8.7	5.5	12		0.5	8.7	5.5	12
mg_h2o-3_oh-1_ch3oh-1_ochnh2-1_P1	aOMgO	5	2	15	x	77.3	76.1	69.7	72.4	85.6	aOMgO	a								-1.2	-7.6	-4.9	8.3		1.2	7.6	4.9	8.3
mg_h2o-3_oh-1_ch3oh-1_ochnh2-1_P1	aOMgO	6	2	15	x	92.3	92.4	94.8	100	92.7	aOMgO	a								0.1	2.5	7.7	0.4		0.1	2.5	7.7	0.4
mg_adp_h2o-4	rMgO	9	7	x	x	2.033	2.042	2.064	2.451	2.1	rMgO	r								0.009	0.031	0.418	0.067		0.009	0.031	0.418	0.067
mg_adp_h2o-4	rMgO	9	8	x	x	2.028	2.037	2.174	2.043	2.082	rMgO	r								0.009	0.146	0.015	0.054		0.009	0.146	0.015	0.054
mg_adp_h2o-4	rMgO	9	15	x	x	2.125	2.129	2.085	2.093	2.093	rMgO	r								0.004	-0.04	-0.032	-0.032		0.004	0.04	0.032	0.032
mg_adp_h2o-4	rMgO	9	18	x	x	2.13	2.137	2.087	2.093	2.093	rMgO	r								0.007	-0.043	-0.037	-0.037		0.007	0.043	0.037	0.037
mg_adp_h2o-4	rMgO	9	21	x	x	2.142	2.147	2.109	2.118	2.1	rMgO	r								0.005	-0.033	-0.024	-0.042		0.005	0.033	0.024	0.042
mg_adp_h2o-4	rMgO	9	24	x	x	2.142	2.148	2.083	2.195	2.153	rMgO	r								0.006	-0.059	0.053	0.011		0.006	0.059	0.053	0.011
mg_adp_h2o-4	rOP	7	4	x	x	1.537	1.548	1.548	1.55	1.552	rOP	r								0.011	0.011	0.013	0.015		0.011	0.011	0.013	0.015
mg_adp_h2o-4	rOP	1	4	x	x	1.64	1.655	1.674	1.632	1.653	rOP	r								0.015	0.034	-0.008	0.013		0.015	0.034	0.008	0.013
mg_adp_h2o-4	rOP	6	4	x	x	1.604	1.615	1.692	1.585	1.584	rOP	r								0.011	0.088	-0.019	-0.02		0.011	0.088	0.019	0.02
mg_adp_h2o-4	rOP	5	4	x	x	1.489	1.498	1.46	1.525	1.489	rOP	r								0.009	-0.029	0.036	0		0.009	0.029	0.036	0
mg_adp_h2o-4	rOP	8	2	x	x	1.528	1.538	1.552	1.551	1.54	rOP	r								0.01	0.024	0.023	0.012		0.01	0.024	0.023	0.012
mg_adp_h2o-4	rOP	10	2	x	x	1.594	1.606	1.629	1.597	1.588	rOP	r								0.012	0.035	0.003	-0.006		0.012	0.035	0.003	0.006
mg_adp_h2o-4	rOP	1	2	x	x	1.645	1.661	1.656	1.648	1.657	rOP	r								0.016	0.011	0.003	0.012		0.016	0.011	0.003	0.012
mg_adp_h2o-4	rOP	3	2	x	x	1.496	1.506	1.521	1.511	1.501	rOP	r								0.01	0.025	0.015	0.005		0.01	0.025	0.015	0.005
mg_adp_h2o-4	rCO	11	10	x	x	1.438	1.443	1.455	1.447	1.423	rCO	r								0.005	0.017	0.009	-0.015		0.005	0.017	0.009	0.015
mg_adp_h2o-4	aOpMgOp	7	9	8	x	91.6	92.2	91.8	85.2	92	aOpMgOp	a								0.6	0.2	-6.4	0.4		0.6	0.2	6.4	0.4
mg_adp_h2o-4	aOMgO	18	9	7	x	78	77.5	70.4	70.7	80.7	aOMgO	a								-0.5	-7.6	-7.3	2.7		0.5	7.6	7.3	2.7
mg_adp_h2o-4	aOMgO	18	9	24	x	96	96.3	105.5	83.4	85.8	aOMgO	a								0.3	9.5	-12.6	-10.2		0.3	9.5	12.6	10.2
mg_adp_h2o-4	aOMgO	18	9	21	x	94.3	94	96.4	99.3	97.8	aOMgO	a								-0.3	2.1	5	3.5		0.3	2.1	5	3.5
mg_adp_h2o-4	aOMgO	18	9	15	x	92.5	92.4	127.8	114.1	105.2	aOMgO	a								-0.1	35.3	21.6	12.7		0.1	35.3	21.6	12.7
mg_adp_h2o-4	aOMgO	18	9	8	x	166	166	158.3	151.4	172.6	aOMgO	a								0	-7.7	-14.6	6.6		0	7.7	14.6	6.6
mg_adp_h2o-4	aOMgO	21	9	7	x	97.1	96.3	89.1	68.9	81.8	aOMgO	a								-0.8	-8	-28.2	-15.3		0.8	8	28.2	15.3
mg_adp_h2o-4	aOMgO	21	9	15	x	88.6	88.9	97.8	100.8	97.4	aOMgO	a								0.3	9.2	12.2	8.8		0.3	9.2	12.2	8.8
mg_adp_h2o-4	aOMgO	21	9	24	x	165.8	166.2	157.7	172.5	174.4	aOMgO	a								0.4	-8.1	6.7	8.6		0.4	8.1	6.7	8.6
mg_adp_h2o-4	aOMgO	21	9	8	x	77.5	77.6	70.3	85.5	82.2	aOMgO	a								0.1	-7.2	8	4.7		0.1	7.2	8	4.7
mg_adp_h2o-4	aOMgO	15	9	24	x	81.3	81.4	72.2	84.3	85.7	aOMgO	a								0.1	-9.1	3	4.4		0.1	9.1	3	4.4
mg_adp_h2o-4	aOMgO	15	9	7	x	169.3	169	159.1	169.5	174.1	aOMgO	a								-0.3	-10.2	0.2	4.8		0.3	10.2	0.2	4.8
mg_adp_h2o-4	aOMgO	15	9	8	x	98.6	98.4	72.4	92.3	82.1	aOMgO	a								-0.2	-26.2	-6.3	-16.5		0.2	26.2	6.3	16.5
mg_adp_h2o-4	aOMgO	24	9	7	x	94.6	95	94.2	105.8	94.7	aOMgO	a								0.4	-0.4	11.2	0.1		0.4	0.4	11.2	0.1
mg_adp_h2o-4	aOMgO	24	9	8	x	94.1	94	87.5	88.8	93.6	aOMgO	a								-0.1	-6.6	-5.3	-0.5		0.1	6.6	5.3	0.5
mg_adp_h2o-4	aOPO	7	4	1	x	105.6	105.4	106.5	106.9	104.9	aOPO	a								-0.2	0.9	1.3	-0.7		0.2	0.9	1.3	0.7
mg_adp_h2o-4	aOPO	8	2	1	x	106.9	107	107.7	105.7	106.1	aOPO	a								0.1	0.8	-1.2	-0.8		0.1	0.8	1.2	0.8
mg_adp_h2o-4	aOPO	6	4	5	x	110.3	110.6	113.8	111.2	112.3	aOPO	a								0.3	3.5	0.9	2		0.3	3.5	0.9	2
mg_adp_h2o-4	aOPO	6	4	7	x	110	110	98	112.2	110.1	aOPO	a								0	-12	2.2	0.1		0	12	2.2	0.1
mg_adp_h2o-4	aOPO	6	4	1	x	101.2	100.6	97.2	103.2	102.4	aOPO	a								-0.6	-4	2	1.2		0.6	4	2	1.2
mg_adp_h2o-4	aOPO	5	4	7	x	116.2	116.1	125.5	112.3	114.2	aOPO	a								-0.1	9.3	-3.9	-2		0.1	9.3	3.9	2
mg_adp_h2o-4	aOPO	5	4	1	x	112.5	113	111.6	110.6	112	aOPO	a								0.5	-0.9	-1.9	-0.5		0.5	0.9	1.9	0.5
mg_adp_h2o-4	aOPO	8	2	3	x	116.2	116.2	111.3	115.1	114.4	aOPO	a								0	-4.9	-1.1	-1.8		0	4.9	1.1	1.8
mg_adp_h2o-4	aOPO	8	2	10	x	107.1	107.2	110.3	106.5	106.7	aOPO	a								0.1	3.2	-0.6	-0.4		0.1	3.2	0.6	0.4
mg_adp_h2o-4	aOPO	3	2	10	x	113.8	113.9	115.6	115.3	115.7	aOPO	a								0.1	1.8	1.5	1.9		0.1	1.8	1.5	1.9
mg_adp_h2o-4	aPOP	2	1	4	x	127.8	127.1	131.6	135.8	132.7	aPOP	a								-0.7	3.8	8	4.9		0.7	3.8	8	4.9
mg_adp_h2o-4	aCOP	11	10	2	x	119.8	119.2	112.7	121.4	122.3	aCOP	a								-0.6	-7.1	1.6	2.5		0.6	7.1	1.6	2.5
mg_phos-1_h2o-5_P1	rMgO	1	5	x	x	1.993	2.008	2.055	2.065	2.05	rMgO	r								0.015	0.062	0.072	0.057		0.015	0.062	0.072	0.057
mg_phos-1_h2o-5_P1	rMgO	1	7	x	x	2.072	2.092	2.016	2.107	2.082	rMgO	r								0.02	-0.056	0.035	0.01		0.02	0.056	0.035	0.01
mg_phos-1_h2o-5_P1	rMgO	1	10	x	x	2.129	2.129	2.115	2.157	2.13	rMgO	r								0	-0.014	0.028	0.001		0	0.014	0.028	0.001
mg_phos-1_h2o-5_P1	rMgO	1	15	x	x	2.116	2.125	2.038	2.113	2.091	rMgO	r								0.009	-0.078	-0.003	-0.025		0.009	0.078	0.003	0.025
mg_phos-1_h2o-5_P1	rMgO	1	18	x	x	2.13	2.14	2.073	2.138	2.102	rMgO	r								0.01	-0.057	0.008	-0.028		0.01	0.057	0.008	0.028
mg_phos-1_h2o-5_P1	rMgO	1	21	x	x	2.128	2.136	2.101	2.145	2.118	rMgO	r								0.008	-0.027	0.017	-0.01		0.008	0.027	0.017	0.01
mg_phos-1_h2o-5_P1	rOP	2	3	x	x	1.644	1.659	1.636	1.633	1.634	rOP	r								0.015	-0.008	-0.011	-0.01		0.015	0.008	0.011	0.01
mg_phos-1_h2o-5_P1	rOP	4	3	x	x	1.495	1.504	1.516	1.507	1.494	rOP	r								0.009	0.021	0.012	-0.001		0.009	0.021	0.012	0.001
mg_phos-1_h2o-5_P1	rOP	5	3	x	x	1.528	1.538	1.556	1.552	1.539	rOP	r								0.01	0.028	0.024	0.011		0.01	0.028	0.024	0.011
mg_phos-1_h2o-5_P1	rOP	6	3	x	x	1.592	1.602	1.632	1.58	1.577	rOP	r								0.01	0.04	-0.012	-0.015		0.01	0.04	0.012	0.015
mg_phos-1_h2o-5_P1	aOMgO	5	1	7	x	93	92.7	93.2	96.4	94.3	aOMgO	a								-0.3	0.2	3.4	1.3		0.3	0.2	3.4	1.3
mg_phos-1_h2o-5_P1	aOMgO	5	1	10	x	87.4	87.5	70.8	85.5	86.3	aOMgO	a								0.1	-16.6	-1.9	-1.1		0.1	16.6	1.9	1.1
mg_phos-1_h2o-5_P1	aOMgO	5	1	15	x	171.1	171.5	141.2	169.9	171.8	aOMgO	a								0.4	-29.9	-1.2	0.7		0.4	29.9	1.2	0.7
mg_phos-1_h2o-5_P1	aOMgO	5	1	18	x	99.7	99.8	122.6	84.4	89.6	aOMgO	a								0.1	22.9	-15.3	-10.1		0.1	22.9	15.3	10.1
mg_phos-1_h2o-5_P1	aOMgO	5	1	21	x	80.6	80	71.6	82.5	80.7	aOMgO	a								-0.6	-9	1.9	0.1		0.6	9	1.9	0.1
mg_phos-1_h2o-5_P1	aOMgO	7	1	10	x	97	97.8	119.9	92.1	91	aOMgO	a								0.8	22.9	-4.9	-6		0.8	22.9	4.9	6
mg_phos-1_h2o-5_P1	aOMgO	7	1	15	x	95.7	95.7	112.2	93.1	94	aOMgO	a								0	16.5	-2.6	-1.7		0	16.5	2.6	1.7
mg_phos-1_h2o-5_P1	aOMgO	7	1	18	x	83.1	81.9	73.4	86.9	88	aOMgO	a								-1.2	-9.7	3.8	4.9		1.2	9.7	3.8	4.9
mg_phos-1_h2o-5_P1	aOMgO	7	1	21	x	166.4	164.6	125.9	178.6	174.9	aOMgO	a								-1.8	-40.5	12.2	8.5		1.8	40.5	12.2	8.5
mg_phos-1_h2o-5_P1	aOMgO	10	1	15	x	89.6	90.9	71.2	97.5	93.6	aOMgO	a								1.3	-18.4	7.9	4		1.3	18.4	7.9	4
mg_phos-1_h2o-5_P1	aOMgO	10	1	18	x	172.9	172.6	162.3	169.7	175.7	aOMgO	a								-0.3	-10.6	-3.2	2.8		0.3	10.6	3.2	2.8
mg_phos-1_h2o-5_P1	aOMgO	10	1	21	x	94.7	95.4	103.8	86.9	89.8	aOMgO	a								0.7	9.1	-7.8	-4.9		0.7	9.1	7.8	4.9
mg_phos-1_h2o-5_P1	aOMgO	15	1	18	x	83.3	81.8	93.5	92.7	90.7	aOMgO	a								-1.5	10.2	9.4	7.4		1.5	10.2	9.4	7.4
mg_phos-1_h2o-5_P1	aOMgO	15	1	21	x	91.2	91.9	111	88	91	aOMgO	a								0.7	19.8	-3.2	-0.2		0.7	19.8	3.2	0.2
mg_phos-1_h2o-5_P1	aOMgO	18	1	21	x	86.1	86	72.9	93.8	90.9	aOMgO	a								-0.1	-13.2	7.7	4.8		0.1	13.2	7.7	4.8
mg_phos-1_h2o-5_P1	aMgOP	1	5	3	x	123.5	122.8	129.6	121.2	122.6	aMgOP	a								-0.7	6.1	-2.3	-0.9		0.7	6.1	2.3	0.9
mg_phos-1_h2o-5_P1	aOPO	2	3	4	x	110.9	110.8	111.7	110	110	aOPO	a								-0.1	0.8	-0.9	-0.9		0.1	0.8	0.9	0.9
mg_phos-1_h2o-5_P1	aOPO	2	3	5	x	101.6	101.2	111.1	102.7	102.7	aOPO	a								-0.4	9.5	1.1	1.1		0.4	9.5	1.1	1.1
mg_phos-1_h2o-5_P1	aOPO	2	3	6	x	105.6	105.4	101.5	106.1	105.6	aOPO	a								-0.2	-4.1	0.5	0		0.2	4.1	0.5	0
mg_phos-1_h2o-5_P1	aOPO	4	3	5	x	116.9	117.2	111.8	114.6	115	aOPO	a								0.3	-5.1	-2.3	-1.9		0.3	5.1	2.3	1.9
mg_phos-1_h2o-5_P1	aOPO	4	3	6	x	109.4	109.7	116.8	111.9	112.1	aOPO	a								0.3	7.4	2.5	2.7		0.3	7.4	2.5	2.7
mg_atp_h2o-3_M1	rMgO	17	7	x	x	2.035	2.06	2.117	2.431	2.135	rMgO	r								0.025	0.082	0.396	0.1		0.025	0.082	0.396	0.1
mg_atp_h2o-3_M1	rMgO	17	8	x	x	2.058	2.057	2.228	2.11	2.099	rMgO	r								-0.001	0.17	0.052	0.041		0.001	0.17	0.052	0.041
mg_atp_h2o-3_M1	rMgO	17	14	x	x	2.063	2.067	2.097	2.11	2.1	rMgO	r								0.004	0.034	0.047	0.037		0.004	0.034	0.047	0.037
mg_atp_h2o-3_M1	rMgO	17	18	x	x	2.165	2.16	2.115	2.15	2.147	rMgO	r								-0.005	-0.05	-0.015	-0.018		0.005	0.05	0.015	0.018
mg_atp_h2o-3_M1	rMgO	17	21	x	x	2.173	2.178	2.085	2.147	2.12	rMgO	r								0.005	-0.088	-0.026	-0.053		0.005	0.088	0.026	0.053
mg_atp_h2o-3_M1	rMgO	17	24	x	x	2.191	2.207	2.066	2.149	2.146	rMgO	r								0.016	-0.125	-0.042	-0.045		0.016	0.125	0.042	0.045
mg_atp_h2o-3_M1	rOP	1	2	x	x	1.635	1.653	1.648	1.629	1.644	rOP	r								0.018	0.013	-0.006	0.009		0.018	0.013	0.006	0.009
mg_atp_h2o-3_M1	rOP	3	2	x	x	1.502	1.509	1.51	1.52	1.507	rOP	r								0.007	0.008	0.018	0.005		0.007	0.008	0.018	0.005
mg_atp_h2o-3_M1	rOP	8	2	x	x	1.519	1.53	1.554	1.544	1.53	rOP	r								0.011	0.035	0.025	0.011		0.011	0.035	0.025	0.011
mg_atp_h2o-3_M1	rOP	9	2	x	x	1.611	1.623	1.647	1.615	1.609	rOP	r								0.012	0.036	0.004	-0.002		0.012	0.036	0.004	0.002
mg_atp_h2o-3_M1	rOP	1	4	x	x	1.649	1.66	1.697	1.65	1.659	rOP	r								0.011	0.048	0.001	0.01		0.011	0.048	0.001	0.01
mg_atp_h2o-3_M1	rOP	5	4	x	x	1.474	1.483	1.465	1.483	1.468	rOP	r								0.009	-0.009	0.009	-0.006		0.009	0.009	0.009	0.006
mg_atp_h2o-3_M1	rOP	6	4	x	x	1.653	1.666	1.647	1.651	1.662	rOP	r								0.013	-0.006	-0.002	0.009		0.013	0.006	0.002	0.009
mg_atp_h2o-3_M1	rOP	7	4	x	x	1.526	1.538	1.558	1.558	1.549	rOP	r								0.012	0.032	0.032	0.023		0.012	0.032	0.032	0.023
mg_atp_h2o-3_M1	rOP	6	13	x	x	1.629	1.644	1.674	1.622	1.635	rOP	r								0.015	0.045	-0.007	0.006		0.015	0.045	0.007	0.006
mg_atp_h2o-3_M1	rOP	14	13	x	x	1.518	1.527	1.572	1.544	1.528	rOP	r								0.009	0.054	0.026	0.01		0.009	0.054	0.026	0.01
mg_atp_h2o-3_M1	rOP	15	13	x	x	1.506	1.515	1.47	1.521	1.508	rOP	r								0.009	-0.036	0.015	0.002		0.009	0.036	0.015	0.002
mg_atp_h2o-3_M1	rOP	16	13	x	x	1.619	1.629	1.649	1.605	1.606	rOP	r								0.01	0.03	-0.014	-0.013		0.01	0.03	0.014	0.013
mg_atp_h2o-3_M1	rCO	10	9	x	x	1.428	1.433	1.447	1.44	1.413	rCO	r								0.005	0.019	0.012	-0.015		0.005	0.019	0.012	0.015
mg_atp_h2o-3_M1	aOMgO	7	17	8	x	96.3	96.3	89.8	97	98.3	aOMgO	a								0	-6.5	0.7	2		0	6.5	0.7	2
mg_atp_h2o-3_M1	aOMgO	7	17	14	x	95.3	95	87.6	96.6	97.9	aOMgO	a								-0.3	-7.7	1.3	2.6		0.3	7.7	1.3	2.6
mg_atp_h2o-3_M1	aOMgO	7	17	18	x	85.9	85.5	74.1	69.1	76.6	aOMgO	a								-0.4	-11.8	-16.8	-9.3		0.4	11.8	16.8	9.3
mg_atp_h2o-3_M1	aOMgO	7	17	21	x	173.6	173	153.4	173.2	176.5	aOMgO	a								-0.6	-20.2	-0.4	2.9		0.6	20.2	0.4	2.9
mg_atp_h2o-3_M1	aOMgO	7	17	24	x	80.8	77.3	74.4	69.1	76.6	aOMgO	a								-3.5	-6.4	-11.7	-4.2		3.5	6.4	11.7	4.2
mg_atp_h2o-3_M1	aOMgO	8	17	14	x	89.9	90.7	87.4	89.8	90.3	aOMgO	a								0.8	-2.5	-0.1	0.4		0.8	2.5	0.1	0.4
mg_atp_h2o-3_M1	aOMgO	8	17	18	x	175.1	176.3	153.6	165	172.9	aOMgO	a								1.2	-21.5	-10.1	-2.2		1.2	21.5	10.1	2.2
mg_atp_h2o-3_M1	aOMgO	8	17	21	x	79.2	78.8	71	78.4	79.4	aOMgO	a								-0.4	-8.2	-0.8	0.2		0.4	8.2	0.8	0.2
mg_atp_h2o-3_M1	aOMgO	8	17	24	x	87.4	88.1	91.7	86.4	85.8	aOMgO	a								0.7	4.3	-1	-1.6		0.7	4.3	1	1.6
mg_atp_h2o-3_M1	aOMgO	14	17	18	x	85.5	86	71.4	86.3	85.7	aOMgO	a								0.5	-14.1	0.8	0.2		0.5	14.1	0.8	0.2
mg_atp_h2o-3_M1	aOMgO	14	17	21	x	80.3	80.2	73.7	78.5	79.5	aOMgO	a								-0.1	-6.6	-1.8	-0.8		0.1	6.6	1.8	0.8
mg_atp_h2o-3_M1	aOMgO	14	17	24	x	174.9	172	162	164.5	172.7	aOMgO	a								-2.9	-12.9	-10.4	-2.2		2.9	12.9	10.4	2.2
mg_atp_h2o-3_M1	aOMgO	18	17	21	x	98.3	99.1	115.7	114.9	105.4	aOMgO	a								0.8	17.4	16.6	7.1		0.8	17.4	16.6	7.1
mg_atp_h2o-3_M1	aOMgO	18	17	24	x	97.3	95.4	103.6	93.5	97.5	aOMgO	a								-1.9	6.3	-3.8	0.2		1.9	6.3	3.8	0.2
mg_atp_h2o-3_M1	aOMgO	21	17	24	x	103.4	107.3	122.9	115.3	105.7	aOMgO	a								3.9	19.5	11.9	2.3		3.9	19.5	11.9	2.3
mg_atp_h2o-3_M1	aOPO	1	4	5	x	110	110.3	109.5	110.7	111.2	aOPO	a								0.3	-0.5	0.7	1.2		0.3	0.5	0.7	1.2
mg_atp_h2o-3_M1	aOPO	1	4	6	x	101.8	101.5	101.4	101.5	102	aOPO	a								-0.3	-0.4	-0.3	0.2		0.3	0.4	0.3	0.2
mg_atp_h2o-3_M1	aOPO	1	4	7	x	105.3	105.4	103	104.8	104.6	aOPO	a								0.1	-2.3	-0.5	-0.7		0.1	2.3	0.5	0.7
mg_atp_h2o-3_M1	aOPO	5	4	6	x	109.8	109.8	112.2	110.7	111.1	aOPO	a								0	2.4	0.9	1.3		0	2.4	0.9	1.3
mg_atp_h2o-3_M1	aOPO	5	4	7	x	122.8	122.9	123	122.4	121.6	aOPO	a								0.1	0.2	-0.4	-1.2		0.1	0.2	0.4	1.2
mg_atp_h2o-3_M1	aOPO	6	4	7	x	105	104.8	105.3	104.7	104.4	aOPO	a								-0.2	0.3	-0.3	-0.6		0.2	0.3	0.3	0.6
mg_atp_h2o-3_M1	aOPO	1	2	3	x	112	112	111.6	111.7	111.8	aOPO	a								0	-0.4	-0.3	-0.2		0	0.4	0.3	0.2
mg_atp_h2o-3_M1	aOPO	1	2	8	x	108.6	108.5	106.8	108.1	108.3	aOPO	a								-0.1	-1.8	-0.5	-0.3		0.1	1.8	0.5	0.3
mg_atp_h2o-3_M1	aOPO	1	2	9	x	100.2	99.7	101.4	102.6	101.8	aOPO	a								-0.5	1.2	2.4	1.6		0.5	1.2	2.4	1.6
mg_atp_h2o-3_M1	aOPO	3	2	8	x	115.5	116	113.7	114.1	114.2	aOPO	a								0.5	-1.8	-1.4	-1.3		0.5	1.8	1.4	1.3
mg_atp_h2o-3_M1	aOPO	3	2	9	x	112.2	112.6	114.3	113.3	113.5	aOPO	a								0.4	2.1	1.1	1.3		0.4	2.1	1.1	1.3
mg_atp_h2o-3_M1	aOPO	8	2	9	x	107.1	106.8	108.1	106.1	106.4	aOPO	a								-0.3	1	-1	-0.7		0.3	1	1	0.7
mg_atp_h2o-3_M1	aOPO	6	13	14	x	108.4	108.5	105.7	108	108.3	aOPO	a								0.1	-2.7	-0.4	-0.1		0.1	2.7	0.4	0.1
mg_atp_h2o-3_M1	aOPO	6	13	15	x	112.5	112.3	110.3	112.6	112.5	aOPO	a								-0.2	-2.2	0.1	0		0.2	2.2	0.1	0
mg_atp_h2o-3_M1	aOPO	6	13	16	x	100.5	100.3	102.7	101.9	101.3	aOPO	a								-0.2	2.2	1.4	0.8		0.2	2.2	1.4	0.8
mg_atp_h2o-3_M1	aOPO	14	13	15	x	115.6	115.8	120.1	114	114.3	aOPO	a								0.2	4.5	-1.6	-1.3		0.2	4.5	1.6	1.3
mg_atp_h2o-3_M1	aOPO	14	13	16	x	108.1	107.9	102.3	108.1	108.3	aOPO	a								-0.2	-5.8	0	0.2		0.2	5.8	0	0.2
mg_atp_h2o-3_M1	aOPO	15	13	16	x	110.6	110.8	113.9	111.5	111.3	aOPO	a								0.2	3.3	0.9	0.7		0.2	3.3	0.9	0.7
mg_atp_h2o-3_M1	aPOP	13	6	4	x	124.8	124.4	138	136.9	131.9	aPOP	a								-0.4	13.2	12.1	7.1		0.4	13.2	12.1	7.1
mg_atp_h2o-3_M1	aPOP	4	1	2	x	125.8	125.9	129.2	137.1	131.9	aPOP	a								0.1	3.4	11.3	6.1		0.1	3.4	11.3	6.1
mg_atp_h2o-3_M1	aPOC	2	9	10	x	118.8	118.1	113	120	120.7	aPOC	a								-0.7	-5.8	1.2	1.9		0.7	5.8	1.2	1.9
mg_atp_h2o-4	rMgO	17	11	x	x	2.01	2.021	2.092	2.055	2.045	rMgO	r								0.011	0.082	0.045	0.035		0.011	0.082	0.045	0.035
mg_atp_h2o-4	rMgO	17	15	x	x	2	2.019	2.096	2.076	2.067	rMgO	r								0.019	0.096	0.076	0.067		0.019	0.096	0.076	0.067
mg_atp_h2o-4	rMgO	17	18	x	x	2.125	2.126	2.086	2.131	2.104	rMgO	r								0.001	-0.039	0.006	-0.021		0.001	0.039	0.006	0.021
mg_atp_h2o-4	rMgO	17	21	x	x	2.166	2.16	2.093	2.142	2.11	rMgO	r								-0.006	-0.073	-0.024	-0.056		0.006	0.073	0.024	0.056
mg_atp_h2o-4	rMgO	17	24	x	x	2.148	2.154	2.137	2.322	2.18	rMgO	r								0.006	-0.011	0.174	0.032		0.006	0.011	0.174	0.032
mg_atp_h2o-4	rMgO	17	27	x	x	2.111	2.113	2.07	2.084	2.077	rMgO	r								0.002	-0.041	-0.027	-0.034		0.002	0.041	0.027	0.034
mg_atp_h2o-4	rOP	4	5	x	x	1.614	1.622	1.65	1.621	1.613	rOP	r								0.008	0.036	0.007	-0.001		0.008	0.036	0.007	0.001
mg_atp_h2o-4	rOP	6	5	x	x	1.468	1.478	1.458	1.474	1.461	rOP	r								0.01	-0.01	0.006	-0.007		0.01	0.01	0.006	0.007
mg_atp_h2o-4	rOP	7	5	x	x	1.611	1.63	1.689	1.62	1.624	rOP	r								0.019	0.078	0.009	0.013		0.019	0.078	0.009	0.013
mg_atp_h2o-4	rOP	8	5	x	x	1.58	1.591	1.578	1.586	1.584	rOP	r								0.011	-0.002	0.006	0.004		0.011	0.002	0.006	0.004
mg_atp_h2o-4	rOP	10	9	x	x	1.466	1.475	1.452	1.471	1.457	rOP	r								0.009	-0.014	0.005	-0.009		0.009	0.014	0.005	0.009
mg_atp_h2o-4	rOP	11	9	x	x	1.527	1.535	1.544	1.555	1.541	rOP	r								0.008	0.017	0.028	0.014		0.008	0.017	0.028	0.014
mg_atp_h2o-4	rOP	12	9	x	x	1.634	1.65	1.662	1.637	1.647	rOP	r								0.016	0.028	0.003	0.013		0.016	0.028	0.003	0.013
mg_atp_h2o-4	rOP	8	9	x	x	1.662	1.68	1.709	1.655	1.671	rOP	r								0.018	0.047	-0.007	0.009		0.018	0.047	0.007	0.009
mg_atp_h2o-4	rOP	12	13	x	x	1.632	1.648	1.67	1.629	1.636	rOP	r								0.016	0.038	-0.003	0.004		0.016	0.038	0.003	0.004
mg_atp_h2o-4	rOP	14	13	x	x	1.503	1.513	1.504	1.515	1.505	rOP	r								0.01	0.001	0.012	0.002		0.01	0.001	0.012	0.002
mg_atp_h2o-4	rOP	15	13	x	x	1.52	1.529	1.542	1.548	1.534	rOP	r								0.009	0.022	0.028	0.014		0.009	0.022	0.028	0.014
mg_atp_h2o-4	rOP	16	13	x	x	1.604	1.615	1.637	1.594	1.591	rOP	r								0.011	0.033	-0.01	-0.013		0.011	0.033	0.01	0.013
mg_atp_h2o-4	rCO	1	4	x	x	1.453	1.457	1.453	1.459	1.437	rCO	r								0.004	0	0.006	-0.016		0.004	0	0.006	0.016
mg_atp_h2o-4	aOMgO	11	17	15	x	93	93.2	90	97.4	96.5	aOMgO	a								0.2	-3	4.4	3.5		0.2	3	4.4	3.5
mg_atp_h2o-4	aOMgO	11	17	18	x	169.9	169.4	143.6	163.1	170.3	aOMgO	a								-0.5	-26.3	-6.8	0.4		0.5	26.3	6.8	0.4
mg_atp_h2o-4	aOMgO	11	17	21	x	76.2	76.2	69.4	80.5	81.2	aOMgO	a								0	-6.8	4.3	5		0	6.8	4.3	5
mg_atp_h2o-4	aOMgO	11	17	24	x	96.5	96.4	75.5	82.4	85.3	aOMgO	a								-0.1	-21	-14.1	-11.2		0.1	21	14.1	11.2
mg_atp_h2o-4	aOMgO	11	17	27	x	96	95.9	115.5	94	92.7	aOMgO	a								-0.1	19.5	-2	-3.3		0.1	19.5	2	3.3
mg_atp_h2o-4	aOMgO	15	17	18	x	96.7	96.9	101.2	81	82.3	aOMgO	a								0.2	4.5	-15.7	-14.4		0.2	4.5	15.7	14.4
mg_atp_h2o-4	aOMgO	15	17	21	x	168.1	168.1	146.2	173	177.5	aOMgO	a								0	-21.9	4.9	9.4		0	21.9	4.9	9.4
mg_atp_h2o-4	aOMgO	15	17	24	x	90.9	90.5	90.1	91.1	92.3	aOMgO	a								-0.4	-0.8	0.2	1.4		0.4	0.8	0.2	1.4
mg_atp_h2o-4	aOMgO	15	17	27	x	89.8	87.8	70.9	90.5	87.9	aOMgO	a								-2	-18.9	0.7	-1.9		2	18.9	0.7	1.9
mg_atp_h2o-4	aOMgO	18	17	21	x	94.3	94	111.3	98.9	99.8	aOMgO	a								-0.3	17	4.6	5.5		0.3	17	4.6	5.5
mg_atp_h2o-4	aOMgO	18	17	24	x	80.7	80.6	70.1	80.8	85.1	aOMgO	a								-0.1	-10.6	0.1	4.4		0.1	10.6	0.1	4.4
mg_atp_h2o-4	aOMgO	18	17	27	x	86.8	87.5	100.9	102.9	96.9	aOMgO	a								0.7	14.1	16.1	10.1		0.7	14.1	16.1	10.1
mg_atp_h2o-4	aOMgO	21	17	24	x	95.1	96	109.2	82	86.7	aOMgO	a								0.9	14.1	-13.1	-8.4		0.9	14.1	13.1	8.4
mg_atp_h2o-4	aOMgO	21	17	27	x	86.6	88	93.4	96.3	93	aOMgO	a								1.4	6.8	9.7	6.4		1.4	6.8	9.7	6.4
mg_atp_h2o-4	aOMgO	24	17	27	x	167.4	167.6	157.4	176.2	178	aOMgO	a								0.2	-10	8.8	10.6		0.2	10	8.8	10.6
mg_atp_h2o-4	aOPO	4	5	6	x	115.6	116.3	118.4	117.5	117.8	aOPO	a								0.7	2.8	1.9	2.2		0.7	2.8	1.9	2.2
mg_atp_h2o-4	aOPO	4	5	7	x	98.8	98.3	92.3	96	96.2	aOPO	a								-0.5	-6.5	-2.8	-2.6		0.5	6.5	2.8	2.6
mg_atp_h2o-4	aOPO	4	5	8	x	106.2	106.5	107.6	105.8	106.2	aOPO	a								0.3	1.4	-0.4	0		0.3	1.4	0.4	0
mg_atp_h2o-4	aOPO	6	5	7	x	114.8	114.3	112.9	115.4	114.8	aOPO	a								-0.5	-1.9	0.6	0		0.5	1.9	0.6	0
mg_atp_h2o-4	aOPO	6	5	8	x	114	114.1	118.2	114.8	114.5	aOPO	a								0.1	4.2	0.8	0.5		0.1	4.2	0.8	0.5
mg_atp_h2o-4	aOPO	7	5	8	x	105.8	105.8	103.6	104.9	105.2	aOPO	a								0	-2.2	-0.9	-0.6		0	2.2	0.9	0.6
mg_atp_h2o-4	aOPO	8	9	10	x	108.4	107.9	106.9	110.8	110.1	aOPO	a								-0.5	-1.5	2.4	1.7		0.5	1.5	2.4	1.7
mg_atp_h2o-4	aOPO	8	9	11	x	106.5	106.5	103.6	105.3	105.7	aOPO	a								0	-2.9	-1.2	-0.8		0	2.9	1.2	0.8
mg_atp_h2o-4	aOPO	8	9	12	x	98.5	98.3	97.9	99.2	98.8	aOPO	a								-0.2	-0.6	0.7	0.3		0.2	0.6	0.7	0.3
mg_atp_h2o-4	aOPO	10	9	11	x	121.1	121.6	125	119.7	119.9	aOPO	a								0.5	3.9	-1.4	-1.2		0.5	3.9	1.4	1.2
mg_atp_h2o-4	aOPO	10	9	12	x	112.8	113	115.1	113.4	113.4	aOPO	a								0.2	2.3	0.6	0.6		0.2	2.3	0.6	0.6
mg_atp_h2o-4	aOPO	11	9	12	x	106.9	106.9	104.6	106.3	106.5	aOPO	a								0	-2.3	-0.6	-0.4		0	2.3	0.6	0.4
mg_atp_h2o-4	aOPO	12	13	14	x	110.7	110.9	110.5	111.4	111.2	aOPO	a								0.2	-0.2	0.7	0.5		0.2	0.2	0.7	0.5
mg_atp_h2o-4	aOPO	12	13	15	x	107.7	107.8	106.8	106.3	106.9	aOPO	a								0.1	-0.9	-1.4	-0.8		0.1	0.9	1.4	0.8
mg_atp_h2o-4	aOPO	12	13	16	x	100.9	100.3	97.9	102.2	101.9	aOPO	a								-0.6	-3	1.3	1		0.6	3	1.3	1
mg_atp_h2o-4	aOPO	14	13	15	x	116.3	116.4	114.1	114.8	114.6	aOPO	a								0.1	-2.2	-1.5	-1.7		0.1	2.2	1.5	1.7
mg_atp_h2o-4	aOPO	14	13	16	x	112.3	112.3	116.6	113.4	113.2	aOPO	a								0	4.3	1.1	0.9		0	4.3	1.1	0.9
mg_atp_h2o-4	aOPO	15	13	16	x	107.8	107.8	109.4	107.8	108.1	aOPO	a								0	1.6	0	0.3		0	1.6	0	0.3
mg_atp_h2o-4	aPOP	5	8	9	x	137.6	137.1	145.7	152.4	148.4	aPOP	a								-0.5	8.1	14.8	10.8		0.5	8.1	14.8	10.8
mg_atp_h2o-4	aPOP	9	12	13	x	128.4	126.9	128.5	138.4	135.7	aPOP	a								-1.5	0.1	10	7.3		1.5	0.1	10	7.3
mg_atp_h2o-4	aPOC	5	4	1	x	118.6	118.9	114	120.8	121.6	aPOC	a								0.3	-4.6	2.2	3		0.3	4.6	2.2	3

## Sheet: zn_geom
Supporting Information for
Parameterization of DFTB3/3OB for Magnesium and Zinc for Chemical and Biological Applications
Xiya Lu, Michael Gaus, Marcus Elstner and Qiang Cui
																	N = number of comparisons
Geometric properties																	MAD = Mean absolute deviation
Calculated geometries (information based on xyz coordinates provided in the next sheet)																	MAX = Maximal absolute deviation
(bond lengths “r” in Angstrom, angles “a” in degree)																	MSE = Mean signed error
																	Statistics with B3LYP/aug-cc-pVTZ being the reference											Differences to B3LYP/aug-cc-pVTZ									Absolute differences to B3LYP/aug-cc-pVTZ
						B3LYP	MP2	B3LYP	PM6	DFTB3/MIO	DFTB3/3OB	B97-1	B97-2	B98					MP2	B3LYP	PM6	DFTB3/MIO	DFTB3/3OB	B97-1	B97-2	B98		MP2	B3LYP	PM6	DFTB3/MIO	DFTB3/3OB	B97-1	B97-2	B98		MP2	B3LYP	PM6	DFTB3/MIO	DFTB3/3OB	B97-1	B97-2	B98
molecule	property	atoms involved				aug-cc-pVTZ	aug-cc-pVTZ	6-31+G(d,p)				aug-cc-pVTZ	aug-cc-pVTZ	aug-cc-pVTZ	property	type			aug-cc-pVTZ	6-31+G(d,p)				aug-cc-pVTZ	aug-cc-pVTZ	aug-cc-pVTZ		aug-cc-pVTZ	6-31+G(d,p)				aug-cc-pVTZ	aug-cc-pVTZ	aug-cc-pVTZ		aug-cc-pVTZ	6-31+G(d,p)				aug-cc-pVTZ	aug-cc-pVTZ	aug-cc-pVTZ
zn_ac-2	rZnO	1	2	x	x	2.038	2.014	2.044	2.074	2.084	2.029	2.035	2.029	2.032	rZnO	r	N for bond lengths	163										-0.024	0.006	0.036	0.046	-0.009	-0.003	-0.009	-0.006		0.024	0.006	0.036	0.046	0.009	0.003	0.009	0.006
zn_ac-2	rZnO	1	5	x	x	2.032	2.007	2.037	2.073	2.081	2.025	2.029	2.023	2.026	rZnO	r	MAD for bond lengths		0.0172699	0.00369325	0.0653865	0.027	0.0121288	0.00233742	0.00493865	0.00219632		-0.025	0.005	0.041	0.049	-0.007	-0.003	-0.009	-0.006		0.025	0.005	0.041	0.049	0.007	0.003	0.009	0.006
zn_ac-2	rC=O	3	2	x	x	1.271	1.276	1.277	1.292	1.285	1.287	1.271	1.267	1.27	rC=O	r	MAX for bond lengths		0.077	0.011	0.553	0.139	0.091	0.011	0.023	0.012		0.005	0.006	0.021	0.014	0.016	0	-0.004	-0.001		0.005	0.006	0.021	0.014	0.016	0	0.004	0.001
zn_ac-2	rCC	3	4	x	x	1.499	1.495	1.503	1.48	1.487	1.496	1.503	1.496	1.503	rCC	r	MSE for bond lengths		-0.0147423	0.00321472	-0.0115337	-0.003	-0.000202454	0.000631902	-0.00452147	-0.000110429		-0.004	0.004	-0.019	-0.012	-0.003	0.004	-0.003	0.004		0.004	0.004	0.019	0.012	0.003	0.004	0.003	0.004
zn_ac-2	rCH	4	10	x	x	1.085	1.084	1.09	1.103	1.094	1.086	1.087	1.084	1.087	rCH	r												-0.001	0.005	0.018	0.009	0.001	0.002	-0.001	0.002		0.001	0.005	0.018	0.009	0.001	0.002	0.001	0.002
zn_ac-2	aCOZn	3	2	1	x	88	87.2	88.1	90.4	89.8	88.8	87.8	87.7	87.8	aCOZn	a	N for bond angles	180										-0.8	0.1	2.4	1.8	0.8	-0.2	-0.3	-0.2		0.8	0.1	2.4	1.8	0.8	0.2	0.3	0.2
zn_ac-2	aOZnO	2	1	5	x	65.1	66.3	65.2	63.6	63.5	65.5	65.3	65.3	65.3	aOZnO	a	MAD for bond angles		0.570556	0.229444	4.18333	3	2.24889	0.17	0.170556	0.132778		1.2	0.1	-1.5	-1.6	0.4	0.2	0.2	0.2		1.2	0.1	1.5	1.6	0.4	0.2	0.2	0.2
zn_ac-2	aOZnO	2	1	6	x	135.2	134.3	135.1	136.2	136.2	134.8	135	135	135	aOZnO	a	MAX for bond angles		4.3	4.2	64	16.2	14.6	1	1	0.8		-0.9	-0.1	1	1	-0.4	-0.2	-0.2	-0.2		0.9	0.1	1	1	0.4	0.2	0.2	0.2
zn_ac-2	aOCO	2	3	5	x	118.8	119	118.5	115.5	116.8	116.8	119	119	118.9	aOCO	a	MSE for bond angles		-0.158333	0.075	2.9	1.64	1.40222	-0.0855556	0.00611111	-0.0438889		0.2	-0.3	-3.3	-2	-2	0.2	0.2	0.1		0.2	0.3	3.3	2	2	0.2	0.2	0.1
zn_ac-2	aCCO	4	3	2	x	121	121	121.2	122.3	121.7	121.8	121	121	121	aCCO	a												0	0.2	1.3	0.7	0.8	0	0	0		0	0.2	1.3	0.7	0.8	0	0	0
zn_ac-2	aCCH	3	4	10	x	111	110.8	110.9	111.8	111	111.2	110.9	111.1	110.9	aCCH	a	MAD of different bond types											-0.2	-0.1	0.8	0	0.2	-0.1	0.1	-0.1		0.2	0.1	0.8	0	0.2	0.1	0.1	0.1
zn_ch3-1_P1	rZnC	1	2	x	x	2.001	1.954	2.002	2.023	2.001	1.992	1.993	1.981	1.992	rZnC	r	rZnC	7	0.0352857	0.00171429	0.125714	0.072	0.0255714	0.00328571	0.00714286	0.00328571		-0.047	0.001	0.022	0	-0.009	-0.008	-0.02	-0.009		0.047	0.001	0.022	0	0.009	0.008	0.02	0.009
zn_ch3-1_P1	rCH	2	3	x	x	1.085	1.086	1.09	1.107	1.096	1.089	1.089	1.085	1.088	rCH	r	rZnH	6	0.025	0.00133333	0.143	-	0.00966667	0.00316667	0.0015	0.00216667		0.001	0.005	0.022	0.011	0.004	0.004	0	0.003		0.001	0.005	0.022	0.011	0.004	0.004	0	0.003
zn_ch3-1_P1	aHCZn	3	2	1	x	103.9	104.6	103.9	111.9	109	108.4	104.2	104.6	104.3	aHCZn	a	rZnN	16	0.0333125	0.0024375	0.0789375	0.049	0.0180625	0.00275	0.0048125	0.0033125		0.7	0	8	5.1	4.5	0.3	0.7	0.4		0.7	0	8	5.1	4.5	0.3	0.7	0.4
zn_ch3-1_P1	aHCH	3	2	4	x	114.4	113.9	114.4	107	110	110.5	114.2	113.9	114.1	aHCH	a	rZnO	16	0.023125	0.00325	0.121125	0.04	0.0160625	0.0021875	0.005	0.0023125		-0.5	0	-7.4	-4.4	-3.9	-0.2	-0.5	-0.3		0.5	0	7.4	4.4	3.9	0.2	0.5	0.3
zn_ch3-2	rZnC	1	2	x	x	1.957	1.925	1.955	1.896	2.028	2.007	1.958	1.951	1.957	rZnC	r	rZnP	6	0.0515	0.00233333	0.332333	0.071	0.0228333	0.00283333	0.0121667	0.0025		-0.032	-0.002	-0.061	0.071	0.05	0.001	-0.006	0		0.032	0.002	0.061	0.071	0.05	0.001	0.006	0
zn_ch3-2	rCH	2	3	x	x	1.092	1.091	1.096	1.103	1.092	1.085	1.094	1.091	1.093	rCH	r	rZnS	15	0.0492667	0.00313333	0.0883333	0.066	0.0323333	0.00406667	0.0124667	0.0036		-0.001	0.004	0.011	0	-0.007	0.002	-0.001	0.001		0.001	0.004	0.011	0	0.007	0.002	0.001	0.001
zn_ch3-2	aHCZn	3	2	1	x	111.1	111.1	110.9	113.6	112	112.1	111.1	111.2	111.1	aHCZn	a												0	-0.2	2.5	0.9	1	0	0.1	0		0	0.2	2.5	0.9	1	0	0.1	0
zn_ch3-2	aCZnC	2	1	4	x	180	180	180	180	180	180	180	180	180	aCZnC	a	MAX of different bond types											0	0	0	0	0	0	0	0		0	0	0	0	0	0	0	0
zn_ch3-2	aHCH	3	2	5	x	107.9	107.8	108	105	106.9	106.7	107.8	107.7	107.8	aHCH	a	rZnC	7	0.047	0.004	0.269	0.123	0.055	0.008	0.02	0.009		-0.1	0.1	-2.9	-1	-1.2	-0.1	-0.2	-0.1		0.1	0.1	2.9	1	1.2	0.1	0.2	0.1
zn_co-1_P2	rZnC	1	2	x	x	2.038	2.012	2.042	1.934	2.114	2.037	2.042	2.043	2.041	rZnC	r	rZnH	6	0.027	0.002	0.16	-	0.044	0.005	0.003	0.003		-0.026	0.004	-0.104	0.076	-0.001	0.004	0.005	0.003		0.026	0.004	0.104	0.076	0.001	0.004	0.005	0.003
zn_co-1_P2	rC#O	2	3	x	x	1.106	1.126	1.117	1.121	1.093	1.096	1.108	1.106	1.107	rC#O	r	rZnN	16	0.053	0.006	0.184	0.139	0.091	0.008	0.018	0.011		0.02	0.011	0.015	-0.013	-0.01	0.002	0	0.001		0.02	0.011	0.015	0.013	0.01	0.002	0	0.001
zn_co-1_P2	aOCZn	3	2	1	x	180	180	180	180	180	180	180	180	180	aOCZn	a	rZnO	16	0.037	0.006	0.248	0.081	0.051	0.005	0.014	0.008		0	0	0	0	0	0	0	0		0	0	0	0	0	0	0	0
zn_co-2_P2	rZnC	2	1	x	x	2.032	2.002	2.032	1.867	2.103	2.037	2.036	2.04	2.037	rZnC	r	rZnP	6	0.07	0.004	0.553	0.11	0.043	0.008	0.023	0.006		-0.03	0	-0.165	0.071	0.005	0.004	0.008	0.005		0.03	0	0.165	0.071	0.005	0.004	0.008	0.005
zn_co-2_P2	rC#O	2	3	x	x	1.107	1.126	1.118	1.124	1.093	1.096	1.109	1.106	1.107	rC#O	r	rZnS	15	0.077	0.006	0.143	0.116	0.08	0.011	0.02	0.012		0.019	0.011	0.017	-0.014	-0.011	0.002	-0.001	0		0.019	0.011	0.017	0.014	0.011	0.002	0.001	0
zn_co-2_P2	aCZnC	2	1	4	x	180	180	180	180	180	180	180	180	180	aCZnC	a												0	0	0	0	0	0	0	0		0	0	0	0	0	0	0	0
zn_co-2_P2	aOCZn	3	2	1	x	180	180	180	180	180	180	180	180	180	aOCZn	a	MSE of different bond types											0	0	0	0	0	0	0	0		0	0	0	0	0	0	0	0
zn_co-3_P2	rZnC	1	2	x	x	2.092	2.054	2.093	1.897	2.184	2.11	2.094	2.095	2.095	rZnC	r	rZnC	7	-0.0352857	-3.17207e-17	-0.119429	0.072	0.0227143	0.001	-0.002	0.000714286		-0.038	0.001	-0.195	0.092	0.018	0.002	0.003	0.003		0.038	0.001	0.195	0.092	0.018	0.002	0.003	0.003
zn_co-3_P2	rC#O	2	3	x	x	1.109	1.127	1.12	1.125	1.093	1.096	1.111	1.108	1.109	rC#O	r	rZnH	6	-0.025	0.000666667	0.143	-	-0.008	0.00316667	0.0005	0.00216667		0.018	0.011	0.016	-0.016	-0.013	0.002	-0.001	0		0.018	0.011	0.016	0.016	0.013	0.002	0.001	0
zn_co-3_P2	aCZnC	2	1	4	x	120	120	120	120	120	120	120	120	120	aCZnC	a	rZnN	16	-0.0333125	0.0013125	-0.0020625	-0.049	-0.0156875	-0.001125	-0.0048125	-0.0031875		0	0	0	0	0	0	0	0		0	0	0	0	0	0	0	0
zn_co-3_P2	aOCZn	3	2	1	x	180	180	180	180	180	180	180	180	180	aOCZn	a	rZnO	16	-0.023125	0.001875	0.007	0.028	0.0005625	0.0008125	-0.00375	-0.0016875		0	0	0	0	0	0	0	0		0	0	0	0	0	0	0	0
zn_co-4_P2	rZnC	1	2	x	x	2.137	2.093	2.134	1.868	2.26	2.178	2.139	2.139	2.139	rZnC	r	rZnP	6	-0.0515	0.00233333	-0.332333	-0.014	0.0131667	-0.0015	-0.0121667	-0.0005		-0.044	-0.003	-0.269	0.123	0.041	0.002	0.002	0.002		0.044	0.003	0.269	0.123	0.041	0.002	0.002	0.002
zn_co-4_P2	rC#O	2	6	x	x	1.11	1.128	1.121	1.126	1.093	1.096	1.112	1.109	1.111	rC#O	r	rZnS	15	-0.0492667	0.0018	-0.0467333	-0.066	-0.0147333	-0.00353333	-0.0124667	-0.00306667		0.018	0.011	0.016	-0.017	-0.014	0.002	-0.001	0.001		0.018	0.011	0.016	0.017	0.014	0.002	0.001	0.001
zn_co-4_P2	aCZnC	2	1	4	x	109.5	109.5	109.5	109.5	109.5	109.5	109.5	109.5	109.5	aCZnC	a												0	0	0	0	0	0	0	0		0	0	0	0	0	0	0	0
zn_co-4_P2	aOCZn	6	2	1	x	180	180	180	180	179.9	180	180	180	180	aOCZn	a												0	0	0	-0.1	0	0	0	0		0	0	0	0.1	0	0	0	0
zn_h-1_P1	rZnH	1	2	x	x	1.533	1.507	1.531	1.693	-	1.489	1.534	1.53	1.533	rZnH	r												-0.026	-0.002	0.16	#VALUE!	-0.044	0.001	-0.003	0		0.026	0.002	0.16	#VALUE!	0.044	0.001	0.003	0
zn_h-2	rZnH	1	2	x	x	1.542	1.516	1.544	1.693	-	1.54	1.545	1.543	1.544	rZnH	r												-0.026	0.002	0.151	#VALUE!	-0.002	0.003	0.001	0.002		0.026	0.002	0.151	#VALUE!	0.002	0.003	0.001	0.002
zn_h-2	aHZnH	1	2	3	x	180	180	180	180	-	180	180	180	180	aHZnH	a												0	0	0	#VALUE!	0	0	0	0		0	0	0	#VALUE!	0	0	0	0
zn_h2o-1_P2	rZnO	1	2	x	x	1.868	1.855	1.871	2.03	1.91	1.856	1.87	1.87	1.868	rZnO	r												-0.013	0.003	0.162	0.042	-0.012	0.002	0.002	0		0.013	0.003	0.162	0.042	0.012	0.002	0.002	0
zn_h2o-1_P2	rHO	3	2	x	x	0.983	0.981	0.987	0.994	0.99	0.987	0.98	0.976	0.98	rHO	r												-0.002	0.004	0.011	0.007	0.004	-0.003	-0.007	-0.003		0.002	0.004	0.011	0.007	0.004	0.003	0.007	0.003
zn_h2o-1_P2	aHOZn	3	2	1	x	125.2	125.8	125.1	126.2	126.1	126	125.3	125.4	125.3	aHOZn	a												0.6	-0.1	1	0.9	0.8	0.1	0.2	0.1		0.6	0.1	1	0.9	0.8	0.1	0.2	0.1
zn_h2o-1_P2	aHOH	3	2	4	x	109.6	108.3	109.8	107.6	107.7	108	109.4	109.2	109.4	aHOH	a												-1.3	0.2	-2	-1.9	-1.6	-0.2	-0.4	-0.2		1.3	0.2	2	1.9	1.6	0.2	0.4	0.2
zn_h2o-2_P2	rZnO	1	2	x	x	1.865	1.851	1.865	1.983	1.884	1.84	1.867	1.869	1.866	rZnO	r												-0.014	0	0.118	0.019	-0.025	0.002	0.004	0.001		0.014	0	0.118	0.019	0.025	0.002	0.004	0.001
zn_h2o-2_P2	rHO	3	2	x	x	0.978	0.977	0.982	0.988	0.983	0.979	0.976	0.971	0.975	rHO	r												-0.001	0.004	0.01	0.005	0.001	-0.002	-0.007	-0.003		0.001	0.004	0.01	0.005	0.001	0.002	0.007	0.003
zn_h2o-2_P2	aHOZn	3	2	1	x	125.5	125.9	125.4	126.1	125.3	125.3	125.6	125.7	125.6	aHOZn	a												0.4	-0.1	0.6	-0.2	-0.2	0.1	0.2	0.1		0.4	0.1	0.6	0.2	0.2	0.1	0.2	0.1
zn_h2o-2_P2	aHOH	3	2	4	x	109	108.1	109.1	107.7	109.4	109.4	108.8	108.7	108.8	aHOH	a												-0.9	0.1	-1.3	0.4	0.4	-0.2	-0.3	-0.2		0.9	0.1	1.3	0.4	0.4	0.2	0.3	0.2
zn_h2o-2_P2	aOZnO	2	1	5	x	179.9	179.9	179.9	179.9	180	180	179.9	179.9	179.9	aOZnO	a												0	0	0	0.1	0.1	0	0	0		0	0	0	0.1	0.1	0	0	0
zn_h2o-3_P2	rZnO	1	2	x	x	1.938	1.917	1.943	1.995	1.968	1.924	1.943	1.937	1.94	rZnO	r												-0.021	0.005	0.057	0.03	-0.014	0.005	-0.001	0.002		0.021	0.005	0.057	0.03	0.014	0.005	0.001	0.002
zn_h2o-3_P2	rHO	3	2	x	x	0.973	0.972	0.976	0.98	0.978	0.973	0.971	0.967	0.97	rHO	r												-0.001	0.003	0.007	0.005	0	-0.002	-0.006	-0.003		0.001	0.003	0.007	0.005	0	0.002	0.006	0.003
zn_h2o-3_P2	aHOZn	3	2	1	x	126	126.4	126	126	125.4	125.6	126.1	126.1	126.1	aHOZn	a												0.4	0	0	-0.6	-0.4	0.1	0.1	0.1		0.4	0	0	0.6	0.4	0.1	0.1	0.1
zn_h2o-3_P2	aHOH	3	2	4	x	107.9	107.2	108.1	107.9	109.2	108.8	107.7	107.7	107.8	aHOH	a												-0.7	0.2	0	1.3	0.9	-0.2	-0.2	-0.1		0.7	0.2	0	1.3	0.9	0.2	0.2	0.1
zn_h2o-3_P2	aOZnO	2	1	7	x	119.7	119.7	120	119.8	120	120	119.7	119.7	119.7	aOZnO	a												0	0.3	0.1	0.3	0.3	0	0	0		0	0.3	0.1	0.3	0.3	0	0	0
zn_h2o-4_P2	rZnO	1	2	x	x	1.994	1.97	2	2.02	2.042	2.001	1.997	1.994	1.995	rZnO	r												-0.024	0.006	0.026	0.048	0.007	0.003	0	0.001		0.024	0.006	0.026	0.048	0.007	0.003	0	0.001
zn_h2o-4_P2	rHO	6	2	x	x	0.969	0.969	0.973	0.971	0.975	0.97	0.968	0.964	0.967	rHO	r												0	0.004	0.002	0.006	0.001	-0.001	-0.005	-0.002		0	0.004	0.002	0.006	0.001	0.001	0.005	0.002
zn_h2o-4_P2	aHOZn	6	2	1	x	126.6	127	126.5	125.7	125.1	125.3	126.7	126.7	126.7	aHOZn	a												0.4	-0.1	-0.9	-1.5	-1.3	0.1	0.1	0.1		0.4	0.1	0.9	1.5	1.3	0.1	0.1	0.1
zn_h2o-4_P2	aHOH	6	2	7	x	107.5	106.8	107.7	108.6	110	109.6	107.3	107.2	107.3	aHOH	a												-0.7	0.2	1.1	2.5	2.1	-0.2	-0.3	-0.2		0.7	0.2	1.1	2.5	2.1	0.2	0.3	0.2
zn_h2o-4_P2	aOZnO	2	1	3	x	107.2	107.3	107.2	109.5	109.1	109	107.2	107.3	107.2	aOZnO	a												0.1	0	2.3	1.9	1.8	0	0.1	0		0.1	0	2.3	1.9	1.8	0	0.1	0
zn_h2o-5_P2	rZnO	2	1	x	x	2.122	2.091	2.125	2.05	2.203	2.173	2.124	2.123	2.122	rZnO	r												-0.031	0.003	-0.072	0.081	0.051	0.002	0.001	0		0.031	0.003	0.072	0.081	0.051	0.002	0.001	0
zn_h2o-5_P2	rZnO	2	3	x	x	2.031	2.005	2.037	2.125	2.093	2.046	2.032	2.032	2.03	rZnO	r												-0.026	0.006	0.094	0.062	0.015	0.001	0.001	-0.001		0.026	0.006	0.094	0.062	0.015	0.001	0.001	0.001
zn_h2o-5_P2	rHO	8	1	x	x	0.967	0.968	0.971	0.969	0.974	0.968	0.966	0.962	0.966	rHO	r												0.001	0.004	0.002	0.007	0.001	-0.001	-0.005	-0.001		0.001	0.004	0.002	0.007	0.001	0.001	0.005	0.001
zn_h2o-5_P2	aHOZn	8	1	2	x	124.9	125.1	124.6	124.9	124.7	124.7	125	125	125	aHOZn	a												0.2	-0.3	0	-0.2	-0.2	0.1	0.1	0.1		0.2	0.3	0	0.2	0.2	0.1	0.1	0.1
zn_h2o-5_P2	aHOH	8	1	7	x	106.8	105.9	107.1	108.7	109.5	109.2	106.6	106.5	106.7	aHOH	a												-0.9	0.3	1.9	2.7	2.4	-0.2	-0.3	-0.1		0.9	0.3	1.9	2.7	2.4	0.2	0.3	0.1
zn_h2o-5_P2	aOZnO	3	2	4	x	140.8	141	145	147.5	125.6	126.2	140.8	140.8	140.8	aOZnO	a												0.2	4.2	6.7	-15.2	-14.6	0	0	0		0.2	4.2	6.7	15.2	14.6	0	0	0
zn_h2o-5_P2	aOZnO	3	2	1	x	88.1	88.2	87.9	98.7	88.3	88.5	88.1	88.1	88.1	aOZnO	a												0.1	-0.2	10.6	0.2	0.4	0	0	0		0.1	0.2	10.6	0.2	0.4	0	0	0
zn_h2o-6_P2	rZnO	19	1	x	x	2.122	2.09	2.124	2.129	2.196	2.157	2.124	2.124	2.123	rZnO	r												-0.032	0.002	0.007	0.074	0.035	0.002	0.002	0.001		0.032	0.002	0.007	0.074	0.035	0.002	0.002	0.001
zn_h2o-6_P2	rHO	7	1	x	x	0.966	0.966	0.97	0.96	0.972	0.966	0.965	0.961	0.964	rHO	r												0	0.004	-0.006	0.006	0	-0.001	-0.005	-0.002		0	0.004	0.006	0.006	0	0.001	0.005	0.002
zn_h2o-6_P2	aHOZn	7	1	19	x	126.4	126.7	126.2	125.3	124.9	125	126.4	126.5	126.4	aHOZn	a												0.3	-0.2	-1.1	-1.5	-1.4	0	0.1	0		0.3	0.2	1.1	1.5	1.4	0	0.1	0
zn_h2o-6_P2	aHOH	7	1	8	x	107.2	106.5	107.6	109.4	110.2	110.1	107.1	107	107.1	aHOH	a												-0.7	0.4	2.2	3	2.9	-0.1	-0.2	-0.1		0.7	0.4	2.2	3	2.9	0.1	0.2	0.1
zn_h2o-6_P2	aOZnO	1	19	4	x	90	90	90	90	90	90	90	90	90	aOZnO	a												0	0	0	0	0	0	0	0		0	0	0	0	0	0	0	0
zn_h-ch3	rZnH	1	2	x	x	1.543	1.516	1.544	1.672	-	1.537	1.546	1.543	1.545	rZnH	r												-0.027	0.001	0.129	#VALUE!	-0.006	0.003	0	0.002		0.027	0.001	0.129	#VALUE!	0.006	0.003	0	0.002
zn_h-ch3	rZnC	1	3	x	x	1.954	1.924	1.953	1.89	-	2.009	1.956	1.948	1.955	rZnC	r												-0.03	-0.001	-0.064	#VALUE!	0.055	0.002	-0.006	0.001		0.03	0.001	0.064	#VALUE!	0.055	0.002	0.006	0.001
zn_h-ch3	rCH	3	4	x	x	1.091	1.091	1.096	1.103	-	1.086	1.094	1.091	1.093	rCH	r												0	0.005	0.012	#VALUE!	-0.005	0.003	0	0.002		0	0.005	0.012	#VALUE!	0.005	0.003	0	0.002
zn_h-ch3	aCZnH	3	1	2	x	180	180	180	180	-	180	180	180	180	aCZnH	a												0	0	0	#VALUE!	0	0	0	0		0	0	0	#VALUE!	0	0	0	0
zn_h-ch3	aHCZn	4	3	1	x	110.9	111.1	110.8	113.9	-	112.2	111	111.1	111	aHCZn	a												0.2	-0.1	3	#VALUE!	1.3	0.1	0.2	0.1		0.2	0.1	3	#VALUE!	1.3	0.1	0.2	0.1
zn_h-ch3	aHCH	4	3	5	x	108	107.8	108.1	104.7	-	106.6	107.9	107.7	107.9	aHCH	a												-0.2	0.1	-3.3	#VALUE!	-1.4	-0.1	-0.3	-0.1		0.2	0.1	3.3	#VALUE!	1.4	0.1	0.3	0.1
zn_h-nh2	rZnH	2	1	x	x	1.52	1.497	1.521	1.656	-	1.521	1.524	1.522	1.523	rZnH	r												-0.023	0.001	0.136	#VALUE!	0.001	0.004	0.002	0.003		0.023	0.001	0.136	#VALUE!	0.001	0.004	0.002	0.003
zn_h-nh2	rZnN	1	3	x	x	1.827	1.804	1.828	1.66	-	1.825	1.83	1.824	1.827	rZnN	r												-0.023	0.001	-0.167	#VALUE!	-0.002	0.003	-0.003	0		0.023	0.001	0.167	#VALUE!	0.002	0.003	0.003	0
zn_h-nh2	rHN	4	3	x	x	1.009	1.01	1.014	1.017	-	1.011	1.011	1.007	1.011	rHN	r												0.001	0.005	0.008	#VALUE!	0.002	0.002	-0.002	0.002		0.001	0.005	0.008	#VALUE!	0.002	0.002	0.002	0.002
zn_h-nh2	aHZnN	2	1	3	x	176.3	176.7	176.2	180	-	178.1	176.1	176.3	176.3	aHZnN	a												0.4	-0.1	3.7	#VALUE!	1.8	-0.2	0	0		0.4	0.1	3.7	#VALUE!	1.8	0.2	0	0
zn_h-nh2	aHNZn	4	3	1	x	120.7	121.1	120.7	126.6	-	122.2	119.8	120.1	120.2	aHNZn	a												0.4	0	5.9	#VALUE!	1.5	-0.9	-0.6	-0.5		0.4	0	5.9	#VALUE!	1.5	0.9	0.6	0.5
zn_h-nh2	aHNH	4	3	5	x	108.7	108.6	109.2	106.7	-	111.3	108.1	108.2	108.3	aHNH	a												-0.1	0.5	-2	#VALUE!	2.6	-0.6	-0.5	-0.4		0.1	0.5	2	#VALUE!	2.6	0.6	0.5	0.4
zn_h-oh	rZnH	1	4	x	x	1.512	1.489	1.512	1.65	-	1.516	1.517	1.514	1.515	rZnH	r												-0.023	0	0.138	#VALUE!	0.004	0.005	0.002	0.003		0.023	0	0.138	#VALUE!	0.004	0.005	0.002	0.003
zn_h-oh	rZnO	1	2	x	x	1.784	1.766	1.783	1.536	-	1.787	1.786	1.78	1.784	rZnO	r												-0.018	-0.001	-0.248	#VALUE!	0.003	0.002	-0.004	0		0.018	0.001	0.248	#VALUE!	0.003	0.002	0.004	0
zn_h-oh	rHO	2	3	x	x	0.959	0.961	0.964	0.894	-	0.963	0.959	0.955	0.958	rHO	r												0.002	0.005	-0.065	#VALUE!	0.004	0	-0.004	-0.001		0.002	0.005	0.065	#VALUE!	0.004	0	0.004	0.001
zn_h-oh	aHZnO	4	1	2	x	175.7	175.9	175.5	180	-	176.7	175.8	175.9	175.8	aHZnO	a												0.2	-0.2	4.3	#VALUE!	1	0.1	0.2	0.1		0.2	0.2	4.3	#VALUE!	1	0.1	0.2	0.1
zn_h-oh	aHOZn	3	2	1	x	118.2	117.9	118.6	179.9	-	121.4	117.6	117.8	117.9	aHOZn	a												-0.3	0.4	61.7	#VALUE!	3.2	-0.6	-0.4	-0.3		0.3	0.4	61.7	#VALUE!	3.2	0.6	0.4	0.3
zn_h-sh	rZnH	1	4	x	x	1.53	1.505	1.532	1.674	-	1.529	1.533	1.531	1.533	rZnH	r												-0.025	0.002	0.144	#VALUE!	-0.001	0.003	0.001	0.003		0.025	0.002	0.144	#VALUE!	0.001	0.003	0.001	0.003
zn_h-sh	rZnS	1	2	x	x	2.187	2.151	2.193	2.085	-	2.192	2.188	2.178	2.188	rZnS	r												-0.036	0.006	-0.102	#VALUE!	0.005	0.001	-0.009	0.001		0.036	0.006	0.102	#VALUE!	0.005	0.001	0.009	0.001
zn_h-sh	rHS	2	3	x	x	1.348	1.341	1.351	1.356	-	1.343	1.349	1.343	1.349	rHS	r												-0.007	0.003	0.008	#VALUE!	-0.005	0.001	-0.005	0.001		0.007	0.003	0.008	#VALUE!	0.005	0.001	0.005	0.001
zn_h-sh	aHZnS	4	1	2	x	178.6	178.8	178.9	175.7	-	178.2	178.7	178.8	178.6	aHZnS	a												0.2	0.3	-2.9	#VALUE!	-0.4	0.1	0.2	0		0.2	0.3	2.9	#VALUE!	0.4	0.1	0.2	0
zn_h-sh	aHSZn	3	2	1	x	93.7	93	93	104.9	-	103.3	93.6	93.5	93.6	aHSZn	a												-0.7	-0.7	11.2	#VALUE!	9.6	-0.1	-0.2	-0.1		0.7	0.7	11.2	#VALUE!	9.6	0.1	0.2	0.1
zn_nh2-1_P1	rZnN	1	2	x	x	1.856	1.826	1.86	2.04	1.747	1.784	1.854	1.844	1.852	rZnN	r												-0.03	0.004	0.184	-0.109	-0.072	-0.002	-0.012	-0.004		0.03	0.004	0.184	0.109	0.072	0.002	0.012	0.004
zn_nh2-1_P1	rHN	1	3	x	x	1.023	1.024	1.028	1.03	1.015	1.024	1.024	1.019	1.024	rHN	r												0.001	0.005	0.007	-0.008	0.001	0.001	-0.004	0.001		0.001	0.005	0.007	0.008	0.001	0.001	0.004	0.001
zn_nh2-1_P1	aHNZn	3	1	2	x	108	108	108.3	109.9	124	116.8	108	108.4	108.1	aHNZn	a												0	0.3	1.9	16	8.8	0	0.4	0.1		0	0.3	1.9	16	8.8	0	0.4	0.1
zn_nh2-1_P1	aHNH	3	1	4	x	106.3	106.5	106.6	105.4	112	108.9	105.9	106	106	aHNH	a												0.2	0.3	-0.9	5.7	2.6	-0.4	-0.3	-0.3		0.2	0.3	0.9	5.7	2.6	0.4	0.3	0.3
zn_nh2-2	rZnN	1	2	x	x	1.822	1.799	1.822	1.711	1.781	1.809	1.825	1.818	1.822	rZnN	r												-0.023	0	-0.111	-0.041	-0.013	0.003	-0.004	0		0.023	0	0.111	0.041	0.013	0.003	0.004	0
zn_nh2-2	rHN	2	4	x	x	1.01	1.01	1.014	1.014	1.006	1.011	1.012	1.007	1.011	rHN	r												0	0.004	0.004	-0.004	0.001	0.002	-0.003	0.001		0	0.004	0.004	0.004	0.001	0.002	0.003	0.001
zn_nh2-2	aHNZn	4	2	1	x	118.4	118.9	118.6	118.6	123.9	122.4	117.7	118.2	118.2	aHNZn	a												0.5	0.2	0.2	5.5	4	-0.7	-0.2	-0.2		0.5	0.2	0.2	5.5	4	0.7	0.2	0.2
zn_nh2-2	aNZnN	2	1	3	x	173.7	174.4	173.6	167	180	177	173.6	173.8	173.8	aNZnN	a												0.7	-0.1	-6.7	6.3	3.3	-0.1	0.1	0.1		0.7	0.1	6.7	6.3	3.3	0.1	0.1	0.1
zn_nh2-2	aHNH	4	2	5	x	108.4	108.3	108.8	109.4	112.2	111.4	107.8	107.9	108	aHNH	a												-0.1	0.4	1	3.8	3	-0.6	-0.5	-0.4		0.1	0.4	1	3.8	3	0.6	0.5	0.4
zn_nh3-1_P2	rZnN	1	2	x	x	1.96	1.93	1.963	2.108	1.933	1.955	1.961	1.956	1.958	rZnN	r												-0.03	0.003	0.148	-0.027	-0.005	0.001	-0.004	-0.002		0.03	0.003	0.148	0.027	0.005	0.001	0.004	0.002
zn_nh3-1_P2	rHN	2	3	x	x	1.03	1.029	1.034	1.046	1.03	1.037	1.03	1.026	1.03	rHN	r												-0.001	0.004	0.016	0	0.007	0	-0.004	0		0.001	0.004	0.016	0	0.007	0	0.004	0
zn_nh3-1_P2	aHNZn	3	2	1	x	111.5	112.3	111.5	112.8	113.6	113.5	111.6	111.8	111.7	aHNZn	a												0.8	0	1.3	2.1	2	0.1	0.3	0.2		0.8	0	1.3	2.1	2	0.1	0.3	0.2
zn_nh3-1_P2	aHNH	3	2	4	x	107.4	106.6	107.4	105.9	105	105.2	107.2	107.1	107.1	aHNH	a												-0.8	0	-1.5	-2.4	-2.2	-0.2	-0.3	-0.3		0.8	0	1.5	2.4	2.2	0.2	0.3	0.3
zn_nh3-2_P2	rZnN	1	2	x	x	1.946	1.918	1.95	2.029	1.912	1.936	1.948	1.945	1.947	rZnN	r												-0.028	0.004	0.083	-0.034	-0.01	0.002	-0.001	0.001		0.028	0.004	0.083	0.034	0.01	0.002	0.001	0.001
zn_nh3-2_P2	rHN	2	3	x	x	1.026	1.026	1.03	1.043	1.025	1.031	1.026	1.022	1.026	rHN	r												0	0.004	0.017	-0.001	0.005	0	-0.004	0		0	0.004	0.017	0.001	0.005	0	0.004	0
zn_nh3-2_P2	aHNZn	3	2	1	x	112.6	113	112.7	113.5	113.2	113.3	112.7	112.8	112.7	aHNZn	a												0.4	0.1	0.9	0.6	0.7	0.1	0.2	0.1		0.4	0.1	0.9	0.6	0.7	0.1	0.2	0.1
zn_nh3-2_P2	aNZnN	2	1	9	x	180	180	180	180	180	180	180	180	180	aNZnN	a												0	0	0	0	0	0	0	0		0	0	0	0	0	0	0	0
zn_nh3-2_P2	aHNH	3	2	4	x	106.1	105.8	106	105.1	105.6	105.4	106	106	106	aHNH	a												-0.3	-0.1	-1	-0.5	-0.7	-0.1	-0.1	-0.1		0.3	0.1	1	0.5	0.7	0.1	0.1	0.1
zn_nh3-3_P2	rZnN	1	2	x	x	2.029	1.995	2.03	2.045	1.997	2.037	2.029	2.024	2.027	rZnN	r												-0.034	0.001	0.016	-0.032	0.008	0	-0.005	-0.002		0.034	0.001	0.016	0.032	0.008	0	0.005	0.002
zn_nh3-3_P2	rHN	3	2	x	x	1.021	1.021	1.025	1.037	1.019	1.025	1.022	1.018	1.022	rHN	r												0	0.004	0.016	-0.002	0.004	0.001	-0.003	0.001		0	0.004	0.016	0.002	0.004	0.001	0.003	0.001
zn_nh3-3_P2	aHNZn	3	2	1	x	113.6	113.9	113.6	113.8	113.2	113.4	113.7	113.7	113.6	aHNZn	a												0.3	0	0.2	-0.4	-0.2	0.1	0.1	0		0.3	0	0.2	0.4	0.2	0.1	0.1	0
zn_nh3-3_P2	aNZnN	2	1	9	x	120	120	120	120	120	120	120	120	120	aNZnN	a												0	0	0	0	0	0	0	0		0	0	0	0	0	0	0	0
zn_nh3-3_P2	aHNH	3	2	4	x	105.6	105.2	105.5	105	106	105.7	105.4	105.4	105.4	aHNH	a												-0.4	-0.1	-0.6	0.4	0.1	-0.2	-0.2	-0.2		0.4	0.1	0.6	0.4	0.1	0.2	0.2	0.2
zn_nh3-4_P2	rZnN	1	2	x	x	2.09	2.052	2.091	2.058	2.047	2.091	2.088	2.087	2.084	rZnN	r												-0.038	0.001	-0.032	-0.043	0.001	-0.002	-0.003	-0.006		0.038	0.001	0.032	0.043	0.001	0.002	0.003	0.006
zn_nh3-4_P2	rHN	6	2	x	x	1.02	1.019	1.023	1.032	1.017	1.022	1.02	1.016	1.02	rHN	r												-0.001	0.003	0.012	-0.003	0.002	0	-0.004	0		0.001	0.003	0.012	0.003	0.002	0	0.004	0
zn_nh3-4_P2	aHNZn	6	2	1	x	113.4	113.7	113.3	113.2	112.4	112.7	113.4	113.5	113.5	aHNZn	a												0.3	-0.1	-0.2	-1	-0.7	0	0.1	0.1		0.3	0.1	0.2	1	0.7	0	0.1	0.1
zn_nh3-4_P2	aNZnN	2	1	3	x	109.5	109.5	109.5	109.5	109.5	109.5	109.5	109.5	109.5	aNZnN	a												0	0	0	0	0	0	0	0		0	0	0	0	0	0	0	0
zn_nh3-4_P2	aHNH	6	2	7	x	105.3	105	105.4	105.5	106.4	106.1	105.2	105.2	105.2	aHNH	a												-0.3	0.1	0.2	1.1	0.8	-0.1	-0.1	-0.1		0.3	0.1	0.2	1.1	0.8	0.1	0.1	0.1
zn_nh3-5_P2	rZnN	1	12	x	x	2.137	2.094	2.135	2.139	2.084	2.135	2.133	2.133	2.132	rZnN	r												-0.043	-0.002	0.002	-0.053	-0.002	-0.004	-0.004	-0.005		0.043	0.002	0.002	0.053	0.002	0.004	0.004	0.005
zn_nh3-5_P2	rZnN	1	13	x	x	2.297	2.248	2.294	2.239	2.29	2.282	2.291	2.294	2.29	rZnN	r												-0.049	-0.003	-0.058	-0.007	-0.015	-0.006	-0.003	-0.007		0.049	0.003	0.058	0.007	0.015	0.006	0.003	0.007
zn_nh3-5_P2	rHN	4	12	x	x	1.019	1.019	1.023	1.028	1.016	1.021	1.02	1.015	1.02	rHN	r												0	0.004	0.009	-0.003	0.002	0.001	-0.004	0.001		0	0.004	0.009	0.003	0.002	0.001	0.004	0.001
zn_nh3-5_P2	aHNZn	4	12	1	x	112.8	113.1	112.8	113.2	111.7	112	112.9	112.9	112.9	aHNZn	a												0.3	0	0.4	-1.1	-0.8	0.1	0.1	0.1		0.3	0	0.4	1.1	0.8	0.1	0.1	0.1
zn_nh3-5_P2	aNZnN	12	1	14	x	119.9	119.9	120	119.9	120	120	119.9	119.9	119.9	aNZnN	a												0	0.1	0	0.1	0.1	0	0	0		0	0.1	0	0.1	0.1	0	0	0
zn_nh3-5_P2	aNZnN	12	1	13	x	90	90	90	90	90	90	90	90	90	aNZnN	a												0	0	0	0	0	0	0	0		0	0	0	0	0	0	0	0
zn_nh3-5_P2	aHNH	4	12	5	x	105.3	104.8	105.3	105.4	107	106.5	105.1	105.1	105.1	aHNH	a												-0.5	0	0.1	1.7	1.2	-0.2	-0.2	-0.2		0.5	0	0.1	1.7	1.2	0.2	0.2	0.2
zn_nh3-6_P2	rZnN	13	14	x	x	2.279	2.226	2.275	2.26	2.246	2.262	2.275	2.276	2.274	rZnN	r												-0.053	-0.004	-0.019	-0.033	-0.017	-0.004	-0.003	-0.005		0.053	0.004	0.019	0.033	0.017	0.004	0.003	0.005
zn_nh3-6_P2	rHN	7	14	x	x	1.018	1.018	1.021	1.022	1.014	1.018	1.019	1.014	1.018	rHN	r												0	0.003	0.004	-0.004	0	0.001	-0.004	0		0	0.003	0.004	0.004	0	0.001	0.004	0
zn_nh3-6_P2	aHNZn	7	14	13	x	113.6	114	113.9	113.4	111.1	112	113.8	113.7	113.8	aHNZn	a												0.4	0.3	-0.2	-2.5	-1.6	0.2	0.1	0.2		0.4	0.3	0.2	2.5	1.6	0.2	0.1	0.2
zn_nh3-6_P2	aNZnN	14	13	15	x	90.4	90.5	90.3	90.2	90.2	90.3	90.4	90.4	90.4	aNZnN	a												0.1	-0.1	-0.2	-0.2	-0.1	0	0	0		0.1	0.1	0.2	0.2	0.1	0	0	0
zn_nh3-6_P2	aHNH	7	14	8	x	105	104.4	104.9	105.4	107.7	106.8	104.8	104.8	104.8	aHNH	a												-0.6	-0.1	0.4	2.7	1.8	-0.2	-0.2	-0.2		0.6	0.1	0.4	2.7	1.8	0.2	0.2	0.2
zn_nch2-1_P1	rZnN	1	2	x	x	1.925	1.894	1.931	2.011	1.786	1.834	1.917	1.907	1.914	rZnN	r												-0.031	0.006	0.086	-0.139	-0.091	-0.008	-0.018	-0.011		0.031	0.006	0.086	0.139	0.091	0.008	0.018	0.011
zn_nch2-1_P1	rC=N	2	3	x	x	1.251	1.276	1.26	1.259	1.256	1.265	1.255	1.251	1.254	rC=N	r												0.025	0.009	0.008	0.005	0.014	0.004	0	0.003		0.025	0.009	0.008	0.005	0.014	0.004	0	0.003
zn_nch2-1_P1	rCH	3	4	x	x	1.091	1.086	1.095	1.099	1.115	1.105	1.093	1.09	1.093	rCH	r												-0.005	0.004	0.008	0.024	0.014	0.002	-0.001	0.002		0.005	0.004	0.008	0.024	0.014	0.002	0.001	0.002
zn_nch2-1_P1	rCH	3	5	x	x	1.1	1.093	1.103	1.139	1.115	1.105	1.102	1.098	1.101	rCH	r												-0.007	0.003	0.039	0.015	0.005	0.002	-0.002	0.001		0.007	0.003	0.039	0.015	0.005	0.002	0.002	0.001
zn_nch2-1_P1	aCNZn	3	2	1	x	123.9	121.3	123.4	129.7	130.9	124.4	123.5	123.6	123.6	aCNZn	a												-2.6	-0.5	5.8	7	0.5	-0.4	-0.3	-0.3		2.6	0.5	5.8	7	0.5	0.4	0.3	0.3
zn_nch2-1_P1	aHCN	2	3	4	x	129	128.4	129.1	137.7	126.1	127.2	129	129	128.9	aHCN	a												-0.6	0.1	8.7	-2.9	-1.8	0	0	-0.1		0.6	0.1	8.7	2.9	1.8	0	0	0.1
zn_nch2-1_P1	aHCN	2	3	5	x	115	113.8	114.7	112.4	118.7	117.4	115	115.1	115.1	aHCN	a												-1.2	-0.3	-2.6	3.7	2.4	0	0.1	0.1		1.2	0.3	2.6	3.7	2.4	0	0.1	0.1
zn_nch2-2	rZnN	1	2	x	x	1.839	1.816	1.843	1.706	1.774	1.824	1.841	1.836	1.839	rZnN	r												-0.023	0.004	-0.133	-0.065	-0.015	0.002	-0.003	0		0.023	0.004	0.133	0.065	0.015	0.002	0.003	0
zn_nch2-2	rC=N	2	3	x	x	1.257	1.271	1.267	1.27	1.252	1.267	1.26	1.256	1.259	rC=N	r												0.014	0.01	0.013	-0.005	0.01	0.003	-0.001	0.002		0.014	0.01	0.013	0.005	0.01	0.003	0.001	0.002
zn_nch2-2	rCH	3	4	x	x	1.099	1.096	1.102	1.105	1.125	1.112	1.101	1.099	1.101	rCH	r												-0.003	0.003	0.006	0.026	0.013	0.002	0	0.002		0.003	0.003	0.006	0.026	0.013	0.002	0	0.002
zn_nch2-2	rCH	3	5	x	x	1.1	1.097	1.104	1.096	1.131	1.12	1.102	1.1	1.102	rCH	r												-0.003	0.004	-0.004	0.031	0.02	0.002	0	0.002		0.003	0.004	0.004	0.031	0.02	0.002	0	0.002
zn_nch2-2	aCNZn	3	2	1	x	131.1	129.5	130.1	135.7	144	129.3	130.2	130.4	130.5	aCNZn	a												-1.6	-1	4.6	12.9	-1.8	-0.9	-0.7	-0.6		1.6	1	4.6	12.9	1.8	0.9	0.7	0.6
zn_nch2-2	aNZnN	2	1	6	x	166.2	168.7	165.6	166.9	163.4	167	166.9	167.2	167	aNZnN	a												2.5	-0.6	0.7	-2.8	0.8	0.7	1	0.8		2.5	0.6	0.7	2.8	0.8	0.7	1	0.8
zn_nch2-2	aHCN	2	3	4	x	120	119.6	119.7	117.7	122.2	121.2	119.8	120	119.9	aHCN	a												-0.4	-0.3	-2.3	2.2	1.2	-0.2	0	-0.1		0.4	0.3	2.3	2.2	1.2	0.2	0	0.1
zn_nch2-2	aHCN	2	3	5	x	126	125.8	126.1	129.9	124.8	125.8	126	126.1	126	aHCN	a												-0.2	0.1	3.9	-1.2	-0.2	0	0.1	0		0.2	0.1	3.9	1.2	0.2	0	0.1	0
zn_nhch2-1_P2	rZnN	1	2	x	x	1.929	1.897	1.933	2.021	1.889	1.918	1.927	1.923	1.925	rZnN	r												-0.032	0.004	0.092	-0.04	-0.011	-0.002	-0.006	-0.004		0.032	0.004	0.092	0.04	0.011	0.002	0.006	0.004
zn_nhch2-1_P2	rC=N	2	4	x	x	1.282	1.293	1.289	1.304	1.29	1.293	1.285	1.28	1.284	rC=N	r												0.011	0.007	0.022	0.008	0.011	0.003	-0.002	0.002		0.011	0.007	0.022	0.008	0.011	0.003	0.002	0.002
zn_nhch2-1_P2	rHN	2	3	x	x	1.025	1.025	1.03	1.054	1.035	1.039	1.026	1.021	1.025	rHN	r												0	0.005	0.029	0.01	0.014	0.001	-0.004	0		0	0.005	0.029	0.01	0.014	0.001	0.004	0
zn_nhch2-1_P2	rCH	4	5	x	x	1.087	1.084	1.091	1.111	1.104	1.096	1.089	1.086	1.089	rCH	r												-0.003	0.004	0.024	0.017	0.009	0.002	-0.001	0.002		0.003	0.004	0.024	0.017	0.009	0.002	0.001	0.002
zn_nhch2-1_P2	rCH	4	6	x	x	1.093	1.088	1.097	1.128	1.11	1.103	1.095	1.091	1.094	rCH	r												-0.005	0.004	0.035	0.017	0.01	0.002	-0.002	0.001		0.005	0.004	0.035	0.017	0.01	0.002	0.002	0.001
zn_nhch2-1_P2	aCNZn	4	2	1	x	129	128.6	128.9	126.3	130	129.6	129.1	129.2	129.1	aCNZn	a												-0.4	-0.1	-2.7	1	0.6	0.1	0.2	0.1		0.4	0.1	2.7	1	0.6	0.1	0.2	0.1
zn_nhch2-1_P2	aHNZn	3	2	1	x	114.2	116.5	114	116.4	115.3	114.9	114.6	114.8	114.6	aHNZn	a												2.3	-0.2	2.2	1.1	0.7	0.4	0.6	0.4		2.3	0.2	2.2	1.1	0.7	0.4	0.6	0.4
zn_nhch2-1_P2	aCNH	4	2	3	x	116.9	114.9	117	117.3	114.7	115.5	116.4	116.1	116.3	aCNH	a												-2	0.1	0.4	-2.2	-1.4	-0.5	-0.8	-0.6		2	0.1	0.4	2.2	1.4	0.5	0.8	0.6
zn_nhch2-1_P2	aHCN	5	4	2	x	122.6	121.5	122.7	125.7	121.8	122.1	122.4	122.4	122.4	aHCN	a												-1.1	0.1	3.1	-0.8	-0.5	-0.2	-0.2	-0.2		1.1	0.1	3.1	0.8	0.5	0.2	0.2	0.2
zn_nhch2-1_P2	aHCN	6	4	2	x	118.8	119.1	118.7	121	119.4	119	118.9	119	118.9	aHCN	a												0.3	-0.1	2.2	0.6	0.2	0.1	0.2	0.1		0.3	0.1	2.2	0.6	0.2	0.1	0.2	0.1
zn_nhch2-1_P2	aHCH	5	4	6	x	118.6	119.4	118.6	113.3	118.9	118.9	118.7	118.6	118.7	aHCH	a												0.8	0	-5.3	0.3	0.3	0.1	0	0.1		0.8	0	5.3	0.3	0.3	0.1	0	0.1
zn_nhch2-2_P2	rZnN	1	2	x	x	1.914	1.888	1.914	1.918	1.875	1.897	1.914	1.913	1.912	rZnN	r												-0.026	0	0.004	-0.039	-0.017	0	-0.001	-0.002		0.026	0	0.004	0.039	0.017	0	0.001	0.002
zn_nhch2-2_P2	rC=N	2	4	x	x	1.282	1.29	1.29	1.304	1.285	1.292	1.284	1.279	1.283	rC=N	r												0.008	0.008	0.022	0.003	0.01	0.002	-0.003	0.001		0.008	0.008	0.022	0.003	0.01	0.002	0.003	0.001
zn_nhch2-2_P2	rHN	3	2	x	x	1.022	1.022	1.026	1.053	1.029	1.033	1.022	1.018	1.022	rHN	r												0	0.004	0.031	0.007	0.011	0	-0.004	0		0	0.004	0.031	0.007	0.011	0	0.004	0
zn_nhch2-2_P2	rCH	4	5	x	x	1.088	1.085	1.092	1.119	1.104	1.096	1.09	1.087	1.089	rCH	r												-0.003	0.004	0.031	0.016	0.008	0.002	-0.001	0.001		0.003	0.004	0.031	0.016	0.008	0.002	0.001	0.001
zn_nhch2-2_P2	rCH	4	6	x	x	1.085	1.083	1.089	1.109	1.101	1.093	1.087	1.085	1.087	rCH	r												-0.002	0.004	0.024	0.016	0.008	0.002	0	0.002		0.002	0.004	0.024	0.016	0.008	0.002	0	0.002
zn_nhch2-2_P2	aCNZn	4	2	1	x	129.5	128.6	129.6	127	129	129	129.4	129.5	129.4	aCNZn	a												-0.9	0.1	-2.5	-0.5	-0.5	-0.1	0	-0.1		0.9	0.1	2.5	0.5	0.5	0.1	0	0.1
zn_nhch2-2_P2	aNZnN	2	1	7	x	177.8	178.1	177.3	179.8	177.7	177.9	177.9	177.8	177.9	aNZnN	a												0.3	-0.5	2	-0.1	0.1	0.1	0	0.1		0.3	0.5	2	0.1	0.1	0.1	0	0.1
zn_nhch2-2_P2	aHNZn	3	2	1	x	116.3	118	116.2	117.4	116.3	116.4	116.6	116.5	116.5	aHNZn	a												1.7	-0.1	1.1	0	0.1	0.3	0.2	0.2		1.7	0.1	1.1	0	0.1	0.3	0.2	0.2
zn_nhch2-2_P2	aCNH	4	2	3	x	114.3	113.4	114.2	115.7	114.8	114.5	114	113.9	114	aCNH	a												-0.9	-0.1	1.4	0.5	0.2	-0.3	-0.4	-0.3		0.9	0.1	1.4	0.5	0.2	0.3	0.4	0.3
zn_nhch2-2_P2	aHCN	5	4	2	x	120.3	120.1	120.2	122.4	120	119.9	120.3	120.3	120.3	aHCN	a												-0.2	-0.1	2.1	-0.3	-0.4	0	0	0		0.2	0.1	2.1	0.3	0.4	0	0	0
zn_nhch2-2_P2	aHCN	6	4	2	x	121.3	120.8	121.3	124.8	120.8	120.8	121.2	121.2	121.2	aHCN	a												-0.5	0	3.5	-0.5	-0.5	-0.1	-0.1	-0.1		0.5	0	3.5	0.5	0.5	0.1	0.1	0.1
zn_nhch2-2_P2	aHCH	5	4	6	x	118.4	119.1	118.5	112.8	119.2	119.3	118.5	118.4	118.5	aHCH	a												0.7	0.1	-5.6	0.8	0.9	0.1	0	0.1		0.7	0.1	5.6	0.8	0.9	0.1	0	0.1
zn_nhch2-3_P2	rZnN	1	2	x	x	1.995	1.963	1.996	1.953	1.963	2.003	1.997	1.991	1.995	rZnN	r												-0.032	0.001	-0.042	-0.032	0.008	0.002	-0.004	0		0.032	0.001	0.042	0.032	0.008	0.002	0.004	0
zn_nhch2-3_P2	rC=N	2	4	x	x	1.277	1.286	1.285	1.3	1.279	1.286	1.279	1.275	1.278	rC=N	r												0.009	0.008	0.023	0.002	0.009	0.002	-0.002	0.001		0.009	0.008	0.023	0.002	0.009	0.002	0.002	0.001
zn_nhch2-3_P2	rHN	3	2	x	x	1.02	1.02	1.024	1.047	1.027	1.031	1.021	1.016	1.02	rHN	r												0	0.004	0.027	0.007	0.011	0.001	-0.004	0		0	0.004	0.027	0.007	0.011	0.001	0.004	0
zn_nhch2-3_P2	rCH	4	5	x	x	1.087	1.085	1.091	1.113	1.103	1.095	1.089	1.086	1.088	rCH	r												-0.002	0.004	0.026	0.016	0.008	0.002	-0.001	0.001		0.002	0.004	0.026	0.016	0.008	0.002	0.001	0.001
zn_nhch2-3_P2	rCH	4	6	x	x	1.085	1.083	1.089	1.106	1.101	1.092	1.087	1.085	1.087	rCH	r												-0.002	0.004	0.021	0.016	0.007	0.002	0	0.002		0.002	0.004	0.021	0.016	0.007	0.002	0	0.002
zn_nhch2-3_P2	aCNZn	4	2	1	x	129.8	128.4	129.9	126.8	129	129.1	129.6	129.8	129.7	aCNZn	a												-1.4	0.1	-3	-0.8	-0.7	-0.2	0	-0.1		1.4	0.1	3	0.8	0.7	0.2	0	0.1
zn_nhch2-3_P2	aNZnN	2	1	7	x	122.4	121	122.4	121.8	122.4	122.1	122	122.3	122.1	aNZnN	a												-1.4	0	-0.6	0	-0.3	-0.4	-0.1	-0.3		1.4	0	0.6	0	0.3	0.4	0.1	0.3
zn_nhch2-3_P2	aHNZn	3	2	1	x	117.1	119.2	117	117.4	116.3	116.6	117.4	117.3	117.4	aHNZn	a												2.1	-0.1	0.3	-0.8	-0.5	0.3	0.2	0.3		2.1	0.1	0.3	0.8	0.5	0.3	0.2	0.3
zn_nhch2-3_P2	aCNH	4	2	3	x	113.1	112.3	113	115.8	114.7	114.2	112.9	112.8	113	aCNH	a												-0.8	-0.1	2.7	1.6	1.1	-0.2	-0.3	-0.1		0.8	0.1	2.7	1.6	1.1	0.2	0.3	0.1
zn_nhch2-3_P2	aHCN	5	4	2	x	121.4	121.2	121.3	123.4	120.6	120.6	121.4	121.4	121.4	aHCN	a												-0.2	-0.1	2	-0.8	-0.8	0	0	0		0.2	0.1	2	0.8	0.8	0	0	0
zn_nhch2-3_P2	aHCN	6	4	2	x	120.6	120.1	120.6	124.1	120.6	120.5	120.5	120.6	120.6	aHCN	a												-0.5	0	3.5	0	-0.1	-0.1	0	0		0.5	0	3.5	0	0.1	0.1	0	0
zn_nhch2-3_P2	aHCH	5	4	6	x	118	118.7	118.1	112.5	118.8	118.9	118.1	118	118.1	aHCH	a												0.7	0.1	-5.5	0.8	0.9	0.1	0	0.1		0.7	0.1	5.5	0.8	0.9	0.1	0	0.1
zn_nhch2-4_P2	rZnN	1	2	x	x	2.056	2.018	2.057	1.97	2.014	2.058	2.053	2.053	2.052	rZnN	r												-0.038	0.001	-0.086	-0.042	0.002	-0.003	-0.003	-0.004		0.038	0.001	0.086	0.042	0.002	0.003	0.003	0.004
zn_nhch2-4_P2	rC=N	2	4	x	x	1.274	1.283	1.282	1.295	1.274	1.282	1.276	1.271	1.275	rC=N	r												0.009	0.008	0.021	0	0.008	0.002	-0.003	0.001		0.009	0.008	0.021	0	0.008	0.002	0.003	0.001
zn_nhch2-4_P2	rHN	3	2	x	x	1.019	1.02	1.023	1.042	1.025	1.029	1.02	1.016	1.02	rHN	r												0.001	0.004	0.023	0.006	0.01	0.001	-0.003	0.001		0.001	0.004	0.023	0.006	0.01	0.001	0.003	0.001
zn_nhch2-4_P2	rCH	4	5	x	x	1.087	1.085	1.091	1.109	1.103	1.095	1.089	1.086	1.088	rCH	r												-0.002	0.004	0.022	0.016	0.008	0.002	-0.001	0.001		0.002	0.004	0.022	0.016	0.008	0.002	0.001	0.001
zn_nhch2-4_P2	rCH	4	6	x	x	1.085	1.083	1.089	1.102	1.101	1.093	1.087	1.085	1.087	rCH	r												-0.002	0.004	0.017	0.016	0.008	0.002	0	0.002		0.002	0.004	0.017	0.016	0.008	0.002	0	0.002
zn_nhch2-4_P2	aCNZn	4	2	1	x	130.5	128.5	130.4	127.7	129.5	129.7	130	130.6	130.2	aCNZn	a												-2	-0.1	-2.8	-1	-0.8	-0.5	0.1	-0.3		2	0.1	2.8	1	0.8	0.5	0.1	0.3
zn_nhch2-4_P2	aNZnN	2	1	7	x	108.3	108.5	108.2	108.3	108.6	108.6	108.4	108.3	108.4	aNZnN	a												0.2	-0.1	0	0.3	0.3	0.1	0	0.1		0.2	0.1	0	0.3	0.3	0.1	0	0.1
zn_nhch2-4_P2	aHNZn	3	2	1	x	117	119.7	117.2	116.3	115.8	116.3	117.7	117.2	117.5	aHNZn	a												2.7	0.2	-0.7	-1.2	-0.7	0.7	0.2	0.5		2.7	0.2	0.7	1.2	0.7	0.7	0.2	0.5
zn_nhch2-4_P2	aCNH	4	2	3	x	112.5	111.7	112.5	116.1	114.8	114	112.3	112.2	112.4	aCNH	a												-0.8	0	3.6	2.3	1.5	-0.2	-0.3	-0.1		0.8	0	3.6	2.3	1.5	0.2	0.3	0.1
zn_nhch2-4_P2	aHCN	5	4	2	x	122.1	121.9	122.1	123.9	121.1	121.2	122	122.1	122	aHCN	a												-0.2	0	1.8	-1	-0.9	-0.1	0	-0.1		0.2	0	1.8	1	0.9	0.1	0	0.1
zn_nhch2-4_P2	aHCN	6	4	2	x	120.2	119.5	120.1	123.8	120.4	120.3	120	120.1	120.1	aHCN	a												-0.7	-0.1	3.6	0.2	0.1	-0.2	-0.1	-0.1		0.7	0.1	3.6	0.2	0.1	0.2	0.1	0.1
zn_nhch2-4_P2	aHCH	5	4	6	x	117.7	118.6	117.9	112.3	118.5	118.5	117.9	117.8	117.9	aHCH	a												0.9	0.2	-5.4	0.8	0.8	0.2	0.1	0.2		0.9	0.2	5.4	0.8	0.8	0.2	0.1	0.2
zn_oh-1_P1	rZnO	1	2	x	x	1.766	1.747	1.767	1.969	1.735	1.742	1.765	1.757	1.762	rZnO	r												-0.019	0.001	0.203	-0.031	-0.024	-0.001	-0.009	-0.004		0.019	0.001	0.203	0.031	0.024	0.001	0.009	0.004
zn_oh-1_P1	rHO	3	2	x	x	0.972	0.973	0.976	1.004	0.977	0.975	0.97	0.965	0.969	rHO	r												0.001	0.004	0.032	0.005	0.003	-0.002	-0.007	-0.003		0.001	0.004	0.032	0.005	0.003	0.002	0.007	0.003
zn_oh-1_P1	aHOZn	3	2	1	x	113.8	113.6	114.1	110.8	129.5	123.8	113.7	114.2	113.8	aHOZn	a												-0.2	0.3	-3	15.7	10	-0.1	0.4	0		0.2	0.3	3	15.7	10	0.1	0.4	0
zn_oh-2	rZnO	1	2	x	x	1.776	1.759	1.772	1.579	1.791	1.781	1.778	1.772	1.775	rZnO	r												-0.017	-0.004	-0.197	0.015	0.005	0.002	-0.004	-0.001		0.017	0.004	0.197	0.015	0.005	0.002	0.004	0.001
zn_oh-2	rHO	2	3	x	x	0.961	0.962	0.965	0.858	0.967	0.963	0.96	0.956	0.959	rHO	r												0.001	0.004	-0.103	0.006	0.002	-0.001	-0.005	-0.002		0.001	0.004	0.103	0.006	0.002	0.001	0.005	0.002
zn_oh-2	aHOZn	3	2	1	x	115.4	115.4	115.7	179.4	122.4	120.4	115	115.2	115.3	aHOZn	a												0	0.3	64	7	5	-0.4	-0.2	-0.1		0	0.3	64	7	5	0.4	0.2	0.1
zn_oh-2	aOZnO	2	1	4	x	174.2	174.4	174.7	179.9	172.5	176.7	174.3	174.3	174.3	aOZnO	a												0.2	0.5	5.7	-1.7	2.5	0.1	0.1	0.1		0.2	0.5	5.7	1.7	2.5	0.1	0.1	0.1
zn_oh-sh	rZnS	1	4	x	x	2.164	2.132	2.167	2.059	2.143	2.184	2.166	2.156	2.166	rZnS	r												-0.032	0.003	-0.105	-0.021	0.02	0.002	-0.008	0.002		0.032	0.003	0.105	0.021	0.02	0.002	0.008	0.002
zn_oh-sh	rZnO	1	2	x	x	1.784	1.765	1.781	1.541	1.795	1.784	1.785	1.778	1.782	rZnO	r												-0.019	-0.003	-0.243	0.011	0	0.001	-0.006	-0.002		0.019	0.003	0.243	0.011	0	0.001	0.006	0.002
zn_oh-sh	rHO	3	2	x	x	0.961	0.962	0.965	0.889	0.968	0.963	0.96	0.955	0.959	rHO	r												0.001	0.004	-0.072	0.007	0.002	-0.001	-0.006	-0.002		0.001	0.004	0.072	0.007	0.002	0.001	0.006	0.002
zn_oh-sh	rHS	5	4	x	x	1.348	1.341	1.351	1.355	1.345	1.344	1.349	1.343	1.349	rHS	r												-0.007	0.003	0.007	-0.003	-0.004	0.001	-0.005	0.001		0.007	0.003	0.007	0.003	0.004	0.001	0.005	0.001
zn_oh-sh	aHOZn	3	2	1	x	116.2	116	116.4	179.7	123.5	120.9	115.7	115.9	116.1	aHOZn	a												-0.2	0.2	63.5	7.3	4.7	-0.5	-0.3	-0.1		0.2	0.2	63.5	7.3	4.7	0.5	0.3	0.1
zn_oh-sh	aHSZn	5	4	1	x	93.9	93.2	93.4	99.2	103.8	103.2	93.7	93.8	93.9	aHSZn	a												-0.7	-0.5	5.3	9.9	9.3	-0.2	-0.1	0		0.7	0.5	5.3	9.9	9.3	0.2	0.1	0
zn_oh-sh	aOZnS	2	1	4	x	175.6	175.9	175.8	175.8	173.2	176.3	175.8	175.9	175.7	aOZnS	a												0.3	0.2	0.2	-2.4	0.7	0.2	0.3	0.1		0.3	0.2	0.2	2.4	0.7	0.2	0.3	0.1
zn_o	rZnO	1	2	x	x	1.71	1.678	1.712	1.78	1.673	1.696	1.709	1.701	1.707	rZnO	r												-0.032	0.002	0.07	-0.037	-0.014	-0.001	-0.009	-0.003		0.032	0.002	0.07	0.037	0.014	0.001	0.009	0.003
zn_och3-1_P1	rZnO	1	2	x	x	1.788	1.751	1.79	1.999	1.766	1.769	1.785	1.774	1.78	rZnO	r												-0.037	0.002	0.211	-0.022	-0.019	-0.003	-0.014	-0.008		0.037	0.002	0.211	0.022	0.019	0.003	0.014	0.008
zn_och3-1_P1	rCO	3	2	x	x	1.429	1.46	1.431	1.386	1.437	1.417	1.427	1.423	1.427	rCO	r												0.031	0.002	-0.043	0.008	-0.012	-0.002	-0.006	-0.002		0.031	0.002	0.043	0.008	0.012	0.002	0.006	0.002
zn_och3-1_P1	rCH	3	4	x	x	1.089	1.085	1.093	1.097	1.103	1.098	1.091	1.088	1.091	rCH	r												-0.004	0.004	0.008	0.014	0.009	0.002	-0.001	0.002		0.004	0.004	0.008	0.014	0.009	0.002	0.001	0.002
zn_och3-1_P1	aCOZn	3	2	1	x	125.6	124.4	125.5	125.7	128	125.2	125.4	125.4	125.4	aCOZn	a												-1.2	-0.1	0.1	2.4	-0.4	-0.2	-0.2	-0.2		1.2	0.1	0.1	2.4	0.4	0.2	0.2	0.2
zn_och3-1_P1	aHCO	4	3	2	x	112.6	111.2	112.6	116.1	111.1	111.9	112.5	112.6	112.6	aHCO	a												-1.4	0	3.5	-1.5	-0.7	-0.1	0	0		1.4	0	3.5	1.5	0.7	0.1	0	0
zn_och3-2	rZnO	1	2	x	x	1.773	1.755	1.77	1.62	1.812	1.79	1.775	1.768	1.772	rZnO	r												-0.018	-0.003	-0.153	0.039	0.017	0.002	-0.005	-0.001		0.018	0.003	0.153	0.039	0.017	0.002	0.005	0.001
zn_och3-2	rCO	3	2	x	x	1.415	1.42	1.419	1.398	1.426	1.406	1.412	1.404	1.41	rCO	r												0.005	0.004	-0.017	0.011	-0.009	-0.003	-0.011	-0.005		0.005	0.004	0.017	0.011	0.009	0.003	0.011	0.005
zn_och3-2	rCH	3	4	x	x	1.093	1.09	1.097	1.106	1.106	1.101	1.096	1.093	1.095	rCH	r												-0.003	0.004	0.013	0.013	0.008	0.003	0	0.002		0.003	0.004	0.013	0.013	0.008	0.003	0	0.002
zn_och3-2	aCOZn	3	2	1	x	126.6	125.6	126.4	136.2	124.7	123.4	125.8	126.3	126.3	aCOZn	a												-1	-0.2	9.6	-1.9	-3.2	-0.8	-0.3	-0.3		1	0.2	9.6	1.9	3.2	0.8	0.3	0.3
zn_och3-2	aOZnO	2	1	7	x	172.3	173.7	172.5	175.6	167.5	171.6	172.5	172.7	172.6	aOZnO	a												1.4	0.2	3.3	-4.8	-0.7	0.2	0.4	0.3		1.4	0.2	3.3	4.8	0.7	0.2	0.4	0.3
zn_och3-2	aHZnO	4	3	2	x	108	107.9	107.8	103.5	109	109.2	108.1	108.3	108.2	aHZnO	a												-0.1	-0.2	-4.5	1	1.2	0.1	0.3	0.2		0.1	0.2	4.5	1	1.2	0.1	0.3	0.2
zn_ph2-1_P1	rZnP	2	1	x	x	2.334	2.283	2.335	2.127	-	2.312	2.326	2.311	2.328	rZnP	r												-0.051	0.001	-0.207	#VALUE!	-0.022	-0.008	-0.023	-0.006		0.051	0.001	0.207	#VALUE!	0.022	0.008	0.023	0.006
zn_ph2-1_P1	rHP	3	1	x	x	1.426	1.421	1.428	1.464	-	1.425	1.427	1.425	1.425	rHP	r												-0.005	0.002	0.038	#VALUE!	-0.001	0.001	-0.001	-0.001		0.005	0.002	0.038	#VALUE!	0.001	0.001	0.001	0.001
zn_ph2-1_P1	aHPZn	3	1	2	x	89.5	87.9	89.7	106.6	-	96.7	89.1	89.2	89.3	aHPZn	a												-1.6	0.2	17.1	#VALUE!	7.2	-0.4	-0.3	-0.2		1.6	0.2	17.1	#VALUE!	7.2	0.4	0.3	0.2
zn_ph2-1_P1	aHPH	3	1	4	x	92.9	92.8	93.2	101.9	-	96.3	92.8	92.8	92.9	aHPH	a												-0.1	0.3	9	#VALUE!	3.4	-0.1	-0.1	0		0.1	0.3	9	#VALUE!	3.4	0.1	0.1	0
zn_ph2-2	rZnP	1	2	x	x	2.312	2.267	2.314	1.759	2.216	2.355	2.314	2.3	2.314	rZnP	r												-0.045	0.002	-0.553	-0.096	0.043	0.002	-0.012	0.002		0.045	0.002	0.553	0.096	0.043	0.002	0.012	0.002
zn_ph2-2	rHP	2	4	x	x	1.424	1.418	1.428	1.448	1.419	1.422	1.425	1.423	1.423	rHP	r												-0.006	0.004	0.024	-0.005	-0.002	0.001	-0.001	-0.001		0.006	0.004	0.024	0.005	0.002	0.001	0.001	0.001
zn_ph2-2	aHPZn	4	2	1	x	92.7	92.3	92.1	126.4	101.6	98.1	92.3	92.4	92.5	aHPZn	a												-0.4	-0.6	33.7	8.9	5.4	-0.4	-0.3	-0.2		0.4	0.6	33.7	8.9	5.4	0.4	0.3	0.2
zn_ph2-2	aPZnP	2	1	3	x	176	176.6	176.3	180	168.3	175	176.4	176.6	176.3	aPZnP	a												0.6	0.3	4	-7.7	-1	0.4	0.6	0.3		0.6	0.3	4	7.7	1	0.4	0.6	0.3
zn_ph2-2	aHPH	4	2	5	x	93.4	93.3	93.5	107.2	97	96.3	93.3	93.2	93.4	aHPH	a												-0.1	0.1	13.8	3.6	2.9	-0.1	-0.2	0		0.1	0.1	13.8	3.6	2.9	0.1	0.2	0
zn_ph3-1_P2	rZnP	1	2	x	x	2.39	2.342	2.39	2.187	2.28	2.383	2.388	2.377	2.389	rZnP	r												-0.048	0	-0.203	-0.11	-0.007	-0.002	-0.013	-0.001		0.048	0	0.203	0.11	0.007	0.002	0.013	0.001
zn_ph3-1_P2	rHP	3	1	x	x	1.41	1.402	1.41	1.472	1.42	1.418	1.41	1.409	1.409	rHP	r												-0.008	0	0.062	0.01	0.008	0	-0.001	-0.001		0.008	0	0.062	0.01	0.008	0	0.001	0.001
zn_ph3-1_P2	aHPZn	3	1	2	x	108	108.5	108	111.9	113.1	111.6	108.4	108.6	108.4	aHPZn	a												0.5	0	3.9	5.1	3.6	0.4	0.6	0.4		0.5	0	3.9	5.1	3.6	0.4	0.6	0.4
zn_ph3-1_P2	aHPH	3	1	4	x	110.9	110.5	110.9	107	105.6	107.3	110.6	110.4	110.5	aHPH	a												-0.4	0	-3.9	-5.3	-3.6	-0.3	-0.5	-0.4		0.4	0	3.9	5.3	3.6	0.3	0.5	0.4
zn_ph3-2_P2	rZnP	1	2	x	x	2.372	2.33	2.375	2.071	2.367	2.398	2.374	2.366	2.375	rZnP	r												-0.042	0.003	-0.301	-0.005	0.026	0.002	-0.006	0.003		0.042	0.003	0.301	0.005	0.026	0.002	0.006	0.003
zn_ph3-2_P2	rHP	1	7	x	x	1.406	1.4	1.406	1.47	1.413	1.411	1.407	1.406	1.405	rHP	r												-0.006	0	0.064	0.007	0.005	0.001	0	-0.001		0.006	0	0.064	0.007	0.005	0.001	0	0.001
zn_ph3-2_P2	aPZnP	1	2	6	x	180	180	180	180	180	180	180	179.9	179.9	aPZnP	a												0	0	0	0	0	0	-0.1	-0.1		0	0	0	0	0	0	0.1	0.1
zn_ph3-2_P2	aHPZn	7	1	2	x	112.2	112.1	112.2	113.7	114.3	113.6	112.3	112.4	112.3	aHPZn	a												-0.1	0	1.5	2.1	1.4	0.1	0.2	0.1		0.1	0	1.5	2.1	1.4	0.1	0.2	0.1
zn_ph3-2_P2	aHPH	7	1	8	x	106.6	106.8	106.5	104.9	104.2	105	106.5	106.4	106.5	aHPH	a												0.2	-0.1	-1.7	-2.4	-1.6	-0.1	-0.2	-0.1		0.2	0.1	1.7	2.4	1.6	0.1	0.2	0.1
zn_ph3-3_P2	rZnP	1	2	x	x	2.434	2.381	2.438	2.092	2.496	2.457	2.434	2.426	2.435	rZnP	r												-0.053	0.004	-0.342	0.062	0.023	0	-0.008	0.001		0.053	0.004	0.342	0.062	0.023	0	0.008	0.001
zn_ph3-3_P2	rHP	1	11	x	x	1.406	1.4	1.407	1.466	1.412	1.41	1.407	1.406	1.405	rHP	r												-0.006	0.001	0.06	0.006	0.004	0.001	0	-0.001		0.006	0.001	0.06	0.006	0.004	0.001	0	0.001
zn_ph3-3_P2	aPZnP	1	2	6	x	120	120	120	120	120	120	120	120	120	aPZnP	a												0	0	0	0	0	0	0	0		0	0	0	0	0	0	0	0
zn_ph3-3_P2	aHPZn	11	1	2	x	114.3	114	114.3	113.2	115.2	115.1	114.3	114.3	114.3	aHPZn	a												-0.3	0	-1.1	0.9	0.8	0	0	0		0.3	0	1.1	0.9	0.8	0	0	0
zn_ph3-3_P2	aHPH	11	1	12	x	103.6	104	103.6	104.6	102.9	103	103.6	103.6	103.6	aHPH	a												0.4	0	1	-0.7	-0.6	0	0	0		0.4	0	1	0.7	0.6	0	0	0
zn_ph3-4_P2	rZnP	1	2	x	x	2.478	2.408	2.482	2.09	2.559	2.494	2.475	2.467	2.476	rZnP	r												-0.07	0.004	-0.388	0.081	0.016	-0.003	-0.011	-0.002		0.07	0.004	0.388	0.081	0.016	0.003	0.011	0.002
zn_ph3-4_P2	rHP	6	2	x	x	1.407	1.401	1.408	1.459	1.412	1.41	1.407	1.406	1.406	rHP	r												-0.006	0.001	0.052	0.005	0.003	0	-0.001	-0.001		0.006	0.001	0.052	0.005	0.003	0	0.001	0.001
zn_ph3-4_P2	aPZnP	2	1	3	x	109.5	109.5	109.5	109.5	109.5	109.5	109.5	109.5	109.5	aPZnP	a												0	0	0	0	0	0	0	0		0	0	0	0	0	0	0	0
zn_ph3-4_P2	aHPZn	6	2	1	x	116.3	116	116.3	114.1	116.2	116.3	116.3	116.3	116.3	aHPZn	a												-0.3	0	-2.2	-0.1	0	0	0	0		0.3	0	2.2	0.1	0	0	0	0
zn_ph3-4_P2	aHPH	6	2	7	x	101.9	102.3	101.8	104.4	101.9	101.9	101.9	101.8	101.9	aHPH	a												0.4	-0.1	2.5	0	0	0	-0.1	0		0.4	0.1	2.5	0	0	0	0.1	0
zn_sch3-1_P1	rZnS	1	2	x	x	2.186	2.138	2.19	2.265	2.105	2.176	2.178	2.166	2.178	rZnS	r												-0.048	0.004	0.079	-0.081	-0.01	-0.008	-0.02	-0.008		0.048	0.004	0.079	0.081	0.01	0.008	0.02	0.008
zn_sch3-1_P1	rCS	3	2	x	x	1.833	1.835	1.839	1.777	1.82	1.825	1.839	1.821	1.841	rCS	r												0.002	0.006	-0.056	-0.013	-0.008	0.006	-0.012	0.008		0.002	0.006	0.056	0.013	0.008	0.006	0.012	0.008
zn_sch3-1_P1	rCH	4	3	x	x	1.084	1.084	1.089	1.102	1.099	1.09	1.087	1.084	1.086	rCH	r												0	0.005	0.018	0.015	0.006	0.003	0	0.002		0	0.005	0.018	0.015	0.006	0.003	0	0.002
zn_sch3-1_P1	rCH	5	3	x	x	1.084	1.084	1.089	1.102	1.099	1.09	1.087	1.084	1.086	rCH	r												0	0.005	0.018	0.015	0.006	0.003	0	0.002		0	0.005	0.018	0.015	0.006	0.003	0	0.002
zn_sch3-1_P1	rCH	6	3	x	x	1.094	1.09	1.098	1.116	1.101	1.093	1.095	1.092	1.094	rCH	r												-0.004	0.004	0.022	0.007	-0.001	0.001	-0.002	0		0.004	0.004	0.022	0.007	0.001	0.001	0.002	0
zn_sch3-1_P1	aCSZn	3	2	1	x	105.9	103.5	105.9	107.2	109.5	108.2	105.5	105.7	105.5	aCSZn	a												-2.4	0	1.3	3.6	2.3	-0.4	-0.2	-0.4		2.4	0	1.3	3.6	2.3	0.4	0.2	0.4
zn_sch3-1_P1	aHCS	4	3	2	x	111.9	111.4	112.2	115.7	112.2	112	111.8	112	111.7	aHCS	a												-0.5	0.3	3.8	0.3	0.1	-0.1	0.1	-0.2		0.5	0.3	3.8	0.3	0.1	0.1	0.1	0.2
zn_sch3-1_P1	aHCS	5	3	2	x	111.9	111.4	112.2	115.7	112.2	112	111.8	112	111.7	aHCS	a												-0.5	0.3	3.8	0.3	0.1	-0.1	0.1	-0.2		0.5	0.3	3.8	0.3	0.1	0.1	0.1	0.2
zn_sch3-1_P1	aHCS	6	3	2	x	101.7	102	101.9	106.2	106.6	105.1	101.7	101.9	101.7	aHCS	a												0.3	0.2	4.5	4.9	3.4	0	0.2	0		0.3	0.2	4.5	4.9	3.4	0	0.2	0
zn_sch3-2	rZnS	1	2	x	x	2.179	2.141	2.184	2.11	2.171	2.196	2.179	2.169	2.179	rZnS	r												-0.038	0.005	-0.069	-0.008	0.017	0	-0.01	0		0.038	0.005	0.069	0.008	0.017	0	0.01	0
zn_sch3-2	rCS	3	4	x	x	1.849	1.836	1.854	1.818	1.834	1.839	1.851	1.832	1.852	rCS	r												-0.013	0.005	-0.031	-0.015	-0.01	0.002	-0.017	0.003		0.013	0.005	0.031	0.015	0.01	0.002	0.017	0.003
zn_sch3-2	rCH	5	4	x	x	1.086	1.086	1.091	1.094	1.098	1.09	1.089	1.086	1.088	rCH	r												0	0.005	0.008	0.012	0.004	0.003	0	0.002		0	0.005	0.008	0.012	0.004	0.003	0	0.002
zn_sch3-2	rCH	6	4	x	x	1.086	1.086	1.091	1.094	1.098	1.09	1.088	1.086	1.088	rCH	r												0	0.005	0.008	0.012	0.004	0.002	0	0.002		0	0.005	0.008	0.012	0.004	0.002	0	0.002
zn_sch3-2	rCH	7	4	x	x	1.087	1.087	1.092	1.101	1.096	1.088	1.09	1.087	1.089	rCH	r												0	0.005	0.014	0.009	0.001	0.003	0	0.002		0	0.005	0.014	0.009	0.001	0.003	0	0.002
zn_sch3-2	aSZnS	2	1	3	x	177.9	179.4	177.9	176.2	175.8	177.2	178.3	178.2	178.3	aSZnS	a												1.5	0	-1.7	-2.1	-0.7	0.4	0.3	0.4		1.5	0	1.7	2.1	0.7	0.4	0.3	0.4
zn_sch3-2	aCSZn	4	3	1	x	103.5	101.6	102.9	107.3	105.4	105.1	103	103.4	103.1	aCSZn	a												-1.9	-0.6	3.8	1.9	1.6	-0.5	-0.1	-0.4		1.9	0.6	3.8	1.9	1.6	0.5	0.1	0.4
zn_sch3-2	aHCS	5	4	3	x	111.5	111.4	111.7	112.8	111.4	111.2	111.4	111.7	111.4	aHCS	a												-0.1	0.2	1.3	-0.1	-0.3	-0.1	0.2	-0.1		0.1	0.2	1.3	0.1	0.3	0.1	0.2	0.1
zn_sch3-2	aHCS	6	4	3	x	111.4	111.3	111.7	112.7	111.4	111.2	111.3	111.6	111.3	aHCS	a												-0.1	0.3	1.3	0	-0.2	-0.1	0.2	-0.1		0.1	0.3	1.3	0	0.2	0.1	0.2	0.1
zn_sch3-2	aHCS	7	4	3	x	106	106.1	106.1	106.3	109.1	108.1	105.9	106.1	105.9	aHCS	a												0.1	0.1	0.3	3.1	2.1	-0.1	0.1	-0.1		0.1	0.1	0.3	3.1	2.1	0.1	0.1	0.1
zn_sh-1_P1	rZnS	1	2	x	x	2.168	2.129	2.17	2.257	2.09	2.17	2.164	2.151	2.164	rZnS	r												-0.039	0.002	0.089	-0.078	0.002	-0.004	-0.017	-0.004		0.039	0.002	0.089	0.078	0.002	0.004	0.017	0.004
zn_sh-1_P1	rHS	3	2	x	x	1.355	1.349	1.357	1.36	1.352	1.353	1.357	1.351	1.356	rHS	r												-0.006	0.002	0.005	-0.003	-0.002	0.002	-0.004	0.001		0.006	0.002	0.005	0.003	0.002	0.002	0.004	0.001
zn_sh-1_P1	aHSZn	3	2	1	x	92	90.5	92.1	97.9	104.4	102.8	91.8	91.8	91.9	aHSZn	a												-1.5	0.1	5.9	12.4	10.8	-0.2	-0.2	-0.1		1.5	0.1	5.9	12.4	10.8	0.2	0.2	0.1
zn_sh2-1_P2	rZnS	1	2	x	x	2.337	2.284	2.336	2.369	2.221	2.257	2.331	2.323	2.333	rZnS	r												-0.053	-0.001	0.032	-0.116	-0.08	-0.006	-0.014	-0.004		0.053	0.001	0.032	0.116	0.08	0.006	0.014	0.004
zn_sh2-1_P2	rHS	3	2	x	x	1.37	1.361	1.369	1.359	1.364	1.364	1.371	1.364	1.37	rHS	r												-0.009	-0.001	-0.011	-0.006	-0.006	0.001	-0.006	0		0.009	0.001	0.011	0.006	0.006	0.001	0.006	0
zn_sh2-1_P2	aHSZn	3	2	1	x	96.3	95.8	97	98.5	112.5	110.7	96.2	96.4	96.3	aHSZn	a												-0.5	0.7	2.2	16.2	14.4	-0.1	0.1	0		0.5	0.7	2.2	16.2	14.4	0.1	0.1	0
zn_sh2-1_P2	aHSH	4	2	3	x	94.3	94.3	95.2	97	101.7	100.9	94.3	94.3	94.4	aHSH	a												0	0.9	2.7	7.4	6.6	0	0	0.1		0	0.9	2.7	7.4	6.6	0	0	0.1
zn_sh2-2_P2	rZnS	1	2	x	x	2.325	2.276	2.325	2.25	2.238	2.268	2.323	2.317	2.324	rZnS	r												-0.049	0	-0.075	-0.087	-0.057	-0.002	-0.008	-0.001		0.049	0	0.075	0.087	0.057	0.002	0.008	0.001
zn_sh2-2_P2	rHS	6	2	x	x	1.361	1.353	1.361	1.358	1.356	1.354	1.363	1.356	1.362	rHS	r												-0.008	0	-0.003	-0.005	-0.007	0.002	-0.005	0.001		0.008	0	0.003	0.005	0.007	0.002	0.005	0.001
zn_sh2-2_P2	aHSZn	6	2	1	x	97.6	97.3	98.1	104.4	112.3	110.9	97.6	97.7	97.6	aHSZn	a												-0.3	0.5	6.8	14.7	13.3	0	0.1	0		0.3	0.5	6.8	14.7	13.3	0	0.1	0
zn_sh2-2_P2	aSZnS	2	1	3	x	175.2	175.7	174.2	169.9	165.4	169.7	175.3	175.3	175.3	aSZnS	a												0.5	-1	-5.3	-9.8	-5.5	0.1	0.1	0.1		0.5	1	5.3	9.8	5.5	0.1	0.1	0.1
zn_sh2-2_P2	aHSH	4	3	5	x	94.4	94.3	95.2	97.5	101.7	100.8	94.3	94.3	94.4	aHSH	a												-0.1	0.8	3.1	7.3	6.4	-0.1	-0.1	0		0.1	0.8	3.1	7.3	6.4	0.1	0.1	0
zn_sh2-3_P2	rZnS	1	2	x	x	2.396	2.339	2.393	2.28	2.31	2.354	2.394	2.385	2.395	rZnS	r												-0.057	-0.003	-0.116	-0.086	-0.042	-0.002	-0.011	-0.001		0.057	0.003	0.116	0.086	0.042	0.002	0.011	0.001
zn_sh2-3_P2	rHS	9	2	x	x	1.355	1.347	1.356	1.354	1.352	1.35	1.356	1.35	1.356	rHS	r												-0.008	0.001	-0.001	-0.003	-0.005	0.001	-0.005	0.001		0.008	0.001	0.001	0.003	0.005	0.001	0.005	0.001
zn_sh2-3_P2	aHSZn	9	2	1	x	99.7	99.8	100.1	107.8	113.3	112.3	99.7	99.9	99.6	aHSZn	a												0.1	0.4	8.1	13.6	12.6	0	0.2	-0.1		0.1	0.4	8.1	13.6	12.6	0	0.2	0.1
zn_sh2-3_P2	aSZnS	2	1	4	x	120	118.9	119.7	118.5	119	118.8	119.1	119.6	120	aSZnS	a												-1.1	-0.3	-1.5	-1	-1.2	-0.9	-0.4	0		1.1	0.3	1.5	1	1.2	0.9	0.4	0
zn_sh2-3_P2	aHSH	9	2	10	x	94	94	94.8	97.6	100.9	100	93.9	93.9	94	aHSH	a												0	0.8	3.6	6.9	6	-0.1	-0.1	0		0	0.8	3.6	6.9	6	0.1	0.1	0
zn_sh2-4_P2	rZnS	1	2	x	x	2.472	2.404	2.468	2.329	2.384	2.429	2.465	2.459	2.466	rZnS	r												-0.068	-0.004	-0.143	-0.088	-0.043	-0.007	-0.013	-0.006		0.068	0.004	0.143	0.088	0.043	0.007	0.013	0.006
zn_sh2-4_P2	rHS	2	6	x	x	1.352	1.345	1.353	1.355	1.351	1.349	1.354	1.348	1.353	rHS	r												-0.007	0.001	0.003	-0.001	-0.003	0.002	-0.004	0.001		0.007	0.001	0.003	0.001	0.003	0.002	0.004	0.001
zn_sh2-4_P2	aHSZn	6	2	1	x	101.6	101.4	102.5	108.1	110.8	110.8	101.5	101.6	101.6	aHSZn	a												-0.2	0.9	6.5	9.2	9.2	-0.1	0	0		0.2	0.9	6.5	9.2	9.2	0.1	0	0
zn_sh2-4_P2	aSZnS	2	1	3	x	106.2	106	106.4	109.8	109.9	110	106.2	106.1	106.2	aSZnS	a												-0.2	0.2	3.6	3.7	3.8	0	-0.1	0		0.2	0.2	3.6	3.7	3.8	0	0.1	0
zn_sh2-4_P2	aHSH	6	2	7	x	94	93.8	94.6	97.6	100	99.4	93.9	93.9	94	aHSH	a												-0.2	0.6	3.6	6	5.4	-0.1	-0.1	0		0.2	0.6	3.6	6	5.4	0.1	0.1	0
zn_sh-2	rZnS	1	2	x	x	2.179	2.143	2.183	2.113	2.154	2.189	2.18	2.169	2.18	rZnS	r												-0.036	0.004	-0.066	-0.025	0.01	0.001	-0.01	0.001		0.036	0.004	0.066	0.025	0.01	0.001	0.01	0.001
zn_sh-2	rHS	3	2	x	x	1.348	1.341	1.351	1.356	1.345	1.344	1.349	1.343	1.349	rHS	r												-0.007	0.003	0.008	-0.003	-0.004	0.001	-0.005	0.001		0.007	0.003	0.008	0.003	0.004	0.001	0.005	0.001
zn_sh-2	aHSZn	3	2	1	x	93.8	92.9	93.2	101.9	103.7	103	93.5	93.6	93.7	aHSZn	a												-0.9	-0.6	8.1	9.9	9.2	-0.3	-0.2	-0.1		0.9	0.6	8.1	9.9	9.2	0.3	0.2	0.1
zn_shch3-1_P2	rZnS	1	2	x	x	2.331	2.265	2.332	2.368	2.223	2.265	2.32	2.312	2.319	rZnS	r												-0.066	0.001	0.037	-0.108	-0.066	-0.011	-0.019	-0.012		0.066	0.001	0.037	0.108	0.066	0.011	0.019	0.012
zn_shch3-1_P2	rHS	3	2	x	x	1.364	1.356	1.365	1.349	1.365	1.365	1.366	1.359	1.365	rHS	r												-0.008	0.001	-0.015	0.001	0.001	0.002	-0.005	0.001		0.008	0.001	0.015	0.001	0.001	0.002	0.005	0.001
zn_shch3-1_P2	rCS	4	2	x	x	1.854	1.849	1.862	1.714	1.835	1.846	1.858	1.835	1.861	rCS	r												-0.005	0.008	-0.14	-0.019	-0.008	0.004	-0.019	0.007		0.005	0.008	0.14	0.019	0.008	0.004	0.019	0.007
zn_shch3-1_P2	rCH	4	5	x	x	1.086	1.085	1.091	1.118	1.105	1.094	1.088	1.085	1.088	rCH	r												-0.001	0.005	0.032	0.019	0.008	0.002	-0.001	0.002		0.001	0.005	0.032	0.019	0.008	0.002	0.001	0.002
zn_shch3-1_P2	rCH	4	6	x	x	1.088	1.088	1.092	1.126	1.104	1.093	1.09	1.087	1.09	rCH	r												0	0.004	0.038	0.016	0.005	0.002	-0.001	0.002		0	0.004	0.038	0.016	0.005	0.002	0.001	0.002
zn_shch3-1_P2	rCH	4	7	x	x	1.096	1.092	1.101	1.139	1.112	1.101	1.098	1.095	1.097	rCH	r												-0.004	0.005	0.043	0.016	0.005	0.002	-0.001	0.001		0.004	0.005	0.043	0.016	0.005	0.002	0.001	0.001
zn_shch3-1_P2	aCSZn	4	2	1	x	109.8	107.9	110	106.5	116.6	115.8	109.6	109.8	109.6	aCSZn	a												-1.9	0.2	-3.3	6.8	6	-0.2	0	-0.2		1.9	0.2	3.3	6.8	6	0.2	0	0.2
zn_shch3-1_P2	aHSZn	3	2	1	x	94.7	94.9	95.4	98.4	106.4	105.2	94.8	95	94.9	aHSZn	a												0.2	0.7	3.7	11.7	10.5	0.1	0.3	0.2		0.2	0.7	3.7	11.7	10.5	0.1	0.3	0.2
zn_shch3-1_P2	aHSC	3	2	4	x	100.1	100.2	100.5	103.4	102.1	102.1	100.2	100.4	100.2	aHSC	a												0.1	0.4	3.3	2	2	0.1	0.3	0.1		0.1	0.4	3.3	2	2	0.1	0.3	0.1
zn_shch3-1_P2	aHCS	5	4	2	x	111.8	111.4	112.1	123.1	112.7	112.2	111.7	112.1	111.6	aHCS	a												-0.4	0.3	11.3	0.9	0.4	-0.1	0.3	-0.2		0.4	0.3	11.3	0.9	0.4	0.1	0.3	0.2
zn_shch3-1_P2	aHCS	6	4	2	x	106.8	106.1	107.2	116.1	110.3	109.7	106.5	106.8	106.5	aHCS	a												-0.7	0.4	9.3	3.5	2.9	-0.3	0	-0.3		0.7	0.4	9.3	3.5	2.9	0.3	0	0.3
zn_shch3-1_P2	aHCS	7	4	2	x	101.7	102.3	102.1	111.4	107.4	105.7	101.7	102.1	101.7	aHCS	a												0.6	0.4	9.7	5.7	4	0	0.4	0		0.6	0.4	9.7	5.7	4	0	0.4	0
zn_shch3-2_P2	rZnS	1	2	x	x	2.303	2.253	2.306	2.225	2.244	2.272	2.299	2.294	2.3	rZnS	r												-0.05	0.003	-0.078	-0.059	-0.031	-0.004	-0.009	-0.003		0.05	0.003	0.078	0.059	0.031	0.004	0.009	0.003
zn_shch3-2_P2	rHS	4	3	x	x	1.356	1.349	1.357	1.352	1.358	1.357	1.358	1.352	1.357	rHS	r												-0.007	0.001	-0.004	0.002	0.001	0.002	-0.004	0.001		0.007	0.001	0.004	0.002	0.001	0.002	0.004	0.001
zn_shch3-2_P2	rCS	6	3	x	x	1.86	1.843	1.868	1.756	1.841	1.85	1.863	1.84	1.865	rCS	r												-0.017	0.008	-0.104	-0.019	-0.01	0.003	-0.02	0.005		0.017	0.008	0.104	0.019	0.01	0.003	0.02	0.005
zn_shch3-2_P2	rCH	6	7	x	x	1.087	1.087	1.091	1.114	1.1	1.09	1.089	1.086	1.088	rCH	r												0	0.004	0.027	0.013	0.003	0.002	-0.001	0.001		0	0.004	0.027	0.013	0.003	0.002	0.001	0.001
zn_shch3-2_P2	rCH	6	8	x	x	1.084	1.084	1.089	1.107	1.101	1.09	1.086	1.084	1.086	rCH	r												0	0.005	0.023	0.017	0.006	0.002	0	0.002		0	0.005	0.023	0.017	0.006	0.002	0	0.002
zn_shch3-2_P2	rCH	6	9	x	x	1.088	1.088	1.093	1.125	1.103	1.092	1.091	1.088	1.09	rCH	r												0	0.005	0.037	0.015	0.004	0.003	0	0.002		0	0.005	0.037	0.015	0.004	0.003	0	0.002
zn_shch3-2_P2	aCSZn	6	3	1	x	109.1	107.6	109.1	109.8	115.7	114.5	108.9	109.2	109	aCSZn	a												-1.5	0	0.7	6.6	5.4	-0.2	0.1	-0.1		1.5	0	0.7	6.6	5.4	0.2	0.1	0.1
zn_shch3-2_P2	aSZnS	3	1	2	x	178	180	177.4	169.9	164.2	171.1	177.9	177.9	177.9	aSZnS	a												2	-0.6	-8.1	-13.8	-6.9	-0.1	-0.1	-0.1		2	0.6	8.1	13.8	6.9	0.1	0.1	0.1
zn_shch3-2_P2	aHSZn	4	3	1	x	96.6	96.9	97	104.9	107.3	106.2	96.6	96.8	96.7	aHSZn	a												0.3	0.4	8.3	10.7	9.6	0	0.2	0.1		0.3	0.4	8.3	10.7	9.6	0	0.2	0.1
zn_shch3-2_P2	aHSC	4	3	6	x	99.9	99.8	100.2	102.3	101.7	101.6	99.9	100.1	99.9	aHSC	a												-0.1	0.3	2.4	1.8	1.7	0	0.2	0		0.1	0.3	2.4	1.8	1.7	0	0.2	0
zn_shch3-2_P2	aHCS	7	6	3	x	106.2	106	106.5	113.6	109.3	108.7	106	106.3	106	aHCS	a												-0.2	0.3	7.4	3.1	2.5	-0.2	0.1	-0.2		0.2	0.3	7.4	3.1	2.5	0.2	0.1	0.2
zn_shch3-2_P2	aHCS	8	6	3	x	111.4	111.3	111.6	119.1	111.6	111.1	111.2	111.6	111.2	aHCS	a												-0.1	0.2	7.7	0.2	-0.3	-0.2	0.2	-0.2		0.1	0.2	7.7	0.2	0.3	0.2	0.2	0.2
zn_shch3-2_P2	aHCS	9	6	3	x	104.1	104.4	104.4	110.8	108.7	107.3	104	104.4	104	aHCS	a												0.3	0.3	6.7	4.6	3.2	-0.1	0.3	-0.1		0.3	0.3	6.7	4.6	3.2	0.1	0.3	0.1
zn_shch3-3_P2	rZnS	1	2	x	x	2.377	2.315	2.38	2.257	2.322	2.362	2.372	2.366	2.373	rZnS	r												-0.062	0.003	-0.12	-0.055	-0.015	-0.005	-0.011	-0.004		0.062	0.003	0.12	0.055	0.015	0.005	0.011	0.004
zn_shch3-3_P2	rHS	7	2	x	x	1.352	1.345	1.353	1.35	1.355	1.353	1.353	1.347	1.353	rHS	r												-0.007	0.001	-0.002	0.003	0.001	0.001	-0.005	0.001		0.007	0.001	0.002	0.003	0.001	0.001	0.005	0.001
zn_shch3-3_P2	rCS	12	2	x	x	1.848	1.831	1.856	1.768	1.837	1.844	1.851	1.829	1.852	rCS	r												-0.017	0.008	-0.08	-0.011	-0.004	0.003	-0.019	0.004		0.017	0.008	0.08	0.011	0.004	0.003	0.019	0.004
zn_shch3-3_P2	rCH	12	13	x	x	1.087	1.087	1.091	1.119	1.1	1.09	1.089	1.086	1.088	rCH	r												0	0.004	0.032	0.013	0.003	0.002	-0.001	0.001		0	0.004	0.032	0.013	0.003	0.002	0.001	0.001
zn_shch3-3_P2	rCH	12	14	x	x	1.086	1.087	1.091	1.11	1.099	1.089	1.089	1.086	1.088	rCH	r												0.001	0.005	0.024	0.013	0.003	0.003	0	0.002		0.001	0.005	0.024	0.013	0.003	0.003	0	0.002
zn_shch3-3_P2	rCH	12	15	x	x	1.084	1.084	1.089	1.102	1.1	1.09	1.086	1.083	1.086	rCH	r												0	0.005	0.018	0.016	0.006	0.002	-0.001	0.002		0	0.005	0.018	0.016	0.006	0.002	0.001	0.002
zn_shch3-3_P2	aCSZn	12	2	1	x	111.2	108.6	111.2	112.3	115.3	115	110.6	111.3	110.8	aCSZn	a												-2.6	0	1.1	4.1	3.8	-0.6	0.1	-0.4		2.6	0	1.1	4.1	3.8	0.6	0.1	0.4
zn_shch3-3_P2	aSZnS	2	1	4	x	118.5	118.6	117.9	118.2	117.3	117.1	118.5	118.5	118.4	aSZnS	a												0.1	-0.6	-0.3	-1.2	-1.4	0	0	-0.1		0.1	0.6	0.3	1.2	1.4	0	0	0.1
zn_shch3-3_P2	aHSZn	7	2	1	x	98.6	98.9	99	106.9	108.2	107.3	98.6	98.8	98.6	aHSZn	a												0.3	0.4	8.3	9.6	8.7	0	0.2	0		0.3	0.4	8.3	9.6	8.7	0	0.2	0
zn_shch3-3_P2	aHSC	7	2	12	x	99.6	99.6	99.9	101.7	100.9	100.8	99.6	99.8	99.6	aHSC	a												0	0.3	2.1	1.3	1.2	0	0.2	0		0	0.3	2.1	1.3	1.2	0	0.2	0
zn_shch3-3_P2	aHCS	13	12	2	x	105.9	106.2	106	110.6	109.3	108.1	105.8	106.1	105.8	aHCS	a												0.3	0.1	4.7	3.4	2.2	-0.1	0.2	-0.1		0.3	0.1	4.7	3.4	2.2	0.1	0.2	0.1
zn_shch3-3_P2	aHCS	14	12	2	x	106.3	106.1	106.6	112.5	109.1	108.6	106.1	106.4	106.1	aHCS	a												-0.2	0.3	6.2	2.8	2.3	-0.2	0.1	-0.2		0.2	0.3	6.2	2.8	2.3	0.2	0.1	0.2
zn_shch3-3_P2	aHCS	15	12	2	x	111.4	111.2	111.6	117.5	111.6	111.1	111.2	111.6	111.2	aHCS	a												-0.2	0.2	6.1	0.2	-0.3	-0.2	0.2	-0.2		0.2	0.2	6.1	0.2	0.3	0.2	0.2	0.2
zn_shch3-4_P2	rZnS	1	2	x	x	2.442	2.365	2.44	2.303	2.395	2.433	2.435	2.429	2.436	rZnS	r												-0.077	-0.002	-0.139	-0.047	-0.009	-0.007	-0.013	-0.006		0.077	0.002	0.139	0.047	0.009	0.007	0.013	0.006
zn_shch3-4_P2	rHS	6	2	x	x	1.349	1.342	1.351	1.349	1.355	1.352	1.351	1.345	1.35	rHS	r												-0.007	0.002	0	0.006	0.003	0.002	-0.004	0.001		0.007	0.002	0	0.006	0.003	0.002	0.004	0.001
zn_shch3-4_P2	rCS	2	10	x	x	1.843	1.826	1.85	1.776	1.835	1.841	1.845	1.825	1.847	rCS	r												-0.017	0.007	-0.067	-0.008	-0.002	0.002	-0.018	0.004		0.017	0.007	0.067	0.008	0.002	0.002	0.018	0.004
zn_shch3-4_P2	rCH	11	10	x	x	1.086	1.086	1.091	1.115	1.099	1.089	1.088	1.086	1.088	rCH	r												0	0.005	0.029	0.013	0.003	0.002	0	0.002		0	0.005	0.029	0.013	0.003	0.002	0	0.002
zn_shch3-4_P2	rCH	12	10	x	x	1.086	1.087	1.09	1.107	1.098	1.088	1.089	1.086	1.088	rCH	r												0.001	0.004	0.021	0.012	0.002	0.003	0	0.002		0.001	0.004	0.021	0.012	0.002	0.003	0	0.002
zn_shch3-4_P2	rCH	13	10	x	x	1.084	1.084	1.089	1.1	1.099	1.089	1.086	1.083	1.086	rCH	r												0	0.005	0.016	0.015	0.005	0.002	-0.001	0.002		0	0.005	0.016	0.015	0.005	0.002	0.001	0.002
zn_shch3-4_P2	aCSZn	10	2	1	x	111.5	107.2	111.8	112.1	112.9	113.6	110.5	111.5	110.8	aCSZn	a												-4.3	0.3	0.6	1.4	2.1	-1	0	-0.7		4.3	0.3	0.6	1.4	2.1	1	0	0.7
zn_shch3-4_P2	aSZnS	2	1	3	x	105.7	103.9	105.2	105.8	106.2	106	105.4	105.7	105.5	aSZnS	a												-1.8	-0.5	0.1	0.5	0.3	-0.3	0	-0.2		1.8	0.5	0.1	0.5	0.3	0.3	0	0.2
zn_shch3-4_P2	aHSZn	6	2	1	x	100.4	101	101	107.7	108.2	108	100.4	100.5	100.4	aHSZn	a												0.6	0.6	7.3	7.8	7.6	0	0.1	0		0.6	0.6	7.3	7.8	7.6	0	0.1	0
zn_shch3-4_P2	aHSC	6	2	10	x	99.3	99.3	99.4	101.2	100.4	100.4	99.3	99.5	99.3	aHSC	a												0	0.1	1.9	1.1	1.1	0	0.2	0		0	0.1	1.9	1.1	1.1	0	0.2	0
zn_shch3-4_P2	aHCS	11	10	2	x	106.9	107.3	107	110.6	109.7	108.6	106.8	107	106.8	aHCS	a												0.4	0.1	3.7	2.8	1.7	-0.1	0.1	-0.1		0.4	0.1	3.7	2.8	1.7	0.1	0.1	0.1
zn_shch3-4_P2	aHCS	12	10	2	x	106.4	106.2	106.7	111.9	109.1	108.5	106.2	106.5	106.2	aHCS	a												-0.2	0.3	5.5	2.7	2.1	-0.2	0.1	-0.2		0.2	0.3	5.5	2.7	2.1	0.2	0.1	0.2
zn_shch3-4_P2	aHCS	13	10	2	x	111.4	111.2	111.6	116.7	111.5	111	111.3	111.6	111.3	aHCS	a												-0.2	0.2	5.3	0.1	-0.4	-0.1	0.2	-0.1		0.2	0.2	5.3	0.1	0.4	0.1	0.2	0.1
zn_s	rZnS	1	2	x	x	2.074	2.046	2.08	2.149	2.015	2.152	2.073	2.059	2.073	rZnS	r												-0.028	0.006	0.075	-0.059	0.078	-0.001	-0.015	-0.001		0.028	0.006	0.075	0.059	0.078	0.001	0.015	0.001

## Sheet: zn_geom_mix
Supporting Information for
Parameterization of DFTB3/3OB for Magnesium and Zinc for Chemical and Biological Applications
Xiya Lu, Michael Gaus, Marcus Elstner and Qiang Cui
													N = number of comparisons
Geometric properties													MAD = Mean absolute deviation
Calculated geometries (information based on xyz coordinates provided in the next sheet)													MAX = Maximal absolute deviation
(bond lengths “r” in Angstrom, angles “a” in degree)													MSE = Mean signed error
													Statistics with B3LYP/aug-cc-pVTZ being the reference							Differences to B3LYP/aug-cc-pVTZ					Absolute differences to B3LYP/aug-cc-pVTZ
						B3LYP	B3LYP	PM6	DFTB3/MIO	DFTB3/3OB					B3LYP	PM6	DFTB3/MIO	DFTB3/3OB		B3LYP	PM6	DFTB3/MIO	DFTB3/3OB		B3LYP	PM6	DFTB3/MIO	DFTB3/3OB
molecule	property	atoms involved				aug-cc-pVTZ	6-31+G(d,p)				property	type			6-31+G(d,p)					6-31+G(d,p)					6-31+G(d,p)
zn_h2o-2-dep_P1	rZnO	1	2	x	x	1.907	1.907	1.947	1.927	1.879	rZnO	r	N for bond lengths	161						0	0.04	0.02	-0.028		0	0.04	0.02	0.028
zn_h2o-2-dep_P1	rZnO	1	5	x	x	1.744	1.742	1.863	1.732	1.737	rZnO	r	MAD for bond lengths		0.00459006	0.117509	0.053	0.0193043		-0.002	0.119	-0.012	-0.007		0.002	0.119	0.012	0.007
zn_h2o-2-dep_P1	rHO	5	6	x	x	0.965	0.97	0.992	0.971	0.967	rHO	r	MAX for bond lengths		0.027	0.514	0.179	0.07		0.005	0.027	0.006	0.002		0.005	0.027	0.006	0.002
zn_h2o-2-dep_P1	rHO	2	3	x	x	0.969	0.973	0.972	0.973	0.968	rHO	r	MSE for bond lengths		0.00179503	-0.112118	-0.022	0.00325466		0.004	0.003	0.004	-0.001		0.004	0.003	0.004	0.001
zn_h2o-2-dep_P1	rHO	2	4	x	x	0.969	0.973	0.972	0.973	0.968	rHO	r								0.004	0.003	0.004	-0.001		0.004	0.003	0.004	0.001
zn_h2o-2-dep_P1	aOZnO	2	1	5	x	171.6	171.9	161.6	164.7	169	aOZnO	a	N for bond angles	231						0.3	-10	-6.9	-2.6		0.3	10	6.9	2.6
zn_h2o-2-dep_P1	aHOZn	6	5	1	x	117	117.4	114.4	131.6	127.1	aHOZn	a	MAD for bond angles		0.921645	6.70606	3	2.57835		0.4	-2.6	14.6	10.1		0.4	2.6	14.6	10.1
zn_h2o-2-dep_P1	aHOZn	3	2	1	x	125.3	125.2	125.1	124.3	124.4	aHOZn	a	MAX for bond angles		22.2	57.2	21.6	24.7		-0.1	-0.2	-1	-0.9		0.1	0.2	1	0.9
zn_h2o-2-dep_P1	aHOZn	4	2	1	x	125.3	125.2	125	124.4	124.4	aHOZn	a	MSE for bond angles		-0.087013	-0.434199	-0.115	-0.0181818		-0.1	-0.3	-0.9	-0.9		0.1	0.3	0.9	0.9
zn_h2o-2-dep_P1	aHOH	3	2	4	x	109.2	109.4	109.6	111.3	111.2	aHOH	a								0.2	0.4	2.1	2		0.2	0.4	2.1	2
zn_h2o-3-dep_P1	rZnO	1	2	x	x	1.991	1.984	1.981	2.052	1.958	rZnO	r	MAD of different bond types							-0.007	-0.01	0.061	-0.033		0.007	0.01	0.061	0.033
zn_h2o-3-dep_P1	rZnO	7	1	x	x	2.043	2.061	2.063	2.072	2.113	rZnO	r	rZnN	61	0.00232787	0.0604754	0.0434918	0.0191311		0.018	0.02	0.029	0.07		0.018	0.02	0.029	0.07
zn_h2o-3-dep_P1	rZnO	9	1	x	x	1.773	1.771	1.806	1.79	1.776	rZnO	r	rZnO	44	0.00804545	0.0687273	0.0477045	0.0143409		-0.002	0.033	0.017	0.003		0.002	0.033	0.017	0.003
zn_h2o-3-dep_P1	aOZnO	2	1	9	x	151.2	155.9	137.4	144	157	aOZnO	a	rZnP	9	0.009	0.457	0.121	0.0257778		4.7	-13.8	-7.2	5.8		4.7	13.8	7.2	5.8
zn_h2o-3-dep_P1	aOZnO	2	1	7	x	98	98.1	107.2	104.2	97.2	aOZnO	a	rZnS	44	0.00338636	0.183182	0.0692955	0.0244091		0.1	9.2	6.2	-0.8		0.1	9.2	6.2	0.8
zn_h2o-3-dep_P1	aOZnO	7	1	9	x	110.8	106	115.4	111.8	105.8	aOZnO	a								-4.8	4.6	1	-5		4.8	4.6	1	5
zn_h2o-4-dep_P1	rZnO	1	2	x	x	2.074	2.081	2.078	2.148	2.12	rZnO	r	MAX of different bond types							0.007	0.004	0.074	0.046		0.007	0.004	0.074	0.046
zn_h2o-4-dep_P1	rZnO	1	3	x	x	2.066	2.063	2.078	2.111	2.066	rZnO	r	rZnN	61	0.009	0.165	0.091	0.044		-0.003	0.012	0.045	0		0.003	0.012	0.045	0
zn_h2o-4-dep_P1	rZnO	1	4	x	x	2.096	2.11	2.078	2.145	2.125	rZnO	r	rZnO	44	0.019	0.247	0.147	0.07		0.014	-0.018	0.049	0.029		0.014	0.018	0.049	0.029
zn_h2o-4-dep_P1	rZnO	1	5	x	x	1.804	1.801	1.671	1.834	1.811	rZnO	r	rZnP	9	0.014	0.514	0.179	0.045		-0.003	-0.133	0.03	0.007		0.003	0.133	0.03	0.007
zn_h2o-4-dep_P1	aOZnO	2	1	3	x	94.3	92.7	102.2	99.9	95.9	aOZnO	a	rZnS	44	0.027	0.483	0.142	0.061		-1.6	7.9	5.6	1.6		1.6	7.9	5.6	1.6
zn_h2o-4-dep_P1	aOZnO	2	1	4	x	95.8	93.8	102.1	94.6	93	aOZnO	a								-2	6.3	-1.2	-2.8		2	6.3	1.2	2.8
zn_h2o-4-dep_P1	aOZnO	2	1	5	x	134.3	134.3	116.1	112.7	116.2	aOZnO	a	MSE of different bond types							0	-18.2	-21.6	-18.1		0	18.2	21.6	18.1
zn_h2o-4-dep_P1	aOZnO	3	1	4	x	103.9	105.8	102.2	104.3	102	aOZnO	a	rZnN	61	-0.000754098	-0.0579836	-0.0430984	0.013		1.9	-1.7	0.4	-1.9		1.9	1.7	0.4	1.9
zn_h2o-4-dep_P1	aOZnO	3	1	5	x	124.4	128.1	116	133.6	136.3	aOZnO	a	rZnO	44	0.00686364	-0.0539545	0.0404773	0.00106818		3.7	-8.4	9.2	11.9		3.7	8.4	9.2	11.9
zn_h2o-4-dep_P1	aOZnO	4	1	5	x	96.9	93.4	116.1	105	104.8	aOZnO	a	rZnP	9	0.00833333	-0.457	0.098	0.0257778		-3.5	19.2	8.1	7.9		3.5	19.2	8.1	7.9
zn_nh3-2-dep_P1	rZnN	1	2	x	x	1.972	1.975	1.956	1.917	1.96	rZnN	r	rZnS	44	-0.00125	-0.183182	-0.0688864	-0.0124545		0.003	-0.016	-0.055	-0.012		0.003	0.016	0.055	0.012
zn_nh3-2-dep_P1	rZnN	8	1	x	x	1.795	1.795	1.815	1.746	1.764	rZnN	r								0	0.02	-0.049	-0.031		0	0.02	0.049	0.031
zn_nh3-2-dep_P1	aNZnN	2	1	8	x	171.1	170.4	160.9	180	179.9	aNZnN	a								-0.7	-10.2	8.9	8.8		0.7	10.2	8.9	8.8
zn_nh3-3-dep_P1	rZnN	1	2	x	x	2.075	2.076	1.96	2.027	2.094	rZnN	r								0.001	-0.115	-0.048	0.019		0.001	0.115	0.048	0.019
zn_nh3-3-dep_P1	rZnN	1	9	x	x	2.073	2.074	1.96	2.027	2.094	rZnN	r								0.001	-0.113	-0.046	0.021		0.001	0.113	0.046	0.021
zn_nh3-3-dep_P1	rZnN	1	12	x	x	1.814	1.813	1.717	1.79	1.808	rZnN	r								-0.001	-0.097	-0.024	-0.006		0.001	0.097	0.024	0.006
zn_nh3-3-dep_P1	aNZnN	2	1	9	x	109.7	109.6	115.5	112.6	106.9	aNZnN	a								-0.1	5.8	2.9	-2.8		0.1	5.8	2.9	2.8
zn_nh3-3-dep_P1	aNZnN	2	1	12	x	124.9	124.9	122	123.7	126.4	aNZnN	a								0	-2.9	-1.2	1.5		0	2.9	1.2	1.5
zn_nh3-3-dep_P1	aNZnN	9	1	12	x	125.4	125.4	122.2	123.7	126.6	aNZnN	a								0	-3.2	-1.7	1.2		0	3.2	1.7	1.2
zn_nh3-4-dep_P1	rZnN	1	2	x	x	2.149	2.147	2.067	2.157	2.193	rZnN	r								-0.002	-0.082	0.008	0.044		0.002	0.082	0.008	0.044
zn_nh3-4-dep_P1	rZnN	1	3	x	x	2.15	2.15	2.04	2.074	2.145	rZnN	r								0	-0.11	-0.076	-0.005		0	0.11	0.076	0.005
zn_nh3-4-dep_P1	rZnN	1	4	x	x	1.876	1.876	1.887	1.85	1.874	rZnN	r								0	0.011	-0.026	-0.002		0	0.011	0.026	0.002
zn_nh3-4-dep_P1	rZnN	1	5	x	x	2.148	2.149	2.039	2.072	2.142	rZnN	r								0.001	-0.109	-0.076	-0.006		0.001	0.109	0.076	0.006
zn_nh3-4-dep_P1	aNZnN	2	1	3	x	104.3	104.5	107.6	103.1	101.9	aNZnN	a								0.2	3.3	-1.2	-2.4		0.2	3.3	1.2	2.4
zn_nh3-4-dep_P1	aNZnN	2	1	4	x	126	126.6	119.3	109.6	117.7	aNZnN	a								0.6	-6.7	-16.4	-8.3		0.6	6.7	16.4	8.3
zn_nh3-4-dep_P1	aNZnN	2	1	5	x	104.2	104.3	107.7	103.3	102.4	aNZnN	a								0.1	3.5	-0.9	-1.8		0.1	3.5	0.9	1.8
zn_nh3-4-dep_P1	aNZnN	3	1	4	x	107.2	106.8	107	114.3	113.6	aNZnN	a								-0.4	-0.2	7.1	6.4		0.4	0.2	7.1	6.4
zn_nh3-4-dep_P1	aNZnN	3	1	5	x	105.7	105.4	107.2	110.9	105.4	aNZnN	a								-0.3	1.5	5.2	-0.3		0.3	1.5	5.2	0.3
zn_nh3-4-dep_P1	aNZnN	4	1	5	x	107.8	107.5	107.4	114.4	114.2	aNZnN	a								-0.3	-0.4	6.6	6.4		0.3	0.4	6.6	6.4
zn_sh2-2-dep_P1	rZnS	2	1	x	x	2.143	2.146	2.116	2.11	2.172	rZnS	r								0.003	-0.027	-0.033	0.029		0.003	0.027	0.033	0.029
zn_sh2-2-dep_P1	rZnS	3	1	x	x	2.355	2.36	2.211	2.279	2.335	rZnS	r								0.005	-0.144	-0.076	-0.02		0.005	0.144	0.076	0.02
zn_sh2-2-dep_P1	aSZnS	2	1	3	x	178	177.2	176.4	169.5	173.5	aSZnS	a								-0.8	-1.6	-8.5	-4.5		0.8	1.6	8.5	4.5
zn_sh2-3-dep_P1	rZnS	1	2	x	x	2.173	2.174	2.117	2.156	2.185	rZnS	r								0.001	-0.056	-0.017	0.012		0.001	0.056	0.017	0.012
zn_sh2-3-dep_P1	rZnS	1	3	x	x	2.459	2.46	2.263	2.376	2.453	rZnS	r								0.001	-0.196	-0.083	-0.006		0.001	0.196	0.083	0.006
zn_sh2-3-dep_P1	rZnS	1	4	x	x	2.474	2.478	2.268	2.373	2.457	rZnS	r								0.004	-0.206	-0.101	-0.017		0.004	0.206	0.101	0.017
zn_sh2-3-dep_P1	aSZnS	2	1	3	x	134.3	135.1	129.9	133.8	136.1	aSZnS	a								0.8	-4.4	-0.5	1.8		0.8	4.4	0.5	1.8
zn_sh2-3-dep_P1	aSZnS	2	1	4	x	122.4	122.2	118.7	119.7	121.6	aSZnS	a								-0.2	-3.7	-2.7	-0.8		0.2	3.7	2.7	0.8
zn_sh2-3-dep_P1	aSZnS	3	1	4	x	103.4	102.6	111.4	106.6	102.4	aSZnS	a								-0.8	8	3.2	-1		0.8	8	3.2	1
zn_sh2-4-dep_P1	rZnS	1	2	x	x	2.553	2.549	2.344	2.454	2.529	rZnS	r								-0.004	-0.209	-0.099	-0.024		0.004	0.209	0.099	0.024
zn_sh2-4-dep_P1	rZnS	1	3	x	x	2.553	2.547	2.349	2.46	2.532	rZnS	r								-0.006	-0.204	-0.093	-0.021		0.006	0.204	0.093	0.021
zn_sh2-4-dep_P1	rZnS	1	4	x	x	2.214	2.213	2.202	2.206	2.209	rZnS	r								-0.001	-0.012	-0.008	-0.005		0.001	0.012	0.008	0.005
zn_sh2-4-dep_P1	rZnS	1	5	x	x	2.538	2.538	2.343	2.424	2.509	rZnS	r								0	-0.195	-0.114	-0.029		0	0.195	0.114	0.029
zn_sh2-4-dep_P1	aSZnS	2	1	3	x	99.7	99.4	107.4	100	98.1	aSZnS	a								-0.3	7.7	0.3	-1.6		0.3	7.7	0.3	1.6
zn_sh2-4-dep_P1	aSZnS	2	1	4	x	117.4	118.4	114.1	119.8	121.5	aSZnS	a								1	-3.3	2.4	4.1		1	3.3	2.4	4.1
zn_sh2-4-dep_P1	aSZnS	2	1	5	x	103.3	102.9	107.3	102.8	100.5	aSZnS	a								-0.4	4	-0.5	-2.8		0.4	4	0.5	2.8
zn_sh2-4-dep_P1	aSZnS	3	1	4	x	120.4	120.5	113	119.4	121.2	aSZnS	a								0.1	-7.4	-1	0.8		0.1	7.4	1	0.8
zn_sh2-4-dep_P1	aSZnS	3	1	5	x	100.2	100.8	106.8	102.1	99.7	aSZnS	a								0.6	6.6	1.9	-0.5		0.6	6.6	1.9	0.5
zn_sh2-4-dep_P1	aSZnS	4	1	5	x	113.1	112	107.8	110.2	112	aSZnS	a								-1.1	-5.3	-2.9	-1.1		1.1	5.3	2.9	1.1
zn_ph3-2-dep_P1	rZnP	1	2	x	x	2.282	2.284	1.786	-	2.321	rZnP	r								0.002	-0.496	#VALUE!	0.039		0.002	0.496	#VALUE!	0.039
zn_ph3-2-dep_P1	rZnP	2	6	x	x	2.445	2.458	2.001	-	2.47	rZnP	r								0.013	-0.444	#VALUE!	0.025		0.013	0.444	#VALUE!	0.025
zn_ph3-2-dep_P1	aPZnP	1	2	6	x	175.4	175.1	179.7	-	171.3	aPZnP	a								-0.3	4.3	#VALUE!	-4.1		0.3	4.3	#VALUE!	4.1
zn_ph3-3-dep_P1	rZnP	2	1	x	x	2.297	2.297	1.783	-	2.342	rZnP	r								0	-0.514	#VALUE!	0.045		0	0.514	#VALUE!	0.045
zn_ph3-3-dep_P1	rZnP	2	6	x	x	2.516	2.525	2.016	-	2.53	rZnP	r								0.009	-0.5	#VALUE!	0.014		0.009	0.5	#VALUE!	0.014
zn_ph3-3-dep_P1	rZnP	2	10	x	x	2.511	2.525	2.016	-	2.53	rZnP	r								0.014	-0.495	#VALUE!	0.019		0.014	0.495	#VALUE!	0.019
zn_ph3-3-dep_P1	aPZnP	1	2	6	x	125.9	126.3	121	-	127	aPZnP	a								0.4	-4.9	#VALUE!	1.1		0.4	4.9	#VALUE!	1.1
zn_ph3-3-dep_P1	aPZnP	1	2	10	x	127.2	126.3	121	-	127.3	aPZnP	a								-0.9	-6.2	#VALUE!	0.1		0.9	6.2	#VALUE!	0.1
zn_ph3-3-dep_P1	aPZnP	6	2	10	x	106.5	107.1	118.1	-	104.8	aPZnP	a								0.6	11.6	#VALUE!	-1.7		0.6	11.6	#VALUE!	1.7
zn_ph3-4-dep_P1	rZnP	1	2	x	x	2.544	2.556	2.049	2.723	2.57	rZnP	r								0.012	-0.495	0.179	0.026		0.012	0.495	0.179	0.026
zn_ph3-4-dep_P1	rZnP	1	3	x	x	2.54	2.554	2.052	2.669	2.555	rZnP	r								0.014	-0.488	0.129	0.015		0.014	0.488	0.129	0.015
zn_ph3-4-dep_P1	rZnP	1	4	x	x	2.336	2.333	2.142	2.289	2.37	rZnP	r								-0.003	-0.194	-0.047	0.034		0.003	0.194	0.047	0.034
zn_ph3-4-dep_P1	rZnP	1	5	x	x	2.54	2.554	2.053	2.669	2.555	rZnP	r								0.014	-0.487	0.129	0.015		0.014	0.487	0.129	0.015
zn_ph3-4-dep_P1	aPZnP	2	1	3	x	103.6	103.5	111.5	99.4	101.5	aPZnP	a								-0.1	7.9	-4.2	-2.1		0.1	7.9	4.2	2.1
zn_ph3-4-dep_P1	aPZnP	2	1	4	x	118	118.4	110.7	122.5	119.3	aPZnP	a								0.4	-7.3	4.5	1.3		0.4	7.3	4.5	1.3
zn_ph3-4-dep_P1	aPZnP	2	1	5	x	103.6	103.5	111.5	99.3	101.5	aPZnP	a								-0.1	7.9	-4.3	-2.1		0.1	7.9	4.3	2.1
zn_ph3-4-dep_P1	aPZnP	3	1	4	x	113.4	113.4	106.1	116	115.3	aPZnP	a								0	-7.3	2.6	1.9		0	7.3	2.6	1.9
zn_ph3-4-dep_P1	aPZnP	3	1	5	x	103.4	103.1	110.7	99.7	101.4	aPZnP	a								-0.3	7.3	-3.7	-2		0.3	7.3	3.7	2
zn_ph3-4-dep_P1	aPZnP	4	1	5	x	113.2	113.3	106	116	115.3	aPZnP	a								0.1	-7.2	2.8	2.1		0.1	7.2	2.8	2.1
zn_nhch2-2-dep_P1	rZnN	1	2	x	x	1.817	1.82	1.742	1.739	1.779	rZnN	r								0.003	-0.075	-0.078	-0.038		0.003	0.075	0.078	0.038
zn_nhch2-2-dep_P1	rZnN	1	6	x	x	1.96	1.964	1.854	1.894	1.947	rZnN	r								0.004	-0.106	-0.066	-0.013		0.004	0.106	0.066	0.013
zn_nhch2-2-dep_P1	aNZnN	2	1	6	x	160.3	160	161.8	158.7	161.2	aNZnN	a								-0.3	1.5	-1.6	0.9		0.3	1.5	1.6	0.9
zn_nhch2-3-dep_P1	rZnN	1	2	x	x	1.838	1.845	1.703	1.778	1.83	rZnN	r								0.007	-0.135	-0.06	-0.008		0.007	0.135	0.06	0.008
zn_nhch2-3-dep_P1	rZnN	1	6	x	x	2.046	2.055	1.881	1.963	2.056	rZnN	r								0.009	-0.165	-0.083	0.01		0.009	0.165	0.083	0.01
zn_nhch2-3-dep_P1	rZnN	1	11	x	x	2.028	2.03	1.881	1.962	2.047	rZnN	r								0.002	-0.147	-0.066	0.019		0.002	0.147	0.066	0.019
zn_nhch2-3-dep_P1	aNZnN	2	1	6	x	114.4	110.9	122.1	121.1	121.3	aNZnN	a								-3.5	7.7	6.7	6.9		3.5	7.7	6.7	6.9
zn_nhch2-3-dep_P1	aNZnN	2	1	11	x	129.4	133.1	122.2	120.4	125.2	aNZnN	a								3.7	-7.2	-9	-4.2		3.7	7.2	9	4.2
zn_nhch2-3-dep_P1	aNZnN	6	1	11	x	111.3	110.7	114.1	116.7	108.2	aNZnN	a								-0.6	2.8	5.4	-3.1		0.6	2.8	5.4	3.1
zn_nhch2-4-dep_P1	rZnN	1	2	x	x	2.096	2.096	1.939	2.011	2.07	rZnN	r								0	-0.157	-0.085	-0.026		0	0.157	0.085	0.026
zn_nhch2-4-dep_P1	rZnN	1	7	x	x	1.899	1.899	1.838	1.903	1.94	rZnN	r								0	-0.061	0.004	0.041		0	0.061	0.004	0.041
zn_nhch2-4-dep_P1	rZnN	1	11	x	x	2.102	2.105	1.941	2.07	2.088	rZnN	r								0.003	-0.161	-0.032	-0.014		0.003	0.161	0.032	0.014
zn_nhch2-4-dep_P1	rZnN	1	16	x	x	2.098	2.101	1.954	2.007	2.078	rZnN	r								0.003	-0.144	-0.091	-0.02		0.003	0.144	0.091	0.02
zn_nhch2-4-dep_P1	aNZnN	2	1	7	x	126.6	127.5	110.9	117.7	101.9	aNZnN	a								0.9	-15.7	-8.9	-24.7		0.9	15.7	8.9	24.7
zn_nhch2-4-dep_P1	aNZnN	2	1	11	x	105.5	104.9	107.4	105.7	109.5	aNZnN	a								-0.6	1.9	0.2	4		0.6	1.9	0.2	4
zn_nhch2-4-dep_P1	aNZnN	2	1	16	x	106.4	106.6	109.9	114.7	112.1	aNZnN	a								0.2	3.5	8.3	5.7		0.2	3.5	8.3	5.7
zn_nhch2-4-dep_P1	aNZnN	7	1	11	x	102.2	101.6	105.6	94	112.3	aNZnN	a								-0.6	3.4	-8.2	10.1		0.6	3.4	8.2	10.1
zn_nhch2-4-dep_P1	aNZnN	7	1	16	x	108.7	108.8	115.4	114.9	115.3	aNZnN	a								0.1	6.7	6.2	6.6		0.1	6.7	6.2	6.6
zn_nhch2-4-dep_P1	aNZnN	11	1	16	x	105.5	105.4	107.3	106.3	105.8	aNZnN	a								-0.1	1.8	0.8	0.3		0.1	1.8	0.8	0.3
zn_shch3-2-dep_P1	rZnS	1	2	x	x	2.144	2.148	2.107	2.123	2.176	rZnS	r								0.004	-0.037	-0.021	0.032		0.004	0.037	0.021	0.032
zn_shch3-2-dep_P1	rZnS	1	3	x	x	2.336	2.344	2.195	2.295	2.345	rZnS	r								0.008	-0.141	-0.041	0.009		0.008	0.141	0.041	0.009
zn_shch3-2-dep_P1	aSZnS	2	1	3	x	175.4	174.6	176.9	169.1	174	aSZnS	a								-0.8	1.5	-6.3	-1.4		0.8	1.5	6.3	1.4
zn_shch3-3-dep_P1	rZnS	1	2	x	x	2.44	2.444	2.239	2.39	2.458	rZnS	r								0.004	-0.201	-0.05	0.018		0.004	0.201	0.05	0.018
zn_shch3-3-dep_P1	rZnS	1	3	x	x	2.175	2.177	2.1	2.173	2.192	rZnS	r								0.002	-0.075	-0.002	0.017		0.002	0.075	0.002	0.017
zn_shch3-3-dep_P1	rZnS	1	4	x	x	2.427	2.432	2.237	2.384	2.455	rZnS	r								0.005	-0.19	-0.043	0.028		0.005	0.19	0.043	0.028
zn_shch3-3-dep_P1	aSZnS	2	1	3	x	118.2	118.4	118.6	114.5	120.1	aSZnS	a								0.2	0.4	-3.7	1.9		0.2	0.4	3.7	1.9
zn_shch3-3-dep_P1	aSZnS	2	1	4	x	105	104.3	112.3	108.8	103.9	aSZnS	a								-0.7	7.3	3.8	-1.1		0.7	7.3	3.8	1.1
zn_shch3-3-dep_P1	aSZnS	3	1	4	x	136.8	137.2	129.2	136.7	136	aSZnS	a								0.4	-7.6	-0.1	-0.8		0.4	7.6	0.1	0.8
zn_shch3-4-dep_P1	rZnS	2	1	x	x	2.507	2.504	2.335	2.459	2.526	rZnS	r								-0.003	-0.172	-0.048	0.019		0.003	0.172	0.048	0.019
zn_shch3-4-dep_P1	rZnS	3	1	x	x	2.226	2.225	2.202	2.235	2.231	rZnS	r								-0.001	-0.024	0.009	0.005		0.001	0.024	0.009	0.005
zn_shch3-4-dep_P1	rZnS	4	1	x	x	2.501	2.504	2.337	2.431	2.504	rZnS	r								0.003	-0.164	-0.07	0.003		0.003	0.164	0.07	0.003
zn_shch3-4-dep_P1	rZnS	5	1	x	x	2.517	2.517	2.334	2.456	2.524	rZnS	r								0	-0.183	-0.061	0.007		0	0.183	0.061	0.007
zn_shch3-4-dep_P1	aSZnS	2	1	3	x	118.5	118.8	113.9	115.6	118.6	aSZnS	a								0.3	-4.6	-2.9	0.1		0.3	4.6	2.9	0.1
zn_shch3-4-dep_P1	aSZnS	2	1	4	x	104.2	103.5	106.7	104.7	102.1	aSZnS	a								-0.7	2.5	0.5	-2.1		0.7	2.5	0.5	2.1
zn_shch3-4-dep_P1	aSZnS	2	1	5	x	98.7	99	106.5	103.8	100.2	aSZnS	a								0.3	7.8	5.1	1.5		0.3	7.8	5.1	1.5
zn_shch3-4-dep_P1	aSZnS	3	1	4	x	109.2	109.5	107.5	109.4	111.7	aSZnS	a								0.3	-1.7	0.2	2.5		0.3	1.7	0.2	2.5
zn_shch3-4-dep_P1	aSZnS	3	1	5	x	119.5	119.2	115.6	116.4	119.3	aSZnS	a								-0.3	-3.9	-3.1	-0.2		0.3	3.9	3.1	0.2
zn_shch3-4-dep_P1	aSZnS	4	1	5	x	104.9	104.9	106	105.9	102.5	aSZnS	a								0	1.1	1	-2.4		0	1.1	1	2.4
zn_nh3-3_h2o-1_P2	rZnN	1	2	x	x	2.065	2.064	2.051	2.029	2.076	rZnN	r								-0.001	-0.014	-0.036	0.011		0.001	0.014	0.036	0.011
zn_nh3-3_h2o-1_P2	rZnN	1	3	x	x	2.065	2.064	2.051	2.029	2.076	rZnN	r								-0.001	-0.014	-0.036	0.011		0.001	0.014	0.036	0.011
zn_nh3-3_h2o-1_P2	rZnN	1	4	x	x	2.067	2.067	2.051	2.026	2.074	rZnN	r								0	-0.016	-0.041	0.007		0	0.016	0.041	0.007
zn_nh3-3_h2o-1_P2	rZnO	1	14	x	x	2.086	2.1	2.023	2.107	2.06	rZnO	r								0.014	-0.063	0.021	-0.026		0.014	0.063	0.021	0.026
zn_nh3-3_h2o-1_P2	aNZnN	2	1	3	x	114.9	115.3	115	114.7	114.1	aNZnN	a								0.4	0.1	-0.2	-0.8		0.4	0.1	0.2	0.8
zn_nh3-3_h2o-1_P2	aNZnN	2	1	4	x	113.8	114	114	114.1	113.4	aNZnN	a								0.2	0.2	0.3	-0.4		0.2	0.2	0.3	0.4
zn_nh3-3_h2o-1_P2	aNZnN	3	1	4	x	113.6	113.9	113.9	114	113.3	aNZnN	a								0.3	0.3	0.4	-0.3		0.3	0.3	0.4	0.3
zn_nh3-3_h2o-1_P2	aNZnO	2	1	14	x	104.5	104	103.6	103.7	104.6	aNZnO	a								-0.5	-0.9	-0.8	0.1		0.5	0.9	0.8	0.1
zn_nh3-3_h2o-1_P2	aNZnO	3	1	14	x	104.1	103.9	103.6	103.8	104.7	aNZnO	a								-0.2	-0.5	-0.3	0.6		0.2	0.5	0.3	0.6
zn_nh3-3_h2o-1_P2	aNZnO	4	1	14	x	104.4	104	104.9	104.9	105.7	aNZnO	a								-0.4	0.5	0.5	1.3		0.4	0.5	0.5	1.3
zn_nh3-3_oh-1_P1	rZnN	1	2	x	x	2.121	2.122	2.003	2.059	2.138	rZnN	r								0.001	-0.118	-0.062	0.017		0.001	0.118	0.062	0.017
zn_nh3-3_oh-1_P1	rZnN	1	3	x	x	2.118	2.116	2.001	2.075	2.155	rZnN	r								-0.002	-0.117	-0.043	0.037		0.002	0.117	0.043	0.037
zn_nh3-3_oh-1_P1	rZnN	1	4	x	x	2.119	2.117	2.001	2.077	2.156	rZnN	r								-0.002	-0.118	-0.042	0.037		0.002	0.118	0.042	0.037
zn_nh3-3_oh-1_P1	rZnO	1	15	x	x	1.842	1.842	1.622	1.895	1.835	rZnO	r								0	-0.22	0.053	-0.007		0	0.22	0.053	0.007
zn_nh3-3_oh-1_P1	aNZnN	2	1	3	x	110.3	110.5	112.2	111.7	107	aNZnN	a								0.2	1.9	1.4	-3.3		0.2	1.9	1.4	3.3
zn_nh3-3_oh-1_P1	aNZnN	2	1	4	x	110.3	110.4	112.2	111.3	106.9	aNZnN	a								0.1	1.9	1	-3.4		0.1	1.9	1	3.4
zn_nh3-3_oh-1_P1	aNZnN	3	1	4	x	108.9	109.1	112.1	113.4	107.1	aNZnN	a								0.2	3.2	4.5	-1.8		0.2	3.2	4.5	1.8
zn_nh3-3_oh-1_P1	aNZnO	2	1	15	x	92.1	90.6	105.8	96.2	101.4	aNZnO	a								-1.5	13.7	4.1	9.3		1.5	13.7	4.1	9.3
zn_nh3-3_oh-1_P1	aNZnO	3	1	15	x	117.2	117.5	107	112.1	117	aNZnO	a								0.3	-10.2	-5.1	-0.2		0.3	10.2	5.1	0.2
zn_nh3-3_oh-1_P1	aNZnO	4	1	15	x	116.8	117.2	107	111	116.5	aNZnO	a								0.4	-9.8	-5.8	-0.3		0.4	9.8	5.8	0.3
zn_nh3-1_h2o-2_sh2-1_P2	rZnN	1	13	x	x	2.041	2.039	2.041	2.015	2.062	rZnN	r								-0.002	0	-0.026	0.021		0.002	0	0.026	0.021
zn_nh3-1_h2o-2_sh2-1_P2	rZnO	1	11	x	x	2.044	2.054	2.02	2.085	2.038	rZnO	r								0.01	-0.024	0.041	-0.006		0.01	0.024	0.041	0.006
zn_nh3-1_h2o-2_sh2-1_P2	rZnO	1	12	x	x	2.047	2.057	2.01	2.083	2.04	rZnO	r								0.01	-0.037	0.036	-0.007		0.01	0.037	0.036	0.007
zn_nh3-1_h2o-2_sh2-1_P2	rZnS	1	2	x	x	2.42	2.415	2.235	2.329	2.383	rZnS	r								-0.005	-0.185	-0.091	-0.037		0.005	0.185	0.091	0.037
zn_nh3-1_h2o-2_sh2-1_P2	aNZnO	13	1	11	x	109.1	109.3	105	110.1	110.6	aNZnO	a								0.2	-4.1	1	1.5		0.2	4.1	1	1.5
zn_nh3-1_h2o-2_sh2-1_P2	aNZnO	13	1	12	x	109.8	110.1	102.1	107.9	108.5	aNZnO	a								0.3	-7.7	-1.9	-1.3		0.3	7.7	1.9	1.3
zn_nh3-1_h2o-2_sh2-1_P2	aNZnS	13	1	2	x	123.7	124.6	131.9	120.9	120	aNZnS	a								0.9	8.2	-2.8	-3.7		0.9	8.2	2.8	3.7
zn_nh3-1_h2o-2_sh2-1_P2	aOZnO	11	1	12	x	98.5	98.1	99.4	99.9	101.1	aOZnO	a								-0.4	0.9	1.4	2.6		0.4	0.9	1.4	2.6
zn_nh3-1_h2o-2_sh2-1_P2	aOZnS	11	1	2	x	109.1	108.7	107.4	111.3	110.6	aOZnS	a								-0.4	-1.7	2.2	1.5		0.4	1.7	2.2	1.5
zn_nh3-1_h2o-2_sh2-1_P2	aOZnS	12	1	2	x	103.7	102.7	106.5	104.4	104.1	aOZnS	a								-1	2.8	0.7	0.4		1	2.8	0.7	0.4
zn_nh3-1_h2o-1_oh-1_sh2-1_P1	rZnN	1	12	x	x	2.059	2.054	1.97	2.025	2.084	rZnN	r								-0.005	-0.089	-0.034	0.025		0.005	0.089	0.034	0.025
zn_nh3-1_h2o-1_oh-1_sh2-1_P1	rZnO	1	10	x	x	1.825	1.826	1.581	1.861	1.817	rZnO	r								0.001	-0.244	0.036	-0.008		0.001	0.244	0.036	0.008
zn_nh3-1_h2o-1_oh-1_sh2-1_P1	rZnO	1	11	x	x	2.133	2.146	2.079	2.192	2.147	rZnO	r								0.013	-0.054	0.059	0.014		0.013	0.054	0.059	0.014
zn_nh3-1_h2o-1_oh-1_sh2-1_P1	rZnS	1	2	x	x	2.515	2.512	2.081	2.405	2.553	rZnS	r								-0.003	-0.434	-0.11	0.038		0.003	0.434	0.11	0.038
zn_nh3-1_h2o-1_oh-1_sh2-1_P1	aNZnO	12	1	10	x	135.1	137.3	104	134	140.2	aNZnO	a								2.2	-31.1	-1.1	5.1		2.2	31.1	1.1	5.1
zn_nh3-1_h2o-1_oh-1_sh2-1_P1	aNZnO	12	1	11	x	102.7	101.7	93	102.3	100.1	aNZnO	a								-1	-9.7	-0.4	-2.6		1	9.7	0.4	2.6
zn_nh3-1_h2o-1_oh-1_sh2-1_P1	aNZnS	12	1	2	x	110.8	111.5	126.3	119.9	107.5	aNZnS	a								0.7	15.5	9.1	-3.3		0.7	15.5	9.1	3.3
zn_nh3-1_h2o-1_oh-1_sh2-1_P1	aOZnO	10	1	11	x	85.8	84.6	90.1	96.9	97.6	aOZnO	a								-1.2	4.3	11.1	11.8		1.2	4.3	11.1	11.8
zn_nh3-1_h2o-1_oh-1_sh2-1_P1	aOZnS	10	1	2	x	109.9	107.7	124.7	98.1	105.6	aOZnS	a								-2.2	14.8	-11.8	-4.3		2.2	14.8	11.8	4.3
zn_nh3-1_h2o-1_oh-1_sh2-1_P1	aOZnS	11	1	2	x	103.1	103.7	106.8	97.5	96.2	aOZnS	a								0.6	3.7	-5.6	-6.9		0.6	3.7	5.6	6.9
zn_nh3-1_h2o-2_sh-1_P1	rZnN	1	12	x	x	2.076	2.071	2.046	2.034	2.103	rZnN	r								-0.005	-0.03	-0.042	0.027		0.005	0.03	0.042	0.027
zn_nh3-1_h2o-2_sh-1_P1	rZnO	1	10	x	x	2.136	2.143	2.078	2.194	2.147	rZnO	r								0.007	-0.058	0.058	0.011		0.007	0.058	0.058	0.011
zn_nh3-1_h2o-2_sh-1_P1	rZnO	1	11	x	x	2.167	2.184	2.059	2.194	2.158	rZnO	r								0.017	-0.108	0.027	-0.009		0.017	0.108	0.027	0.009
zn_nh3-1_h2o-2_sh-1_P1	rZnS	1	2	x	x	2.202	2.202	2.182	2.186	2.203	rZnS	r								0	-0.02	-0.016	0.001		0	0.02	0.016	0.001
zn_nh3-1_h2o-2_sh-1_P1	aNZnO	12	1	10	x	97.5	96.7	96.2	99.1	98.3	aNZnO	a								-0.8	-1.3	1.6	0.8		0.8	1.3	1.6	0.8
zn_nh3-1_h2o-2_sh-1_P1	aNZnO	12	1	11	x	103.5	104.3	104.8	105.7	103.3	aNZnO	a								0.8	1.3	2.2	-0.2		0.8	1.3	2.2	0.2
zn_nh3-1_h2o-2_sh-1_P1	aNZnS	12	1	2	x	128.1	130	131.9	124.1	124.6	aNZnS	a								1.9	3.8	-4	-3.5		1.9	3.8	4	3.5
zn_nh3-1_h2o-2_sh-1_P1	aOZnO	10	1	11	x	90.2	87.7	97.6	91.1	91.6	aOZnO	a								-2.5	7.4	0.9	1.4		2.5	7.4	0.9	1.4
zn_nh3-1_h2o-2_sh-1_P1	aOZnS	10	1	2	x	121.4	122.5	117.8	116.2	118.5	aOZnS	a								1.1	-3.6	-5.2	-2.9		1.1	3.6	5.2	2.9
zn_nh3-1_h2o-2_sh-1_P1	aOZnS	11	1	2	x	108.8	106.8	103.3	114.9	114.5	aOZnS	a								-2	-5.5	6.1	5.7		2	5.5	6.1	5.7
zn_nh3-2_h2o-2_P2	rZnN	1	2	x	x	2.043	2.042	2.047	2.011	2.061	rZnN	r								-0.001	0.004	-0.032	0.018		0.001	0.004	0.032	0.018
zn_nh3-2_h2o-2_P2	rZnN	1	3	x	x	2.043	2.042	2.047	2.011	2.061	rZnN	r								-0.001	0.004	-0.032	0.018		0.001	0.004	0.032	0.018
zn_nh3-2_h2o-2_P2	rZnO	1	14	x	x	2.051	2.061	2.019	2.082	2.039	rZnO	r								0.01	-0.032	0.031	-0.012		0.01	0.032	0.031	0.012
zn_nh3-2_h2o-2_P2	rZnO	1	15	x	x	2.051	2.061	2.019	2.082	2.039	rZnO	r								0.01	-0.032	0.031	-0.012		0.01	0.032	0.031	0.012
zn_nh3-2_h2o-2_P2	aNZnN	2	1	3	x	121.2	121.9	123.3	121.1	119.4	aNZnN	a								0.7	2.1	-0.1	-1.8		0.7	2.1	0.1	1.8
zn_nh3-2_h2o-2_P2	aNZnO	2	1	14	x	108.4	108.3	108.6	109.2	109.4	aNZnO	a								-0.1	0.2	0.8	1		0.1	0.2	0.8	1
zn_nh3-2_h2o-2_P2	aNZnO	2	1	15	x	109	108.8	106.5	107.8	108.1	aNZnO	a								-0.2	-2.5	-1.2	-0.9		0.2	2.5	1.2	0.9
zn_nh3-2_h2o-2_P2	aNZnO	3	1	14	x	109	108.8	106.5	107.8	108.1	aNZnO	a								-0.2	-2.5	-1.2	-0.9		0.2	2.5	1.2	0.9
zn_nh3-2_h2o-2_P2	aNZnO	3	1	15	x	108.4	108.3	108.6	109.2	109.4	aNZnO	a								-0.1	0.2	0.8	1		0.1	0.2	0.8	1
zn_nh3-2_h2o-2_P2	aOZnO	14	1	15	x	98.5	98.2	101.2	99.8	100.8	aOZnO	a								-0.3	2.7	1.3	2.3		0.3	2.7	1.3	2.3
zn_nh3-2_h2o-1_oh-1_P1	rZnN	1	2	x	x	2.089	2.085	1.982	2.048	2.129	rZnN	r								-0.004	-0.107	-0.041	0.04		0.004	0.107	0.041	0.04
zn_nh3-2_h2o-1_oh-1_P1	rZnN	1	3	x	x	2.073	2.071	1.984	2.038	2.112	rZnN	r								-0.002	-0.089	-0.035	0.039		0.002	0.089	0.035	0.039
zn_nh3-2_h2o-1_oh-1_P1	rZnO	1	13	x	x	1.836	1.835	1.623	1.867	1.829	rZnO	r								-0.001	-0.213	0.031	-0.007		0.001	0.213	0.031	0.007
zn_nh3-2_h2o-1_oh-1_P1	rZnO	1	14	x	x	2.159	2.172	2.104	2.217	2.167	rZnO	r								0.013	-0.055	0.058	0.008		0.013	0.055	0.058	0.008
zn_nh3-2_h2o-1_oh-1_P1	aNZnN	2	1	3	x	114.5	114.9	118.6	118	110.2	aNZnN	a								0.4	4.1	3.5	-4.3		0.4	4.1	3.5	4.3
zn_nh3-2_h2o-1_oh-1_P1	aNZnO	2	1	13	x	110.8	110.3	116.5	107.4	114.5	aNZnO	a								-0.5	5.7	-3.4	3.7		0.5	5.7	3.4	3.7
zn_nh3-2_h2o-1_oh-1_P1	aNZnO	2	1	14	x	97	96.3	98.7	94.4	94.1	aNZnO	a								-0.7	1.7	-2.6	-2.9		0.7	1.7	2.6	2.9
zn_nh3-2_h2o-1_oh-1_P1	aNZnO	3	1	13	x	130.2	130.9	115.4	127.5	129.9	aNZnO	a								0.7	-14.8	-2.7	-0.3		0.7	14.8	2.7	0.3
zn_nh3-2_h2o-1_oh-1_P1	aNZnO	3	1	14	x	110.6	110.4	108.7	108.9	107.2	aNZnO	a								-0.2	-1.9	-1.7	-3.4		0.2	1.9	1.7	3.4
zn_nh3-2_h2o-1_oh-1_P1	aOZnO	13	1	14	x	82.8	81.9	93.4	91.6	91.2	aOZnO	a								-0.9	10.6	8.8	8.4		0.9	10.6	8.8	8.4
zn_h2o-2_sh2-2_P2	rZnO	1	12	x	x	2.037	2.046	2.007	2.083	2.035	rZnO	r								0.009	-0.03	0.046	-0.002		0.009	0.03	0.046	0.002
zn_h2o-2_sh2-2_P2	rZnO	1	13	x	x	2.045	2.055	2	2.084	2.037	rZnO	r								0.01	-0.045	0.039	-0.008		0.01	0.045	0.039	0.008
zn_h2o-2_sh2-2_P2	rZnS	1	2	x	x	2.419	2.413	2.232	2.338	2.39	rZnS	r								-0.006	-0.187	-0.081	-0.029		0.006	0.187	0.081	0.029
zn_h2o-2_sh2-2_P2	rZnS	1	3	x	x	2.419	2.413	2.232	2.338	2.39	rZnS	r								-0.006	-0.187	-0.081	-0.029		0.006	0.187	0.081	0.029
zn_h2o-2_sh2-2_P2	aOZnO	2	1	3	x	127.7	129	145.7	127.5	126.4	aOZnO	a								1.3	18	-0.2	-1.3		1.3	18	0.2	1.3
zn_h2o-2_sh2-2_P2	aOZnS	2	1	12	x	108.5	108.6	103.4	109.3	108.7	aOZnS	a								0.1	-5.1	0.8	0.2		0.1	5.1	0.8	0.2
zn_h2o-2_sh2-2_P2	aOZnS	2	1	13	x	104.9	104.3	98.7	103.7	104.6	aOZnS	a								-0.6	-6.2	-1.2	-0.3		0.6	6.2	1.2	0.3
zn_h2o-2_sh2-2_P2	aOZnS	3	1	12	x	108.5	108.6	103.4	109.3	108.7	aOZnS	a								0.1	-5.1	0.8	0.2		0.1	5.1	0.8	0.2
zn_h2o-2_sh2-2_P2	aOZnS	3	1	13	x	104.9	104.3	98.7	103.7	104.6	aOZnS	a								-0.6	-6.2	-1.2	-0.3		0.6	6.2	1.2	0.3
zn_h2o-2_sh2-2_P2	aSZnS	12	1	13	x	98.3	97.4	97.5	99.2	100.7	aSZnS	a								-0.9	-0.8	0.9	2.4		0.9	0.8	0.9	2.4
zn_nh3-1_h2o-1_sh2-2_P2	rZnN	1	13	x	x	2.057	2.054	2.062	2.03	2.076	rZnN	r								-0.003	0.005	-0.027	0.019		0.003	0.005	0.027	0.019
zn_nh3-1_h2o-1_sh2-2_P2	rZnO	1	12	x	x	2.067	2.079	2.018	2.111	2.06	rZnO	r								0.012	-0.049	0.044	-0.007		0.012	0.049	0.044	0.007
zn_nh3-1_h2o-1_sh2-2_P2	rZnS	1	2	x	x	2.449	2.446	2.253	2.358	2.407	rZnS	r								-0.003	-0.196	-0.091	-0.042		0.003	0.196	0.091	0.042
zn_nh3-1_h2o-1_sh2-2_P2	rZnS	1	3	x	x	2.45	2.447	2.253	2.354	2.405	rZnS	r								-0.003	-0.197	-0.096	-0.045		0.003	0.197	0.096	0.045
zn_nh3-1_h2o-1_sh2-2_P2	aNZnO	13	1	12	x	105.6	106.1	101.7	105.4	106.7	aNZnO	a								0.5	-3.9	-0.2	1.1		0.5	3.9	0.2	1.1
zn_nh3-1_h2o-1_sh2-2_P2	aNZnS	13	1	2	x	113.5	115.2	115.5	114.8	112.6	aNZnS	a								1.7	2	1.3	-0.9		1.7	2	1.3	0.9
zn_nh3-1_h2o-1_sh2-2_P2	aNZnS	13	1	3	x	117.7	118.3	112.9	115.1	116.8	aNZnS	a								0.6	-4.8	-2.6	-0.9		0.6	4.8	2.6	0.9
zn_nh3-1_h2o-1_sh2-2_P2	aOZnS	12	1	2	x	110.5	109.2	99.1	107.1	108.2	aOZnS	a								-1.3	-11.4	-3.4	-2.3		1.3	11.4	3.4	2.3
zn_nh3-1_h2o-1_sh2-2_P2	aOZnS	12	1	3	x	100.5	99.5	99.1	100.7	101.6	aOZnS	a								-1	-1.4	0.2	1.1		1	1.4	0.2	1.1
zn_nh3-1_h2o-1_sh2-2_P2	aSZnS	2	1	3	x	108.2	107.2	122.8	112.1	109.9	aSZnS	a								-1	14.6	3.9	1.7		1	14.6	3.9	1.7
zn_nh3-1_oh-1_sh2-2_P1	rZnN	1	12	x	x	2.095	2.093	1.975	2.05	2.104	rZnN	r								-0.002	-0.12	-0.045	0.009		0.002	0.12	0.045	0.009
zn_nh3-1_oh-1_sh2-2_P1	rZnO	1	11	x	x	1.823	1.823	1.576	1.862	1.817	rZnO	r								0	-0.247	0.039	-0.006		0	0.247	0.039	0.006
zn_nh3-1_oh-1_sh2-2_P1	rZnS	1	2	x	x	2.527	2.52	2.081	2.44	2.546	rZnS	r								-0.007	-0.446	-0.087	0.019		0.007	0.446	0.087	0.019
zn_nh3-1_oh-1_sh2-2_P1	rZnS	1	3	x	x	2.526	2.528	2.083	2.439	2.545	rZnS	r								0.002	-0.443	-0.087	0.019		0.002	0.443	0.087	0.019
zn_nh3-1_oh-1_sh2-2_P1	aNZnO	12	1	11	x	99.3	97.9	99.5	104.8	113.9	aNZnO	a								-1.4	0.2	5.5	14.6		1.4	0.2	5.5	14.6
zn_nh3-1_oh-1_sh2-2_P1	aNZnS	12	1	2	x	107	107.7	106	107.8	103.2	aNZnS	a								0.7	-1	0.8	-3.8		0.7	1	0.8	3.8
zn_nh3-1_oh-1_sh2-2_P1	aNZnS	12	1	3	x	113	113.3	113.4	108.4	103.3	aNZnS	a								0.3	0.4	-4.6	-9.7		0.3	0.4	4.6	9.7
zn_nh3-1_oh-1_sh2-2_P1	aOZnS	11	1	2	x	119.3	120.6	103.3	113.5	116.1	aOZnS	a								1.3	-16	-5.8	-3.2		1.3	16	5.8	3.2
zn_nh3-1_oh-1_sh2-2_P1	aOZnS	11	1	3	x	115.6	115.3	102.5	114	116.3	aOZnS	a								-0.3	-13.1	-1.6	0.7		0.3	13.1	1.6	0.7
zn_nh3-1_oh-1_sh2-2_P1	aSZnS	2	1	3	x	102.7	102.2	127.8	108	102.3	aSZnS	a								-0.5	25.1	5.3	-0.4		0.5	25.1	5.3	0.4
zn_nh3-1_h2o-1_sh2-1_sh-1_P1	rZnN	1	12	x	x	2.084	2.08	2.071	2.052	2.109	rZnN	r								-0.004	-0.013	-0.032	0.025		0.004	0.013	0.032	0.025
zn_nh3-1_h2o-1_sh2-1_sh-1_P1	rZnO	1	11	x	x	2.172	2.183	2.08	2.206	2.151	rZnO	r								0.011	-0.092	0.034	-0.021		0.011	0.092	0.034	0.021
zn_nh3-1_h2o-1_sh2-1_sh-1_P1	rZnS	1	2	x	x	2.544	2.547	2.246	2.432	2.551	rZnS	r								0.003	-0.298	-0.112	0.007		0.003	0.298	0.112	0.007
zn_nh3-1_h2o-1_sh2-1_sh-1_P1	rZnS	1	3	x	x	2.211	2.21	2.174	2.202	2.207	rZnS	r								-0.001	-0.037	-0.009	-0.004		0.001	0.037	0.009	0.004
zn_nh3-1_h2o-1_sh2-1_sh-1_P1	aNZnO	12	1	11	x	98.4	98	105.9	97.6	97.4	aNZnO	a								-0.4	7.5	-0.8	-1		0.4	7.5	0.8	1
zn_nh3-1_h2o-1_sh2-1_sh-1_P1	aNZnS	12	1	2	x	104.7	104.8	107.4	110	104.3	aNZnS	a								0.1	2.7	5.3	-0.4		0.1	2.7	5.3	0.4
zn_nh3-1_h2o-1_sh2-1_sh-1_P1	aNZnS	12	1	3	x	130.4	132.1	119.7	130.4	133.8	aNZnS	a								1.7	-10.7	0	3.4		1.7	10.7	0	3.4
zn_nh3-1_h2o-1_sh2-1_sh-1_P1	aOZnS	11	1	2	x	98.4	98.6	92.7	95.2	94.3	aOZnS	a								0.2	-5.7	-3.2	-4.1		0.2	5.7	3.2	4.1
zn_nh3-1_h2o-1_sh2-1_sh-1_P1	aOZnS	11	1	3	x	104	103.4	96.1	106.2	108.1	aOZnS	a								-0.6	-7.9	2.2	4.1		0.6	7.9	2.2	4.1
zn_nh3-1_h2o-1_sh2-1_sh-1_P1	aSZnS	2	1	3	x	114.7	113.5	127.1	110.4	111.2	aSZnS	a								-1.2	12.4	-4.3	-3.5		1.2	12.4	4.3	3.5
zn_nh3-3_sh2-1_P2	rZnN	1	2	x	x	2.084	2.084	2.061	2.047	2.09	rZnN	r								0	-0.023	-0.037	0.006		0	0.023	0.037	0.006
zn_nh3-3_sh2-1_P2	rZnN	1	3	x	x	2.08	2.079	2.061	2.049	2.092	rZnN	r								-0.001	-0.019	-0.031	0.012		0.001	0.019	0.031	0.012
zn_nh3-3_sh2-1_P2	rZnN	1	4	x	x	2.084	2.084	2.061	2.047	2.09	rZnN	r								0	-0.023	-0.037	0.006		0	0.023	0.037	0.006
zn_nh3-3_sh2-1_P2	rZnS	1	16	x	x	2.49	2.49	2.243	2.382	2.429	rZnS	r								0	-0.247	-0.108	-0.061		0	0.247	0.108	0.061
zn_nh3-3_sh2-1_P2	aNZnN	2	1	3	x	111	111.2	105.6	110.7	110.7	aNZnN	a								0.2	-5.4	-0.3	-0.3		0.2	5.4	0.3	0.3
zn_nh3-3_sh2-1_P2	aNZnN	2	1	4	x	110	110.2	104.8	109.6	109.6	aNZnN	a								0.2	-5.2	-0.4	-0.4		0.2	5.2	0.4	0.4
zn_nh3-3_sh2-1_P2	aNZnN	3	1	4	x	111	111.2	105.6	110.7	110.7	aNZnN	a								0.2	-5.4	-0.3	-0.3		0.2	5.4	0.3	0.3
zn_nh3-3_sh2-1_P2	aNZnS	2	1	16	x	105.7	105.1	111	106.2	106.2	aNZnS	a								-0.6	5.3	0.5	0.5		0.6	5.3	0.5	0.5
zn_nh3-3_sh2-1_P2	aNZnS	3	1	16	x	113.1	113.8	117.9	113.3	113.3	aNZnS	a								0.7	4.8	0.2	0.2		0.7	4.8	0.2	0.2
zn_nh3-3_sh2-1_P2	aNZnS	4	1	16	x	105.7	105.1	111	106.2	106.2	aNZnS	a								-0.6	5.3	0.5	0.5		0.6	5.3	0.5	0.5
zn_nh3-3_sh-1_P1	rZnN	1	2	x	x	2.143	2.142	2.082	2.1	2.165	rZnN	r								-0.001	-0.061	-0.043	0.022		0.001	0.061	0.043	0.022
zn_nh3-3_sh-1_P1	rZnN	1	3	x	x	2.143	2.142	2.082	2.099	2.165	rZnN	r								-0.001	-0.061	-0.044	0.022		0.001	0.061	0.044	0.022
zn_nh3-3_sh-1_P1	rZnN	1	4	x	x	2.14	2.141	2.078	2.077	2.147	rZnN	r								0.001	-0.062	-0.063	0.007		0.001	0.062	0.063	0.007
zn_nh3-3_sh-1_P1	rZnS	1	15	x	x	2.235	2.235	2.186	2.23	2.225	rZnS	r								0	-0.049	-0.005	-0.01		0	0.049	0.005	0.01
zn_nh3-3_sh-1_P1	aNZnN	2	1	3	x	105	105	106.1	106.6	103.6	aNZnN	a								0	1.1	1.6	-1.4		0	1.1	1.6	1.4
zn_nh3-3_sh-1_P1	aNZnN	2	1	4	x	105.2	105.3	105.1	106.9	104.1	aNZnN	a								0.1	-0.1	1.7	-1.1		0.1	0.1	1.7	1.1
zn_nh3-3_sh-1_P1	aNZnN	3	1	4	x	105.2	105.3	105.1	106.9	104.1	aNZnN	a								0.1	-0.1	1.7	-1.1		0.1	0.1	1.7	1.1
zn_nh3-3_sh-1_P1	aNZnS	2	1	15	x	116	116.2	115.2	114.7	117.2	aNZnS	a								0.2	-0.8	-1.3	1.2		0.2	0.8	1.3	1.2
zn_nh3-3_sh-1_P1	aNZnS	3	1	15	x	116	116.2	115.2	114.8	117.3	aNZnS	a								0.2	-0.8	-1.2	1.3		0.2	0.8	1.2	1.3
zn_nh3-3_sh-1_P1	aNZnS	4	1	15	x	108.4	107.8	109.1	106.4	109.1	aNZnS	a								-0.6	0.7	-2	0.7		0.6	0.7	2	0.7
zn_nh3-2_sh2-2_P2	rZnN	1	2	x	x	2.08	2.079	2.068	2.047	2.089	rZnN	r								-0.001	-0.012	-0.033	0.009		0.001	0.012	0.033	0.009
zn_nh3-2_sh2-2_P2	rZnN	1	3	x	x	2.08	2.079	2.068	2.047	2.089	rZnN	r								-0.001	-0.012	-0.033	0.009		0.001	0.012	0.033	0.009
zn_nh3-2_sh2-2_P2	rZnS	1	14	x	x	2.476	2.473	2.254	2.381	2.428	rZnS	r								-0.003	-0.222	-0.095	-0.048		0.003	0.222	0.095	0.048
zn_nh3-2_sh2-2_P2	rZnS	1	15	x	x	2.476	2.473	2.254	2.381	2.428	rZnS	r								-0.003	-0.222	-0.095	-0.048		0.003	0.222	0.095	0.048
zn_nh3-2_sh2-2_P2	aNZnN	2	1	3	x	110.5	110.6	102.3	109.6	109.6	aNZnN	a								0.1	-8.2	-0.9	-0.9		0.1	8.2	0.9	0.9
zn_nh3-2_sh2-2_P2	aNZnS	2	1	14	x	107.2	107	105.7	107.4	107.4	aNZnS	a								-0.2	-1.5	0.2	0.2		0.2	1.5	0.2	0.2
zn_nh3-2_sh2-2_P2	aNZnS	2	1	15	x	107.1	107	105.7	107.4	107.4	aNZnS	a								-0.1	-1.4	0.3	0.3		0.1	1.4	0.3	0.3
zn_nh3-2_sh2-2_P2	aNZnS	3	1	14	x	107.2	107	105.7	107.4	107.4	aNZnS	a								-0.2	-1.5	0.2	0.2		0.2	1.5	0.2	0.2
zn_nh3-2_sh2-2_P2	aNZnS	3	1	15	x	107.1	107	105.7	107.4	107.4	aNZnS	a								-0.1	-1.4	0.3	0.3		0.1	1.4	0.3	0.3
zn_nh3-2_sh2-2_P2	aSZnS	14	1	15	x	117.7	118.3	128.7	117.4	117.5	aSZnS	a								0.6	11	-0.3	-0.2		0.6	11	0.3	0.2
zn_nh3-2_sh2-1_sh-1_P1	rZnN	1	2	x	x	2.124	2.123	2.083	2.074	2.14	rZnN	r								-0.001	-0.041	-0.05	0.016		0.001	0.041	0.05	0.016
zn_nh3-2_sh2-1_sh-1_P1	rZnN	1	3	x	x	2.118	2.118	2.085	2.078	2.139	rZnN	r								0	-0.033	-0.04	0.021		0	0.033	0.04	0.021
zn_nh3-2_sh2-1_sh-1_P1	rZnS	1	13	x	x	2.637	2.637	2.278	2.503	2.585	rZnS	r								0	-0.359	-0.134	-0.052		0	0.359	0.134	0.052
zn_nh3-2_sh2-1_sh-1_P1	rZnS	1	14	x	x	2.222	2.221	2.185	2.216	2.214	rZnS	r								-0.001	-0.037	-0.006	-0.008		0.001	0.037	0.006	0.008
zn_nh3-2_sh2-1_sh-1_P1	aNZnN	2	1	3	x	106.7	106.4	103.7	109.1	105.7	aNZnN	a								-0.3	-3	2.4	-1		0.3	3	2.4	1
zn_nh3-2_sh2-1_sh-1_P1	aNZnS	2	1	13	x	98	98	103.6	100.9	98.1	aNZnS	a								0	5.6	2.9	0.1		0	5.6	2.9	0.1
zn_nh3-2_sh2-1_sh-1_P1	aNZnS	2	1	14	x	112.7	112.8	105.3	111.2	113.8	aNZnS	a								0.1	-7.4	-1.5	1.1		0.1	7.4	1.5	1.1
zn_nh3-2_sh2-1_sh-1_P1	aNZnS	3	1	13	x	102.9	102.2	108.3	103.2	100	aNZnS	a								-0.7	5.4	0.3	-2.9		0.7	5.4	0.3	2.9
zn_nh3-2_sh2-1_sh-1_P1	aNZnS	3	1	14	x	121.3	122	112.3	122	125.1	aNZnS	a								0.7	-9	0.7	3.8		0.7	9	0.7	3.8
zn_nh3-2_sh2-1_sh-1_P1	aSZnS	13	1	14	x	112.4	112.3	121.7	108	110.2	aSZnS	a								-0.1	9.3	-4.4	-2.2		0.1	9.3	4.4	2.2
zn_nh3-1_h2o-4_P2	rZnO	1	2	x	x	2.076	2.085	2.1	2.137	2.092	rZnO	r								0.009	0.024	0.061	0.016		0.009	0.024	0.061	0.016
zn_nh3-1_h2o-4_P2	rZnO	1	3	x	x	2.076	2.085	2.101	2.137	2.092	rZnO	r								0.009	0.025	0.061	0.016		0.009	0.025	0.061	0.016
zn_nh3-1_h2o-4_P2	rZnO	1	4	x	x	2.1	2.104	2.1	2.154	2.106	rZnO	r								0.004	0	0.054	0.006		0.004	0	0.054	0.006
zn_nh3-1_h2o-4_P2	rZnO	1	5	x	x	2.155	2.161	2.101	2.228	2.175	rZnO	r								0.006	-0.054	0.073	0.02		0.006	0.054	0.073	0.02
zn_nh3-1_h2o-4_P2	rZnN	1	14	x	x	2.092	2.085	2.05	2.062	2.131	rZnN	r								-0.007	-0.042	-0.03	0.039		0.007	0.042	0.03	0.039
zn_nh3-1_h2o-4_P2	aOZnO	2	1	3	x	131.2	135.4	121.4	118.3	119.1	aOZnO	a								4.2	-9.8	-12.9	-12.1		4.2	9.8	12.9	12.1
zn_nh3-1_h2o-4_P2	aOZnO	2	1	4	x	112.9	110.5	76.5	118.8	119.2	aOZnO	a								-2.4	-36.4	5.9	6.3		2.4	36.4	5.9	6.3
zn_nh3-1_h2o-4_P2	aOZnO	2	1	5	x	83.8	83.3	76	83.8	85.1	aOZnO	a								-0.5	-7.8	0	1.3		0.5	7.8	0	1.3
zn_nh3-1_h2o-4_P2	aOZnO	3	1	4	x	112.9	110.5	76.1	118.8	119.2	aOZnO	a								-2.4	-36.8	5.9	6.3		2.4	36.8	5.9	6.3
zn_nh3-1_h2o-4_P2	aOZnO	3	1	5	x	83.8	83.3	75.8	83.8	85.1	aOZnO	a								-0.5	-8	0	1.3		0.5	8	0	1.3
zn_nh3-1_h2o-4_P2	aOZnO	4	1	5	x	85.3	85.3	121.2	82.2	84	aOZnO	a								0	35.9	-3.1	-1.3		0	35.9	3.1	1.3
zn_nh3-1_h2o-4_P2	aNZnO	2	1	14	x	94.9	94.9	119.2	97.6	95.9	aNZnO	a								0	24.3	2.7	1		0	24.3	2.7	1
zn_nh3-1_h2o-4_P2	aNZnO	3	1	14	x	94.9	94.9	119.4	97.6	95.9	aNZnO	a								0	24.5	2.7	1		0	24.5	2.7	1
zn_nh3-1_h2o-4_P2	aNZnO	4	1	14	x	97.8	99.6	119.1	95.2	94.1	aNZnO	a								1.8	21.3	-2.6	-3.7		1.8	21.3	2.6	3.7
zn_nh3-1_h2o-4_P2	aNZnO	5	1	14	x	176.9	175.1	119.7	177.4	178.1	aNZnO	a								-1.8	-57.2	0.5	1.2		1.8	57.2	0.5	1.2
zn_nh3-2_h2o-4_P2	rZnN	13	16	x	x	2.127	2.12	2.105	2.064	2.146	rZnN	r								-0.007	-0.022	-0.063	0.019		0.007	0.022	0.063	0.019
zn_nh3-2_h2o-4_P2	rZnN	13	17	x	x	2.121	2.113	2.106	2.068	2.146	rZnN	r								-0.008	-0.015	-0.053	0.025		0.008	0.015	0.053	0.025
zn_nh3-2_h2o-4_P2	rZnO	13	14	x	x	2.231	2.24	2.209	2.368	2.244	rZnO	r								0.009	-0.022	0.137	0.013		0.009	0.022	0.137	0.013
zn_nh3-2_h2o-4_P2	rZnO	13	15	x	x	2.208	2.211	2.256	2.252	2.206	rZnO	r								0.003	0.048	0.044	-0.002		0.003	0.048	0.044	0.002
zn_nh3-2_h2o-4_P2	rZnO	13	20	x	x	2.232	2.244	2.192	2.281	2.235	rZnO	r								0.012	-0.04	0.049	0.003		0.012	0.04	0.049	0.003
zn_nh3-2_h2o-4_P2	rZnO	13	21	x	x	2.206	2.213	2.192	2.251	2.206	rZnO	r								0.007	-0.014	0.045	0		0.007	0.014	0.045	0
zn_nh3-2_h2o-4_P2	aNZnN	16	13	17	x	101.8	102.8	113.5	112.8	104.4	aNZnN	a								1	11.7	11	2.6		1	11.7	11	2.6
zn_nh3-2_h2o-4_P2	aNZnO	16	13	14	x	90.2	90.3	95.6	83.2	87.8	aNZnO	a								0.1	5.4	-7	-2.4		0.1	5.4	7	2.4
zn_nh3-2_h2o-4_P2	aNZnO	16	13	15	x	95.1	95.6	101.1	96.7	95.8	aNZnO	a								0.5	6	1.6	0.7		0.5	6	1.6	0.7
zn_nh3-2_h2o-4_P2	aNZnO	16	13	20	x	168.3	167.2	138.5	156.2	165.8	aNZnO	a								-1.1	-29.8	-12.1	-2.5		1.1	29.8	12.1	2.5
zn_nh3-2_h2o-4_P2	aNZnO	16	13	21	x	95.2	95.6	82	96.7	95.9	aNZnO	a								0.4	-13.2	1.5	0.7		0.4	13.2	1.5	0.7
zn_nh3-2_h2o-4_P2	aNZnO	17	13	14	x	168	167	144.6	164	167.9	aNZnO	a								-1	-23.4	-4	-0.1		1	23.4	4	0.1
zn_nh3-2_h2o-4_P2	aNZnO	17	13	15	x	95	95.6	88.6	94.7	94	aNZnO	a								0.6	-6.4	-0.3	-1		0.6	6.4	0.3	1
zn_nh3-2_h2o-4_P2	aNZnO	17	13	20	x	89.8	90	100	91	89.9	aNZnO	a								0.2	10.2	1.2	0.1		0.2	10.2	1.2	0.1
zn_nh3-2_h2o-4_P2	aNZnO	17	13	21	x	95.3	95.3	102.1	94.7	94	aNZnO	a								0	6.8	-0.6	-1.3		0	6.8	0.6	1.3
zn_nh3-2_h2o-4_P2	aOZnO	14	13	15	x	83.7	83	65.5	83	84.6	aOZnO	a								-0.7	-18.2	-0.7	0.9		0.7	18.2	0.7	0.9
zn_nh3-2_h2o-4_P2	aOZnO	14	13	20	x	78.1	77	66	73	78	aOZnO	a								-1.1	-12.1	-5.1	-0.1		1.1	12.1	5.1	0.1
zn_nh3-2_h2o-4_P2	aOZnO	14	13	21	x	83.5	83.2	101.4	82.9	84.5	aOZnO	a								-0.3	17.9	-0.6	1		0.3	17.9	0.6	1
zn_nh3-2_h2o-4_P2	aOZnO	15	13	20	x	83.8	83.1	103.6	80.7	82.9	aOZnO	a								-0.7	19.8	-3.1	-0.9		0.7	19.8	3.1	0.9
zn_nh3-2_h2o-4_P2	aOZnO	15	13	21	x	163.7	162.2	166.6	159.3	163.7	aOZnO	a								-1.5	2.9	-4.4	0		1.5	2.9	4.4	0
zn_nh3-2_h2o-4_P2	aOZnO	20	13	21	x	83.6	82.9	67	80.7	82.9	aOZnO	a								-0.7	-16.6	-2.9	-0.7		0.7	16.6	2.9	0.7
zn_nh3-2_h2o-1_sh2-1_P2	rZnN	1	2	x	x	2.062	2.06	2.056	2.031	2.076	rZnN	r								-0.002	-0.006	-0.031	0.014		0.002	0.006	0.031	0.014
zn_nh3-2_h2o-1_sh2-1_P2	rZnN	1	3	x	x	2.062	2.06	2.056	2.031	2.076	rZnN	r								-0.002	-0.006	-0.031	0.014		0.002	0.006	0.031	0.014
zn_nh3-2_h2o-1_sh2-1_P2	rZnO	1	12	x	x	2.074	2.087	2.02	2.114	2.063	rZnO	r								0.013	-0.054	0.04	-0.011		0.013	0.054	0.04	0.011
zn_nh3-2_h2o-1_sh2-1_P2	rZnS	1	13	x	x	2.453	2.45	2.238	2.347	2.401	rZnS	r								-0.003	-0.215	-0.106	-0.052		0.003	0.215	0.106	0.052
zn_nh3-2_h2o-1_sh2-1_P2	aNZnN	2	1	3	x	115.6	116.2	107.8	114.9	114.4	aNZnN	a								0.6	-7.8	-0.7	-1.2		0.6	7.8	0.7	1.2
zn_nh3-2_h2o-1_sh2-1_P2	aNZnO	2	1	12	x	105.3	105.1	100.8	104.6	105.5	aNZnO	a								-0.2	-4.5	-0.7	0.2		0.2	4.5	0.7	0.2
zn_nh3-2_h2o-1_sh2-1_P2	aNZnO	3	1	12	x	105.3	105.1	100.8	104.6	105.5	aNZnO	a								-0.2	-4.5	-0.7	0.2		0.2	4.5	0.7	0.2
zn_nh3-2_h2o-1_sh2-1_P2	aNZnS	2	1	13	x	110.5	110.2	116.9	111.4	110.6	aNZnS	a								-0.3	6.4	0.9	0.1		0.3	6.4	0.9	0.1
zn_nh3-2_h2o-1_sh2-1_P2	aNZnS	3	1	13	x	110.5	110.2	116.9	111.4	110.5	aNZnS	a								-0.3	6.4	0.9	0		0.3	6.4	0.9	0
zn_nh3-2_h2o-1_sh2-1_P2	aOZnS	12	1	13	x	109.1	109.6	111.4	109.4	110	aOZnS	a								0.5	2.3	0.3	0.9		0.5	2.3	0.3	0.9
zn_nh3-2_oh-1_sh2-1_P1	rZnN	1	2	x	x	2.093	2.102	1.983	2.051	2.126	rZnN	r								0.009	-0.11	-0.042	0.033		0.009	0.11	0.042	0.033
zn_nh3-2_oh-1_sh2-1_P1	rZnN	1	3	x	x	2.11	2.105	1.988	2.059	2.131	rZnN	r								-0.005	-0.122	-0.051	0.021		0.005	0.122	0.051	0.021
zn_nh3-2_oh-1_sh2-1_P1	rZnO	1	11	x	x	1.829	1.838	1.592	1.887	1.825	rZnO	r								0.009	-0.237	0.058	-0.004		0.009	0.237	0.058	0.004
zn_nh3-2_oh-1_sh2-1_P1	rZnS	1	12	x	x	2.581	2.554	2.098	2.448	2.576	rZnS	r								-0.027	-0.483	-0.133	-0.005		0.027	0.483	0.133	0.005
zn_nh3-2_oh-1_sh2-1_P1	aNZnN	2	1	3	x	112.5	110.6	106.2	116	109.2	aNZnN	a								-1.9	-6.3	3.5	-3.3		1.9	6.3	3.5	3.3
zn_nh3-2_oh-1_sh2-1_P1	aNZnO	2	1	11	x	126.7	119.8	101.8	123.5	128.4	aNZnO	a								-6.9	-24.9	-3.2	1.7		6.9	24.9	3.2	1.7
zn_nh3-2_oh-1_sh2-1_P1	aNZnO	3	1	11	x	96.9	119.1	101.5	104.2	108	aNZnO	a								22.2	4.6	7.3	11.1		22.2	4.6	7.3	11.1
zn_nh3-2_oh-1_sh2-1_P1	aNZnS	2	1	12	x	107.1	111.7	120.3	114.5	104.1	aNZnS	a								4.6	13.2	7.4	-3		4.6	13.2	7.4	3
zn_nh3-2_oh-1_sh2-1_P1	aNZnS	3	1	12	x	102.7	104	114.2	103.6	99.2	aNZnS	a								1.3	11.5	0.9	-3.5		1.3	11.5	0.9	3.5
zn_nh3-2_oh-1_sh2-1_P1	aOZnS	11	1	12	x	108.4	87.8	110.5	91.1	103.9	aOZnS	a								-20.6	2.1	-17.3	-4.5		20.6	2.1	17.3	4.5
zn_nh3-2_h2o-1_sh-1_P1	rZnN	1	2	x	x	2.096	2.095	2.063	2.062	2.128	rZnN	r								-0.001	-0.033	-0.034	0.032		0.001	0.033	0.034	0.032
zn_nh3-2_h2o-1_sh-1_P1	rZnN	1	3	x	x	2.105	2.102	2.065	2.064	2.135	rZnN	r								-0.003	-0.04	-0.041	0.03		0.003	0.04	0.041	0.03
zn_nh3-2_h2o-1_sh-1_P1	rZnO	1	12	x	x	2.195	2.214	2.08	2.237	2.19	rZnO	r								0.019	-0.115	0.042	-0.005		0.019	0.115	0.042	0.005
zn_nh3-2_h2o-1_sh-1_P1	rZnS	1	13	x	x	2.219	2.219	2.179	2.203	2.211	rZnS	r								0	-0.04	-0.016	-0.008		0	0.04	0.016	0.008
zn_nh3-2_h2o-1_sh-1_P1	aNZnN	2	1	3	x	109.6	109.9	107.5	110.5	106.4	aNZnN	a								0.3	-2.1	0.9	-3.2		0.3	2.1	0.9	3.2
zn_nh3-2_h2o-1_sh-1_P1	aNZnO	2	1	12	x	99.6	101.7	97.4	100.6	100.1	aNZnO	a								2.1	-2.2	1	0.5		2.1	2.2	1	0.5
zn_nh3-2_h2o-1_sh-1_P1	aNZnO	3	1	12	x	99.3	95.8	104.7	94.2	93.3	aNZnO	a								-3.5	5.4	-5.1	-6		3.5	5.4	5.1	6
zn_nh3-2_h2o-1_sh-1_P1	aNZnS	2	1	13	x	125.4	126.1	126.9	126.2	127.9	aNZnS	a								0.7	1.5	0.8	2.5		0.7	1.5	0.8	2.5
zn_nh3-2_h2o-1_sh-1_P1	aNZnS	3	1	13	x	116.3	116.2	117.8	114.3	116.3	aNZnS	a								-0.1	1.5	-2	0		0.1	1.5	2	0
zn_nh3-2_h2o-1_sh-1_P1	aOZnS	12	1	13	x	100.5	99.8	96.6	104.2	105.7	aOZnS	a								-0.7	-3.9	3.7	5.2		0.7	3.9	3.7	5.2
zn_nh3-1_h2o-3_P2	rZnN	1	11	x	x	2.024	2.022	2.05	1.999	2.049	rZnN	r								-0.002	0.026	-0.025	0.025		0.002	0.026	0.025	0.025
zn_nh3-1_h2o-3_P2	rZnO	1	2	x	x	2.02	2.028	2.016	2.059	2.018	rZnO	r								0.008	-0.004	0.039	-0.002		0.008	0.004	0.039	0.002
zn_nh3-1_h2o-3_P2	rZnO	1	3	x	x	2.02	2.028	2.016	2.059	2.018	rZnO	r								0.008	-0.004	0.039	-0.002		0.008	0.004	0.039	0.002
zn_nh3-1_h2o-3_P2	rZnO	1	4	x	x	2.019	2.026	2.016	2.059	2.018	rZnO	r								0.007	-0.003	0.04	-0.001		0.007	0.003	0.04	0.001
zn_nh3-1_h2o-3_P2	aNZnO	11	1	2	x	115.9	116.4	114.2	114.6	114	aNZnO	a								0.5	-1.7	-1.3	-1.9		0.5	1.7	1.3	1.9
zn_nh3-1_h2o-3_P2	aNZnO	11	1	3	x	115.9	116.4	114.2	114.6	114.1	aNZnO	a								0.5	-1.7	-1.3	-1.8		0.5	1.7	1.3	1.8
zn_nh3-1_h2o-3_P2	aNZnO	11	1	4	x	115.9	116.6	114.3	114.6	114.1	aNZnO	a								0.7	-1.6	-1.3	-1.8		0.7	1.6	1.3	1.8
zn_nh3-1_h2o-3_P2	aOZnO	2	1	3	x	102.2	101.6	104.3	103.9	104.5	aOZnO	a								-0.6	2.1	1.7	2.3		0.6	2.1	1.7	2.3
zn_nh3-1_h2o-3_P2	aOZnO	2	1	4	x	102.3	101.7	104.3	103.9	104.5	aOZnO	a								-0.6	2	1.6	2.2		0.6	2	1.6	2.2
zn_nh3-1_h2o-3_P2	aOZnO	3	1	4	x	102.4	101.7	104.3	103.9	104.5	aOZnO	a								-0.7	1.9	1.5	2.1		0.7	1.9	1.5	2.1
zn_nh3-1_h2o-2_oh-1_P1	rZnN	1	10	x	x	2.03	2.024	1.952	2.004	2.066	rZnN	r								-0.006	-0.078	-0.026	0.036		0.006	0.078	0.026	0.036
zn_nh3-1_h2o-2_oh-1_P1	rZnO	1	2	x	x	2.119	2.129	2.1	2.182	2.158	rZnO	r								0.01	-0.019	0.063	0.039		0.01	0.019	0.063	0.039
zn_nh3-1_h2o-2_oh-1_P1	rZnO	1	3	x	x	1.82	1.82	1.623	1.844	1.814	rZnO	r								0	-0.197	0.024	-0.006		0	0.197	0.024	0.006
zn_nh3-1_h2o-2_oh-1_P1	rZnO	1	4	x	x	2.12	2.129	2.1	2.182	2.158	rZnO	r								0.009	-0.02	0.062	0.038		0.009	0.02	0.062	0.038
zn_nh3-1_h2o-2_oh-1_P1	aNZnO	10	1	2	x	107.3	107.1	101.7	106	102.2	aNZnO	a								-0.2	-5.6	-1.3	-5.1		0.2	5.6	1.3	5.1
zn_nh3-1_h2o-2_oh-1_P1	aNZnO	10	1	3	x	148.1	150.1	140.2	143.1	145.9	aNZnO	a								2	-7.9	-5	-2.2		2	7.9	5	2.2
zn_nh3-1_h2o-2_oh-1_P1	aNZnO	10	1	4	x	106.3	107	101.6	105.9	102.4	aNZnO	a								0.7	-4.7	-0.4	-3.9		0.7	4.7	0.4	3.9
zn_nh3-1_h2o-2_oh-1_P1	aOZnO	2	1	3	x	91.8	90.3	101	97.4	98.9	aOZnO	a								-1.5	9.2	5.6	7.1		1.5	9.2	5.6	7.1
zn_nh3-1_h2o-2_oh-1_P1	aOZnO	2	1	4	x	106.5	106.9	109.3	99.8	99.3	aOZnO	a								0.4	2.8	-6.7	-7.2		0.4	2.8	6.7	7.2
zn_nh3-1_h2o-2_oh-1_P1	aOZnO	3	1	4	x	91.9	90.3	101.1	97.6	100.3	aOZnO	a								-1.6	9.2	5.7	8.4		1.6	9.2	5.7	8.4
zn_nh3-1_sh2-3_P2	rZnN	1	8	x	x	2.073	2.072	2.079	2.052	2.092	rZnN	r								-0.001	0.006	-0.021	0.019		0.001	0.006	0.021	0.019
zn_nh3-1_sh2-3_P2	rZnS	1	12	x	x	2.471	2.466	2.289	2.382	2.428	rZnS	r								-0.005	-0.182	-0.089	-0.043		0.005	0.182	0.089	0.043
zn_nh3-1_sh2-3_P2	rZnS	1	13	x	x	2.476	2.473	2.297	2.383	2.428	rZnS	r								-0.003	-0.179	-0.093	-0.048		0.003	0.179	0.093	0.048
zn_nh3-1_sh2-3_P2	rZnS	1	14	x	x	2.471	2.466	2.289	2.382	2.428	rZnS	r								-0.005	-0.182	-0.089	-0.043		0.005	0.182	0.089	0.043
zn_nh3-1_sh2-3_P2	aNZnS	8	1	12	x	108.2	108.2	103.1	107.3	107.3	aNZnS	a								0	-5.1	-0.9	-0.9		0	5.1	0.9	0.9
zn_nh3-1_sh2-3_P2	aNZnS	8	1	13	x	114.3	115	109	113.7	113.7	aNZnS	a								0.7	-5.3	-0.6	-0.6		0.7	5.3	0.6	0.6
zn_nh3-1_sh2-3_P2	aNZnS	8	1	14	x	108.2	108.2	103.1	107.3	107.3	aNZnS	a								0	-5.1	-0.9	-0.9		0	5.1	0.9	0.9
zn_nh3-1_sh2-3_P2	aSZnS	12	1	13	x	104	103.3	109.5	105.6	105.5	aSZnS	a								-0.7	5.5	1.6	1.5		0.7	5.5	1.6	1.5
zn_nh3-1_sh2-3_P2	aSZnS	12	1	14	x	118.2	119.1	121.8	117.5	117.7	aSZnS	a								0.9	3.6	-0.7	-0.5		0.9	3.6	0.7	0.5
zn_nh3-1_sh2-3_P2	aSZnS	13	1	14	x	104	103.3	109.5	105.6	105.5	aSZnS	a								-0.7	5.5	1.6	1.5		0.7	5.5	1.6	1.5
zn_nh3-1_sh2-2_sh-1_P1	rZnN	1	7	x	x	2.104	2.1	2.092	2.067	2.122	rZnN	r								-0.004	-0.012	-0.037	0.018		0.004	0.012	0.037	0.018
zn_nh3-1_sh2-2_sh-1_P1	rZnS	1	11	x	x	2.575	2.577	2.31	2.471	2.554	rZnS	r								0.002	-0.265	-0.104	-0.021		0.002	0.265	0.104	0.021
zn_nh3-1_sh2-2_sh-1_P1	rZnS	1	12	x	x	2.6	2.598	2.311	2.458	2.549	rZnS	r								-0.002	-0.289	-0.142	-0.051		0.002	0.289	0.142	0.051
zn_nh3-1_sh2-2_sh-1_P1	rZnS	1	13	x	x	2.217	2.216	2.194	2.213	2.212	rZnS	r								-0.001	-0.023	-0.004	-0.005		0.001	0.023	0.004	0.005
zn_nh3-1_sh2-2_sh-1_P1	aNZnS	7	1	11	x	100.9	100.3	101	103.1	99.8	aNZnS	a								-0.6	0.1	2.2	-1.1		0.6	0.1	2.2	1.1
zn_nh3-1_sh2-2_sh-1_P1	aNZnS	7	1	12	x	103.9	104	107.6	107.2	102.9	aNZnS	a								0.1	3.7	3.3	-1		0.1	3.7	3.3	1
zn_nh3-1_sh2-2_sh-1_P1	aNZnS	7	1	13	x	125.4	126.8	112.2	125.9	130.3	aNZnS	a								1.4	-13.2	0.5	4.9		1.4	13.2	0.5	4.9
zn_nh3-1_sh2-2_sh-1_P1	aSZnS	11	1	12	x	98.6	98.8	110	98.7	96.4	aSZnS	a								0.2	11.4	0.1	-2.2		0.2	11.4	0.1	2.2
zn_nh3-1_sh2-2_sh-1_P1	aSZnS	11	1	13	x	110	109.4	112.7	110.3	112	aSZnS	a								-0.6	2.7	0.3	2		0.6	2.7	0.3	2
zn_nh3-1_sh2-2_sh-1_P1	aSZnS	12	1	13	x	114.2	113.4	112.7	108.3	110	aSZnS	a								-0.8	-1.5	-5.9	-4.2		0.8	1.5	5.9	4.2
zn_nh3-4_h2o-1_P2	rZnN	1	11	x	x	2.076	2.075	2.046	2.037	2.081	rZnN	r								-0.001	-0.03	-0.039	0.005		0.001	0.03	0.039	0.005
zn_nh3-4_h2o-1_P2	rZnN	1	12	x	x	2.095	2.095	2.054	2.045	2.092	rZnN	r								0	-0.041	-0.05	-0.003		0	0.041	0.05	0.003
zn_nh3-4_h2o-1_P2	rZnN	1	13	x	x	2.076	2.075	2.046	2.037	2.081	rZnN	r								-0.001	-0.03	-0.039	0.005		0.001	0.03	0.039	0.005
zn_nh3-4_h2o-1_P2	rZnN	1	14	x	x	2.095	2.095	2.054	2.045	2.092	rZnN	r								0	-0.041	-0.05	-0.003		0	0.041	0.05	0.003
zn_nh3-4_h2o-1_P2	rZnO	1	20	x	x	3.798	3.79	3.646	3.651	3.745	rZnO	r								-0.008	-0.152	-0.147	-0.053		0.008	0.152	0.147	0.053
zn_nh3-4_h2o-1_P2	aNZnN	11	1	12	x	111.1	111.1	110.6	111.2	111.2	aNZnN	a								0	-0.5	0.1	0.1		0	0.5	0.1	0.1
zn_nh3-4_h2o-1_P2	aNZnN	11	1	13	x	104.8	104.6	105.9	103	103.5	aNZnN	a								-0.2	1.1	-1.8	-1.3		0.2	1.1	1.8	1.3
zn_nh3-4_h2o-1_P2	aNZnN	11	1	14	x	111.1	111.1	110.6	111.2	111.2	aNZnN	a								0	-0.5	0.1	0.1		0	0.5	0.1	0.1
zn_nh3-4_h2o-1_P2	aNZnN	12	1	13	x	111.1	111.1	110.6	111.2	111.2	aNZnN	a								0	-0.5	0.1	0.1		0	0.5	0.1	0.1
zn_nh3-4_h2o-1_P2	aNZnN	12	1	14	x	107.8	107.7	108.7	109	108.6	aNZnN	a								-0.1	0.9	1.2	0.8		0.1	0.9	1.2	0.8
zn_nh3-4_h2o-1_P2	aNZnN	13	1	14	x	111.1	111.1	110.6	111.2	111.2	aNZnN	a								0	-0.5	0.1	0.1		0	0.5	0.1	0.1
zn_nh3-4_h2o-1_P2	aNZnO	11	1	20	x	52.4	52.3	52.9	51.5	51.8	aNZnO	a								-0.1	0.5	-0.9	-0.6		0.1	0.5	0.9	0.6
zn_nh3-4_h2o-1_P2	aNZnO	12	1	20	x	126.1	126.1	125.6	125.5	125.7	aNZnO	a								0	-0.5	-0.6	-0.4		0	0.5	0.6	0.4
zn_nh3-4_h2o-1_P2	aNZnO	13	1	20	x	52.4	52.3	52.9	51.5	51.8	aNZnO	a								-0.1	0.5	-0.9	-0.6		0.1	0.5	0.9	0.6
zn_nh3-4_h2o-1_P2	aNZnO	14	1	20	x	126.1	126.1	125.6	125.5	125.7	aNZnO	a								0	-0.5	-0.6	-0.4		0	0.5	0.6	0.4

## Sheet: zn_geom_large
Supporting Information for
Parameterization of DFTB3/3OB for Magnesium and Zinc for Chemical and Biological Applications
Xiya Lu, Michael Gaus, Marcus Elstner and Qiang Cui
													N = number of comparisons
Geometric properties													MAD = Mean absolute deviation
Calculated geometries (information based on xyz coordinates provided in the next sheet)													MAX = Maximal absolute deviation
(bond lengths “r” in Angstrom, angles “a” in degree)													MSE = Mean signed error
													Statistics with B3LYP/aug-cc-pVTZ being the reference							Differences to B3LYP/aug-cc-pVTZ					Absolute differences to B3LYP/aug-cc-pVTZ
						B3LYP	B3LYP	PM6	DFTB3/MIO	DFTB3/3OB					B3LYP	PM6	DFTB3/MIO	DFTB3/3OB		B3LYP	PM6	DFTB3/MIO	DFTB3/3OB		B3LYP	PM6	DFTB3/MIO	DFTB3/3OB
molecule	property	atoms involved				aug-cc-pVTZ	6-31+G(d,p)				property	type			6-31+G(d,p)					6-31+G(d,p)					6-31+G(d,p)
zn_sch3ch3-1_P2	rZnS	1	2	x	x	2.337	2.341	2.373	2.238	2.276	rZnS	r	N for bond lengths	173						0.004	0.036	-0.099	-0.061		0.004	0.036	0.099	0.061
zn_sch3ch3-1_P2	rCS	3	2	x	x	1.834	1.842	1.721	1.825	1.842	rCS	r	MAD for bond lengths		0.00490751	0.128306	0.0526358	0.0242254		0.008	-0.113	-0.009	0.008		0.008	0.113	0.009	0.008
zn_sch3ch3-1_P2	rHC	3	4	x	x	1.088	1.092	1.122	1.103	1.092	rHC	r	MAX for bond lengths		0.063	0.955	0.177	0.141		0.004	0.034	0.015	0.004		0.004	0.034	0.015	0.004
zn_sch3ch3-1_P2	aCSZn	3	2	1	x	106.3	106.6	105	110.7	110.3	aCSZn	a	MSE for bond lengths		0.00157803	-0.106572	-0.016185	0.00226012		0.3	-1.3	4.4	4		0.3	1.3	4.4	4
zn_sch3ch3-1_P2	aHCS	4	3	2	x	108	108.3	115.4	110.5	109.9	aHCS	a								0.3	7.4	2.5	1.9		0.3	7.4	2.5	1.9
zn_sch3ch3-2_P2	rZnS	1	2	x	x	2.293	2.298	2.219	2.27	2.286	rZnS	r	N for bond angles	236						0.005	-0.074	-0.023	-0.007		0.005	0.074	0.023	0.007
zn_sch3ch3-2_P2	aSZnS	2	1	7	x	180	180	180	180	180	aSZnS	a	MAD for bond angles		0.561017	5.33347	4.02839	3.275		0	0	0	0		0	0	0	0
zn_sch3ch3-3_P2	rZnS	1	2	x	x	2.374	2.375	2.256	2.354	2.378	rZnS	r	MAX for bond angles		5.1	63.3	25.8	25.8		0.001	-0.118	-0.02	0.004		0.001	0.118	0.02	0.004
zn_sch3ch3-3_P2	aSZnS	2	1	7	x	111	110	116.1	116.9	117.3	aSZnS	a	MSE for bond angles		-0.0381356	-0.217373	-0.295339	-0.229237		-1	5.1	5.9	6.3		1	5.1	5.9	6.3
zn_nch2ch3-1_P2	rZnN	1	2	x	x	1.947	1.951	2.005	1.901	1.935	rZnN	r								0.004	0.058	-0.046	-0.012		0.004	0.058	0.046	0.012
zn_nch2ch3-1_P2	rCN	4	2	x	x	1.497	1.501	1.482	1.467	1.478	rCN	r	MAD of different bond types							0.004	-0.015	-0.03	-0.019		0.004	0.015	0.03	0.019
zn_nch2ch3-1_P2	rC=N	3	2	x	x	1.277	1.285	1.3	1.292	1.295	rC=N	r	rZnN	68	0.00245588	0.111529	0.0582353	0.0177353		0.008	0.023	0.015	0.018		0.008	0.023	0.015	0.018
zn_nch2ch3-1_P2	aCNZn	3	2	1	x	121.4	121.2	127.4	123.1	121.8	aCNZn	a	rZnO	37	0.00951351	0.099973	0.0760811	0.0328919		-0.2	6	1.7	0.4		0.2	6	1.7	0.4
zn_nch2ch3-1_P2	aCNZn	4	2	1	x	115.1	115	111.7	116.7	116	aCNZn	a	rZnS	54	0.00455556	0.187056	0.0375741	0.0271111		-0.1	-3.4	1.6	0.9		0.1	3.4	1.6	0.9
zn_nch2ch3-1_P2	aCNC	3	2	4	x	123.5	123.8	120.8	120.3	122.2	aCNC	a								0.3	-2.7	-3.2	-1.3		0.3	2.7	3.2	1.3
zn_nch2ch3-2_P2	rZnN	1	2	x	x	1.921	1.921	1.908	1.89	1.91	rZnN	r	MAX of different bond types							0	-0.013	-0.031	-0.011		0	0.013	0.031	0.011
zn_nch2ch3-2_P2	aNZnN	2	1	10	x	178.6	178.8	179.6	178.2	178.6	aNZnN	a	rZnN	68	0.012	0.955	0.159	0.097		0.2	1	-0.4	0		0.2	1	0.4	0
zn_nch2ch3-3_P2	rZnN	1	2	x	x	2.005	2.005	1.949	1.98	2.013	rZnN	r	rZnO	37	0.063	0.324	0.15	0.141		0	-0.056	-0.025	0.008		0	0.056	0.025	0.008
zn_nch2ch3-3_P2	aNZnN	2	1	10	x	120.1	120.1	120	120	120	aNZnN	a	rZnS	54	0.043	0.669	0.177	0.1		0	-0.1	-0.1	-0.1		0	0.1	0.1	0.1
zn_nch2ch3-4_P2	rZnN	1	2	x	x	2.078	2.076	1.985	2.034	2.07	rZnN	r								-0.002	-0.093	-0.044	-0.008		0.002	0.093	0.044	0.008
zn_nch2ch3-4_P2	aNZnN	2	1	10	x	110.5	110.8	110.1	111	110.7	aNZnN	a	MSE of different bond types							0.3	-0.4	0.5	0.2		0.3	0.4	0.5	0.2
zn_c3h3n2-1_P1	rZnN	1	2	x	x	1.925	1.937	2.88	1.802	1.828	rZnN	r	rZnN	68	-0.000602941	-0.0797353	-0.0582353	-0.0167059		0.012	0.955	-0.123	-0.097		0.012	0.955	0.123	0.097
zn_c3h3n2-1_P1	rCN	2	3	x	x	1.346	1.35	1.305	1.408	1.411	rCN	r	rZnO	37	0.00378378	-0.0901892	0.0635405	0.0148919		0.004	-0.041	0.062	0.065		0.004	0.041	0.062	0.065
zn_c3h3n2-1_P1	rCC	3	5	x	x	1.4	1.409	1.52	1.373	1.372	rCC	r	rZnS	54	0.0017037	-0.185722	-0.0232407	0.0162222		0.009	0.12	-0.027	-0.028		0.009	0.12	0.027	0.028
zn_c3h3n2-1_P1	rCN	5	8	x	x	1.368	1.372	1.306	1.382	1.384	rCN	r								0.004	-0.062	0.014	0.016		0.004	0.062	0.014	0.016
zn_c3h3n2-1_P1	rC=N	8	4	x	x	1.295	1.303	1.492	1.313	1.321	rC=N	r								0.008	0.197	0.018	0.026		0.008	0.197	0.018	0.026
zn_c3h3n2-1_P1	rCN	4	2	x	x	1.445	1.452	1.492	1.397	1.396	rCN	r								0.007	0.047	-0.048	-0.049		0.007	0.047	0.048	0.049
zn_c3h3n2-1_P1	aCNZn	1	2	3	x	128.2	127.8	124.1	121.9	122	aCNZn	a								-0.4	-4.1	-6.3	-6.2		0.4	4.1	6.3	6.2
zn_c3h3n2-1_P1	aCCN	2	3	5	x	107	107	109.8	106.6	106.2	aCCN	a								0	2.8	-0.4	-0.8		0	2.8	0.4	0.8
zn_c3h3n2-1_P1	aCCN	3	5	8	x	110.6	110.9	109.8	107.6	108.8	aCCN	a								0.3	-0.8	-3	-1.8		0.3	0.8	3	1.8
zn_c3h3n2-1_P1	aCNC	5	8	4	x	105.4	105.1	106.4	110.5	109	aCNC	a								-0.3	1	5.1	3.6		0.3	1	5.1	3.6
zn_c3h3n2-1_P1	aNCN	8	4	2	x	112.3	112.6	107.3	108.1	108.9	aNCN	a								0.3	-5	-4.2	-3.4		0.3	5	4.2	3.4
zn_c3h3n2-1_P1	aCNZn	4	2	1	x	105.1	104	41.8	130.9	130.9	aCNZn	a								-1.1	-63.3	25.8	25.8		1.1	63.3	25.8	25.8
zn_c3h3n2-2	rZnN	1	2	x	x	1.839	1.837	1.76	1.81	1.821	rZnN	r								-0.002	-0.079	-0.029	-0.018		0.002	0.079	0.029	0.018
zn_c3h3n2-2	aNZnN	2	1	10	x	179.6	179.6	179.3	179.2	179.5	aNZnN	a								0	-0.3	-0.4	-0.1		0	0.3	0.4	0.1
zn_sch3_c3h3n2	rZnN	1	7	x	x	1.86	1.86	1.763	1.829	1.841	rZnN	r								0	-0.097	-0.031	-0.019		0	0.097	0.031	0.019
zn_sch3_c3h3n2	rZnS	1	2	x	x	2.158	2.161	2.086	2.151	2.185	rZnS	r								0.003	-0.072	-0.007	0.027		0.003	0.072	0.007	0.027
zn_sch3_c3h3n2	aNZnS	7	1	2	x	178.4	178.5	177	176.2	177.6	aNZnS	a								0.1	-1.4	-2.2	-0.8		0.1	1.4	2.2	0.8
zn_sch3_nch2ch3_P1	rZnN	1	7	x	x	1.971	1.972	1.926	1.935	1.969	rZnN	r								0.001	-0.045	-0.036	-0.002		0.001	0.045	0.036	0.002
zn_sch3_nch2ch3_P1	rZnS	1	2	x	x	2.137	2.14	2.127	2.117	2.174	rZnS	r								0.003	-0.01	-0.02	0.037		0.003	0.01	0.02	0.037
zn_sch3_nch2ch3_P1	aNZnS	7	1	2	x	174.2	174	172.7	165.5	171.7	aNZnS	a								-0.2	-1.5	-8.7	-2.5		0.2	1.5	8.7	2.5
zn_im-1_P2	rZnN	1	2	x	x	1.881	1.891	1.949	1.835	1.849	rZnN	r								0.01	0.068	-0.046	-0.032		0.01	0.068	0.046	0.032
zn_im-1_P2	rCN	2	3	x	x	1.4	1.399	1.416	1.4	1.401	rCN	r								-0.001	0.016	0	0.001		0.001	0.016	0	0.001
zn_im-1_P2	rC=C	3	5	x	x	1.357	1.367	1.387	1.379	1.378	rC=C	r								0.01	0.03	0.022	0.021		0.01	0.03	0.022	0.021
zn_im-1_P2	rCN	5	8	x	x	1.379	1.382	1.406	1.374	1.373	rCN	r								0.003	0.027	-0.005	-0.006		0.003	0.027	0.005	0.006
zn_im-1_P2	rC=N	8	4	x	x	1.323	1.329	1.371	1.337	1.341	rC=N	r								0.006	0.048	0.014	0.018		0.006	0.048	0.014	0.018
zn_im-1_P2	rCN	4	2	x	x	1.354	1.362	1.394	1.377	1.379	rCN	r								0.008	0.04	0.023	0.025		0.008	0.04	0.023	0.025
zn_im-1_P2	aCNZn	1	2	3	x	125.5	125.6	124.9	124.8	125.4	aCNZn	a								0.1	-0.6	-0.7	-0.1		0.1	0.6	0.7	0.1
zn_im-1_P2	aCCN	2	3	5	x	106.8	106.8	107.8	107.4	107.4	aCCN	a								0	1	0.6	0.6		0	1	0.6	0.6
zn_im-1_P2	aCCN	3	5	8	x	106.8	106.8	107.5	106.7	107.3	aCCN	a								0	0.7	-0.1	0.5		0	0.7	0.1	0.5
zn_im-1_P2	aCNC	5	8	4	x	110.3	110.3	108.9	110.5	109.8	aCNC	a								0	-1.4	0.2	-0.5		0	1.4	0.2	0.5
zn_im-1_P2	aNCN	8	4	2	x	107.7	107.6	108.3	107.8	108.3	aNCN	a								-0.1	0.6	0.1	0.6		0.1	0.6	0.1	0.6
zn_im-1_P2	aCNZn	4	2	1	x	125.9	125.2	127.6	127.7	127.3	aCNZn	a								-0.7	1.7	1.8	1.4		0.7	1.7	1.8	1.4
zn_im-2_P2	rZnN	1	2	x	x	1.877	1.875	1.851	1.845	1.858	rZnN	r								-0.002	-0.026	-0.032	-0.019		0.002	0.026	0.032	0.019
zn_im-2_P2	aNZnN	2	1	11	x	178.7	178.7	179.3	177.9	178.2	aNZnN	a								0	0.6	-0.8	-0.5		0	0.6	0.8	0.5
zn_im-3_P2	rZnN	1	10	x	x	1.968	1.967	1.901	1.94	1.974	rZnN	r								-0.001	-0.067	-0.028	0.006		0.001	0.067	0.028	0.006
zn_im-3_P2	aNZnN	1	10	11	x	120.1	120.1	120	120	120	aNZnN	a								0	-0.1	-0.1	-0.1		0	0.1	0.1	0.1
zn_im-1_sch3-1_P1	rZnN	1	7	x	x	1.932	1.933	1.873	1.898	1.925	rZnN	r								0.001	-0.059	-0.034	-0.007		0.001	0.059	0.034	0.007
zn_im-1_sch3-1_P1	rZnS	1	2	x	x	2.137	2.14	2.122	2.122	2.175	rZnS	r								0.003	-0.015	-0.015	0.038		0.003	0.015	0.015	0.038
zn_im-1_sch3-1_P1	aNZnS	7	1	2	x	175.2	175.1	173.6	168.3	173.4	aNZnS	a								-0.1	-1.6	-6.9	-1.8		0.1	1.6	6.9	1.8
zn_im-1_shch3-3_P2	rZnN	10	1	x	x	2.008	2.007	1.935	1.962	1.988	rZnN	r								-0.001	-0.073	-0.046	-0.02		0.001	0.073	0.046	0.02
zn_im-1_shch3-3_P2	rZnS	10	11	x	x	2.454	2.453	2.277	2.407	2.454	rZnS	r								-0.001	-0.177	-0.047	0		0.001	0.177	0.047	0
zn_im-1_shch3-3_P2	rZnS	10	13	x	x	2.448	2.446	2.272	2.415	2.453	rZnS	r								-0.002	-0.176	-0.033	0.005		0.002	0.176	0.033	0.005
zn_im-1_shch3-3_P2	rZnS	10	15	x	x	2.45	2.448	2.27	2.403	2.449	rZnS	r								-0.002	-0.18	-0.047	-0.001		0.002	0.18	0.047	0.001
zn_im-1_shch3-3_P2	aNZnS	1	10	11	x	116.7	116.8	110.6	114.4	115.7	aNZnS	a								0.1	-6.1	-2.3	-1		0.1	6.1	2.3	1
zn_im-1_shch3-3_P2	aNZnS	1	10	13	x	108.9	109.6	106	113	113.7	aNZnS	a								0.7	-2.9	4.1	4.8		0.7	2.9	4.1	4.8
zn_im-1_shch3-3_P2	aNZnS	1	10	15	x	108	107.7	103	110.2	111.3	aNZnS	a								-0.3	-5	2.2	3.3		0.3	5	2.2	3.3
zn_im-1_shch3-3_P2	aSZnS	11	10	13	x	108.3	107.9	110.7	103.8	104.8	aSZnS	a								-0.4	2.4	-4.5	-3.5		0.4	2.4	4.5	3.5
zn_im-1_shch3-3_P2	aSZnS	11	10	15	x	103.7	103.8	111.8	110.3	106.3	aSZnS	a								0.1	8.1	6.6	2.6		0.1	8.1	6.6	2.6
zn_im-1_shch3-3_P2	aSZnS	13	10	15	x	111.1	111	114.3	104.5	104	aSZnS	a								-0.1	3.2	-6.6	-7.1		0.1	3.2	6.6	7.1
zn_im-1_shch3-2_sch3-1_P1	rZnN	10	1	x	x	2.05	2.05	1.961	1.978	2.014	rZnN	r								0	-0.089	-0.072	-0.036		0	0.089	0.072	0.036
zn_im-1_shch3-2_sch3-1_P1	rZnS	10	11	x	x	2.234	2.232	2.197	2.245	2.241	rZnS	r								-0.002	-0.037	0.011	0.007		0.002	0.037	0.011	0.007
zn_im-1_shch3-2_sch3-1_P1	rZnS	10	12	x	x	2.537	2.537	2.284	2.513	2.58	rZnS	r								0	-0.253	-0.024	0.043		0	0.253	0.024	0.043
zn_im-1_shch3-2_sch3-1_P1	rZnS	10	14	x	x	2.527	2.532	2.291	2.477	2.557	rZnS	r								0.005	-0.236	-0.05	0.03		0.005	0.236	0.05	0.03
zn_im-1_shch3-2_sch3-1_P1	aNZnS	1	10	11	x	123.4	124.1	103.3	127.9	133.1	aNZnS	a								0.7	-20.1	4.5	9.7		0.7	20.1	4.5	9.7
zn_im-1_shch3-2_sch3-1_P1	aNZnS	1	10	12	x	101.4	101.1	102.1	105.7	103.8	aNZnS	a								-0.3	0.7	4.3	2.4		0.3	0.7	4.3	2.4
zn_im-1_shch3-2_sch3-1_P1	aNZnS	1	10	14	x	106	105.3	105.7	108.1	105.2	aNZnS	a								-0.7	-0.3	2.1	-0.8		0.7	0.3	2.1	0.8
zn_im-1_shch3-2_sch3-1_P1	aSZnS	11	10	12	x	116.8	117.2	120.7	107.7	107.5	aSZnS	a								0.4	3.9	-9.1	-9.3		0.4	3.9	9.1	9.3
zn_im-1_shch3-2_sch3-1_P1	aSZnS	11	10	14	x	107	107	114	106.5	106.2	aSZnS	a								0	7	-0.5	-0.8		0	7	0.5	0.8
zn_im-1_shch3-2_sch3-1_P1	aSZnS	12	10	14	x	99.1	98.9	109.1	96.4	94.7	aSZnS	a								-0.2	10	-2.7	-4.4		0.2	10	2.7	4.4
zn_im-1_shch3-1_sch3-2	rZnN	10	1	x	x	2.124	2.131	2.007	2.014	2.086	rZnN	r								0.007	-0.117	-0.11	-0.038		0.007	0.117	0.11	0.038
zn_im-1_shch3-1_sch3-2	rZnS	10	11	x	x	2.274	2.277	2.237	2.286	2.29	rZnS	r								0.003	-0.037	0.012	0.016		0.003	0.037	0.012	0.016
zn_im-1_shch3-1_sch3-2	rZnS	10	12	x	x	2.26	2.263	2.219	2.255	2.275	rZnS	r								0.003	-0.041	-0.005	0.015		0.003	0.041	0.005	0.015
zn_im-1_shch3-1_sch3-2	rZnS	10	13	x	x	2.855	2.828	2.388	2.749	2.776	rZnS	r								-0.027	-0.467	-0.106	-0.079		0.027	0.467	0.106	0.079
zn_im-1_shch3-1_sch3-2	aNZnS	1	10	11	x	106.2	106.3	100.3	103.8	103.7	aNZnS	a								0.1	-5.9	-2.4	-2.5		0.1	5.9	2.4	2.5
zn_im-1_shch3-1_sch3-2	aNZnS	1	10	12	x	107.1	106.6	106.3	112.7	111.5	aNZnS	a								-0.5	-0.8	5.6	4.4		0.5	0.8	5.6	4.4
zn_im-1_shch3-1_sch3-2	aNZnS	1	10	13	x	92.9	93.7	100.2	98.8	93.9	aNZnS	a								0.8	7.3	5.9	1		0.8	7.3	5.9	1
zn_im-1_shch3-1_sch3-2	aSZnS	11	10	12	x	141.4	141.6	134.6	142.1	140.6	aSZnS	a								0.2	-6.8	0.7	-0.8		0.2	6.8	0.7	0.8
zn_im-1_shch3-1_sch3-2	aSZnS	11	10	13	x	93.8	93.3	104.3	84.5	95.2	aSZnS	a								-0.5	10.5	-9.3	1.4		0.5	10.5	9.3	1.4
zn_im-1_shch3-1_sch3-2	aSZnS	12	10	13	x	103.4	103.7	106.2	99	99.5	aSZnS	a								0.3	2.8	-4.4	-3.9		0.3	2.8	4.4	3.9
zn_im-1_sch3-3_M1	rZnN	10	1	x	x	2.283	2.287	2.076	2.124	2.202	rZnN	r								0.004	-0.207	-0.159	-0.081		0.004	0.207	0.159	0.081
zn_im-1_sch3-3_M1	rZnS	10	11	x	x	2.36	2.358	2.308	2.374	2.398	rZnS	r								-0.002	-0.052	0.014	0.038		0.002	0.052	0.014	0.038
zn_im-1_sch3-3_M1	rZnS	10	12	x	x	2.356	2.359	2.294	2.364	2.382	rZnS	r								0.003	-0.062	0.008	0.026		0.003	0.062	0.008	0.026
zn_im-1_sch3-3_M1	rZnS	10	13	x	x	2.342	2.343	2.285	2.346	2.364	rZnS	r								0.001	-0.057	0.004	0.022		0.001	0.057	0.004	0.022
zn_im-1_sch3-3_M1	aNZnS	1	10	11	x	97.4	97.3	94.1	96.4	96.4	aNZnS	a								-0.1	-3.3	-1	-1		0.1	3.3	1	1
zn_im-1_sch3-3_M1	aNZnS	1	10	12	x	95.6	95.6	98.2	97.2	98.7	aNZnS	a								0	2.6	1.6	3.1		0	2.6	1.6	3.1
zn_im-1_sch3-3_M1	aNZnS	1	10	13	x	104.9	104.8	102.2	101	101.5	aNZnS	a								-0.1	-2.7	-3.9	-3.4		0.1	2.7	3.9	3.4
zn_im-1_sch3-3_M1	aSZnS	11	10	12	x	121.4	121.2	119.7	114.3	115.8	aSZnS	a								-0.2	-1.7	-7.1	-5.6		0.2	1.7	7.1	5.6
zn_im-1_sch3-3_M1	aSZnS	11	10	13	x	113.8	114.9	115.1	123.5	119.8	aSZnS	a								1.1	1.3	9.7	6		1.1	1.3	9.7	6
zn_im-1_sch3-3_M1	aSZnS	12	10	13	x	117.3	116.5	119.3	116	117.4	aSZnS	a								-0.8	2	-1.3	0.1		0.8	2	1.3	0.1
zn_im-1_h2o-3_P2	rZnN	10	1	x	x	1.949	1.946	1.913	1.923	1.946	rZnN	r								-0.003	-0.036	-0.026	-0.003		0.003	0.036	0.026	0.003
zn_im-1_h2o-3_P2	rZnO	10	11	x	x	2.033	2.041	2.028	2.082	2.048	rZnO	r								0.008	-0.005	0.049	0.015		0.008	0.005	0.049	0.015
zn_im-1_h2o-3_P2	rZnO	10	13	x	x	2.037	2.046	2.027	2.087	2.053	rZnO	r								0.009	-0.01	0.05	0.016		0.009	0.01	0.05	0.016
zn_im-1_h2o-3_P2	rZnO	10	15	x	x	2.037	2.044	2.027	2.085	2.052	rZnO	r								0.007	-0.01	0.048	0.015		0.007	0.01	0.048	0.015
zn_im-1_h2o-3_P2	aNZnO	1	10	11	x	119.3	121.2	117	118.9	119.7	aNZnO	a								1.9	-2.3	-0.4	0.4		1.9	2.3	0.4	0.4
zn_im-1_h2o-3_P2	aNZnO	1	10	13	x	118.6	119	116.7	117.1	118	aNZnO	a								0.4	-1.9	-1.5	-0.6		0.4	1.9	1.5	0.6
zn_im-1_h2o-3_P2	aNZnO	1	10	15	x	116.3	117.4	115.6	117.3	118.1	aNZnO	a								1.1	-0.7	1	1.8		1.1	0.7	1	1.8
zn_im-1_h2o-3_P2	aOZnO	11	10	13	x	98.4	97.3	101.5	99.4	98.3	aOZnO	a								-1.1	3.1	1	-0.1		1.1	3.1	1	0.1
zn_im-1_h2o-3_P2	aOZnO	11	10	15	x	101.4	99.6	102.8	101.1	99.9	aOZnO	a								-1.8	1.4	-0.3	-1.5		1.8	1.4	0.3	1.5
zn_im-1_h2o-3_P2	aOZnO	13	10	15	x	99	97.7	100.9	99.7	98.7	aOZnO	a								-1.3	1.9	0.7	-0.3		1.3	1.9	0.7	0.3
zn_im-1_h2o-2_oh-1_P1	rZnN	10	1	x	x	1.964	1.959	1.832	1.923	1.945	rZnN	r								-0.005	-0.132	-0.041	-0.019		0.005	0.132	0.041	0.019
zn_im-1_h2o-2_oh-1_P1	rZnO	10	11	x	x	1.831	1.83	1.632	1.859	1.824	rZnO	r								-0.001	-0.199	0.028	-0.007		0.001	0.199	0.028	0.007
zn_im-1_h2o-2_oh-1_P1	rZnO	10	13	x	x	2.134	2.141	2.107	2.222	2.211	rZnO	r								0.007	-0.027	0.088	0.077		0.007	0.027	0.088	0.077
zn_im-1_h2o-2_oh-1_P1	rZnO	10	15	x	x	2.157	2.169	2.106	2.219	2.215	rZnO	r								0.012	-0.051	0.062	0.058		0.012	0.051	0.062	0.058
zn_im-1_h2o-2_oh-1_P1	aNZnO	1	10	11	x	153.4	155.3	141	150.8	156.1	aNZnO	a								1.9	-12.4	-2.6	2.7		1.9	12.4	2.6	2.7
zn_im-1_h2o-2_oh-1_P1	aNZnO	1	10	13	x	107.3	107.7	111.9	108.2	106.2	aNZnO	a								0.4	4.6	0.9	-1.1		0.4	4.6	0.9	1.1
zn_im-1_h2o-2_oh-1_P1	aNZnO	1	10	15	x	106.7	105.9	104.4	109.6	106.3	aNZnO	a								-0.8	-2.3	2.9	-0.4		0.8	2.3	2.9	0.4
zn_im-1_h2o-2_oh-1_P1	aOZnO	11	10	13	x	90.6	89.1	93.6	92.8	91.5	aOZnO	a								-1.5	3	2.2	0.9		1.5	3	2.2	0.9
zn_im-1_h2o-2_oh-1_P1	aOZnO	11	10	15	x	85.7	84.9	101.6	86.4	86.6	aOZnO	a								-0.8	15.9	0.7	0.9		0.8	15.9	0.7	0.9
zn_im-1_h2o-2_oh-1_P1	aOZnO	13	10	15	x	107.2	108.2	96	98.5	97.3	aOZnO	a								1	-11.2	-8.7	-9.9		1	11.2	8.7	9.9
zn_im-2_shch3-2_P2	rZnN	10	1	x	x	2.016	2.015	1.938	1.968	1.994	rZnN	r								-0.001	-0.078	-0.048	-0.022		0.001	0.078	0.048	0.022
zn_im-2_shch3-2_P2	rZnN	10	11	x	x	2.016	2.015	1.938	1.968	1.994	rZnN	r								-0.001	-0.078	-0.048	-0.022		0.001	0.078	0.048	0.022
zn_im-2_shch3-2_P2	rZnS	10	20	x	x	2.463	2.462	2.253	2.436	2.491	rZnS	r								-0.001	-0.21	-0.027	0.028		0.001	0.21	0.027	0.028
zn_im-2_shch3-2_P2	rZnS	10	22	x	x	2.464	2.464	2.253	2.436	2.491	rZnS	r								0	-0.211	-0.028	0.027		0	0.211	0.028	0.027
zn_im-2_shch3-2_P2	aNZnN	1	10	11	x	111.4	111.2	107.8	117.3	120	aNZnN	a								-0.2	-3.6	5.9	8.6		0.2	3.6	5.9	8.6
zn_im-2_shch3-2_P2	aNZnS	1	10	20	x	117.2	118.1	115	112.4	111.4	aNZnS	a								0.9	-2.2	-4.8	-5.8		0.9	2.2	4.8	5.8
zn_im-2_shch3-2_P2	aNZnS	1	10	22	x	106.1	105.7	103.3	106.9	106.7	aNZnS	a								-0.4	-2.8	0.8	0.6		0.4	2.8	0.8	0.6
zn_im-2_shch3-2_P2	aNZnS	11	10	20	x	106.3	105.9	103.3	106.9	106.7	aNZnS	a								-0.4	-3	0.6	0.4		0.4	3	0.6	0.4
zn_im-2_shch3-2_P2	aNZnS	11	10	22	x	117.1	117.8	115	112.4	111.4	aNZnS	a								0.7	-2.1	-4.7	-5.7		0.7	2.1	4.7	5.7
zn_im-2_shch3-2_P2	aSZnS	20	10	22	x	98.6	98	112.9	99.8	98.6	aSZnS	a								-0.6	14.3	1.2	0		0.6	14.3	1.2	0
zn_im-2_sch3-2	rZnN	10	1	x	x	2.179	2.183	2.017	2.066	2.137	rZnN	r								0.004	-0.162	-0.113	-0.042		0.004	0.162	0.113	0.042
zn_im-2_sch3-2	rZnN	10	11	x	x	2.179	2.183	2.017	2.066	2.137	rZnN	r								0.004	-0.162	-0.113	-0.042		0.004	0.162	0.113	0.042
zn_im-2_sch3-2	rZnS	10	20	x	x	2.296	2.296	2.224	2.318	2.321	rZnS	r								0	-0.072	0.022	0.025		0	0.072	0.022	0.025
zn_im-2_sch3-2	rZnS	10	21	x	x	2.296	2.296	2.224	2.318	2.321	rZnS	r								0	-0.072	0.022	0.025		0	0.072	0.022	0.025
zn_im-2_sch3-2	aNZnN	1	10	11	x	97.3	96.9	105.1	105.4	102.7	aNZnN	a								-0.4	7.8	8.1	5.4		0.4	7.8	8.1	5.4
zn_im-2_sch3-2	aNZnS	1	10	20	x	102.4	102.1	99.7	100.3	100.8	aNZnS	a								-0.3	-2.7	-2.1	-1.6		0.3	2.7	2.1	1.6
zn_im-2_sch3-2	aNZnS	1	10	21	x	112.5	112.5	105.4	109.8	110	aNZnS	a								0	-7.1	-2.7	-2.5		0	7.1	2.7	2.5
zn_im-2_sch3-2	aNZnS	11	10	20	x	112.5	112.5	105.4	109.7	110	aNZnS	a								0	-7.1	-2.8	-2.5		0	7.1	2.8	2.5
zn_im-2_sch3-2	aNZnS	11	10	21	x	102.4	102.1	99.7	100.3	100.8	aNZnS	a								-0.3	-2.7	-2.1	-1.6		0.3	2.7	2.1	1.6
zn_im-2_sch3-2	aSZnS	20	10	21	x	126.2	127	138.2	129.6	129.8	aSZnS	a								0.8	12	3.4	3.6		0.8	12	3.4	3.6
zn_im-2_shch3-1_sch3-1_P1	rZnN	10	1	x	x	2.072	2.073	1.965	1.997	2.046	rZnN	r								0.001	-0.107	-0.075	-0.026		0.001	0.107	0.075	0.026
zn_im-2_shch3-1_sch3-1_P1	rZnN	10	11	x	x	2.057	2.056	1.956	1.992	2.034	rZnN	r								-0.001	-0.101	-0.065	-0.023		0.001	0.101	0.065	0.023
zn_im-2_shch3-1_sch3-1_P1	rZnS	10	20	x	x	2.24	2.241	2.195	2.258	2.256	rZnS	r								0.001	-0.045	0.018	0.016		0.001	0.045	0.018	0.016
zn_im-2_shch3-1_sch3-1_P1	rZnS	10	21	x	x	2.6	2.605	2.276	2.577	2.639	rZnS	r								0.005	-0.324	-0.023	0.039		0.005	0.324	0.023	0.039
zn_im-2_shch3-1_sch3-1_P1	aNZnN	1	10	11	x	107.3	107.1	107.6	114.7	112.4	aNZnN	a								-0.2	0.3	7.4	5.1		0.2	0.3	7.4	5.1
zn_im-2_shch3-1_sch3-1_P1	aNZnS	1	10	20	x	109.6	109.7	106.9	108.2	110.2	aNZnS	a								0.1	-2.7	-1.4	0.6		0.1	2.7	1.4	0.6
zn_im-2_shch3-1_sch3-1_P1	aNZnS	1	10	21	x	100.7	99.8	107.2	102.5	100.6	aNZnS	a								-0.9	6.5	1.8	-0.1		0.9	6.5	1.8	0.1
zn_im-2_shch3-1_sch3-1_P1	aNZnS	11	10	20	x	125.3	126.9	116	123	125.8	aNZnS	a								1.6	-9.3	-2.3	0.5		1.6	9.3	2.3	0.5
zn_im-2_shch3-1_sch3-1_P1	aNZnS	11	10	21	x	100.5	100.2	103.9	101.7	100.2	aNZnS	a								-0.3	3.4	1.2	-0.3		0.3	3.4	1.2	0.3
zn_im-2_shch3-1_sch3-1_P1	aSZnS	20	10	21	x	110.4	109.6	114.7	103.8	103.4	aSZnS	a								-0.8	4.3	-6.6	-7		0.8	4.3	6.6	7
zn_im-2_h2o-2_P2	rZnN	10	1	x	x	1.972	1.969	1.909	1.936	1.964	rZnN	r								-0.003	-0.063	-0.036	-0.008		0.003	0.063	0.036	0.008
zn_im-2_h2o-2_P2	rZnN	10	11	x	x	1.975	1.972	1.91	1.939	1.967	rZnN	r								-0.003	-0.065	-0.036	-0.008		0.003	0.065	0.036	0.008
zn_im-2_h2o-2_P2	rZnO	10	20	x	x	2.087	2.098	2.051	2.154	2.124	rZnO	r								0.011	-0.036	0.067	0.037		0.011	0.036	0.067	0.037
zn_im-2_h2o-2_P2	rZnO	10	22	x	x	2.087	2.099	2.053	2.151	2.122	rZnO	r								0.012	-0.034	0.064	0.035		0.012	0.034	0.064	0.035
zn_im-2_h2o-2_P2	aNZnN	1	10	11	x	127.2	127.8	129.5	130.8	131.9	aNZnN	a								0.6	2.3	3.6	4.7		0.6	2.3	3.6	4.7
zn_im-2_h2o-2_P2	aNZnO	1	10	20	x	106.2	105.8	106.1	106.3	105.8	aNZnO	a								-0.4	-0.1	0.1	-0.4		0.4	0.1	0.1	0.4
zn_im-2_h2o-2_P2	aNZnO	1	10	22	x	110.1	110.2	108.6	109.2	108.4	aNZnO	a								0.1	-1.5	-0.9	-1.7		0.1	1.5	0.9	1.7
zn_im-2_h2o-2_P2	aNZnO	11	10	20	x	107.8	108.2	105	105.6	105.8	aNZnO	a								0.4	-2.8	-2.2	-2		0.4	2.8	2.2	2
zn_im-2_h2o-2_P2	aNZnO	11	10	22	x	105.2	105	105.5	105.6	105.3	aNZnO	a								-0.2	0.3	0.4	0.1		0.2	0.3	0.4	0.1
zn_im-2_h2o-2_P2	aOZnO	20	10	22	x	95.9	95	97.6	92.6	92.7	aOZnO	a								-0.9	1.7	-3.3	-3.2		0.9	1.7	3.3	3.2
zn_im-2_h2o-1_oh-1_P1	rZnN	10	1	x	x	2.024	2.022	1.874	1.954	2.02	rZnN	r								-0.002	-0.15	-0.07	-0.004		0.002	0.15	0.07	0.004
zn_im-2_h2o-1_oh-1_P1	rZnN	10	11	x	x	2.005	2.002	1.866	1.947	1.999	rZnN	r								-0.003	-0.139	-0.058	-0.006		0.003	0.139	0.058	0.006
zn_im-2_h2o-1_oh-1_P1	rZnO	10	20	x	x	1.87	1.87	1.649	1.959	1.875	rZnO	r								0	-0.221	0.089	0.005		0	0.221	0.089	0.005
zn_im-2_h2o-1_oh-1_P1	rZnO	10	21	x	x	2.213	2.224	2.137	2.26	2.243	rZnO	r								0.011	-0.076	0.047	0.03		0.011	0.076	0.047	0.03
zn_im-2_h2o-1_oh-1_P1	aNZnN	1	10	11	x	116.8	117.6	118.5	131.3	122	aNZnN	a								0.8	1.7	14.5	5.2		0.8	1.7	14.5	5.2
zn_im-2_h2o-1_oh-1_P1	aNZnO	1	10	20	x	106.5	105.8	113.8	99.6	106.5	aNZnO	a								-0.7	7.3	-6.9	0		0.7	7.3	6.9	0
zn_im-2_h2o-1_oh-1_P1	aNZnO	1	10	21	x	111.7	111.7	108.3	105.8	104.2	aNZnO	a								0	-3.4	-5.9	-7.5		0	3.4	5.9	7.5
zn_im-2_h2o-1_oh-1_P1	aNZnO	11	10	20	x	133.1	133.6	121.7	125.6	129	aNZnO	a								0.5	-11.4	-7.5	-4.1		0.5	11.4	7.5	4.1
zn_im-2_h2o-1_oh-1_P1	aNZnO	11	10	21	x	99.7	98.8	100.2	101.6	100.2	aNZnO	a								-0.9	0.5	1.9	0.5		0.9	0.5	1.9	0.5
zn_im-2_h2o-1_oh-1_P1	aOZnO	20	10	21	x	79.4	78.8	86	77.1	81.2	aOZnO	a								-0.6	6.6	-2.3	1.8		0.6	6.6	2.3	1.8
zn_im-2_ch3coo-2	rZnN	10	1	x	x	2.073	2.072	1.955	1.988	2.065	rZnN	r								-0.001	-0.118	-0.085	-0.008		0.001	0.118	0.085	0.008
zn_im-2_ch3coo-2	rZnN	10	11	x	x	2.073	2.072	1.947	1.988	2.065	rZnN	r								-0.001	-0.126	-0.085	-0.008		0.001	0.126	0.085	0.008
zn_im-2_ch3coo-2	rZnO	10	21	x	x	1.956	1.961	1.908	2.081	1.981	rZnO	r								0.005	-0.048	0.125	0.025		0.005	0.048	0.125	0.025
zn_im-2_ch3coo-2	rZnO	10	28	x	x	1.956	1.961	1.954	2.081	1.981	rZnO	r								0.005	-0.002	0.125	0.025		0.005	0.002	0.125	0.025
zn_im-2_ch3coo-2	aNZnN	1	10	11	x	104.5	104	111.3	108.9	104.6	aNZnN	a								-0.5	6.8	4.4	0.1		0.5	6.8	4.4	0.1
zn_im-2_ch3coo-2	aNZnO	1	10	21	x	109.8	110.2	105.9	108.9	109.4	aNZnO	a								0.4	-3.9	-0.9	-0.4		0.4	3.9	0.9	0.4
zn_im-2_ch3coo-2	aNZnO	1	10	28	x	112.5	112.9	106.1	110.3	111	aNZnO	a								0.4	-6.4	-2.2	-1.5		0.4	6.4	2.2	1.5
zn_im-2_ch3coo-2	aNZnO	11	10	21	x	112.5	112.9	115.5	110.3	111.1	aNZnO	a								0.4	3	-2.2	-1.4		0.4	3	2.2	1.4
zn_im-2_ch3coo-2	aNZnO	11	10	28	x	109.8	110.2	105	108.9	109.5	aNZnO	a								0.4	-4.8	-0.9	-0.3		0.4	4.8	0.9	0.3
zn_im-2_ch3coo-2	aOZnO	21	10	28	x	107.8	106.9	112.8	109.6	111.1	aOZnO	a								-0.9	5	1.8	3.3		0.9	5	1.8	3.3
zn_im-3_shch3-1_P2	rZnN	10	1	x	x	2.026	2.024	1.944	1.98	2.012	rZnN	r								-0.002	-0.082	-0.046	-0.014		0.002	0.082	0.046	0.014
zn_im-3_shch3-1_P2	rZnN	10	11	x	x	2.026	2.025	1.938	1.988	2.018	rZnN	r								-0.001	-0.088	-0.038	-0.008		0.001	0.088	0.038	0.008
zn_im-3_shch3-1_P2	rZnN	10	20	x	x	2.026	2.025	1.945	1.982	2.016	rZnN	r								-0.001	-0.081	-0.044	-0.01		0.001	0.081	0.044	0.01
zn_im-3_shch3-1_P2	rZnS	10	29	x	x	2.483	2.485	2.237	2.472	2.532	rZnS	r								0.002	-0.246	-0.011	0.049		0.002	0.246	0.011	0.049
zn_im-3_shch3-1_P2	aNZnN	1	10	11	x	110.9	110.9	108.9	111.1	112.2	aNZnN	a								0	-2	0.2	1.3		0	2	0.2	1.3
zn_im-3_shch3-1_P2	aNZnN	1	10	20	x	110.6	110.4	108.7	115	115.4	aNZnN	a								-0.2	-1.9	4.4	4.8		0.2	1.9	4.4	4.8
zn_im-3_shch3-1_P2	aNZnN	11	10	20	x	112.5	112.5	106.7	115	115.2	aNZnN	a								0	-5.8	2.5	2.7		0	5.8	2.5	2.7
zn_im-3_shch3-1_P2	aNZnS	1	10	29	x	106.1	106.3	110.1	103.3	102.5	aNZnS	a								0.2	4	-2.8	-3.6		0.2	4	2.8	3.6
zn_im-3_shch3-1_P2	aNZnS	11	10	29	x	101	100.4	114.1	99.2	99.9	aNZnS	a								-0.6	13.1	-1.8	-1.1		0.6	13.1	1.8	1.1
zn_im-3_shch3-1_P2	aNZnS	20	10	29	x	115.2	115.7	108.2	111.4	109.7	aNZnS	a								0.5	-7	-3.8	-5.5		0.5	7	3.8	5.5
zn_im-3_sch3-1_P1	rZnN	10	1	x	x	2.079	2.078	1.966	2.022	2.071	rZnN	r								-0.001	-0.113	-0.057	-0.008		0.001	0.113	0.057	0.008
zn_im-3_sch3-1_P1	rZnN	10	11	x	x	2.09	2.09	1.968	2.013	2.061	rZnN	r								0	-0.122	-0.077	-0.029		0	0.122	0.077	0.029
zn_im-3_sch3-1_P1	rZnN	10	20	x	x	2.102	2.1	1.977	2.013	2.061	rZnN	r								-0.002	-0.125	-0.089	-0.041		0.002	0.125	0.089	0.041
zn_im-3_sch3-1_P1	rZnS	10	29	x	x	2.257	2.258	2.192	2.304	2.301	rZnS	r								0.001	-0.065	0.047	0.044		0.001	0.065	0.047	0.044
zn_im-3_sch3-1_P1	aNZnN	1	10	11	x	104.6	104.2	107.7	112.2	110.6	aNZnN	a								-0.4	3.1	7.6	6		0.4	3.1	7.6	6
zn_im-3_sch3-1_P1	aNZnN	1	10	20	x	103.5	103.7	106.6	110.5	109.2	aNZnN	a								0.2	3.1	7	5.7		0.2	3.1	7	5.7
zn_im-3_sch3-1_P1	aNZnN	11	10	20	x	105.7	106.1	106.5	111.3	109.7	aNZnN	a								0.4	0.8	5.6	4		0.4	0.8	5.6	4
zn_im-3_sch3-1_P1	aNZnS	1	10	29	x	121.8	122.1	117.3	107.3	108.5	aNZnS	a								0.3	-4.5	-14.5	-13.3		0.3	4.5	14.5	13.3
zn_im-3_sch3-1_P1	aNZnS	11	10	29	x	109.4	109.4	111.4	111.5	113.6	aNZnS	a								0	2	2.1	4.2		0	2	2.1	4.2
zn_im-3_sch3-1_P1	aNZnS	20	10	29	x	110.6	110.3	106.7	103.7	105.1	aNZnS	a								-0.3	-3.9	-6.9	-5.5		0.3	3.9	6.9	5.5
zn_im-3_h2o-1_P2	rZnN	10	1	x	x	2.004	2.002	1.925	1.969	2.004	rZnN	r								-0.002	-0.079	-0.035	0		0.002	0.079	0.035	0
zn_im-3_h2o-1_P2	rZnN	10	11	x	x	2.005	2.003	1.926	1.969	2.003	rZnN	r								-0.002	-0.079	-0.036	-0.002		0.002	0.079	0.036	0.002
zn_im-3_h2o-1_P2	rZnN	10	20	x	x	2.01	2.008	1.926	1.973	2.006	rZnN	r								-0.002	-0.084	-0.037	-0.004		0.002	0.084	0.037	0.004
zn_im-3_h2o-1_P2	rZnO	10	29	x	x	2.139	2.152	2.088	2.207	2.171	rZnO	r								0.013	-0.051	0.068	0.032		0.013	0.051	0.068	0.032
zn_im-3_h2o-1_P2	aNZnN	1	10	11	x	118.2	118.1	117.5	117.7	117.7	aNZnN	a								-0.1	-0.7	-0.5	-0.5		0.1	0.7	0.5	0.5
zn_im-3_h2o-1_P2	aNZnN	1	10	20	x	113.1	113.4	114.7	117.9	117.7	aNZnN	a								0.3	1.6	4.8	4.6		0.3	1.6	4.8	4.6
zn_im-3_h2o-1_P2	aNZnN	11	10	20	x	114.1	114.3	114.9	114	114.2	aNZnN	a								0.2	0.8	-0.1	0.1		0.2	0.8	0.1	0.1
zn_im-3_h2o-1_P2	aNZnO	1	10	29	x	104.2	104.5	103.6	100.7	100.4	aNZnO	a								0.3	-0.6	-3.5	-3.8		0.3	0.6	3.5	3.8
zn_im-3_h2o-1_P2	aNZnO	11	10	29	x	101.8	101.6	102.1	101.4	101	aNZnO	a								-0.2	0.3	-0.4	-0.8		0.2	0.3	0.4	0.8
zn_im-3_h2o-1_P2	aNZnO	20	10	29	x	102.9	102.1	100.7	100.5	101.2	aNZnO	a								-0.8	-2.2	-2.4	-1.7		0.8	2.2	2.4	1.7
zn_im-3_oh-1_P1	rZnN	10	1	x	x	2.056	2.054	1.903	1.991	2.054	rZnN	r								-0.002	-0.153	-0.065	-0.002		0.002	0.153	0.065	0.002
zn_im-3_oh-1_P1	rZnN	10	11	x	x	2.072	2.071	1.903	1.994	2.061	rZnN	r								-0.001	-0.169	-0.078	-0.011		0.001	0.169	0.078	0.011
zn_im-3_oh-1_P1	rZnN	10	20	x	x	2.075	2.073	1.903	1.993	2.05	rZnN	r								-0.002	-0.172	-0.082	-0.025		0.002	0.172	0.082	0.025
zn_im-3_oh-1_P1	rZnO	10	29	x	x	1.876	1.877	1.667	2.008	1.902	rZnO	r								0.001	-0.209	0.132	0.026		0.001	0.209	0.132	0.026
zn_im-3_oh-1_P1	aNZnN	1	10	11	x	107.9	107.7	111.2	118.1	113.1	aNZnN	a								-0.2	3.3	10.2	5.2		0.2	3.3	10.2	5.2
zn_im-3_oh-1_P1	aNZnN	1	10	20	x	108.9	108.7	111.2	116.5	112.4	aNZnN	a								-0.2	2.3	7.6	3.5		0.2	2.3	7.6	3.5
zn_im-3_oh-1_P1	aNZnN	11	10	20	x	110.3	110.9	111.1	112.6	110.3	aNZnN	a								0.6	0.8	2.3	0		0.6	0.8	2.3	0
zn_im-3_oh-1_P1	aNZnO	1	10	29	x	125.8	126.8	107.7	113.8	115.2	aNZnO	a								1	-18.1	-12	-10.6		1	18.1	12	10.6
zn_im-3_oh-1_P1	aNZnO	11	10	29	x	102.6	101.8	107.7	96.6	105.6	aNZnO	a								-0.8	5.1	-6	3		0.8	5.1	6	3
zn_im-3_oh-1_P1	aNZnO	20	10	29	x	100.7	100.3	107.7	95	99.3	aNZnO	a								-0.4	7	-5.7	-1.4		0.4	7	5.7	1.4
zn_im-3_ch3coo-1_P1	rZnN	10	1	x	x	2.08	2.085	1.923	1.99	2.068	rZnN	r								0.005	-0.157	-0.09	-0.012		0.005	0.157	0.09	0.012
zn_im-3_ch3coo-1_P1	rZnN	10	11	x	x	2.05	2.049	1.933	1.985	2.04	rZnN	r								-0.001	-0.117	-0.065	-0.01		0.001	0.117	0.065	0.01
zn_im-3_ch3coo-1_P1	rZnN	10	20	x	x	2.05	2.049	1.933	1.984	2.04	rZnN	r								-0.001	-0.117	-0.066	-0.01		0.001	0.117	0.066	0.01
zn_im-3_ch3coo-1_P1	rZnO	10	30	x	x	1.979	1.994	1.929	2.112	2.011	rZnO	r								0.015	-0.05	0.133	0.032		0.015	0.05	0.133	0.032
zn_im-3_ch3coo-1_P1	aNZnN	1	10	11	x	107.5	106.8	115.9	115.3	109.8	aNZnN	a								-0.7	8.4	7.8	2.3		0.7	8.4	7.8	2.3
zn_im-3_ch3coo-1_P1	aNZnN	1	10	20	x	107.5	106.8	115.9	115.4	109.9	aNZnN	a								-0.7	8.4	7.9	2.4		0.7	8.4	7.9	2.4
zn_im-3_ch3coo-1_P1	aNZnN	11	10	20	x	112	113	109.8	113.8	112.9	aNZnN	a								1	-2.2	1.8	0.9		1	2.2	1.8	0.9
zn_im-3_ch3coo-1_P1	aNZnO	1	10	30	x	96.4	95.5	98.6	94.7	97.1	aNZnO	a								-0.9	2.2	-1.7	0.7		0.9	2.2	1.7	0.7
zn_im-3_ch3coo-1_P1	aNZnO	11	10	30	x	115.7	116.1	107.7	107.6	113	aNZnO	a								0.4	-8	-8.1	-2.7		0.4	8	8.1	2.7
zn_im-3_ch3coo-1_P1	aNZnO	20	10	30	x	115.7	116.1	107.7	107.6	113	aNZnO	a								0.4	-8	-8.1	-2.7		0.4	8	8.1	2.7
zn_im-1_h2o-1_shch3-2_P2	rZnN	10	1	x	x	1.99	1.989	1.92	1.95	1.975	rZnN	r								-0.001	-0.07	-0.04	-0.015		0.001	0.07	0.04	0.015
zn_im-1_h2o-1_shch3-2_P2	rZnO	10	23	x	x	2.105	2.116	2.034	2.151	2.112	rZnO	r								0.011	-0.071	0.046	0.007		0.011	0.071	0.046	0.007
zn_im-1_h2o-1_shch3-2_P2	rZnS	10	11	x	x	2.421	2.42	2.225	2.366	2.415	rZnS	r								-0.001	-0.196	-0.055	-0.006		0.001	0.196	0.055	0.006
zn_im-1_h2o-1_shch3-2_P2	rZnS	10	13	x	x	2.422	2.419	2.233	2.381	2.426	rZnS	r								-0.003	-0.189	-0.041	0.004		0.003	0.189	0.041	0.004
zn_im-1_h2o-1_shch3-2_P2	aNZnO	1	10	23	x	102.6	102.5	101.9	106.1	107.3	aNZnO	a								-0.1	-0.7	3.5	4.7		0.1	0.7	3.5	4.7
zn_im-1_h2o-1_shch3-2_P2	aNZnS	1	10	11	x	113.6	113.5	113.1	118.6	118.7	aNZnS	a								-0.1	-0.5	5	5.1		0.1	0.5	5	5.1
zn_im-1_h2o-1_shch3-2_P2	aNZnS	1	10	13	x	119.2	119.6	111.4	117.2	118.3	aNZnS	a								0.4	-7.8	-2	-0.9		0.4	7.8	2	0.9
zn_im-1_h2o-1_shch3-2_P2	aOZnS	23	10	11	x	108.8	108.6	100.5	104.1	103.6	aOZnS	a								-0.2	-8.3	-4.7	-5.2		0.2	8.3	4.7	5.2
zn_im-1_h2o-1_shch3-2_P2	aOZnS	23	10	13	x	98.5	97.9	96.9	97.7	97.8	aOZnS	a								-0.6	-1.6	-0.8	-0.7		0.6	1.6	0.8	0.7
zn_im-1_h2o-1_shch3-2_P2	aSZnS	11	10	13	x	112	112.4	127.1	109.8	107.9	aSZnS	a								0.4	15.1	-2.2	-4.1		0.4	15.1	2.2	4.1
zn_im-1_h2o-1_shch3-1_sch3-1_P1	rZnN	10	1	x	x	2.03	2.029	1.941	1.966	1.998	rZnN	r								-0.001	-0.089	-0.064	-0.032		0.001	0.089	0.064	0.032
zn_im-1_h2o-1_shch3-1_sch3-1_P1	rZnO	10	22	x	x	2.24	2.247	2.113	2.229	2.209	rZnO	r								0.007	-0.127	-0.011	-0.031		0.007	0.127	0.011	0.031
zn_im-1_h2o-1_shch3-1_sch3-1_P1	rZnS	10	11	x	x	2.499	2.506	2.237	2.505	2.599	rZnS	r								0.007	-0.262	0.006	0.1		0.007	0.262	0.006	0.1
zn_im-1_h2o-1_shch3-1_sch3-1_P1	rZnS	10	13	x	x	2.214	2.213	2.171	2.223	2.222	rZnS	r								-0.001	-0.043	0.009	0.008		0.001	0.043	0.009	0.008
zn_im-1_h2o-1_shch3-1_sch3-1_P1	aNZnO	1	10	22	x	95.5	94.7	97.3	101.8	100.2	aNZnO	a								-0.8	1.8	6.3	4.7		0.8	1.8	6.3	4.7
zn_im-1_h2o-1_shch3-1_sch3-1_P1	aNZnS	1	10	11	x	105.2	104.6	108.7	108.3	104.3	aNZnS	a								-0.6	3.5	3.1	-0.9		0.6	3.5	3.1	0.9
zn_im-1_h2o-1_shch3-1_sch3-1_P1	aNZnS	1	10	13	x	122.4	123.2	114.1	126.7	133.8	aNZnS	a								0.8	-8.3	4.3	11.4		0.8	8.3	4.3	11.4
zn_im-1_h2o-1_shch3-1_sch3-1_P1	aOZnS	22	10	11	x	97	96.4	100.1	95.4	93	aOZnS	a								-0.6	3.1	-1.6	-4		0.6	3.1	1.6	4
zn_im-1_h2o-1_shch3-1_sch3-1_P1	aOZnS	22	10	13	x	103.4	104	93.9	109.9	109.4	aOZnS	a								0.6	-9.5	6.5	6		0.6	9.5	6.5	6
zn_im-1_h2o-1_shch3-1_sch3-1_P1	aSZnS	11	10	13	x	125.1	125.2	132.6	110	108.6	aSZnS	a								0.1	7.5	-15.1	-16.5		0.1	7.5	15.1	16.5
zn_im-1_h2o-1_sch3-2	rZnN	10	1	x	x	2.121	2.13	1.985	2.012	2.073	rZnN	r								0.009	-0.136	-0.109	-0.048		0.009	0.136	0.109	0.048
zn_im-1_h2o-1_sch3-2	rZnO	10	21	x	x	2.472	2.409	2.148	2.375	2.331	rZnO	r								-0.063	-0.324	-0.097	-0.141		0.063	0.324	0.097	0.141
zn_im-1_h2o-1_sch3-2	rZnS	10	11	x	x	2.291	2.298	2.202	2.276	2.294	rZnS	r								0.007	-0.089	-0.015	0.003		0.007	0.089	0.015	0.003
zn_im-1_h2o-1_sch3-2	rZnS	10	12	x	x	2.241	2.246	2.193	2.262	2.277	rZnS	r								0.005	-0.048	0.021	0.036		0.005	0.048	0.021	0.036
zn_im-1_h2o-1_sch3-2	aNZnO	1	10	21	x	99.4	99.9	100.2	94.8	95	aNZnO	a								0.5	0.8	-4.6	-4.4		0.5	0.8	4.6	4.4
zn_im-1_h2o-1_sch3-2	aNZnS	1	10	11	x	102.4	101.5	104.3	105.2	105.1	aNZnS	a								-0.9	1.9	2.8	2.7		0.9	1.9	2.8	2.7
zn_im-1_h2o-1_sch3-2	aNZnS	1	10	12	x	106.8	106.3	109.6	113.2	113.3	aNZnS	a								-0.5	2.8	6.4	6.5		0.5	2.8	6.4	6.5
zn_im-1_h2o-1_sch3-2	aOZnS	21	10	12	x	107.3	107.3	92	94.6	94.8	aOZnS	a								0	-15.3	-12.7	-12.5		0	15.3	12.7	12.5
zn_im-1_h2o-1_sch3-2	aOZnS	21	10	13	x	94.5	95.4	109.1	97.7	99.6	aOZnS	a								0.9	14.6	3.2	5.1		0.9	14.6	3.2	5.1
zn_im-1_h2o-1_sch3-2	aSZnS	12	10	13	x	114.2	114.9	114	107.1	107.2	aSZnS	a								0.7	-0.2	-7.1	-7		0.7	0.2	7.1	7
zn_im-1_oh-1_shch3-2_P1	rZnN	10	1	x	x	2.028	2.025	1.85	1.969	1.994	rZnN	r								-0.003	-0.178	-0.059	-0.034		0.003	0.178	0.059	0.034
zn_im-1_oh-1_shch3-2_P1	rZnO	10	23	x	x	1.845	1.843	1.587	1.911	1.84	rZnO	r								-0.002	-0.258	0.066	-0.005		0.002	0.258	0.066	0.005
zn_im-1_oh-1_shch3-2_P1	rZnS	10	11	x	x	2.522	2.523	2.104	2.459	2.567	rZnS	r								0.001	-0.418	-0.063	0.045		0.001	0.418	0.063	0.045
zn_im-1_oh-1_shch3-2_P1	rZnS	10	13	x	x	2.5	2.506	2.101	2.455	2.57	rZnS	r								0.006	-0.399	-0.045	0.07		0.006	0.399	0.045	0.07
zn_im-1_oh-1_shch3-2_P1	aNZnO	1	10	23	x	128.8	130.8	104.4	127.7	138.8	aNZnO	a								2	-24.4	-1.1	10		2	24.4	1.1	10
zn_im-1_oh-1_shch3-2_P1	aNZnS	1	10	11	x	105.7	105.6	113.1	111.4	107	aNZnS	a								-0.1	7.4	5.7	1.3		0.1	7.4	5.7	1.3
zn_im-1_oh-1_shch3-2_P1	aNZnS	1	10	13	x	106.6	106.5	107.1	112.3	106.1	aNZnS	a								-0.1	0.5	5.7	-0.5		0.1	0.5	5.7	0.5
zn_im-1_oh-1_shch3-2_P1	aOZnS	23	10	11	x	106.1	104.6	97.6	98.8	98.6	aOZnS	a								-1.5	-8.5	-7.3	-7.5		1.5	8.5	7.3	7.5
zn_im-1_oh-1_shch3-2_P1	aOZnS	23	10	13	x	98.7	98.1	107.8	98.5	100.3	aOZnS	a								-0.6	9.1	-0.2	1.6		0.6	9.1	0.2	1.6
zn_im-1_oh-1_shch3-2_P1	aSZnS	11	10	13	x	110.2	110.3	124.6	105.4	100.1	aSZnS	a								0.1	14.4	-4.8	-10.1		0.1	14.4	4.8	10.1
zn_im-1_oh-1_shch3-1_sch3-1	rZnN	10	1	x	x	2.123	2.124	1.966	2.023	2.108	rZnN	r								0.001	-0.157	-0.1	-0.015		0.001	0.157	0.1	0.015
zn_im-1_oh-1_shch3-1_sch3-1	rZnO	10	21	x	x	1.871	1.872	1.624	1.926	1.866	rZnO	r								0.001	-0.247	0.055	-0.005		0.001	0.247	0.055	0.005
zn_im-1_oh-1_shch3-1_sch3-1	rZnS	10	11	x	x	2.871	2.865	2.202	2.799	2.778	rZnS	r								-0.006	-0.669	-0.072	-0.093		0.006	0.669	0.072	0.093
zn_im-1_oh-1_shch3-1_sch3-1	rZnS	10	12	x	x	2.244	2.246	2.156	2.257	2.28	rZnS	r								0.002	-0.088	0.013	0.036		0.002	0.088	0.013	0.036
zn_im-1_oh-1_shch3-1_sch3-1	aNZnO	1	10	21	x	99.6	99.2	102.9	108.4	109.7	aNZnO	a								-0.4	3.3	8.8	10.1		0.4	3.3	8.8	10.1
zn_im-1_oh-1_shch3-1_sch3-1	aNZnS	1	10	11	x	99.7	100.2	109.3	90.7	90.9	aNZnS	a								0.5	9.6	-9	-8.8		0.5	9.6	9	8.8
zn_im-1_oh-1_shch3-1_sch3-1	aNZnS	1	10	12	x	105.2	105.4	102.7	105.1	102.2	aNZnS	a								0.2	-2.5	-0.1	-3		0.2	2.5	0.1	3
zn_im-1_oh-1_shch3-1_sch3-1	aOZnS	21	10	11	x	85.4	85.3	96.4	91.4	91	aOZnS	a								-0.1	11	6	5.6		0.1	11	6	5.6
zn_im-1_oh-1_shch3-1_sch3-1	aOZnS	21	10	12	x	149.9	150.1	129.3	142	144.1	aOZnS	a								0.2	-20.6	-7.9	-5.8		0.2	20.6	7.9	5.8
zn_im-1_oh-1_shch3-1_sch3-1	aSZnS	11	10	12	x	106.5	106.4	115	105.8	105	aSZnS	a								-0.1	8.5	-0.7	-1.5		0.1	8.5	0.7	1.5
zn_h2o-1_shch3-3_P2	rZnO	1	20	x	x	2.096	2.106	2.01	2.132	2.093	rZnO	r								0.01	-0.086	0.036	-0.003		0.01	0.086	0.036	0.003
zn_h2o-1_shch3-3_P2	rZnS	1	2	x	x	2.414	2.412	2.26	2.367	2.406	rZnS	r								-0.002	-0.154	-0.047	-0.008		0.002	0.154	0.047	0.008
zn_h2o-1_shch3-3_P2	rZnS	1	3	x	x	2.413	2.411	2.253	2.362	2.4	rZnS	r								-0.002	-0.16	-0.051	-0.013		0.002	0.16	0.051	0.013
zn_h2o-1_shch3-3_P2	rZnS	1	4	x	x	2.42	2.417	2.265	2.369	2.406	rZnS	r								-0.003	-0.155	-0.051	-0.014		0.003	0.155	0.051	0.014
zn_h2o-1_shch3-3_P2	aOZnS	20	1	2	x	100.4	100	94.8	100.8	101.4	aOZnS	a								-0.4	-5.6	0.4	1		0.4	5.6	0.4	1
zn_h2o-1_shch3-3_P2	aOZnS	20	1	3	x	98.5	98.6	94.9	100.6	101.1	aOZnS	a								0.1	-3.6	2.1	2.6		0.1	3.6	2.1	2.6
zn_h2o-1_shch3-3_P2	aOZnS	20	1	4	x	109.9	110.1	104.1	106.2	106.7	aOZnS	a								0.2	-5.8	-3.7	-3.2		0.2	5.8	3.7	3.2
zn_h2o-1_shch3-3_P2	aSZnS	2	1	3	x	124.7	125.4	124.2	122.9	122.3	aSZnS	a								0.7	-0.5	-1.8	-2.4		0.7	0.5	1.8	2.4
zn_h2o-1_shch3-3_P2	aSZnS	2	1	4	x	110.3	110	116.2	111.4	111.1	aSZnS	a								-0.3	5.9	1.1	0.8		0.3	5.9	1.1	0.8
zn_h2o-1_shch3-3_P2	aSZnS	3	1	4	x	110.9	110.8	114.1	112.1	111.9	aSZnS	a								-0.1	3.2	1.2	1		0.1	3.2	1.2	1
zn_h2o-1_shch3-2_sch3-1_P1	rZnO	1	18	x	x	2.185	2.188	2.063	2.217	2.164	rZnO	r								0.003	-0.122	0.032	-0.021		0.003	0.122	0.032	0.021
zn_h2o-1_shch3-2_sch3-1_P1	rZnS	1	2	x	x	2.463	2.472	2.259	2.411	2.501	rZnS	r								0.009	-0.204	-0.052	0.038		0.009	0.204	0.052	0.038
zn_h2o-1_shch3-2_sch3-1_P1	rZnS	1	3	x	x	2.214	2.212	2.181	2.217	2.22	rZnS	r								-0.002	-0.033	0.003	0.006		0.002	0.033	0.003	0.006
zn_h2o-1_shch3-2_sch3-1_P1	rZnS	1	4	x	x	2.475	2.479	2.274	2.422	2.493	rZnS	r								0.004	-0.201	-0.053	0.018		0.004	0.201	0.053	0.018
zn_h2o-1_shch3-2_sch3-1_P1	aOZnS	18	1	2	x	97.9	97.1	100.7	96.8	95	aOZnS	a								-0.8	2.8	-1.1	-2.9		0.8	2.8	1.1	2.9
zn_h2o-1_shch3-2_sch3-1_P1	aOZnS	18	1	3	x	104.2	109.3	89.3	108.5	114.1	aOZnS	a								5.1	-14.9	4.3	9.9		5.1	14.9	4.3	9.9
zn_h2o-1_shch3-2_sch3-1_P1	aOZnS	18	1	4	x	95.3	95.8	96.6	92.8	96.1	aOZnS	a								0.5	1.3	-2.5	0.8		0.5	1.3	2.5	0.8
zn_h2o-1_shch3-2_sch3-1_P1	aSZnS	2	1	3	x	131.2	130.1	127.3	129.9	126.6	aSZnS	a								-1.1	-3.9	-1.3	-4.6		1.1	3.9	1.3	4.6
zn_h2o-1_shch3-2_sch3-1_P1	aSZnS	2	1	4	x	105.7	104.8	113.2	110	105.2	aSZnS	a								-0.9	7.5	4.3	-0.5		0.9	7.5	4.3	0.5
zn_h2o-1_shch3-2_sch3-1_P1	aSZnS	3	1	4	x	114.7	113.4	116.8	111.1	114.2	aSZnS	a								-1.3	2.1	-3.6	-0.5		1.3	2.1	3.6	0.5
zn_h2o-1_shch3-1_sch3-2	rZnO	1	18	x	x	2.377	2.338	2.119	2.253	2.274	rZnO	r								-0.039	-0.258	-0.124	-0.103		0.039	0.258	0.124	0.103
zn_h2o-1_shch3-1_sch3-2	rZnS	1	2	x	x	2.656	2.693	2.324	2.833	2.752	rZnS	r								0.037	-0.332	0.177	0.096		0.037	0.332	0.177	0.096
zn_h2o-1_shch3-1_sch3-2	rZnS	1	3	x	x	2.235	2.239	2.205	2.227	2.244	rZnS	r								0.004	-0.03	-0.008	0.009		0.004	0.03	0.008	0.009
zn_h2o-1_shch3-1_sch3-2	rZnS	1	4	x	x	2.266	2.266	2.206	2.228	2.254	rZnS	r								0	-0.06	-0.038	-0.012		0	0.06	0.038	0.012
zn_h2o-1_shch3-1_sch3-2	aOZnS	18	1	2	x	95.9	95.1	94	77.7	83.5	aOZnS	a								-0.8	-1.9	-18.2	-12.4		0.8	1.9	18.2	12.4
zn_h2o-1_shch3-1_sch3-2	aOZnS	18	1	3	x	109.8	108.3	94.6	101.9	107.2	aOZnS	a								-1.5	-15.2	-7.9	-2.6		1.5	15.2	7.9	2.6
zn_h2o-1_shch3-1_sch3-2	aOZnS	18	1	4	x	86	87.6	94.2	99.6	92.6	aOZnS	a								1.6	8.2	13.6	6.6		1.6	8.2	13.6	6.6
zn_h2o-1_shch3-1_sch3-2	aSZnS	2	1	3	x	100.9	100.7	110	96.7	97.1	aSZnS	a								-0.2	9.1	-4.2	-3.8		0.2	9.1	4.2	3.8
zn_h2o-1_shch3-1_sch3-2	aSZnS	2	1	4	x	100	98.8	109.3	94.7	98	aSZnS	a								-1.2	9.3	-5.3	-2		1.2	9.3	5.3	2
zn_h2o-1_shch3-1_sch3-2	aSZnS	3	1	4	x	152.2	153.4	138.9	157.3	156.3	aSZnS	a								1.2	-13.3	5.1	4.1		1.2	13.3	5.1	4.1
zn_oh-1_shch3-3_P1	rZnO	1	20	x	x	1.837	1.837	1.569	1.891	1.834	rZnO	r								0	-0.268	0.054	-0.003		0	0.268	0.054	0.003
zn_oh-1_shch3-3_P1	rZnS	1	2	x	x	2.484	2.485	2.101	2.429	2.498	rZnS	r								0.001	-0.383	-0.055	0.014		0.001	0.383	0.055	0.014
zn_oh-1_shch3-3_P1	rZnS	1	3	x	x	2.464	2.461	2.108	2.399	2.479	rZnS	r								-0.003	-0.356	-0.065	0.015		0.003	0.356	0.065	0.015
zn_oh-1_shch3-3_P1	rZnS	1	4	x	x	2.494	2.492	2.112	2.418	2.496	rZnS	r								-0.002	-0.382	-0.076	0.002		0.002	0.382	0.076	0.002
zn_oh-1_shch3-3_P1	aOZnS	20	1	2	x	103.7	103.3	102.3	100.1	102.4	aOZnS	a								-0.4	-1.4	-3.6	-1.3		0.4	1.4	3.6	1.3
zn_oh-1_shch3-3_P1	aOZnS	20	1	3	x	121.5	123.2	96.1	122.5	124.5	aOZnS	a								1.7	-25.4	1	3		1.7	25.4	1	3
zn_oh-1_shch3-3_P1	aOZnS	20	1	4	x	110.1	108.4	103.4	102.6	111.4	aOZnS	a								-1.7	-6.7	-7.5	1.3		1.7	6.7	7.5	1.3
zn_oh-1_shch3-3_P1	aSZnS	2	1	3	x	112.2	112	124.4	113.3	109.8	aSZnS	a								-0.2	12.2	1.1	-2.4		0.2	12.2	1.1	2.4
zn_oh-1_shch3-3_P1	aSZnS	2	1	4	x	106.5	107	115.8	107	103.8	aSZnS	a								0.5	9.3	0.5	-2.7		0.5	9.3	0.5	2.7
zn_oh-1_shch3-3_P1	aSZnS	3	1	4	x	102.1	102	109.9	110	103.4	aSZnS	a								-0.1	7.8	7.9	1.3		0.1	7.8	7.9	1.3
zn_oh-1_shch3-2_sch3-1	rZnO	1	19	x	x	1.85	1.849	1.61	1.895	1.836	rZnO	r								-0.001	-0.24	0.045	-0.014		0.001	0.24	0.045	0.014
zn_oh-1_shch3-2_sch3-1	rZnS	1	2	x	x	2.752	2.795	2.214	2.719	2.762	rZnS	r								0.043	-0.538	-0.033	0.01		0.043	0.538	0.033	0.01
zn_oh-1_shch3-2_sch3-1	rZnS	1	3	x	x	2.731	2.725	2.197	2.633	2.752	rZnS	r								-0.006	-0.534	-0.098	0.021		0.006	0.534	0.098	0.021
zn_oh-1_shch3-2_sch3-1	rZnS	1	4	x	x	2.228	2.225	2.158	2.218	2.235	rZnS	r								-0.003	-0.07	-0.01	0.007		0.003	0.07	0.01	0.007
zn_oh-1_shch3-2_sch3-1	aOZnS	19	1	2	x	85.4	83.9	98.9	78.8	91.4	aOZnS	a								-1.5	13.5	-6.6	6		1.5	13.5	6.6	6
zn_oh-1_shch3-2_sch3-1	aOZnS	19	1	3	x	99.7	98	90	102.4	97.2	aOZnS	a								-1.7	-9.7	2.7	-2.5		1.7	9.7	2.7	2.5
zn_oh-1_shch3-2_sch3-1	aOZnS	19	1	4	x	155.8	157.1	126.2	156	161.5	aOZnS	a								1.3	-29.6	0.2	5.7		1.3	29.6	0.2	5.7
zn_oh-1_shch3-2_sch3-1	aSZnS	2	1	3	x	103.5	103.8	120.5	81.6	88.2	aSZnS	a								0.3	17	-21.9	-15.3		0.3	17	21.9	15.3
zn_oh-1_shch3-2_sch3-1	aSZnS	2	1	4	x	108	107.8	107.6	112.9	101.8	aSZnS	a								-0.2	-0.4	4.9	-6.2		0.2	0.4	4.9	6.2
zn_oh-1_shch3-2_sch3-1	aSZnS	3	1	4	x	96.7	98.1	113.4	100.2	96.1	aSZnS	a								1.4	16.7	3.5	-0.6		1.4	16.7	3.5	0.6
zn_im-2_h2o-1_ch3coo-1_P1	rZnN	10	1	x	x	2.021	2.017	1.935	1.952	2.001	rZnN	r								-0.004	-0.086	-0.069	-0.02		0.004	0.086	0.069	0.02
zn_im-2_h2o-1_ch3coo-1_P1	rZnN	10	11	x	x	2.027	2.025	1.941	1.958	2.014	rZnN	r								-0.002	-0.086	-0.069	-0.013		0.002	0.086	0.069	0.013
zn_im-2_h2o-1_ch3coo-1_P1	rZnO	10	21	x	x	2.06	2.064	2.195	2.196	2.099	rZnO	r								0.004	0.135	0.136	0.039		0.004	0.135	0.136	0.039
zn_im-2_h2o-1_ch3coo-1_P1	rZnO	10	27	x	x	2.281	2.283	2.204	2.343	2.354	rZnO	r								0.002	-0.077	0.062	0.073		0.002	0.077	0.062	0.073
zn_im-2_h2o-1_ch3coo-1_P1	aNZnN	1	10	11	x	117.7	118.5	119.9	128.9	124.1	aNZnN	a								0.8	2.2	11.2	6.4		0.8	2.2	11.2	6.4
zn_im-2_h2o-1_ch3coo-1_P1	aNZnO	1	10	21	x	116.7	116.2	117.6	113.6	116.4	aNZnO	a								-0.5	0.9	-3.1	-0.3		0.5	0.9	3.1	0.3
zn_im-2_h2o-1_ch3coo-1_P1	aNZnO	1	10	27	x	94.8	94.4	97.7	94.2	92.9	aNZnO	a								-0.4	2.9	-0.6	-1.9		0.4	2.9	0.6	1.9
zn_im-2_h2o-1_ch3coo-1_P1	aNZnO	11	10	21	x	125.5	125.2	122.4	117.4	119.4	aNZnO	a								-0.3	-3.1	-8.1	-6.1		0.3	3.1	8.1	6.1
zn_im-2_h2o-1_ch3coo-1_P1	aNZnO	11	10	27	x	101.4	101.9	103.6	103.8	98.5	aNZnO	a								0.5	2.2	2.4	-2.9		0.5	2.2	2.4	2.9
zn_im-2_h2o-1_ch3coo-1_P1	aOZnO	21	10	27	x	78.3	78.1	67.5	72.2	74.6	aOZnO	a								-0.2	-10.8	-6.1	-3.7		0.2	10.8	6.1	3.7
zn_im-2_oh-1_ch3coo-1	rZnN	10	1	x	x	2.104	2.102	1.931	2.001	2.09	rZnN	r								-0.002	-0.173	-0.103	-0.014		0.002	0.173	0.103	0.014
zn_im-2_oh-1_ch3coo-1	rZnN	10	11	x	x	2.098	2.096	1.926	2.004	2.094	rZnN	r								-0.002	-0.172	-0.094	-0.004		0.002	0.172	0.094	0.004
zn_im-2_oh-1_ch3coo-1	rZnO	10	21	x	x	1.961	1.966	1.95	2.111	1.994	rZnO	r								0.005	-0.011	0.15	0.033		0.005	0.011	0.15	0.033
zn_im-2_oh-1_ch3coo-1	rZnO	10	27	x	x	1.894	1.895	1.723	1.975	1.905	rZnO	r								0.001	-0.171	0.081	0.011		0.001	0.171	0.081	0.011
zn_im-2_oh-1_ch3coo-1	aNZnN	1	10	11	x	105.3	105.4	110.4	113.6	105.9	aNZnN	a								0.1	5.1	8.3	0.6		0.1	5.1	8.3	0.6
zn_im-2_oh-1_ch3coo-1	aNZnO	1	10	21	x	109.6	109.7	103.9	106.4	108.9	aNZnO	a								0.1	-5.7	-3.2	-0.7		0.1	5.7	3.2	0.7
zn_im-2_oh-1_ch3coo-1	aNZnO	1	10	27	x	98	97.5	106.7	96.5	99	aNZnO	a								-0.5	8.7	-1.5	1		0.5	8.7	1.5	1
zn_im-2_oh-1_ch3coo-1	aNZnO	11	10	21	x	109.5	109.7	104.8	105.2	107.4	aNZnO	a								0.2	-4.7	-4.3	-2.1		0.2	4.7	4.3	2.1
zn_im-2_oh-1_ch3coo-1	aNZnO	11	10	27	x	103.9	103.4	112.4	111.7	108.2	aNZnO	a								-0.5	8.5	7.8	4.3		0.5	8.5	7.8	4.3
zn_im-2_oh-1_ch3coo-1	aOZnO	21	10	27	x	128.2	128.6	118.2	123.3	125.7	aOZnO	a								0.4	-10	-4.9	-2.5		0.4	10	4.9	2.5
zn_im-2-dep_P1	rZnN	1	2	x	x	1.902	1.901	1.829	1.867	1.888	rZnN	r								-0.001	-0.073	-0.035	-0.014		0.001	0.073	0.035	0.014
zn_im-2-dep_P1	rZnN	1	11	x	x	1.815	1.814	1.767	1.785	1.794	rZnN	r								-0.001	-0.048	-0.03	-0.021		0.001	0.048	0.03	0.021
zn_im-2-dep_P1	aNZnN	2	1	11	x	178.9	178.8	178.8	178.9	179.3	aNZnN	a								-0.1	-0.1	0	0.4		0.1	0.1	0	0.4
zn_im-3-dep_P1	rZnN	10	1	x	x	1.999	1.999	1.891	1.961	2.004	rZnN	r								0	-0.108	-0.038	0.005		0	0.108	0.038	0.005
zn_im-3-dep_P1	rZnN	10	11	x	x	1.993	1.99	1.892	1.963	2.006	rZnN	r								-0.003	-0.101	-0.03	0.013		0.003	0.101	0.03	0.013
zn_im-3-dep_P1	rZnN	10	20	x	x	1.88	1.88	1.801	1.855	1.87	rZnN	r								0	-0.079	-0.025	-0.01		0	0.079	0.025	0.01
zn_im-3-dep_P1	aNZnN	1	10	11	x	116.5	117.6	118	116.7	113.4	aNZnN	a								1.1	1.5	0.2	-3.1		1.1	1.5	0.2	3.1
zn_im-3-dep_P1	aNZnN	1	10	20	x	120.4	119.3	121	122.1	123.7	aNZnN	a								-1.1	0.6	1.7	3.3		1.1	0.6	1.7	3.3
zn_im-3-dep_P1	aNZnN	11	10	20	x	123	123.1	121	121.2	122.8	aNZnN	a								0.1	-2	-1.8	-0.2		0.1	2	1.8	0.2
zn_im-1-dep_shch3-3_P1	rZnN	9	1	x	x	1.91	1.908	1.82	1.882	1.889	rZnN	r								-0.002	-0.09	-0.028	-0.021		0.002	0.09	0.028	0.021
zn_im-1-dep_shch3-3_P1	rZnS	9	10	x	x	2.485	2.484	2.224	2.475	2.513	rZnS	r								-0.001	-0.261	-0.01	0.028		0.001	0.261	0.01	0.028
zn_im-1-dep_shch3-3_P1	rZnS	9	12	x	x	2.465	2.463	2.215	2.404	2.481	rZnS	r								-0.002	-0.25	-0.061	0.016		0.002	0.25	0.061	0.016
zn_im-1-dep_shch3-3_P1	rZnS	9	14	x	x	2.477	2.474	2.225	2.419	2.504	rZnS	r								-0.003	-0.252	-0.058	0.027		0.003	0.252	0.058	0.027
zn_im-1-dep_shch3-3_P1	aNZnS	10	9	1	x	113.1	112.8	104.5	105.7	114.4	aNZnS	a								-0.3	-8.6	-7.4	1.3		0.3	8.6	7.4	1.3
zn_im-1-dep_shch3-3_P1	aNZnS	12	9	1	x	117.3	117.4	109.5	116.7	118.6	aNZnS	a								0.1	-7.8	-0.6	1.3		0.1	7.8	0.6	1.3
zn_im-1-dep_shch3-3_P1	aNZnS	14	9	1	x	111.1	111.4	105.3	115.1	116	aNZnS	a								0.3	-5.8	4	4.9		0.3	5.8	4	4.9
zn_im-1-dep_shch3-3_P1	aSZnS	10	9	12	x	103.9	104.1	112.5	104.8	101.8	aSZnS	a								0.2	8.6	0.9	-2.1		0.2	8.6	0.9	2.1
zn_im-1-dep_shch3-3_P1	aSZnS	10	9	14	x	104.1	103.9	112.6	104.2	100.4	aSZnS	a								-0.2	8.5	0.1	-3.7		0.2	8.5	0.1	3.7
zn_im-1-dep_shch3-3_P1	aSZnS	12	9	14	x	106.2	106.1	111.9	108.9	103.1	aSZnS	a								-0.1	5.7	2.7	-3.1		0.1	5.7	2.7	3.1
zn_im-1-dep_h2o-3_P1	rZnN	9	1	x	x	1.87	1.867	1.864	1.852	1.862	rZnN	r								-0.003	-0.006	-0.018	-0.008		0.003	0.006	0.018	0.008
zn_im-1-dep_h2o-3_P1	rZnO	9	10	x	x	2.084	2.093	2.068	2.162	2.127	rZnO	r								0.009	-0.016	0.078	0.043		0.009	0.016	0.078	0.043
zn_im-1-dep_h2o-3_P1	rZnO	9	12	x	x	2.08	2.088	2.061	2.145	2.114	rZnO	r								0.008	-0.019	0.065	0.034		0.008	0.019	0.065	0.034
zn_im-1-dep_h2o-3_P1	rZnO	9	14	x	x	2.07	2.078	2.053	2.1	2.078	rZnO	r								0.008	-0.017	0.03	0.008		0.008	0.017	0.03	0.008
zn_im-1-dep_h2o-3_P1	aNZnO	10	9	1	x	120	120.6	117	118.8	120.5	aNZnO	a								0.6	-3	-1.2	0.5		0.6	3	1.2	0.5
zn_im-1-dep_h2o-3_P1	aNZnO	12	9	1	x	119.8	121.3	118	118.9	121	aNZnO	a								1.5	-1.8	-0.9	1.2		1.5	1.8	0.9	1.2
zn_im-1-dep_h2o-3_P1	aNZnO	14	9	1	x	123	124.5	120.4	124.7	125.9	aNZnO	a								1.5	-2.6	1.7	2.9		1.5	2.6	1.7	2.9
zn_im-1-dep_h2o-3_P1	aOZnO	10	9	12	x	96.6	95.1	99.8	92.7	92.1	aOZnO	a								-1.5	3.2	-3.9	-4.5		1.5	3.2	3.9	4.5
zn_im-1-dep_h2o-3_P1	aOZnO	10	9	14	x	94.7	93.1	98.3	95.8	93.4	aOZnO	a								-1.6	3.6	1.1	-1.3		1.6	3.6	1.1	1.3
zn_im-1-dep_h2o-3_P1	aOZnO	12	9	14	x	96.6	94.8	99.4	99.2	95.8	aOZnO	a								-1.8	2.8	2.6	-0.8		1.8	2.8	2.6	0.8
zn_im-2-dep_h2o-2_P1	rZnN	10	1	x	x	1.985	1.978	1.887	1.926	1.957	rZnN	r								-0.007	-0.098	-0.059	-0.028		0.007	0.098	0.059	0.028
zn_im-2-dep_h2o-2_P1	rZnN	10	11	x	x	1.89	1.886	1.837	1.854	1.864	rZnN	r								-0.004	-0.053	-0.036	-0.026		0.004	0.053	0.036	0.026
zn_im-2-dep_h2o-2_P1	rZnO	10	19	x	x	2.135	2.149	2.107	2.236	2.217	rZnO	r								0.014	-0.028	0.101	0.082		0.014	0.028	0.101	0.082
zn_im-2-dep_h2o-2_P1	rZnO	10	21	x	x	2.153	2.177	2.091	2.252	2.234	rZnO	r								0.024	-0.062	0.099	0.081		0.024	0.062	0.099	0.081
zn_im-2-dep_h2o-2_P1	aNZnN	1	10	11	x	133.7	136.4	136.5	144.3	147.6	aNZnN	a								2.7	2.8	10.6	13.9		2.7	2.8	10.6	13.9
zn_im-2-dep_h2o-2_P1	aNZnO	1	10	19	x	101.6	100.5	102.5	101.7	99.9	aNZnO	a								-1.1	0.9	0.1	-1.7		1.1	0.9	0.1	1.7
zn_im-2-dep_h2o-2_P1	aNZnO	1	10	21	x	109.4	109.6	107.7	107.6	104.6	aNZnO	a								0.2	-1.7	-1.8	-4.8		0.2	1.7	1.8	4.8
zn_im-2-dep_h2o-2_P1	aNZnO	11	10	19	x	114.5	115	104.9	104.5	104	aNZnO	a								0.5	-9.6	-10	-10.5		0.5	9.6	10	10.5
zn_im-2-dep_h2o-2_P1	aNZnO	11	10	21	x	98.9	97.5	102.5	98.6	99.1	aNZnO	a								-1.4	3.6	-0.3	0.2		1.4	3.6	0.3	0.2
zn_im-2-dep_h2o-2_P1	aOZnO	19	10	21	x	90.3	86.6	95.7	84.5	84.9	aOZnO	a								-3.7	5.4	-5.8	-5.4		3.7	5.4	5.8	5.4
zn_im-2_ch3coo-1_ch3cooh-1_P1	rZnN	10	1	x	x	2.033	2.029	1.949	1.965	2.024	rZnN	r								-0.004	-0.084	-0.068	-0.009		0.004	0.084	0.068	0.009
zn_im-2_ch3coo-1_ch3cooh-1_P1	rZnN	10	11	x	x	2.034	2.031	1.948	1.967	2.023	rZnN	r								-0.003	-0.086	-0.067	-0.011		0.003	0.086	0.067	0.011
zn_im-2_ch3coo-1_ch3cooh-1_P1	rZnO	10	21	x	x	2.004	2.01	2.05	2.106	2.017	rZnO	r								0.006	0.046	0.102	0.013		0.006	0.046	0.102	0.013
zn_im-2_ch3coo-1_ch3cooh-1_P1	rZnO	10	28	x	x	2.166	2.173	2.105	2.218	2.175	rZnO	r								0.007	-0.061	0.052	0.009		0.007	0.061	0.052	0.009
zn_im-2_ch3coo-1_ch3cooh-1_P1	aNZnN	1	10	11	x	115.3	115.8	118.6	122.1	118.4	aNZnN	a								0.5	3.3	6.8	3.1		0.5	3.3	6.8	3.1
zn_im-2_ch3coo-1_ch3cooh-1_P1	aNZnO	1	10	21	x	121.7	121.6	117.3	113.5	117.6	aNZnO	a								-0.1	-4.4	-8.2	-4.1		0.1	4.4	8.2	4.1
zn_im-2_ch3coo-1_ch3cooh-1_P1	aNZnO	1	10	28	x	102.4	102.7	106.5	108.1	103.7	aNZnO	a								0.3	4.1	5.7	1.3		0.3	4.1	5.7	1.3
zn_im-2_ch3coo-1_ch3cooh-1_P1	aNZnO	11	10	21	x	118.2	117.9	115.4	111.1	115.4	aNZnO	a								-0.3	-2.8	-7.1	-2.8		0.3	2.8	7.1	2.8
zn_im-2_ch3coo-1_ch3cooh-1_P1	aNZnO	11	10	28	x	95	94.7	98.9	99.8	98.2	aNZnO	a								-0.3	3.9	4.8	3.2		0.3	3.9	4.8	3.2
zn_im-2_ch3coo-1_ch3cooh-1_P1	aOZnO	21	10	28	x	94.5	94.4	93.9	98.3	97.5	aOZnO	a								-0.1	-0.6	3.8	3		0.1	0.6	3.8	3
zn_im-3_ch3cooh-1_P2	rZnN	10	1	x	x	2.018	2.015	1.933	1.98	2.019	rZnN	r								-0.003	-0.085	-0.038	0.001		0.003	0.085	0.038	0.001
zn_im-3_ch3cooh-1_P2	rZnN	10	11	x	x	2.016	2.013	1.931	1.973	2.015	rZnN	r								-0.003	-0.085	-0.043	-0.001		0.003	0.085	0.043	0.001
zn_im-3_ch3cooh-1_P2	rZnN	10	20	x	x	2.016	2.013	1.932	1.974	2.018	rZnN	r								-0.003	-0.084	-0.042	0.002		0.003	0.084	0.042	0.002
zn_im-3_ch3cooh-1_P2	rZnO	10	30	x	x	2.067	2.077	2.041	2.185	2.09	rZnO	r								0.01	-0.026	0.118	0.023		0.01	0.026	0.118	0.023
zn_im-3_ch3cooh-1_P2	aNZnN	1	10	11	x	112.4	112.5	113.7	113.5	112.5	aNZnN	a								0.1	1.3	1.1	0.1		0.1	1.3	1.1	0.1
zn_im-3_ch3cooh-1_P2	aNZnN	1	10	20	x	110.9	111.2	112.9	113	113	aNZnN	a								0.3	2	2.1	2.1		0.3	2	2.1	2.1
zn_im-3_ch3cooh-1_P2	aNZnN	11	10	20	x	115.3	115.5	116.2	119.1	117.2	aNZnN	a								0.2	0.9	3.8	1.9		0.2	0.9	3.8	1.9
zn_im-3_ch3cooh-1_P2	aNZnO	1	10	30	x	99.7	99	99.4	96.2	99.2	aNZnO	a								-0.7	-0.3	-3.5	-0.5		0.7	0.3	3.5	0.5
zn_im-3_ch3cooh-1_P2	aNZnO	11	10	30	x	110	109.9	107.5	106.9	109.1	aNZnO	a								-0.1	-2.5	-3.1	-0.9		0.1	2.5	3.1	0.9
zn_im-3_ch3cooh-1_P2	aNZnO	20	10	30	x	107.3	107.4	105.2	104.7	103.6	aNZnO	a								0.1	-2.1	-2.6	-3.7		0.1	2.1	2.6	3.7

## Sheet: mgzn_binuclear_geom
Supporting Information for
Parameterization of DFTB3/3OB for Magnesium and Zinc for Chemical and Biological Applications
Xiya Lu, Michael Gaus, Marcus Elstner and Qiang Cui
										N = number of comparisons
Geometric properties										MAD = Mean absolute deviation
Calculated geometries (information based on xyz coordinates provided in the next sheet)										MAX = Maximal absolute deviation
(bond lengths “r” in Angstrom, angles “a” in degree)										MSE = Mean signed error
										Statistics with B3LYP/6-31+G(d,p) being the reference				Differences to B3LYP/6-31+G(d,p)			Absolute differences to B3LYP/6-31+G(d,p)
						B3LYP	DFTB3/3OB					DFTB3/3OB		DFTB3/3OB			DFTB3/3OB
molecule	property	atoms involved				6-31+G(d,p)		property	type
mg-2_atp_h2o-6_hcoo-2	rMgMg	1	2	x	x	4.883	5.015	rMgMg	r	N for bond lengths	50			0.132			0.132
mg-2_atp_h2o-6_hcoo-2	rMgO	1	4	x	x	2.054	2.094	rMgO	r	MAD for bond lengths		0.03298		0.04			0.04
mg-2_atp_h2o-6_hcoo-2	rMgO	1	10	x	x	2.043	2.067	rMgO	r	MAX for bond lengths		0.154		0.024			0.024
mg-2_atp_h2o-6_hcoo-2	rMgO	1	13	x	x	2.142	2.198	rMgO	r	MSE for bond lengths		0.00734		0.056			0.056
mg-2_atp_h2o-6_hcoo-2	rMgO	1	16	x	x	2.115	2.095	rMgO	r					-0.02			0.02
mg-2_atp_h2o-6_hcoo-2	rMgO	1	17	x	x	2.117	2.099	rMgO	r	N for bond angles	102			-0.018			0.018
mg-2_atp_h2o-6_hcoo-2	rMgO	1	33	x	x	2.158	2.128	rMgO	r	MAD for bond angles		3.07549		-0.03			0.03
mg-2_atp_h2o-6_hcoo-2	rMgO	2	14	x	x	2.123	2.134	rMgO	r	MAX for bond angles		10.5		0.011			0.011
mg-2_atp_h2o-6_hcoo-2	rMgO	2	18	x	x	2.198	2.176	rMgO	r	MSE for bond angles		-0.283333		-0.022			0.022
mg-2_atp_h2o-6_hcoo-2	rMgO	2	19	x	x	2.201	2.199	rMgO	r					-0.002			0.002
mg-2_atp_h2o-6_hcoo-2	rMgO	2	20	x	x	2.08	2.057	rMgO	r	MAD of different bond types				-0.023			0.023
mg-2_atp_h2o-6_hcoo-2	rMgO	2	21	x	x	2.052	2.045	rMgO	r	rMgO	36	0.0296944		-0.007			0.007
mg-2_atp_h2o-6_hcoo-2	rMgO	2	24	x	x	2.102	2.083	rMgO	r	rMgMg	3	0.086		-0.019			0.019
mg-2_atp_h2o-6_hcoo-2	aOMgO	4	1	10	x	92.9	95.8	aOMgO	a	rZnN	2	0.003		2.9			2.9
mg-2_atp_h2o-6_hcoo-2	aOMgO	4	1	13	x	93.9	93.6	aOMgO	a	rZnO	8	0.03725		-0.3			0.3
mg-2_atp_h2o-6_hcoo-2	aOMgO	4	1	16	x	172	170.2	aOMgO	a	rZnZn	1	0.018		-1.8			1.8
mg-2_atp_h2o-6_hcoo-2	aOMgO	4	1	17	x	88.4	89.1	aOMgO	a					0.7			0.7
mg-2_atp_h2o-6_hcoo-2	aOMgO	4	1	33	x	83.5	79.6	aOMgO	a	MAX of different bond types				-3.9			3.9
mg-2_atp_h2o-6_hcoo-2	aOMgO	10	1	13	x	87.4	88.4	aOMgO	a	rMgO	36	0.154		1			1
mg-2_atp_h2o-6_hcoo-2	aOMgO	10	1	16	x	93.3	94	aOMgO	a	rMgMg	3	0.132		0.7			0.7
mg-2_atp_h2o-6_hcoo-2	aOMgO	10	1	17	x	94.9	89.4	aOMgO	a	rZnN	2	0.005		-5.5			5.5
mg-2_atp_h2o-6_hcoo-2	aOMgO	10	1	33	x	168.3	166.7	aOMgO	a	rZnO	8	0.136		-1.6			1.6
mg-2_atp_h2o-6_hcoo-2	aOMgO	13	1	16	x	91.5	85.9	aOMgO	a	rZnZn	1	0.018		-5.6			5.6
mg-2_atp_h2o-6_hcoo-2	aOMgO	13	1	17	x	176.7	176.6	aOMgO	a					-0.1			0.1
mg-2_atp_h2o-6_hcoo-2	aOMgO	13	1	33	x	81.8	79.5	aOMgO	a	MSE of different bond types				-2.3			2.3
mg-2_atp_h2o-6_hcoo-2	aOMgO	16	1	17	x	86	91.7	aOMgO	a	rMgO	36	0.00547222		5.7			5.7
mg-2_atp_h2o-6_hcoo-2	aOMgO	16	1	33	x	91.5	90.7	aOMgO	a	rMgMg	3	0.002		-0.8			0.8
mg-2_atp_h2o-6_hcoo-2	aOMgO	17	1	33	x	96.2	102.9	aOMgO	a	rZnN	2	0.003		6.7			6.7
mg-2_atp_h2o-6_hcoo-2	aOMgO	14	2	18	x	85.3	86.1	aOMgO	a	rZnO	8	0.022		0.8			0.8
mg-2_atp_h2o-6_hcoo-2	aOMgO	14	2	19	x	87.3	81.9	aOMgO	a	rZnZn	1	-0.018		-5.4			5.4
mg-2_atp_h2o-6_hcoo-2	aOMgO	14	2	20	x	93.2	93.7	aOMgO	a					0.5			0.5
mg-2_atp_h2o-6_hcoo-2	aOMgO	14	2	21	x	169.8	166	aOMgO	a					-3.8			3.8
mg-2_atp_h2o-6_hcoo-2	aOMgO	14	2	24	x	87.5	90.4	aOMgO	a					2.9			2.9
mg-2_atp_h2o-6_hcoo-2	aOMgO	18	2	19	x	82	82.7	aOMgO	a					0.7			0.7
mg-2_atp_h2o-6_hcoo-2	aOMgO	18	2	20	x	175.3	177.9	aOMgO	a					2.6			2.6
mg-2_atp_h2o-6_hcoo-2	aOMgO	18	2	21	x	86.2	83.9	aOMgO	a					-2.3			2.3
mg-2_atp_h2o-6_hcoo-2	aOMgO	18	2	24	x	91.7	88.5	aOMgO	a					-3.2			3.2
mg-2_atp_h2o-6_hcoo-2	aOMgO	19	2	20	x	93.6	95.1	aOMgO	a					1.5			1.5
mg-2_atp_h2o-6_hcoo-2	aOMgO	19	2	21	x	86	87.2	aOMgO	a					1.2			1.2
mg-2_atp_h2o-6_hcoo-2	aOMgO	19	2	24	x	172.2	168.6	aOMgO	a					-3.6			3.6
mg-2_atp_h2o-6_hcoo-2	aOMgO	20	2	21	x	94.9	96	aOMgO	a					1.1			1.1
mg-2_atp_h2o-6_hcoo-2	aOMgO	20	2	24	x	92.6	93.7	aOMgO	a					1.1			1.1
mg-2_atp_h2o-6_hcoo-2	aOMgO	21	2	24	x	98.3	99.1	aOMgO	a					0.8			0.8
mg-2_atp_h2o-2_hcoo-3_ochnh2-1_M1	rMgMg	1	25	x	x	3.432	3.354	rMgMg	r					-0.078			0.078
mg-2_atp_h2o-2_hcoo-3_ochnh2-1_M1	rMgO	1	5	x	x	2.137	2.229	rMgO	r					0.092			0.092
mg-2_atp_h2o-2_hcoo-3_ochnh2-1_M1	rMgO	1	7	x	x	2.046	2.092	rMgO	r					0.046			0.046
mg-2_atp_h2o-2_hcoo-3_ochnh2-1_M1	rMgO	1	12	x	x	2.175	2.22	rMgO	r					0.045			0.045
mg-2_atp_h2o-2_hcoo-3_ochnh2-1_M1	rMgO	1	16	x	x	2.11	2.141	rMgO	r					0.031			0.031
mg-2_atp_h2o-2_hcoo-3_ochnh2-1_M1	rMgO	1	17	x	x	2.112	2.089	rMgO	r					-0.023			0.023
mg-2_atp_h2o-2_hcoo-3_ochnh2-1_M1	rMgO	1	20	x	x	2.136	2.117	rMgO	r					-0.019			0.019
mg-2_atp_h2o-2_hcoo-3_ochnh2-1_M1	rMgO	25	12	x	x	2.133	2.16	rMgO	r					0.027			0.027
mg-2_atp_h2o-2_hcoo-3_ochnh2-1_M1	rMgO	25	18	x	x	2.036	2.032	rMgO	r					-0.004			0.004
mg-2_atp_h2o-2_hcoo-3_ochnh2-1_M1	rMgO	25	21	x	x	2.131	2.122	rMgO	r					-0.009			0.009
mg-2_atp_h2o-2_hcoo-3_ochnh2-1_M1	rMgO	25	23	x	x	2.141	2.156	rMgO	r					0.015			0.015
mg-2_atp_h2o-2_hcoo-3_ochnh2-1_M1	rMgO	25	24	x	x	2.188	2.167	rMgO	r					-0.021			0.021
mg-2_atp_h2o-2_hcoo-3_ochnh2-1_M1	rMgO	25	33	x	x	2.165	2.131	rMgO	r					-0.034			0.034
mg-2_atp_h2o-2_hcoo-3_ochnh2-1_M1	aOMgO	5	1	7	x	89.2	90.1	aOMgO	a					0.9			0.9
mg-2_atp_h2o-2_hcoo-3_ochnh2-1_M1	aOMgO	5	1	12	x	81.1	79.7	aOMgO	a					-1.4			1.4
mg-2_atp_h2o-2_hcoo-3_ochnh2-1_M1	aOMgO	5	1	16	x	108.6	114.1	aOMgO	a					5.5			5.5
mg-2_atp_h2o-2_hcoo-3_ochnh2-1_M1	aOMgO	5	1	17	x	153	149.4	aOMgO	a					-3.6			3.6
mg-2_atp_h2o-2_hcoo-3_ochnh2-1_M1	aOMgO	5	1	20	x	82.6	80.2	aOMgO	a					-2.4			2.4
mg-2_atp_h2o-2_hcoo-3_ochnh2-1_M1	aOMgO	7	1	12	x	86.1	86.2	aOMgO	a					0.1			0.1
mg-2_atp_h2o-2_hcoo-3_ochnh2-1_M1	aOMgO	7	1	16	x	84.7	80.9	aOMgO	a					-3.8			3.8
mg-2_atp_h2o-2_hcoo-3_ochnh2-1_M1	aOMgO	7	1	17	x	108.9	111.4	aOMgO	a					2.5			2.5
mg-2_atp_h2o-2_hcoo-3_ochnh2-1_M1	aOMgO	7	1	20	x	161.2	154.5	aOMgO	a					-6.7			6.7
mg-2_atp_h2o-2_hcoo-3_ochnh2-1_M1	aOMgO	12	1	16	x	166.5	160.9	aOMgO	a					-5.6			5.6
mg-2_atp_h2o-2_hcoo-3_ochnh2-1_M1	aOMgO	12	1	17	x	80.3	80.2	aOMgO	a					-0.1			0.1
mg-2_atp_h2o-2_hcoo-3_ochnh2-1_M1	aOMgO	12	1	20	x	109.1	114.8	aOMgO	a					5.7			5.7
mg-2_atp_h2o-2_hcoo-3_ochnh2-1_M1	aOMgO	16	1	17	x	93.4	91.4	aOMgO	a					-2			2
mg-2_atp_h2o-2_hcoo-3_ochnh2-1_M1	aOMgO	16	1	20	x	82	81.7	aOMgO	a					-0.3			0.3
mg-2_atp_h2o-2_hcoo-3_ochnh2-1_M1	aOMgO	17	1	20	x	85.2	87.5	aOMgO	a					2.3			2.3
mg-2_atp_h2o-2_hcoo-3_ochnh2-1_M1	aOMgO	12	25	18	x	86.3	87	aOMgO	a					0.7			0.7
mg-2_atp_h2o-2_hcoo-3_ochnh2-1_M1	aOMgO	12	25	21	x	107.2	111.8	aOMgO	a					4.6			4.6
mg-2_atp_h2o-2_hcoo-3_ochnh2-1_M1	aOMgO	12	25	23	x	90.1	84.6	aOMgO	a					-5.5			5.5
mg-2_atp_h2o-2_hcoo-3_ochnh2-1_M1	aOMgO	12	25	24	x	170	163.2	aOMgO	a					-6.8			6.8
mg-2_atp_h2o-2_hcoo-3_ochnh2-1_M1	aOMgO	12	25	33	x	81.6	77.7	aOMgO	a					-3.9			3.9
mg-2_atp_h2o-2_hcoo-3_ochnh2-1_M1	aOMgO	18	25	21	x	94.7	94.2	aOMgO	a					-0.5			0.5
mg-2_atp_h2o-2_hcoo-3_ochnh2-1_M1	aOMgO	18	25	23	x	97.8	94.1	aOMgO	a					-3.7			3.7
mg-2_atp_h2o-2_hcoo-3_ochnh2-1_M1	aOMgO	18	25	24	x	96.9	100.3	aOMgO	a					3.4			3.4
mg-2_atp_h2o-2_hcoo-3_ochnh2-1_M1	aOMgO	18	25	33	x	165.6	162.8	aOMgO	a					-2.8			2.8
mg-2_atp_h2o-2_hcoo-3_ochnh2-1_M1	aOMgO	21	25	23	x	159.3	162	aOMgO	a					2.7			2.7
mg-2_atp_h2o-2_hcoo-3_ochnh2-1_M1	aOMgO	21	25	24	x	82	82.9	aOMgO	a					0.9			0.9
mg-2_atp_h2o-2_hcoo-3_ochnh2-1_M1	aOMgO	21	25	33	x	81.6	84.5	aOMgO	a					2.9			2.9
mg-2_atp_h2o-2_hcoo-3_ochnh2-1_M1	aOMgO	23	25	24	x	80.2	79.8	aOMgO	a					-0.4			0.4
mg-2_atp_h2o-2_hcoo-3_ochnh2-1_M1	aOMgO	23	25	33	x	90	92.2	aOMgO	a					2.2			2.2
mg-2_atp_h2o-2_hcoo-3_ochnh2-1_M1	aOMgO	24	25	33	x	96.3	96.5	aOMgO	a					0.2			0.2
mg-2_h2o-3_hcoo-3_ochnh2-1_phos-1	rMgMg	1	16	x	x	3.45	3.402	rMgMg	r					-0.048			0.048
mg-2_h2o-3_hcoo-3_ochnh2-1_phos-1	rMgO	1	2	x	x	2.113	2.144	rMgO	r					0.031			0.031
mg-2_h2o-3_hcoo-3_ochnh2-1_phos-1	rMgO	1	6	x	x	2.06	2.078	rMgO	r					0.018			0.018
mg-2_h2o-3_hcoo-3_ochnh2-1_phos-1	rMgO	1	8	x	x	2.123	2.115	rMgO	r					-0.008			0.008
mg-2_h2o-3_hcoo-3_ochnh2-1_phos-1	rMgO	1	10	x	x	2.105	2.087	rMgO	r					-0.018			0.018
mg-2_h2o-3_hcoo-3_ochnh2-1_phos-1	rMgO	1	13	x	x	2.049	2.069	rMgO	r					0.02			0.02
mg-2_h2o-3_hcoo-3_ochnh2-1_phos-1	rMgO	1	30	x	x	2.205	2.167	rMgO	r					-0.038			0.038
mg-2_h2o-3_hcoo-3_ochnh2-1_phos-1	rMgO	16	5	x	x	2.083	2.237	rMgO	r					0.154			0.154
mg-2_h2o-3_hcoo-3_ochnh2-1_phos-1	rMgO	16	6	x	x	2.109	2.132	rMgO	r					0.023			0.023
mg-2_h2o-3_hcoo-3_ochnh2-1_phos-1	rMgO	16	11	x	x	2.128	2.093	rMgO	r					-0.035			0.035
mg-2_h2o-3_hcoo-3_ochnh2-1_phos-1	rMgO	16	14	x	x	2.085	2.057	rMgO	r					-0.028			0.028
mg-2_h2o-3_hcoo-3_ochnh2-1_phos-1	rMgO	16	23	x	x	2.162	2.133	rMgO	r					-0.029			0.029
mg-2_h2o-3_hcoo-3_ochnh2-1_phos-1	rMgO	16	34	x	x	2.178	2.149	rMgO	r					-0.029			0.029
mg-2_h2o-3_hcoo-3_ochnh2-1_phos-1	aOMgO	2	1	6	x	91.6	91.6	aOMgO	a					0			0
mg-2_h2o-3_hcoo-3_ochnh2-1_phos-1	aOMgO	2	1	8	x	87.6	87	aOMgO	a					-0.6			0.6
mg-2_h2o-3_hcoo-3_ochnh2-1_phos-1	aOMgO	2	1	10	x	173.2	173.4	aOMgO	a					0.2			0.2
mg-2_h2o-3_hcoo-3_ochnh2-1_phos-1	aOMgO	2	1	13	x	91.7	87.2	aOMgO	a					-4.5			4.5
mg-2_h2o-3_hcoo-3_ochnh2-1_phos-1	aOMgO	2	1	30	x	83.7	83.2	aOMgO	a					-0.5			0.5
mg-2_h2o-3_hcoo-3_ochnh2-1_phos-1	aOMgO	6	1	8	x	166.7	168.4	aOMgO	a					1.7			1.7
mg-2_h2o-3_hcoo-3_ochnh2-1_phos-1	aOMgO	6	1	10	x	92.3	94.9	aOMgO	a					2.6			2.6
mg-2_h2o-3_hcoo-3_ochnh2-1_phos-1	aOMgO	6	1	13	x	101.6	101.9	aOMgO	a					0.3			0.3
mg-2_h2o-3_hcoo-3_ochnh2-1_phos-1	aOMgO	6	1	30	x	79	78.6	aOMgO	a					-0.4			0.4
mg-2_h2o-3_hcoo-3_ochnh2-1_phos-1	aOMgO	8	1	10	x	87.3	86.4	aOMgO	a					-0.9			0.9
mg-2_h2o-3_hcoo-3_ochnh2-1_phos-1	aOMgO	8	1	13	x	91.8	89.5	aOMgO	a					-2.3			2.3
mg-2_h2o-3_hcoo-3_ochnh2-1_phos-1	aOMgO	8	1	30	x	87.7	89.9	aOMgO	a					2.2			2.2
mg-2_h2o-3_hcoo-3_ochnh2-1_phos-1	aOMgO	10	1	13	x	92.9	92.5	aOMgO	a					-0.4			0.4
mg-2_h2o-3_hcoo-3_ochnh2-1_phos-1	aOMgO	10	1	30	x	91.6	97.1	aOMgO	a					5.5			5.5
mg-2_h2o-3_hcoo-3_ochnh2-1_phos-1	aOMgO	13	1	30	x	175.4	170.3	aOMgO	a					-5.1			5.1
mg-2_h2o-3_hcoo-3_ochnh2-1_phos-1	aOMgO	5	16	6	x	71.4	68.3	aOMgO	a					-3.1			3.1
mg-2_h2o-3_hcoo-3_ochnh2-1_phos-1	aOMgO	5	16	11	x	161.4	164.5	aOMgO	a					3.1			3.1
mg-2_h2o-3_hcoo-3_ochnh2-1_phos-1	aOMgO	5	16	14	x	100.7	96.3	aOMgO	a					-4.4			4.4
mg-2_h2o-3_hcoo-3_ochnh2-1_phos-1	aOMgO	5	16	23	x	92.2	88.8	aOMgO	a					-3.4			3.4
mg-2_h2o-3_hcoo-3_ochnh2-1_phos-1	aOMgO	5	16	34	x	82.6	74.5	aOMgO	a					-8.1			8.1
mg-2_h2o-3_hcoo-3_ochnh2-1_phos-1	aOMgO	6	16	11	x	92.8	98.1	aOMgO	a					5.3			5.3
mg-2_h2o-3_hcoo-3_ochnh2-1_phos-1	aOMgO	6	16	14	x	99.1	99.8	aOMgO	a					0.7			0.7
mg-2_h2o-3_hcoo-3_ochnh2-1_phos-1	aOMgO	6	16	23	x	106.6	99	aOMgO	a					-7.6			7.6
mg-2_h2o-3_hcoo-3_ochnh2-1_phos-1	aOMgO	6	16	34	x	152.7	142.7	aOMgO	a					-10			10
mg-2_h2o-3_hcoo-3_ochnh2-1_phos-1	aOMgO	11	16	14	x	91.3	93.3	aOMgO	a					2			2
mg-2_h2o-3_hcoo-3_ochnh2-1_phos-1	aOMgO	11	16	23	x	82.7	86	aOMgO	a					3.3			3.3
mg-2_h2o-3_hcoo-3_ochnh2-1_phos-1	aOMgO	11	16	34	x	114.2	119.2	aOMgO	a					5			5
mg-2_h2o-3_hcoo-3_ochnh2-1_phos-1	aOMgO	14	16	23	x	153.8	161	aOMgO	a					7.2			7.2
mg-2_h2o-3_hcoo-3_ochnh2-1_phos-1	aOMgO	14	16	34	x	77.2	81	aOMgO	a					3.8			3.8
mg-2_h2o-3_hcoo-3_ochnh2-1_phos-1	aOMgO	23	16	34	x	82.1	82.8	aOMgO	a					0.7			0.7
zn-2_im-2_oh-1_hcoo-3	rZnZn	1	2	x	x	3.285	3.267	rZnZn	r					-0.018			0.018
zn-2_im-2_oh-1_hcoo-3	rZnO	1	3	x	x	1.953	1.965	rZnO	r					0.012			0.012
zn-2_im-2_oh-1_hcoo-3	rZnO	1	7	x	x	2.808	2.804	rZnO	r					-0.004			0.004
zn-2_im-2_oh-1_hcoo-3	rZnO	1	8	x	x	1.993	2.032	rZnO	r					0.039			0.039
zn-2_im-2_oh-1_hcoo-3	rZnO	1	11	x	x	2.021	1.983	rZnO	r					-0.038			0.038
zn-2_im-2_oh-1_hcoo-3	rZnN	1	13	x	x	2.045	2.05	rZnN	r					0.005			0.005
zn-2_im-2_oh-1_hcoo-3	rZnO	2	3	x	x	1.968	1.988	rZnO	r					0.02			0.02
zn-2_im-2_oh-1_hcoo-3	rZnO	2	4	x	x	1.952	1.933	rZnO	r					-0.019			0.019
zn-2_im-2_oh-1_hcoo-3	rZnO	2	5	x	x	2.78	2.916	rZnO	r					0.136			0.136
zn-2_im-2_oh-1_hcoo-3	rZnO	2	10	x	x	2.056	2.086	rZnO	r					0.03			0.03
zn-2_im-2_oh-1_hcoo-3	rZnN	2	18	x	x	2.061	2.062	rZnN	r					0.001			0.001
zn-2_im-2_oh-1_hcoo-3	aOZnO	3	1	8	x	112.5	105	aOZnO	a					-7.5			7.5
zn-2_im-2_oh-1_hcoo-3	aOZnO	3	1	11	x	103	110.7	aOZnO	a					7.7			7.7
zn-2_im-2_oh-1_hcoo-3	aNZnO	13	1	3	x	116.1	110.3	aNZnO	a					-5.8			5.8
zn-2_im-2_oh-1_hcoo-3	aOZnO	8	1	11	x	106.8	113.6	aOZnO	a					6.8			6.8
zn-2_im-2_oh-1_hcoo-3	aNZnO	13	1	8	x	117.4	108.5	aNZnO	a					-8.9			8.9
zn-2_im-2_oh-1_hcoo-3	aNZnO	13	1	11	x	98.2	108.7	aNZnO	a					10.5			10.5
zn-2_im-2_oh-1_hcoo-3	aOZnO	3	2	4	x	119.5	118.5	aOZnO	a					-1			1
zn-2_im-2_oh-1_hcoo-3	aOZnO	3	2	10	x	100	102.2	aOZnO	a					2.2			2.2
zn-2_im-2_oh-1_hcoo-3	aNZnO	18	2	3	x	108.9	104.1	aNZnO	a					-4.8			4.8
zn-2_im-2_oh-1_hcoo-3	aOZnO	4	2	10	x	105.1	106.8	aOZnO	a					1.7			1.7
zn-2_im-2_oh-1_hcoo-3	aNZnO	18	2	4	x	120	124.4	aNZnO	a					4.4			4.4
zn-2_im-2_oh-1_hcoo-3	aNZnO	18	2	10	x	98.8	96.5	aNZnO	a					-2.3			2.3

## Sheet: mg_xyz
Supporting Information for
Parameterization of DFTB3/3OB for Magnesium and Zinc for Chemical and Biological Applications
Xiya Lu, Michael Gaus, Marcus Elstner and Qiang Cui
XYZ-Coordinates of the Magnesium Test Set
B3LYP/aug-cc-pVTZ optimized structures
2
mg_h-1_P1
mg	0	0	0.126092
h	0	0	-1.53071
3
mg_h-2
h	0	0	1.70086
mg	0	0	0
h	0	0	-1.70086
5
mg_ch3-1_P1
mg	0.931951	-9e-06	6.8e-05
c	-1.15158	-1.3e-05	-4e-06
h	-1.45688	-0.730014	-0.744813
h	-1.45701	1.00997	-0.259816
h	-1.45701	-0.280054	1.00455
9
mg_ch3-2
mg	0	0	0
c	0	0	2.09546
h	0	1.01539	2.50132
c	0	0	-2.09546
h	-0.879355	-0.507696	2.50132
h	0.879355	-0.507696	2.50132
h	0	1.01539	-2.50132
h	-0.879355	-0.507696	-2.50132
h	0.879355	-0.507696	-2.50132
5
mg_cn-2
mg	0	0	0
c	0	0	2.02886
c	0	0	-2.02886
n	0	0	3.18488
n	0	0	-3.18488
3
mg_cn_P1
mg	0	0	1.32996
c	0	0	-0.641482
n	0	0	-1.79741
3
mg_co-1_P2
mg	-0.017247	-1.52631	0
c	0.006475	0.679026	0
o	0.018395	1.78724	0
5
mg_co-2_P2
mg	-3e-06	-0.000629	1.8e-05
c	-2.22641	-0.000681	2e-05
o	-3.33544	-0.000707	2.1e-05
c	2.22641	-0.000576	1.6e-05
o	3.33544	-0.00055	1.5e-05
7
mg_co-3_P2
mg	0	0	0
c	0	2.26126	0
o	0	3.37135	0
c	1.95831	-1.13063	0
o	2.91967	-1.68567	0
c	-1.95831	-1.13063	0
o	-2.91967	-1.68568	0
9
mg_co-4_P2
mg	-2.5e-05	2.2e-05	-0.000105
c	-1.32956	-1.80393	0.49636
c	-1.32176	1.80793	-0.502722
c	1.32926	-0.50157	-1.80277
c	1.32203	0.497609	1.80903
o	-1.97303	-2.67725	0.736752
o	-1.96169	2.68302	-0.746101
o	1.97289	-0.744438	-2.67528
o	1.96189	0.738608	2.68484
21
mg_cp-2
mg	0	0	0.001189
c	-2.01745	1.1e-05	1.20592
c	2.01745	-1.1e-05	1.20592
c	-2.01695	-1.14687	0.372584
c	-2.01601	-0.708764	-0.975706
c	-2.01601	0.708747	-0.975719
c	-2.01695	1.14688	0.372563
c	2.01695	1.14687	0.372584
c	2.01601	0.708764	-0.975706
c	2.01601	-0.708747	-0.975719
c	2.01695	-1.14688	0.372563
h	-2.03695	2.1e-05	2.28428
h	-2.03635	-2.17242	0.70584
h	-2.03476	-1.34252	-1.84817
h	-2.03476	1.34249	-1.8482
h	-2.03635	2.17243	0.7058
h	2.03695	-2.1e-05	2.28428
h	2.03635	2.17242	0.70584
h	2.03476	1.34252	-1.84817
h	2.03476	-1.34249	-1.8482
h	2.03635	-2.17243	0.7058
15
mg_ac-2
mg	3e-06	-0.007452	-0.000215
o	1.684	-0.785461	0.783182
c	2.32994	-0.010184	0.006453
c	3.83004	-0.000633	0.001076
o	1.68594	0.765781	-0.773512
o	-1.68403	-0.787883	-0.781121
o	-1.68589	0.768405	0.770531
c	-2.32993	-0.010029	-0.006939
c	-3.83003	-0.000255	-0.001719
h	4.22679	-0.721079	0.709238
h	4.18125	1.0011	0.248548
h	4.18572	-0.225667	-1.00421
h	-4.22682	-0.723401	-0.7071
h	-4.18106	1.00055	-0.253185
h	-4.18584	-0.221258	1.00441
3
mg_oh-1_P1
Mg	0.01753	-0.733867	0
O	0.212864	1.00457	0
H	-0.390178	1.75123	0
5
mg_oh-2
mg	0	0	-0.006291
o	0.000454	1.78248	0.008731
h	0.501038	2.58774	-0.069589
o	-0.000454	-1.78248	0.008731
h	-0.501038	-2.58774	-0.069589
2
mg_o
mg	0	0	0.69559
o	0	0	-1.04904
4
mg_h2o-1_P2
mg	-0.916398	-1.1e-05	-8.4e-05
o	1.00001	6e-06	0.00031
h	1.58926	-0.781253	0.000424
h	1.58924	0.781283	0.000424
7
mg_h2o-2_P2
mg	0	-0.00052	-0.00037
o	1.93655	0.000412	0.000279
h	2.52528	-0.548237	0.552322
h	2.52508	0.54937	-0.551672
o	-1.93655	8.8e-05	0.000505
h	-2.52474	0.55296	0.5489
h	-2.52562	-0.55166	-0.548078
10
mg_h2o-3_P2
mg	-0.004561	-0.001844	0.000177
o	1.10561	-1.62295	0.068905
h	1.93714	-1.74374	0.558457
h	0.936673	-2.46874	-0.380286
h	1.64591	2.02239	-0.542721
h	0.543185	2.57835	0.396688
o	0.84204	1.77145	-0.056393
h	-2.59159	0.392333	-0.5182
h	-2.50786	-0.786559	0.48722
o	-1.96513	-0.152585	-0.011961
13
mg_h2o-4_P2
mg	0	0	0
o	-0.000827	1.60987	1.18704
o	0.000827	-1.60987	1.18704
o	1.60987	0.000827	-1.18704
o	-1.60987	-0.000827	-1.18704
h	-0.529656	1.75225	1.98732
h	0.54355	2.4058	1.08341
h	1.75225	0.529656	-1.98732
h	0.529656	-1.75225	1.98732
h	-2.4058	0.54355	-1.08341
h	2.4058	-0.54355	-1.08341
h	-0.54355	-2.4058	1.08341
h	-1.75225	-0.529656	-1.98732
16
mg_h2o-5_P2
O	-0.198733	0	2.08148
Mg	-0.397016	0	0
O	0.282219	1.91752	0
O	0.282219	-1.91752	0
O	-2.43837	0	0
O	-0.198733	0	-2.08148
H	0.608128	0	2.61584
H	-0.933509	0	2.71105
H	0.465349	2.46685	0.774742
H	0.465349	2.46685	-0.774742
H	0.465349	-2.46685	0.774742
H	0.465349	-2.46685	-0.774742
H	-3.02041	0.773721	0
H	-3.02041	-0.773721	0
H	0.608128	0	-2.61584
H	-0.933509	0	-2.71105
19
mg_h2o-6_P2
o	0	0	2.09995
mg	0	0	0
o	0	2.09995	0
o	0	-2.09995	0
o	2.09995	0	0
o	-2.09995	0	0
o	0	0	-2.09995
h	0.773723	0	2.67842
h	-0.773723	0	2.67842
h	0	2.67842	0.773723
h	0	2.67842	-0.773723
h	0	-2.67842	0.773723
h	0	-2.67842	-0.773723
h	2.67842	0.773723	0
h	2.67842	-0.773723	0
h	-2.67842	0.773723	0
h	-2.67842	-0.773723	0
h	0.773723	0	-2.67842
h	-0.773723	0	-2.67842
4
mg_nh2-1_P1
n	-1.03809	0.003618	-0.241546
mg	0.818954	-0.004428	0.0607
h	-1.54327	0.815906	0.103846
h	-1.54735	-0.814138	0.084396
7
mg_nh2-2
mg	0	0	-2.7e-05
n	8e-05	1.89387	-6.8e-05
n	-8e-05	-1.89387	-6.8e-05
h	0.574273	2.49443	0.573758
h	-0.574305	2.49444	-0.57369
h	0.574305	-2.49444	-0.57369
h	-0.574273	-2.49443	0.573758
5
mg_nh3-1_P2
mg	-0.037515	-0.000711	0.000202
n	-2.08177	-4e-05	0.000192
h	-2.49255	0.935139	-0.109708
h	-2.49296	-0.372187	0.864951
h	-2.4931	-0.562609	-0.754577
9
mg_nh3-2_P2
mg	2e-06	0.000804	-0.001009
n	-2.06723	7.3e-05	0.000194
h	-2.48351	0.930498	-0.107001
h	-2.4823	-0.372456	0.860087
h	-2.48309	-0.558477	-0.75184
h	2.48352	0.93154	-0.09604
h	2.48228	-0.382688	0.855671
h	2.48313	-0.549751	-0.758327
n	2.06724	-8.8e-05	0.000193
13
mg_nh3-3_P2
mg	-0.00228	1.8e-05	0.003098
n	-0.945493	1.88258	-0.038057
h	-0.305891	2.67287	0.069007
h	-1.6428	2.01646	0.697925
h	-1.44951	2.07761	-0.906364
h	2.53606	0.366856	0.817745
h	2.46258	-1.07622	0.092837
h	2.5525	0.27105	-0.796376
n	2.10027	-0.122201	0.03238
h	-1.06893	-2.31399	0.865719
h	-2.16433	-1.59975	-0.08494
h	-0.931007	-2.41215	-0.742503
n	-1.15917	-1.75951	0.011061
17
mg_nh3-4_P2
mg	0	0	0
n	1.24034	1.24034	1.24034
n	-1.24034	-1.24034	1.24034
n	1.24034	-1.24034	-1.24034
n	-1.24034	1.24034	-1.24034
h	1.86133	0.720376	1.86133
h	0.720376	1.86133	1.86133
h	-1.86133	-0.720376	1.86133
h	1.86133	1.86133	0.720376
h	1.86133	-0.720376	-1.86133
h	-0.720376	1.86133	-1.86133
h	-0.720376	-1.86133	1.86133
h	-1.86133	1.86133	-0.720376
h	1.86133	-1.86133	-0.720376
h	-1.86133	-1.86133	0.720376
h	-1.86133	0.720376	-1.86133
h	0.720376	-1.86133	-1.86133
21
mg_nh3-5_P2
Mg	-0.000529	0.000294	-0.01254
N	1.9112	0.00853	1.08512
H	2.72728	0.037545	0.473873
H	2.03562	0.801711	1.7125
N	0.04247	-2.25557	-0.06618
H	0.902829	-2.64878	-0.445861
H	-0.055111	-2.69734	0.847231
N	-1.90561	-0.060181	1.09492
H	-2.48495	-0.874808	0.897394
H	-1.78271	-0.075309	2.10744
N	-0.008729	0.051537	-2.21607
H	0.476434	-0.727385	-2.65901
H	-0.946713	0.027497	-2.61617
N	-0.039384	2.25595	0.041972
H	-0.793746	2.67481	-0.500705
H	-0.151892	2.64926	0.975595
H	2.06414	-0.808496	1.67444
H	0.805669	2.69802	-0.31785
H	-2.51931	0.735425	0.925541
H	-0.696407	-2.67486	-0.629428
H	0.419447	0.882157	-2.6222
25
mg_nh3-6_P2
Mg	0.000243	-0.000991	0.000234
N	2.28355	0.027879	-0.01869
H	2.71771	-0.858979	-0.267452
H	2.66883	0.694966	-0.684646
N	0.030724	-2.28336	0.047827
H	0.302783	-2.72263	-0.829567
H	0.683051	-2.65953	0.73331
N	-0.075065	-0.036843	2.28233
H	-0.74951	-0.705144	2.65043
H	0.801514	-0.289878	2.73442
N	-2.28082	0.06132	-0.071417
H	-2.72473	-0.81847	-0.327655
H	-2.72618	0.3231	0.806056
N	0.054619	2.28165	0.042473
H	-0.827087	2.72202	0.298437
H	0.727498	2.65356	0.710226
N	-0.012985	-0.051642	-2.28239
H	-0.683887	-0.716115	-2.66362
H	-0.253805	0.831826	-2.72762
H	2.71525	0.280577	0.868179
H	-0.859472	-2.71804	0.283044
H	-0.33471	0.848906	2.71223
H	-2.64092	0.730959	-0.748835
H	0.874415	-0.31504	-2.7066
H	0.308977	2.7199	-0.840716
5
mg_h-c2h1
mg	-0.015639	-1.31356	0
h	-0.042078	-3.00199	0
c	0.016054	0.710437	0
c	0.035065	1.92457	0
h	0.05172	2.9882	0
7
mg_h-c2h3
mg	-0.799061	-1.08027	0
h	-1.41949	-2.66375	0
c	-0.003754	0.8401	0
c	1.31141	1.09127	0
h	2.06221	0.304411	0
h	1.72482	2.09853	0
h	-0.63003	1.73443	0
6
mg_h-ch3
mg	-9.8e-05	-0.830165	0
h	0.000123	-2.53594	0
c	-4.1e-05	1.26012	0
h	-1.01552	1.6653	0
h	0.507796	1.66506	0.879485
h	0.507796	1.66506	-0.879485
4
mg_h-cn
mg	-0.001303	-1.27368	0
h	-0.025574	-2.95347	0
c	0.016023	0.779159	0
n	0.015553	1.93585	0
5
mg_h-nh2
mg	0	0	0.750942
h	0	0	2.44378
n	0	0	-1.14574
h	0	0.811122	-1.74791
h	0	-0.811122	-1.74791
4
mg_h-oh
mg	-0.006421	0.00013	0.691508
o	-0.041684	0.001757	-1.07612
h	-0.059598	0.002666	-2.02511
h	0.026702	-0.001553	2.37728
5
mg_h-ono
mg	0.689647	-1.29415	0
h	1.78701	-2.56585	0
o	-0.938493	-0.221767	0
n	0.006206	0.710694	0
o	-0.322487	1.85505	0
5
mg_cn-oh
mg	0.000697	0.528303	0
c	-0.00087	-1.50918	0
n	-0.007456	-2.66528	0
o	0.062305	2.28396	0
h	-0.141417	3.21145	0
2
mg_s
mg	0	0	-1.23097
s	0	0	0.921876
4
mg_h-sh
mg	0.037132	1.25773	0
s	0.043485	-1.05204	0
h	-1.30176	-1.13185	0
h	0.068269	2.9458	0
5
mg_oh-sh
Mg	0.587452	-0.031334	-0.047508
O	2.35954	-0.007996	-0.129602
H	3.23131	-0.020504	0.249604
S	-1.70788	-0.102178	-0.058793
H	-1.82514	1.24057	-0.081039
3
mg_sh-1_P1
mg	0.045889	1.31827	0
s	0.045539	-0.92725	0
h	-1.30621	-0.981733	0
5
mg_sh-2
mg	0	0	0.326207
s	0.178369	2.29024	0.357823
h	1.13783	2.304	-0.589117
s	-0.178369	-2.29024	0.357823
h	-1.13783	-2.304	-0.589117
4
mg_sh2-1_P2
mg	1.48874	-0.000222	0.018096
s	-0.973979	9.4e-05	-0.112525
h	-1.22264	-0.999276	0.779275
h	-1.22214	1.00008	0.778722
7
mg_sh2-2_P2
mg	-6e-05	0.026534	5.4e-05
s	-2.48543	-0.073767	0.099204
s	2.48533	-0.073669	-0.099129
h	2.77359	1.18219	0.328583
h	2.72736	-0.651406	1.10557
h	-2.77381	1.18229	-0.327844
h	-2.72752	-0.650921	-1.10576
10
mg_sh2-3_P2
mg	-0.059469	-0.070577	0.010369
s	1.95072	-1.59949	0.210327
s	-2.50489	-0.750191	0.045395
s	0.438988	2.40411	-0.207518
h	-0.746594	2.93117	0.178583
h	1.04558	2.63788	0.980403
h	-2.52353	-1.69972	-0.919587
h	-2.5069	-1.64041	1.06576
h	1.46967	-2.73419	-0.348997
h	2.64426	-1.23024	-0.892608
13
mg_sh2-4_P2
mg	0	0	0.090864
s	-0.009719	2.01029	-1.53165
s	-2.24038	0.122722	1.36382
s	2.24038	-0.122722	1.36382
s	0.009719	-2.01029	-1.53165
h	0.198953	3.06128	-0.708314
h	1.26296	1.98882	-1.98696
h	-2.08443	1.22471	2.13052
h	-1.26296	-1.98882	-1.98696
h	2.02944	0.735244	2.38642
h	-2.02944	-0.735244	2.38642
h	-0.198953	-3.06128	-0.708314
h	2.08443	-1.22471	2.13052
16
mg_sh2-5_P2
Mg	0.006419	-0.045523	-0.031245
H	1.00204	2.14286	2.13894
H	-0.880636	1.68809	2.5067
H	3.02693	1.19678	-0.66842
H	3.14307	-0.762137	-0.902589
H	-3.23593	0.826934	-0.336118
H	-3.08343	-1.09815	-0.749228
H	0.898459	0.503976	-3.12279
H	-0.915679	1.21506	-2.81205
H	0.975683	-2.32382	1.99367
H	-0.867851	-2.79293	1.47512
S	2.71304	0.096085	0.046015
S	0.29259	-2.51454	0.844735
S	-0.159321	2.12268	1.45131
S	-2.70035	-0.267789	0.243379
S	-0.271591	0.042288	-2.63518
19
mg_sh2-6_P2
Mg	0.072909	-0.06926	0.078864
H	3.23528	0.592129	1.11424
H	3.28966	0.486579	-0.862682
H	1.12889	-3.22727	-0.563876
H	-0.846877	-3.29585	-0.45327
H	1.05554	3.05782	-0.597982
H	-0.909157	3.1012	-0.417236
H	-0.556308	-1.11255	3.24431
H	-0.465204	0.865029	3.30111
H	-0.59866	-1.0804	-3.04223
H	-0.421911	0.884223	-3.10233
H	-3.0507	0.586735	1.0863
H	-3.11041	0.395765	-0.877576
S	0.27748	-0.146556	2.80984
S	0.13664	2.62695	0.288853
S	2.80554	-0.252153	0.155434
S	0.285449	-0.155785	-2.61755
S	-2.62113	-0.30111	0.167392
S	0.168967	-2.79949	0.280379
4
mg_ph2-1_P1
p	1.00724	0.000134	-0.115878
mg	-1.42982	-0.000286	0.001135
h	1.02568	-1.03224	0.869005
h	1.02521	1.03288	0.868633
7
mg_ph2-2
mg	0	0	0
p	0.001879	2.46563	0
p	-0.001879	-2.46563	0
h	0.984762	2.48576	1.03418
h	0.984762	2.48576	-1.03418
h	-0.984762	-2.48576	-1.03418
h	-0.984762	-2.48576	1.03418
5
mg_ph3-1_P2
p	-0.968163	-2.4e-05	4.5e-05
mg	1.57791	6e-06	-2.9e-05
h	-1.49282	-1.04589	-0.783398
h	-1.49308	1.20134	-0.513793
h	-1.49275	-0.155808	1.2975
9
mg_ph3-2_P2
p	2.56682	-0.002135	0.000288
mg	9e-06	-0.004489	0.001065
h	-3.14201	1.28044	-0.057083
h	-3.14419	-0.593468	1.13865
h	-3.14357	-0.692013	-1.08221
p	-2.5668	-0.002276	-2.9e-05
h	3.142	1.2812	-0.041262
h	3.14407	-0.606976	1.13185
h	3.1438	-0.67879	-1.09
13
mg_ph3-3_P2
p	1.26813	2.28669	-0.055263
mg	0.000757	0.000559	0.001114
h	-3.21909	-1.2828	-0.23604
h	-3.25969	0.822122	-0.84731
h	-3.20404	0.299747	1.28082
p	-2.61284	-0.046228	0.051371
h	1.116	-3.10017	-1.07279
h	2.75061	-2.12365	0.013624
h	1.119	-3.08336	1.11916
p	1.34855	-2.23983	0.016334
h	2.06767	2.51302	-1.19105
h	0.469351	3.44396	-0.014745
h	2.17399	2.50958	0.998341
17
mg_ph3-4_P2
mg	0	0	0
p	1.53479	1.53479	1.53479
p	-1.53479	-1.53479	1.53479
p	1.53479	-1.53479	-1.53479
p	-1.53479	1.53479	-1.53479
h	2.41621	0.880609	2.41621
h	0.880609	2.41621	2.41621
h	-2.41621	-0.880609	2.41621
h	2.41621	2.41621	0.880609
h	2.41621	-0.880609	-2.41621
h	-0.880609	2.41621	-2.41621
h	-0.880609	-2.41621	2.41621
h	-2.41621	2.41621	-0.880609
h	2.41621	-2.41621	-0.880609
h	-2.41621	-2.41621	0.880609
h	-2.41621	0.880609	-2.41621
h	0.880609	-2.41621	-2.41621

## Sheet: mg_xyz_large
Supporting Information for
Parameterization of DFTB3/3OB for Magnesium and Zinc for Chemical and Biological Applications
Xiya Lu, Michael Gaus, Marcus Elstner and Qiang Cui
XYZ-Coordinates of the Magnesium Large Test Set
B3LYP/aug-cc-pVTZ optimized structures
6
mg_h2o-2-dep_P1
mg	-0.146619	-0.050815	0.020289
o	1.83004	0.021551	-0.00913
h	2.37401	0.823803	0.011894
h	2.44277	-0.728151	-0.05489
o	-1.86392	0.050242	-0.021239
h	-2.80452	-0.059696	0.076187
9
mg_h2o-3-dep_P1
mg	-0.014451	-0.147059	0.002084
o	-2.01211	-0.016447	0.010008
h	-2.62326	0.731624	0.012122
h	-2.55027	-0.82139	0.014676
h	0.807959	2.52379	-0.02219
h	1.95032	1.45913	-0.018459
o	0.98826	1.57623	-0.014899
h	1.39401	-2.40784	0.011493
o	1.08451	-1.50815	0.006211
12
mg_h2o-4-dep_P1
mg	-0.032944	-0.032822	-0.130007
o	-1.29641	1.52609	-0.464312
o	-1.25733	-1.4813	0.577051
o	1.36657	0.755442	1.09094
o	1.30468	-0.766892	-1.08564
h	-2.09062	1.52164	-1.01326
h	-1.01179	2.44664	-0.394035
h	2.13043	0.370103	0.621346
h	-1.99713	-1.53863	1.19251
h	1.61867	-1.11221	-1.91622
h	1.61977	0.984949	1.99018
h	-0.986848	-2.38314	0.355853
15
mg_h2o-5-dep_P1
O	-0.74412	-1.95602	-0.056257
Mg	-0.064121	0.023566	-0.006499
O	0.823542	-0.17482	1.83196
O	1.02198	-0.115461	-1.73372
O	-1.99548	0.691222	-0.104986
O	0.847564	1.68311	0.084277
H	-0.7983	-2.52393	-0.833445
H	-0.847961	-2.52382	0.716125
H	1.3923	-0.702523	2.3994
H	1.22578	0.712905	1.67715
H	1.60011	-0.622068	-2.31049
H	1.41965	0.761218	-1.53002
H	-2.13511	1.646	-0.096999
H	-2.85833	0.265538	-0.147803
H	0.790704	2.63585	0.09431
18
mg_h2o-6-dep_P1
O	-0.36348	-0.21737	2.06574
Mg	-0.010482	-0.031382	-0.045359
O	2.04912	-0.582451	-0.069574
O	-1.99368	0.71063	0.031629
O	-0.044456	-1.94929	0.236929
O	0.541383	1.98875	-0.151511
O	-0.211196	-0.165423	-2.14024
H	-0.29573	-1.18436	1.85745
H	0.076364	-0.036721	2.90127
H	2.87565	-0.48619	0.410958
H	1.69672	-1.4965	0.0727
H	-2.42221	0.539985	0.87981
H	-2.65549	0.586384	-0.65748
H	-0.502304	-2.75649	0.009942
H	1.43192	2.35435	-0.129471
H	-0.07615	2.71183	0.004571
H	-0.116243	-1.07851	-2.43897
H	0.169534	0.397058	-2.8234
8
mg_nh3-2-dep_P1
mg	-0.142623	0.000342	-0.002279
n	1.96156	-0.000459	0.00103
h	2.36664	0.935192	-0.045145
h	2.36686	-0.508258	-0.786023
h	2.36437	-0.427319	0.835903
h	-2.58575	0.81445	-0.056658
h	-2.58598	-0.815033	0.057725
n	-1.99195	-0.000317	0.001489
12
mg_nh3-3-dep_P1
mg	0.013957	0.134346	-0.019429
n	-1.87965	-0.856615	0.010463
h	-2.06611	-1.49336	-0.761823
h	-2.59204	-0.130038	-0.0568
h	-2.10157	-1.37824	0.85621
h	1.84393	-1.80928	-0.655076
h	2.54147	-0.544961	0.084606
h	1.80774	-1.69479	0.963037
n	1.71933	-1.14783	0.108848
h	1.0233	2.53424	-0.172307
h	-0.587311	2.66482	-0.20998
n	0.168107	1.99633	-0.148977
16
mg_nh3-4-dep_P1
mg	-0.011707	-0.013483	0.120855
n	0.99514	1.91595	0.126163
n	-1.85089	0.228178	-1.01371
n	-0.448804	-0.78595	1.80919
n	1.28194	-1.39413	-0.951343
h	0.399301	2.60078	0.586911
h	1.31649	2.35374	-0.733458
h	-1.86591	0.055451	-2.01515
h	1.81186	1.83817	0.729183
h	0.149226	-1.35791	2.3909
h	2.27421	-1.29062	-0.753321
h	-2.33185	1.1143	-0.880174
h	1.21157	-1.49222	-1.96047
h	-1.26284	-0.591033	2.37708
h	-2.45377	-0.477806	-0.593113
h	1.01718	-2.29606	-0.55766
20
mg_nh3-5-dep_P1
Mg	-0.046801	-0.016079	-0.01802
N	-0.147399	1.42243	-1.31232
H	0.617832	1.8999	-1.77176
H	-0.977139	1.86816	-1.68311
N	2.23773	0.044276	-0.152871
H	2.42916	-0.065348	-1.14547
H	2.47086	1.01296	0.050149
N	0.0644	0.348086	2.16691
H	0.90877	0.036721	2.63813
H	0.048579	1.36158	2.26337
N	-0.034095	-2.15368	-0.608683
H	0.801678	-2.68434	-0.380985
H	-0.817396	-2.71821	-0.292916
N	-2.33303	-0.051763	0.095659
H	-2.93722	-0.648174	0.652727
H	-2.58387	0.90621	0.326476
H	-2.6254	-0.17003	-0.871013
H	-0.710316	0.003063	2.72614
H	2.92325	-0.523763	0.335474
H	-0.089624	-2.14311	-1.62532
24
mg_nh3-6-dep_P1
Mg	-0.0345	-0.075519	-0.028684
N	1.39646	0.237272	-1.80299
H	1.94488	0.793113	-1.14066
H	2.00507	-0.48908	-2.16672
N	1.18426	1.0759	1.10315
H	1.98105	0.788682	1.66159
N	-1.25826	1.7779	-0.599831
H	-0.947063	2.42733	0.1179
H	-1.03781	2.2204	-1.48677
N	-1.37708	-0.292399	1.84726
H	-0.661116	0.314846	2.26157
H	-2.27286	0.170928	1.96192
N	-1.41081	-1.35974	-1.28952
H	-2.22907	-1.66435	-0.770442
H	-1.76004	-0.877565	-2.11219
N	1.09649	-1.95292	0.642635
H	1.62517	-1.58106	1.42728
H	0.581375	-2.75194	0.999397
H	1.17898	0.835283	-2.5938
H	1.20108	2.08753	1.17758
H	-2.27195	1.7569	-0.545116
H	-1.4265	-1.13352	2.41321
H	1.78615	-2.33217	0.000984
H	-0.965048	-2.20411	-1.63535
6
mg_sh2-2-dep_P1
mg	-0.153208	0.257035	0.158384
s	-2.3681	0.218924	0.542778
s	2.38442	0.1895	-0.057354
h	2.70195	0.6582	1.17084
h	2.57951	-1.10449	0.283978
h	-2.65372	0.827289	-0.628925
9
mg_sh2-3-dep_P1
mg	-0.183999	-0.191202	0.014674
s	-2.11889	-1.37225	0.022979
s	2.31366	-0.875654	-0.116832
s	-0.189141	2.39766	0.122065
h	-0.215706	2.67107	-1.19986
h	-1.52828	2.50563	0.261293
h	2.57345	-0.998865	1.20251
h	2.10246	-2.19815	-0.289089
h	-1.53014	-2.57521	0.176132
12
mg_sh2-4-dep_P1
mg	0.08838	0.038299	-0.256036
s	-2.18786	-1.22694	-0.677281
s	-0.719277	2.3975	0.605369
s	1.65168	-0.066212	-1.93293
s	1.06166	-1.06801	1.93153
h	-1.64464	-2.14052	-1.50798
h	-2.27393	-2.08203	0.361575
h	-1.81146	2.58579	-0.16281
h	1.71485	-0.015977	2.46511
h	0.867746	0.431787	-2.90892
h	0.094796	3.07272	-0.232797
h	2.16174	-1.54548	1.31237
15
mg_sh2-5-dep_P1
Mg	0.170726	0.031348	-0.012389
H	-0.646938	-2.86579	0.695095
H	1.01171	-3.13328	-0.326752
H	3.0449	-0.431767	1.25252
H	3.34683	0.891734	-0.163636
H	-3.29155	-0.964889	-0.548387
H	-2.9538	0.270516	0.954951
H	1.03655	1.52848	2.28094
H	-0.511378	0.971578	-3.0843
H	-0.307668	2.48841	-1.84768
S	2.90982	-0.380127	-0.087245
S	0.445386	1.45088	-2.26543
S	-0.189039	-2.55728	-0.535001
S	-2.66615	0.213095	-0.359114
S	-0.20527	1.08762	2.01271
18
mg_sh2-6-dep_P1
Mg	0.024749	0.036813	-0.083012
H	3.29281	-0.164044	0.895363
H	3.24845	-0.339303	-1.06339
H	1.38248	-3.24461	0.579293
H	-0.586545	-3.1368	0.369947
H	0.611967	3.51847	0.580139
H	-1.29139	2.96651	0.475768
H	-0.547019	-0.972635	2.92887
H	-0.478737	0.980734	3.02762
H	-0.402626	1.10771	-3.16158
H	-0.619808	-0.836578	-3.09351
H	-2.70724	-0.315157	0.872409
S	0.359259	-0.010966	2.67166
S	-0.172028	2.80179	-0.249747
S	2.77858	0.522664	-0.14229
S	0.377556	0.045378	-2.88682
S	-2.28929	-0.25463	-0.40485
S	0.503116	-2.70535	-0.288286
8
mg_ph3-2-dep_P1
p	2.65842	-0.139253	-0.219771
mg	0.251226	0.000309	0.003816
h	-3.04269	1.26655	-0.031193
h	-3.04234	-0.567773	1.13683
h	-3.05607	-0.662666	-1.03648
p	-2.4117	0.009541	0.018911
h	2.75014	1.25604	0.062857
h	2.74991	-0.500166	1.15737
12
mg_ph3-3-dep_P1
p	1.36486	2.41694	0.358326
mg	0.18128	0.318117	0.037459
h	-3.09169	-1.25735	0.55291
h	-3.17419	0.104969	-1.11516
h	-3.17829	0.870215	0.898749
p	-2.4891	-0.065599	0.103794
h	0.913305	-2.98794	-1.23938
h	2.66643	-2.13726	-0.315706
h	1.13785	-3.04786	0.90272
p	1.26631	-2.14253	-0.169157
h	2.17787	2.15867	-0.784021
h	0.380674	3.12035	-0.395778
16
mg_ph3-4-dep_P1
mg	0.173112	-0.185444	-0.185665
p	1.51152	1.48485	1.48503
p	-1.50537	-1.50272	1.4974
p	1.42984	-1.67751	-1.67634
p	-1.50557	1.49753	-1.50275
h	2.41238	0.836803	2.35335
h	0.944189	2.40033	2.39639
h	-2.35045	-0.908706	2.45734
h	2.41713	2.34865	0.837581
h	2.29526	-0.623593	-2.09182
h	-0.88014	2.31783	-2.46275
h	-0.879439	-2.46227	2.31786
h	-2.35007	2.45768	-0.908242
h	2.29786	-2.08843	-0.622763
h	-2.44465	-2.3389	0.861672
h	-2.44552	0.861919	-2.33827
16
mg_h2o-3_ch3oh-1_P2
O	0.223324	0.468365	2.55546
Mg	0.628187	-0.691966	0.971199
O	0.230083	-2.60437	1.43267
O	2.60167	-0.514305	0.662304
H	0.752286	0.586585	3.35905
H	-0.556246	1.03449	2.66368
H	0.085472	-2.96821	2.31958
H	0.12222	-3.3477	0.819904
H	3.13329	0.296048	0.673181
H	3.22105	-1.23602	0.47398
C	-0.200115	0.657658	-1.74834
O	-0.496518	-0.207271	-0.575564
H	-1.39901	-0.539279	-0.673699
H	0.819115	1.01007	-1.62961
H	-0.291896	0.060538	-2.65026
H	-0.894989	1.49168	-1.74877
19
mg_h2o-4_ch3oh-1_P2
O	-2.29379	0.439128	-0.053208
Mg	-0.376442	-0.413632	0.039567
O	-0.228303	0.382857	1.91241
O	-0.215599	-0.009244	-1.95403
O	-1.05155	-2.33522	0.232092
H	-3.12174	-0.058767	-0.005334
H	-2.54736	1.36789	-0.148284
H	-0.921625	0.835272	2.41177
H	0.553559	0.364124	2.48063
H	-0.905517	0.333067	-2.53847
H	0.569928	-0.140851	-2.5019
H	-1.23523	-2.80701	1.05691
H	-1.23005	-2.96301	-0.482511
C	2.8188	0.029625	0.005186
O	1.63203	-0.840568	0.089639
H	1.93161	-1.75308	0.183074
H	3.40504	-0.069777	0.914639
H	3.41069	-0.249895	-0.862109
H	2.45877	1.04855	-0.099247
22
mg_h2o-5_ch3oh-1_P2
O	-0.000318	-0.067393	2.12796
Mg	0.037361	0.060038	0.022394
O	0.280782	2.14178	0.185165
O	-0.208451	-2.02554	-0.08182
O	2.1363	-0.193922	0.096785
O	-2.04676	0.305597	0.073029
H	0.752129	-0.195097	2.71986
H	-0.783991	-0.008974	2.68956
H	0.32439	2.6609	0.998603
H	0.377662	2.76688	-0.544731
H	-0.305192	-2.64093	0.656421
H	-0.252279	-2.55537	-0.888214
H	2.8027	0.500707	0.178248
H	2.61582	-1.03251	0.087938
H	-2.52604	1.14362	0.103413
H	-2.71412	-0.390299	0.016158
C	-0.762187	0.354753	-3.14796
O	0.188352	0.172509	-2.04542
H	1.07345	0.093001	-2.41963
H	-0.526782	1.26959	-3.68571
H	-0.714465	-0.501273	-3.81609
H	-1.74892	0.426227	-2.70493
17
mg_h2o-3_ch3coo-1_P1
O	-0.058052	0.291694	2.33828
Mg	0.703137	-0.507649	0.607508
O	0.602427	-2.5051	1.01341
O	2.64805	0.10187	0.711337
H	0.083145	0.287769	3.29089
H	-0.81461	0.865357	2.15233
H	0.306646	-3.04708	1.75281
H	0.670212	-3.07689	0.237193
H	3.17587	0.622392	1.32651
H	3.13091	0.054806	-0.124517
C	-0.190839	-0.051138	-1.51306
O	0.813581	-0.830126	-1.39242
O	-0.686367	0.464536	-0.453506
C	-0.786421	0.250403	-2.85069
H	-0.187377	-0.172031	-3.65069
H	-1.79486	-0.164158	-2.8886
H	-0.883009	1.32849	-2.97231
20
mg_h2o-4_ch3coo-1_P1
O	-0.746996	0.175545	1.48028
Mg	0.446009	0.133572	-0.221216
O	0.787072	2.24567	-0.339057
O	0.815193	-1.9772	-0.215668
O	2.28079	0.174519	0.767134
H	-0.648347	0.203771	2.43717
H	-1.68949	0.163017	1.26879
H	0.246288	2.94041	0.052908
H	0.943125	2.50052	-1.25811
H	0.975085	-2.28273	-1.11847
H	0.283843	-2.65538	0.216169
H	2.83693	0.959595	0.820765
H	2.84715	-0.598743	0.866186
C	-0.655897	0.064101	-2.33816
O	0.61983	0.074413	-2.26675
O	-1.32818	0.091672	-1.25894
C	-1.35283	0.019152	-3.6649
H	-0.640653	0.015134	-4.4837
H	-1.98021	-0.871301	-3.7119
H	-2.01999	0.876774	-3.7521
23
mg_h2o-5_ch3coo-1_P1
O	0.439953	-0.064662	2.08772
Mg	-0.299082	-0.189551	0.121893
O	-0.452691	1.87782	-0.245255
O	-0.519546	-2.28145	0.277314
O	1.71218	-0.024353	-0.49933
O	-2.22531	0.024612	0.98419
H	1.34403	0.196697	2.29433
H	-0.093077	0.069282	2.87884
H	-0.076769	2.64768	0.191673
H	-0.135786	1.87594	-1.18881
H	-0.207145	-3.00202	0.832661
H	-0.739223	-2.6359	-0.594646
H	1.53735	0.408529	-1.37623
H	2.40223	-0.681315	-0.631641
H	-2.67536	0.833649	0.710806
H	-2.878	-0.683497	0.943814
C	-0.441218	0.087518	-2.74261
O	0.405105	1.01375	-2.58586
O	-0.906448	-0.575882	-1.75473
C	-0.925092	-0.232814	-4.12929
H	-1.54238	0.595311	-4.48175
H	-0.077205	-0.304132	-4.80846
H	-1.51008	-1.14718	-4.14887
21
mg_h2o-2_ch3coo-2
Mg	-0.022252	0.017625	0.00894
O	1.78158	-0.482675	0.970489
C	2.40991	0.011269	-0.0163
C	3.91682	0.028561	-0.009414
O	1.76672	0.502965	-0.993269
O	-1.82603	0.517809	-0.952742
O	-1.81124	-0.467691	1.01109
C	-2.4544	0.024112	0.034143
C	-3.96132	0.007154	0.027442
H	4.30041	-0.927285	0.343136
H	4.25486	0.79012	0.695557
H	4.30876	0.25777	-0.996148
H	-4.2995	-0.756434	-0.675275
H	-4.34483	0.962026	-0.327765
H	-4.35318	-0.219372	1.01483
O	-0.010296	2.13819	0.481312
H	0.753121	2.47485	-0.004873
H	-0.788208	2.4697	0.014649
O	-0.034137	-2.10297	-0.463279
H	0.743747	-2.43432	0.00355
H	-0.797582	-2.43966	0.022835
33
mg_h2o-2_ch3coo-2_ochnh2-2
O	2.50342	-0.197703	-0.993445
O	1.36472	0.905818	1.47395
O	-0.2915	-0.646925	-2.1601
O	0.515281	1.9766	-1.1523
H	3.10241	0.536768	-0.839278
H	2.82131	-0.979165	-0.438989
H	-0.326941	2.33871	-0.72758
H	0.364978	1.95495	-2.10187
C	-2.06828	1.3693	0.455962
O	-1.65674	2.52092	0.153854
O	-1.36738	0.315919	0.392711
C	-3.50674	1.21646	0.915295
H	-3.8987	2.16021	1.28629
H	-4.11175	0.908288	0.059918
H	-3.5875	0.439393	1.67292
C	1.68599	-2.57532	0.788428
O	2.86066	-2.26172	0.519242
O	0.65301	-1.90109	0.436457
C	1.42187	-3.84743	1.57201
H	0.738514	-3.64356	2.3957
H	0.936751	-4.57728	0.920486
H	2.34948	-4.27128	1.94602
C	0.954396	1.86928	2.11291
H	0.086101	2.45525	1.78975
N	1.52732	2.29056	3.24963
H	2.3262	1.80095	3.61958
H	1.16397	3.08369	3.74668
C	-0.985673	-1.64021	-2.38395
H	-1.49291	-1.75374	-3.35039
N	-1.18739	-2.63465	-1.52391
H	-1.77415	-3.40979	-1.77411
H	-0.705698	-2.60268	-0.619971
Mg	0.534475	0.019112	-0.298693
19
mg_h2o-2_ch3oh-1_ochnh2-1_P2
O	-1.33033	0.781129	-2.02411
Mg	-0.588927	0.653818	-0.150792
O	-1.67229	-0.826221	0.687924
O	-0.709667	2.22153	0.91618
H	-2.16266	1.18676	-2.30645
H	-0.885991	0.485711	-2.83182
H	-2.18382	-1.5112	0.234132
H	-1.82858	-0.953915	1.6346
C	2.51532	0.674353	-0.639271
O	1.25263	-0.053463	-0.389845
H	1.46125	-0.987001	-0.258115
H	2.25252	1.7151	-0.799128
H	3.15779	0.575714	0.230585
H	2.98787	0.264379	-1.52686
C	-0.946182	3.40057	1.28585
H	-1.39587	4.11747	0.59701
N	-0.682005	3.85101	2.48409
H	-0.893342	4.80818	2.73133
H	-0.262591	3.26295	3.19267
24
mg_h2o-3_ch3coo-2
Mg	-0.350949	-0.188176	0.129516
O	-0.722646	1.88099	-0.397889
O	-0.362254	-2.30952	0.344196
O	-1.95334	-0.304677	1.48974
H	-1.11113	1.7603	-1.27538
H	0.034676	2.46774	-0.487805
H	0.232919	-2.75783	-0.264639
H	-1.28093	-2.53436	0.086009
H	-2.44138	0.451985	1.82361
H	-2.57378	-0.882413	0.981493
C	2.02995	0.103392	0.39723
O	1.23521	0.398353	1.34024
O	1.57285	-0.298691	-0.716436
C	3.51896	0.206306	0.61318
H	3.75214	1.04873	1.26088
H	3.85744	-0.70033	1.11846
H	4.0443	0.288589	-0.334743
C	-2.67383	-1.14394	-1.43475
O	-1.6781	-0.353531	-1.45103
O	-2.96199	-1.87571	-0.448675
C	-3.56516	-1.18081	-2.65666
H	-4.06439	-2.14297	-2.73738
H	-4.33321	-0.411733	-2.54837
H	-2.99657	-0.962721	-3.5577
30
mg_h2o-3_ch3coo-2_ochnh2-1
O	2.45276	0.619152	0.68467
O	-0.423704	1.47232	1.35805
O	1.28621	-1.31306	-1.38753
O	0.523426	1.55453	-1.36886
H	2.88196	1.47515	0.658274
H	2.6208	0.151636	1.57818
H	0.02125	2.24837	1.70703
H	-1.13593	1.7769	0.748802
H	-0.449852	1.74394	-1.34328
H	0.732576	1.25527	-2.25837
C	-2.26154	0.317192	-0.759066
O	-2.08812	1.57479	-0.766818
O	-1.35682	-0.511668	-0.464427
C	-3.63632	-0.206171	-1.11664
H	-4.35104	0.136901	-0.367515
H	-3.95113	0.212405	-2.07232
H	-3.64781	-1.29173	-1.15808
C	1.49171	-1.53837	2.56555
O	2.47217	-0.791115	2.79025
O	0.745912	-1.46643	1.53456
C	1.1441	-2.61119	3.5792
H	0.148932	-2.41421	3.97958
H	1.10412	-3.58435	3.08902
H	1.86764	-2.63334	4.38912
C	1.16078	-2.52902	-1.27006
H	0.737975	-2.97271	-0.363206
N	1.52928	-3.40244	-2.21629
H	1.4152	-4.39025	-2.07732
H	1.9388	-3.07252	-3.07519
Mg	0.553634	-0.014552	0.142575
31
mg_h2o-3_ch3coo-3_M1
Mg	-0.402893	-0.106876	-0.652708
O	-1.16773	-2.10909	-0.362831
H	-2.14272	-1.87338	-0.251316
H	-0.870959	-2.33011	0.525961
C	-0.194217	-0.70199	-3.62735
O	0.930779	-1.26102	-3.59533
O	-0.775718	-0.155052	-2.64726
C	-0.946767	-0.675041	-4.95216
H	-1.26888	0.34319	-5.17131
H	-0.330896	-1.05835	-5.76254
H	-1.84681	-1.28508	-4.85866
C	-3.32378	0.082798	0.107724
O	-3.56397	-1.1459	0.019703
O	-2.19155	0.628061	-0.042061
C	-4.48224	1.02484	0.414343
H	-4.22027	1.66711	1.25551
H	-4.64861	1.67329	-0.447597
H	-5.39225	0.470762	0.633067
C	0.87889	2.42052	0.496322
O	0.985564	2.01026	1.67589
O	0.581453	1.70657	-0.50945
C	1.11318	3.90081	0.221302
H	0.154032	4.36428	-0.016933
H	1.54653	4.39783	1.08632
H	1.75598	4.02301	-0.650367
O	1.65033	-0.860854	-1.13695
H	1.48049	-1.10999	-2.10439
O	0.421103	-0.534654	1.40339
H	1.26069	-0.910516	1.1144
H	2.0525	0.014903	-1.17784
H	0.639168	0.413908	1.65881
30
mg_h2o-3_ch3oh-1_ch3coo-2
O	2.37294	0.314288	0.258096
O	-0.39762	1.48324	1.38085
O	0.580486	-1.52081	-1.45476
O	0.264674	1.49895	-1.40501
H	2.86165	1.13051	0.142355
H	2.65971	-0.169215	1.12454
H	0.093679	2.24384	1.70008
H	-1.16493	1.80876	0.852373
H	-0.3267	-1.8536	-1.4576
H	-0.6821	1.75486	-1.29441
H	0.373316	1.19993	-2.31257
C	-2.52034	0.397811	-0.546463
O	-2.29492	1.64198	-0.514007
O	-1.62265	-0.478126	-0.362652
C	-3.9367	-0.063597	-0.807344
H	-4.55594	0.21175	0.04759
H	-4.34094	0.455882	-1.6752
H	-3.98465	-1.13935	-0.950904
C	1.55516	-1.6318	2.39793
O	2.66917	-1.05324	2.34567
O	0.610923	-1.45316	1.56435
C	1.29357	-2.60825	3.52552
H	0.51248	-2.2024	4.17001
H	0.917877	-3.54819	3.12215
H	2.19256	-2.78149	4.11009
C	1.51786	-2.60911	-1.4342
H	2.50865	-2.16597	-1.39998
H	1.37217	-3.22755	-0.549254
H	1.41882	-3.2114	-2.33764
Mg	0.353237	-0.07378	0.134245
22
mg_h2o-3_ch3oh-1_ochnh2-1_P2
O	-2.25566	-0.801667	-1.78008
Mg	-0.839366	-0.435439	-0.483534
O	-0.910562	1.60272	-0.949726
O	-0.784275	-2.45599	0.054834
O	-1.34646	0.024679	1.44186
H	-1.65515	2.05781	-1.36332
H	-0.179047	2.23289	-0.934828
H	-1.49446	-3.09356	-0.092562
H	-0.017618	-2.96394	0.349239
H	-1.56042	0.902229	1.78446
H	-1.5153	-0.604315	2.15539
C	2.10558	-0.636979	-1.70238
O	1.20586	-0.390348	-0.565325
H	1.7415	-0.188012	0.211035
H	2.69994	0.252192	-1.89362
H	2.74436	-1.48761	-1.48133
H	1.478	-0.856177	-2.56045
C	-2.83559	-1.07942	-2.85414
H	-2.26329	-1.27809	-3.76305
N	-4.13948	-1.15528	-2.9834
H	-4.75925	-0.988936	-2.20182
H	-4.55563	-1.38392	-3.87493
16
mg_h2o-3_ochnh2-1_P2
Mg	-0.212619	-0.166995	0.153266
O	-0.167548	1.34736	1.47891
O	0.718797	-1.66979	1.11989
O	1.04989	0.292776	-1.34176
H	-0.895743	1.62169	2.05532
H	0.529423	2.01005	1.59156
H	0.813169	0.733246	-2.17102
H	1.03655	-1.64865	2.03449
H	1.99358	0.085906	-1.40491
H	0.867128	-2.57328	0.804504
O	-1.97381	-0.44566	-0.489398
C	-3.07592	-1.00795	-0.726228
H	-3.26564	-2.02336	-0.375241
N	-4.04894	-0.440994	-1.38769
H	-3.96765	0.499646	-1.75214
H	-4.91535	-0.935774	-1.55173
27
mg_h2o-4_ch3coo-2
O	2.39649	-0.050413	-0.554324
O	0.483425	0.994434	1.75786
O	-0.271079	-0.795932	-2.03866
O	0.344085	2.01166	-0.929463
H	3.07144	0.626397	-0.618539
H	2.7523	-0.893974	-0.081242
H	1.24695	1.4606	2.1068
H	-0.262452	1.63522	1.67666
H	0.078536	-1.68638	-2.15481
H	-1.19549	-0.899654	-1.76743
H	-0.420362	2.3661	-0.415367
H	0.141211	2.12302	-1.86275
C	-2.29437	1.16008	0.481975
O	-1.71401	2.2303	0.823003
O	-1.67621	0.144244	0.0402
C	-3.79634	1.07485	0.631663
H	-4.02108	0.815498	1.66826
H	-4.25462	2.0398	0.426961
H	-4.21355	0.303069	-0.010107
C	1.63492	-2.57696	0.866378
O	2.81777	-2.21122	0.661655
O	0.605277	-1.90885	0.524581
C	1.38871	-3.89454	1.57081
H	0.934733	-3.69597	2.54277
H	0.676583	-4.49174	1.00201
H	2.31572	-4.44355	1.70897
Mg	0.39272	-0.014387	-0.107676
25
mg_h2o-4_ch3oh-1_ochnh2-1_P2
O	-3.02115	-0.758962	-0.798722
Mg	-1.03926	-0.398218	-0.931762
O	-0.855815	-0.515555	1.16389
O	-1.18141	-0.273081	-3.03022
O	-0.496759	-2.47312	-1.09408
O	-1.31951	1.68604	-0.789472
H	-1.57255	-0.640214	1.79793
H	-0.047431	-0.395531	1.67734
H	-1.98833	-0.330121	-3.5564
H	-0.460587	-0.088079	-3.6448
H	-0.374177	-3.09096	-0.362763
H	-0.494134	-3.00176	-1.90162
H	-1.49056	2.16956	0.027661
H	-1.60842	2.25886	-1.51
C	1.93722	1.04534	-1.07894
O	1.03683	-0.107702	-1.07615
H	1.56328	-0.910017	-1.16365
H	2.62588	0.976335	-0.240315
H	2.48778	1.07989	-2.01596
H	1.31598	1.92746	-0.979172
C	-3.98558	-1.5488	-0.769636
H	-3.83781	-2.63039	-0.843681
N	-5.24107	-1.1702	-0.650356
H	-5.48847	-0.193142	-0.574616
H	-5.98687	-1.8499	-0.631837
19
mg_h2o-4_ochnh2-1_P2
O	1.58921	1.58694	0.432938
Mg	0.517073	-0.17253	0.136923
O	2.07007	-1.22281	1.0507
O	-0.968511	0.942032	-0.812078
O	1.1065	-0.902471	-1.67281
H	1.54417	2.18041	1.19525
H	2.23681	1.97585	-0.170843
H	2.96248	-0.91045	1.24823
H	1.976	-2.07662	1.49258
H	-0.915934	1.85261	-1.12998
H	-1.89638	0.682368	-0.880829
H	1.80376	-1.55302	-1.82894
H	0.672674	-0.747421	-2.52224
O	-0.812539	-1.13509	1.18684
C	-1.59014	-1.41738	2.128
H	-1.66448	-0.769108	3.00381
N	-2.35881	-2.47994	2.14643
H	-2.36383	-3.14312	1.38281
H	-2.96832	-2.66033	2.93164
22
mg_h2o-5_ochnh2-1_P2
O	-1.23975	1.28581	1.76792
Mg	-0.173482	0.161111	0.343144
O	-0.15569	1.83378	-0.95631
O	0.140956	-1.36526	1.78893
O	1.62335	1.00825	1.08992
O	0.973847	-0.925115	-1.04811
H	-0.874386	1.89409	2.42244
H	-2.20008	1.33112	1.85286
H	-0.706798	2.61931	-0.852869
H	0.104143	1.80742	-1.88543
H	-0.220726	-1.39381	2.68324
H	0.591851	-2.20688	1.64821
H	2.02456	1.82413	0.765281
H	2.19136	0.676705	1.79614
H	1.93367	-0.909798	-1.15002
H	0.629858	-1.49585	-1.74628
O	-1.8778	-0.582334	-0.413535
C	-2.77177	-1.45299	-0.430372
H	-2.74971	-2.30243	0.258415
N	-3.79748	-1.43386	-1.25436
H	-4.49537	-2.1626	-1.22873
H	-3.912	-0.691795	-1.93114
28
mg_ch3coo-3_ochnh2-1_M1
Mg	0.510243	-0.102827	1.56106
C	-0.735717	-0.373532	-1.2269
O	0.089869	0.204253	-1.94842
O	-0.652373	-0.549147	0.036465
C	-2.00061	-0.957067	-1.86125
H	-2.88201	-0.520758	-1.38837
H	-2.02344	-0.768979	-2.9327
H	-2.03652	-2.03148	-1.6739
C	3.18737	-1.62534	1.36584
O	3.65824	-1.29393	0.270427
O	2.0845	-1.22313	1.87356
C	3.95964	-2.61289	2.24388
H	4.17527	-2.15171	3.20923
H	3.33816	-3.48812	2.43994
H	4.88758	-2.91819	1.76489
C	-0.783161	0.184017	3.63162
O	-0.768693	-0.963235	3.12229
O	-0.160672	1.15248	3.09461
C	-1.5522	0.443824	4.91396
H	-2.29594	1.22229	4.73879
H	-2.04049	-0.461333	5.26658
H	-0.867522	0.81661	5.67691
O	1.45214	1.52307	0.597661
C	2.08712	1.3251	-0.43763
N	2.35797	2.31618	-1.31749
H	1.79115	3.14675	-1.24203
H	2.6076	2.03071	-2.24916
H	2.54328	0.356713	-0.659049
28
mg_ch3oh-1_ch3coo-3_M1
Mg	0.2662	-0.655895	1.04665
C	-1.57229	-1.28512	-1.27996
O	-0.943159	-0.653101	-2.15936
O	-1.26556	-1.34774	-0.049991
C	-2.81933	-2.05766	-1.69055
H	-3.66761	-1.72178	-1.09307
H	-3.03288	-1.92493	-2.7485
H	-2.67316	-3.11662	-1.47273
C	2.96643	-1.91818	1.55782
O	3.67634	-0.909346	1.61692
O	1.71333	-1.94848	1.28681
C	3.58343	-3.29404	1.82091
H	3.09014	-3.7542	2.67884
H	3.40844	-3.94622	0.963592
H	4.65131	-3.21135	2.01167
C	-0.592567	0.411633	3.07526
O	-0.700333	-0.838473	2.98887
O	-0.071195	1.09241	2.13959
C	-1.07409	1.13643	4.31724
H	-1.69637	1.98463	4.03212
H	-1.62619	0.465678	4.97107
H	-0.209125	1.53259	4.85189
O	0.968366	0.318972	-0.673879
H	0.317808	0.038573	-1.38028
C	2.29482	0.406582	-1.1795
H	2.52674	-0.447746	-1.8219
H	2.98004	0.397852	-0.334766
H	2.42458	1.3282	-1.75567
27
mg_im-1_h2o-1_ch3coo-2
N	-0.062475	-0.152364	1.11137
C	-1.16822	0.587892	0.7515
C	-0.046101	-0.191686	2.42883
C	-1.82335	0.997725	1.87284
H	-1.40396	0.762307	-0.282445
H	0.694343	-0.700674	3.0211
N	-1.09531	0.493336	2.93025
H	-2.71319	1.58218	2.01411
H	-1.30482	0.611101	3.90606
Mg	1.40693	-1.05253	-0.145485
O	3.0242	0.082405	-0.577662
H	3.95209	-0.088329	-0.407893
H	2.86754	0.3512	-1.55996
C	2.07952	-3.10392	0.960853
O	1.55016	-3.09014	-0.193723
O	2.26177	-2.01969	1.58885
C	1.04768	0.10205	-2.86315
O	2.20896	0.56949	-2.91216
O	0.541925	-0.468434	-1.83938
C	2.48981	-4.42368	1.56427
H	2.88359	-4.29231	2.56805
H	1.63319	-5.09724	1.58129
H	3.24644	-4.88626	0.929889
C	0.162412	0.206013	-4.08676
H	-0.766089	0.714423	-3.82581
H	0.665007	0.739782	-4.88802
H	-0.104687	-0.796956	-4.42121
17
mg_hcoo-4_M2
Mg	0.038461	0.166425	-0.187541
C	-0.247374	2.81344	1.24612
O	-0.255634	4.0452	1.30417
O	-0.049075	2.08642	0.215989
C	-0.025569	-1.75814	2.15548
O	-0.55246	-2.28512	3.13773
O	-0.510703	-0.837946	1.415
C	-2.36245	-0.630966	-1.85996
O	-2.94162	-0.841939	-2.92756
O	-1.15412	-0.25704	-1.69212
C	2.49822	-0.663553	-1.74476
O	3.68811	-0.969413	-1.84929
O	1.86886	-0.350885	-0.678682
H	1.87735	-0.652297	-2.66893
H	-0.432955	2.24494	2.1858
H	-2.93788	-0.779067	-0.917123
H	0.990177	-2.10411	1.8577
18
mg_h2o-3_oh-1_ch3oh-1_P1
O	-2.41316	0.153901	-0.490061
Mg	-0.331258	-0.068623	-0.061793
O	-0.186059	1.63769	-1.20142
O	-0.055355	-1.68633	-1.31314
O	-1.11965	-0.106716	1.61073
H	-2.43403	0.071681	0.508075
H	-3.19851	-0.256122	-0.861936
H	-1.04908	2.02554	-1.39701
H	0.466936	2.34484	-1.22653
H	-0.723673	-2.02572	-1.91925
H	0.553144	-2.41118	-1.12964
H	-1.12028	-0.079181	2.56297
C	2.99031	-0.039032	0.039735
O	1.63729	-0.145929	0.546448
H	1.6335	-0.150046	1.51157
H	3.44339	0.894199	0.368563
H	3.58482	-0.884275	0.380126
H	2.92419	-0.052991	-1.04416
21
mg_h2o-4_oh-1_ch3oh-1_P1
O	-2.44351	0.598902	0.389319
Mg	-0.374073	0.051669	0.207607
O	-0.42489	0.317311	2.2782
O	-0.200106	-0.261625	-1.69181
O	-0.601374	-2.06818	0.045742
O	-0.022022	2.03728	-0.401418
H	-3.15698	0.017295	0.10351
H	-2.64074	1.46957	0.022482
H	-1.18187	0.524432	2.83546
H	0.330709	0.128348	2.8447
H	-0.637309	-0.215204	-2.54032
H	-1.16188	-2.83811	0.172813
H	-0.526318	-1.83953	-0.921284
H	0.502256	2.82608	-0.234599
H	0.14627	1.70907	-1.30799
C	2.82176	0.000978	0.014527
O	1.63135	-0.52389	0.65348
H	1.61772	-1.48303	0.546083
H	3.70042	-0.522081	0.385292
H	2.74228	-0.098672	-1.06648
H	2.89077	1.04928	0.289077
19
mg_h2o-3_oh-1_ch3coo-1
O	-1.82236	0.393023	-1.69226
Mg	-0.412459	0.073704	-0.02256
O	-0.425181	2.23199	0.075471
O	-0.675474	-2.08271	-0.350345
O	-2.20484	-0.331787	0.690941
H	-2.44131	0.105117	-0.968356
H	-1.8921	-0.240743	-2.41182
H	-1.18667	2.60373	-0.383277
H	0.346202	2.42555	-0.47485
H	-1.4651	-1.89692	0.215799
H	-0.075397	-2.62808	0.167533
H	-2.67898	-0.104072	1.48862
C	2.00204	0.068098	0.201581
O	1.26431	-0.273117	1.17178
O	1.47762	0.440052	-0.896319
C	3.50312	0.017762	0.329904
H	3.80158	-0.082338	1.36952
H	3.87339	-0.841583	-0.231867
H	3.94735	0.907657	-0.112708
21
mg_h2o-4_ch3cooh-1_P2
O	-1.54361	0.081697	-2.06556
Mg	-0.814987	0.016755	-0.114614
O	-0.782596	2.0957	-0.119215
O	-0.84248	-2.05869	-0.233432
O	-2.48612	0.008926	1.05096
H	-2.47595	0.105848	-2.32197
H	-1.03943	0.092203	-2.89096
H	-1.19267	2.68556	-0.765272
H	-0.251047	2.65595	0.46135
H	-0.322349	-2.66413	0.310969
H	-1.27508	-2.6011	-0.905834
H	-2.92016	0.780504	1.43905
H	-2.94075	-0.769996	1.39871
C	2.16113	-0.054969	1.00362
O	2.62099	-0.095212	2.22413
O	0.936829	-0.034383	0.7757
C	3.22032	-0.038081	-0.039339
H	3.87556	0.818934	0.127319
H	3.84591	-0.926056	0.0702
H	2.79686	0.001299	-1.03692
H	1.91712	-0.106666	2.89407
22
mg_h2o-4_oh-1_ch3coo-1
O	2.83923	0.957387	0.019268
Mg	0.81598	0.061813	-0.000677
O	0.158779	1.73552	1.14905
O	2.00959	-1.23637	-0.904825
O	0.13828	1.24359	-1.64575
O	1.49081	-1.26378	1.59899
H	2.99394	0.12173	-0.498867
H	3.36123	0.881743	0.823529
H	0.615485	2.56564	0.982355
H	-0.756148	1.83086	0.795794
H	1.96581	-1.79221	-1.68053
H	-0.808732	1.35573	-1.37989
H	0.165208	0.902124	-2.54334
H	0.753302	-1.77837	1.94237
H	1.83969	-1.74843	0.809552
C	-2.12452	-0.027733	0.088107
O	-2.1307	1.19765	-0.230231
O	-1.06406	-0.705405	0.234773
C	-3.45146	-0.711733	0.33004
H	-3.81718	-0.418828	1.31619
H	-4.18546	-0.37673	-0.400151
H	-3.34706	-1.79302	0.303072
24
mg_h2o-5_ch3cooh-1_P2
O	2.80052	0.224413	-0.116517
Mg	0.68055	0.199094	-0.150466
O	0.667492	1.70162	1.31994
O	0.759265	-1.30295	-1.61997
O	0.916569	1.67311	-1.65466
O	0.861554	-1.27687	1.35953
H	3.36198	0.783324	-0.668319
H	3.3879	-0.295673	0.445721
H	1.43801	2.11168	1.73272
H	-0.109541	2.13367	1.69593
H	1.55756	-1.69008	-2.00099
H	0.011466	-1.71304	-2.07209
H	0.832886	2.62613	-1.52662
H	0.861193	1.52137	-2.60627
H	0.825571	-1.13175	2.31312
H	0.89133	-2.23258	1.22805
C	-2.53027	-0.046527	-0.025371
O	-3.50392	0.608935	-0.608038
O	-1.3431	0.239499	-0.237753
C	-3.00954	-1.1268	0.881227
H	-3.65448	-0.693749	1.64773
H	-3.63192	-1.82278	0.316436
H	-2.18085	-1.65205	1.34204
H	-3.176	1.30757	-1.19735
18
mg_h2o-3_oh-1_ochnh2-1_P1
O	2.14689	-0.259262	-1.50414
Mg	0.675727	-0.274309	-0.046031
O	0.979615	1.60227	-0.238502
O	0.786194	-2.35236	0.068711
O	1.48419	0.128718	1.79892
H	2.37968	-0.551084	-2.38929
H	2.0882	0.725544	-1.46998
H	0.634299	2.46933	-0.435783
H	1.55324	-2.92457	-0.035884
H	0.019109	-2.91067	0.234358
H	1.63101	1.06558	1.55183
H	2.13219	-0.154238	2.44938
O	-1.32051	-0.563249	-0.059295
C	-2.22785	0.286238	-0.063717
H	-2.00124	1.35581	-0.078922
N	-3.51283	-0.022028	-0.050875
H	-3.81066	-0.986262	-0.036918
H	-4.21637	0.69815	-0.054252
21
mg_h2o-4_oh-1_ochnh2-1_P1
O	-0.304516	-0.053374	1.7022
Mg	-0.617153	0.130909	-0.191415
O	-0.976013	-1.97889	0.252459
O	-0.792772	2.2359	-0.164306
O	-2.75884	-0.023206	-0.379565
O	-0.734013	0.136707	-2.29814
H	-0.668897	0.22752	2.53947
H	-0.700722	-1.59933	1.14161
H	-0.529125	-2.81646	0.104135
H	-0.533231	2.64363	0.669847
H	-0.641299	2.87826	-0.865289
H	-3.00812	-0.894346	-0.043197
H	-3.39783	0.611103	-0.038363
H	-1.51495	-0.109972	-2.80414
H	0.04665	-0.08658	-2.81642
O	1.40959	0.003642	-0.653784
C	2.28488	-0.090591	0.222003
H	2.00249	-0.101068	1.27912
N	3.5801	-0.183913	-0.049625
H	4.25607	-0.261489	0.691425
H	3.90819	-0.182419	-1.00344
22
mg_h2o-2_ch3coo-1_ch3cooh-1_P1
Mg	0.45492	0.852346	-0.204446
O	0.85556	-1.11589	0.153289
C	2.11087	-0.845242	0.087858
C	3.12527	-1.92502	0.274394
O	2.43927	0.356799	-0.137618
O	-1.52484	0.585898	-0.130611
O	-1.76538	-1.60524	0.277298
C	-2.24539	-0.41078	0.062323
C	-3.73353	-0.33243	0.065146
H	2.96331	-2.7031	-0.472021
H	2.9819	-2.38836	1.25085
H	4.1328	-1.53144	0.191446
H	-4.13035	-0.997654	-0.70247
H	-4.06433	0.685045	-0.110936
H	-4.11224	-0.69461	1.02135
O	0.59509	2.3066	1.21752
H	1.44771	2.54954	1.59849
H	-0.090346	2.79771	1.68374
O	0.554102	1.70379	-2.05421
H	-0.144715	1.9999	-2.6478
H	1.3961	1.7917	-2.51729
H	-0.775028	-1.62231	0.268077
18
mg_h2o-1_oh-1_ch3oh-1_ochnh2-1_P1
O	-1.00425	-1.86379	1.04711
Mg	-0.503486	-0.439904	0.032728
O	-0.931021	-1.6479	-1.53838
O	1.32131	0.311249	-0.061525
H	-1.20864	-2.20129	1.91416
H	-1.1822	-2.41029	-0.982434
H	-0.845067	-1.91077	-2.45787
C	-1.59142	2.53923	-0.431423
O	-1.70566	1.17729	0.063833
H	-2.56728	1.04513	0.475773
H	-0.591649	2.63986	-0.841322
H	-2.3311	2.71218	-1.2096
H	-1.72452	3.24069	0.388644
C	2.41603	-0.020792	0.430093
H	2.50128	-0.881046	1.09959
N	3.54122	0.624386	0.1903
H	4.40713	0.324966	0.608742
H	3.55308	1.42893	-0.419732
21
mg_h2o-2_oh-1_ch3oh-1_ochnh2-1_P1
O	1.61903	0.235355	-0.521303
Mg	-0.293251	-0.318854	-0.122621
O	-0.484332	-0.16398	-2.21273
O	-0.287043	-0.690468	1.73523
O	-0.837676	-2.31455	-0.057654
H	0.32348	0.030565	-2.7019
H	-1.0754	-0.636626	-2.8078
H	-0.017647	-0.535312	2.63608
H	-1.48845	-2.98144	-0.288225
H	-0.785872	-2.19992	0.927687
C	-2.61912	2.04493	-0.39872
O	-1.75765	1.05405	0.197406
H	-1.89402	0.973592	1.15183
H	-3.66293	1.76707	-0.264256
H	-2.43038	3.02195	0.042112
H	-2.38145	2.07324	-1.45749
C	2.54695	0.220894	0.306384
H	2.37359	-0.114415	1.33228
N	3.78183	0.59764	0.021731
H	4.02114	0.921543	-0.903557
H	4.50427	0.567184	0.72202
26
mg_h2o-3_oh-1_ch3coo-2_M1
O	1.72926	-2.08533	0.608168
O	-0.294091	-0.944184	-1.85599
O	-0.004783	-0.131153	2.50539
O	-0.84865	-2.63025	0.049019
H	1.38522	-2.86754	0.160069
H	2.42841	-1.62445	0.074244
H	-0.741255	-1.77137	-1.5595
H	-1.01369	-0.275039	-1.93727
H	0.748798	0.424289	2.25688
H	-0.781293	0.378192	2.21
H	-1.68444	-2.92935	0.40463
C	-2.35222	1.05588	-0.330085
O	-2.29466	0.91366	-1.56369
O	-1.616	0.457398	0.523608
C	-3.37478	2.02895	0.252617
H	-2.84855	2.8632	0.720744
H	-4.0348	2.40993	-0.523268
H	-3.95765	1.53499	1.03093
C	2.5781	0.727801	-0.238571
O	3.2809	-0.268713	-0.50633
O	1.40703	0.703408	0.263768
C	3.13795	2.11455	-0.540011
H	2.58062	2.54121	-1.37599
H	2.99036	2.77361	0.315959
H	4.19297	2.06325	-0.799938
Mg	0.00486	-0.857261	0.311692
24
mg_h2o-3_oh-1_ch3oh-1_ochnh2-1_P1
O	1.75083	-0.173929	-0.634508
Mg	-0.293009	-0.011289	-0.230987
O	0.01671	0.462311	1.6146
O	-0.363706	-0.360648	-2.31187
O	-0.382723	2.18358	-0.15786
O	-0.643901	-2.06156	0.130988
H	-0.392993	0.374187	2.47316
H	0.442857	-0.296845	-2.83461
H	-1.10753	-0.108235	-2.86846
H	-0.173128	1.91947	0.790058
H	0.173348	2.92185	-0.420413
H	-0.447912	-2.34065	1.03265
H	-0.500142	-2.81698	-0.448226
C	-3.54003	-0.245186	0.073812
O	-2.37862	0.383858	-0.508817
H	-2.43101	1.34212	-0.398563
H	-3.58643	-0.049876	1.14451
H	-4.444	0.117117	-0.412073
H	-3.43983	-1.31224	-0.09673
C	2.61499	-0.026301	0.244254
H	2.31701	0.193165	1.27407
N	3.91783	-0.118719	0.008635
H	4.26116	-0.316554	-0.918875
H	4.58448	0.01162	0.750672
27
mg_adp_h2o-4
O	-8.32348	2.84838	1.66363
P	-8.41615	4.2254	0.76834
O	-9.57877	4.15619	-0.171237
P	-7.77772	1.37619	1.19033
O	-8.76172	0.64927	0.341073
O	-7.61041	0.638082	2.60403
O	-6.39726	1.62844	0.563029
O	-7.04439	4.43335	0.128549
Mg	-6.35459	2.90822	-1.01571
O	-8.57371	5.32847	1.90784
C	-9.84386	5.50894	2.55757
H	-10.0397	4.68013	3.238
H	-9.77125	6.43601	3.11973
H	-10.6419	5.57742	1.82033
O	-6.30292	3.9145	-2.88627
H	-6.02226	4.83553	-2.90189
H	-7.19562	3.88113	-3.25255
O	-5.34188	1.20614	-1.79971
H	-5.5824	0.652227	-1.03594
H	-5.57187	0.726795	-2.60096
O	-4.55272	3.93271	-0.47578
H	-3.84438	3.46466	-0.023485
H	-5.03383	4.45252	0.192809
O	-8.29814	2.36156	-1.73052
H	-8.58288	1.55601	-1.23219
H	-8.93239	3.04129	-1.37802
H	-6.95168	1.05764	3.16776
23
mg_phos-1_h2o-5_P1
Mg	1.34059	-0.043401	-0.407202
O	-2.02695	-1.47441	-0.20418
P	-1.74066	0.134642	-0.027616
O	-1.55388	0.488071	1.41338
O	-0.538792	0.336716	-0.949374
O	-3.04135	0.863741	-0.586457
O	0.997186	0.495735	1.56369
H	-2.71211	-1.8029	0.392069
H	1.40456	0.264134	2.40187
O	0.772349	-2.08651	-0.220508
H	1.05466	-2.76472	0.400812
H	-3.21217	0.738844	-1.52715
H	-0.202275	-2.14926	-0.275826
H	-0.012895	0.54207	1.69314
O	3.36396	-0.594374	-0.123647
H	3.8271	-1.43752	-0.095946
H	4.02701	0.103159	-0.066496
O	2.1541	1.92115	-0.533076
H	2.11066	2.43958	-1.34448
H	1.84584	2.48835	0.184882
O	1.56892	-0.117461	-2.52156
H	2.08143	-0.665621	-3.12364
H	0.663349	-0.071139	-2.85802
28
mg_atp_h2o-3_M1
O	1.19337	-0.977929	-0.738834
P	2.05295	0.277905	-0.139975
O	2.82601	-0.106059	1.08953
P	-0.119735	-1.67481	-0.02437
O	0.007534	-3.14264	-0.058305
O	-1.34402	-1.1962	-1.02581
O	-0.336996	-0.892715	1.26737
O	1.12518	1.47019	0.015628
O	3.01603	0.587689	-1.39311
C	4.05213	-0.342994	-1.7101
H	3.62819	-1.2693	-2.10161
H	4.67103	0.125305	-2.4735
P	-2.46455	-0.073766	-0.653479
O	-1.75269	1.23414	-0.357469
O	-3.42303	-0.546888	0.406765
O	-3.2182	0.075332	-2.07839
Mg	-0.478291	1.13687	1.26176
O	-2.27259	0.85982	2.44075
H	-2.14214	0.240464	3.16484
H	-2.8224	0.34767	1.77888
O	-0.594435	3.29244	1.01434
H	-1.29209	3.18201	0.348498
H	0.226693	3.26492	0.495256
O	0.967113	0.889546	2.88916
H	1.77562	0.662802	2.35607
H	0.692783	0.011277	3.18279
H	4.65452	-0.564261	-0.828262
H	-3.9932	-0.49556	-2.08755
32
mg_atp_h2o-4
C	-1.90407	1.41545	2.22816
H	-1.48289	2.14018	1.53576
H	-2.88618	1.73464	2.56847
O	-2.01638	0.116498	1.58714
P	-2.99705	-0.033527	0.314396
O	-4.34632	0.520792	0.482883
O	-2.93947	-1.63494	0.145154
O	-2.20919	0.558026	-0.920263
P	-0.689656	0.432491	-1.58139
O	-0.782135	0.729212	-3.0142
O	-0.107966	-0.889072	-1.08511
O	0.042695	1.6229	-0.734022
P	1.43382	1.55265	0.116668
O	2.61981	1.52258	-0.805969
O	1.3167	0.399336	1.10021
O	1.34797	2.9194	0.950872
Mg	1.23487	-1.43536	0.307467
O	2.70491	-2.31546	1.56521
H	2.58655	-2.13731	2.50457
H	3.55432	-1.93679	1.30631
O	0.742255	-3.29186	-0.692918
H	0.191894	-2.84479	-1.36051
H	1.25541	-3.97988	-1.124
O	2.98529	-1.03952	-0.873126
H	3.05508	-1.3466	-1.7815
H	2.99399	-0.024966	-0.927575
O	-0.179378	-1.99478	1.77083
H	-0.787928	-1.23379	1.86297
H	1.76117	3.65026	0.477293
H	-1.23001	1.27964	3.06715
H	-0.741936	-2.73365	1.51451
H	-3.83764	-1.98588	0.116394

## Sheet: zn_xyz
Supporting Information for
Parameterization of DFTB3/3OB for Magnesium and Zinc for Chemical and Biological Applications
Xiya Lu, Michael Gaus, Marcus Elstner and Qiang Cui
XYZ-Coordinates of the Zinc Test Set
B3LYP/aug-cc-pVTZ optimized structures
15
zn_ac-2
zn	1e-06	-0.006615	-0.00041
o	1.71489	-0.782314	0.780308
c	2.36274	-0.009911	0.006261
c	3.8615	-0.000432	0.000749
o	1.71552	0.76284	-0.770665
o	-1.71504	-0.784569	-0.778548
o	-1.71536	0.766021	0.766996
c	-2.36274	-0.009625	-0.006909
c	-3.86149	-9.2e-05	-0.001144
h	4.25762	-0.721075	0.708804
h	4.21317	1.00062	0.249548
h	4.21749	-0.226547	-1.00399
h	-4.25777	-0.723351	-0.706444
h	-4.21318	1.00003	-0.253615
h	-4.21729	-0.222447	1.0045
5
zn_ch3-1_P1
zn	0.838477	9e-06	6.7e-05
c	-1.16232	-8.8e-05	0.000223
h	-1.42218	-0.737412	-0.752797
h	-1.42228	1.02042	-0.262818
h	-1.42223	-0.283051	1.01531
9
zn_ch3-2
zn	0	0.000115	0
c	0.00013	1.1e-05	1.95689
h	0.040822	1.01786	2.34908
c	-0.00013	1.1e-05	-1.95689
h	-0.901496	-0.473926	2.34917
h	0.861513	-0.544003	2.3488
h	-0.040822	1.01786	-2.34908
h	-0.861513	-0.544003	-2.3488
h	0.901496	-0.473926	-2.34917
3
zn_co-1_P2
zn	-0.016033	-1.41416	0
c	0.005884	0.62394	0
o	0.017781	1.73018	0
5
zn_co-2_P2
Zn	0	5e-06	4.8e-05
C	0	-0.085096	-2.0304
O	0	-0.131449	-3.13636
C	0	0.085106	2.0305
O	0	0.13146	3.13646
7
zn_co-3_P2
zn	0	0	0
c	0	2.09163	0
o	0	3.20026	0
c	1.81141	-1.04582	0
o	2.77151	-1.60013	0
c	-1.81141	-1.04582	0
o	-2.7715	-1.60013	0
9
zn_co-4_P2
zn	-3.8e-05	-2.2e-05	-5.8e-05
c	-1.23792	-1.67993	0.462204
c	-1.23079	1.68341	-0.46819
c	1.23774	-0.466989	-1.67866
c	1.23098	0.463494	1.68466
o	-1.88097	-2.55222	0.702269
o	-1.8699	2.55775	-0.711322
o	1.88055	-0.709637	-2.55042
o	1.87034	0.70414	2.55951
2
zn_h-1_P1
zn	0	0	0.06401
h	0	0	-1.46863
3
zn_h-2
h	0	0	1.54169
zn	0	0	0
h	0	0	-1.54169
4
zn_h2o-1_P2
zn	-0.868871	-1.1e-05	-7.9e-05
o	0.999264	6e-06	0.00033
h	1.56587	-0.80299	0.000412
h	1.56584	0.80302	0.000412
7
zn_h2o-2_P2
zn	0	-0.000429	-0.000422
o	1.86504	0.000346	0.00023
h	2.43309	-0.560454	0.564603
h	2.43293	0.561586	-0.563859
o	-1.86504	0.00027	0.000316
h	-2.43254	0.565151	0.561153
h	-2.43347	-0.564057	-0.560136
10
zn_h2o-3_P2
zn	-0.009661	0.000728	-0.000461
o	1.08861	-1.59446	0.067465
h	1.95371	-1.67478	0.504425
h	0.872498	-2.45568	-0.329257
h	1.6783	1.95667	-0.486712
h	0.485915	2.55977	0.3428
o	0.833546	1.7432	-0.05481
h	-2.55931	0.446211	-0.464084
h	-2.46182	-0.841514	0.434023
o	-1.94038	-0.152032	-0.011501
13
zn_h2o-4_P2
zn	0	0	0
o	-0.001594	1.60556	1.18324
o	0.001594	-1.60556	1.18324
o	1.60556	0.001594	-1.18324
o	-1.60556	-0.001594	-1.18324
h	-0.534959	1.73473	1.98237
h	0.549406	2.39527	1.07035
h	1.73473	0.534959	-1.98237
h	0.534959	-1.73473	1.98237
h	-2.39527	0.549406	-1.07035
h	2.39527	-0.549406	-1.07035
h	-0.549406	-2.39527	1.07035
h	-1.73473	-0.534959	-1.98237
16
zn_h2o-5_P2
O	-0.193563	0	2.11149
Zn	-0.403738	0	0
O	0.277284	1.9132	0
O	0.277284	-1.9132	0
O	-2.44877	0	0
O	-0.193563	0	-2.11149
H	0.621394	0	2.63328
H	-0.928418	0	2.74077
H	0.46108	2.45199	0.781856
H	0.46108	2.45199	-0.781856
H	0.46108	-2.45199	0.781856
H	0.46108	-2.45199	-0.781856
H	-3.0219	0.779982	0
H	-3.0219	-0.779982	0
H	0.621394	0	-2.63328
H	-0.928418	0	-2.74077
19
zn_h2o-6_P2
O	0	0	2.12244
O	0	2.12244	0
O	0	-2.12244	0
O	2.12244	0	0
O	-2.12244	0	0
O	0	0	-2.12244
H	0.777911	0	2.6955
H	-0.777911	0	2.6955
H	0	2.6955	0.777911
H	0	2.6955	-0.777911
H	0	-2.6955	0.777911
H	0	-2.6955	-0.777911
H	2.6955	0.777911	0
H	2.6955	-0.777911	0
H	-2.6955	0.777911	0
H	-2.6955	-0.777911	0
H	0.777911	0	-2.6955
H	-0.777911	0	-2.6955
Zn	0	0	0
6
zn_h-ch3
zn	-8.6e-05	-0.758672	0
h	4.5e-05	-2.30165	0
c	-0.000224	1.19502	0
h	-1.01956	1.58486	0
h	0.509126	1.58515	0.882742
h	0.509126	1.58515	-0.882742
5
zn_h-nh2
zn	-0.003176	0	0.385443
h	0.003451	0	1.90494
n	-0.129551	0	-1.43706
h	0.118438	0.820402	-1.97037
h	0.118438	-0.820402	-1.97037
4
zn_h-oh
zn	-0.002133	0.047309	0.297172
o	-0.023967	0.368079	-1.45808
h	0.023694	-0.380594	-2.05613
h	0.006405	-0.111794	1.80039
4
zn_h-sh
zn	0.028342	1.24212	0
s	0.059041	-0.944878	0
h	-1.28459	-1.0496	0
h	0.044328	2.77201	0
4
zn_nh2-1_P1
n	-1.06824	0.004865	-0.321697
zn	0.742463	-0.004687	0.083729
h	-1.49025	0.819068	0.132549
h	-1.49372	-0.818287	0.112816
7
zn_nh2-2
zn	-0.000366	-4.5e-05	-0.027597
n	-0.107176	1.8158	-0.129155
n	0.106757	-1.81593	-0.127066
h	0.201212	2.36074	0.663219
h	-0.956537	2.22808	-0.488287
h	0.955751	-2.22748	-0.48805
h	-0.199642	-2.36117	0.665786
5
zn_nh3-1_P2
zn	-0.125366	-0.000687	0.000192
n	-2.08504	-5.3e-05	0.000171
h	-2.46221	0.952237	-0.111677
h	-2.46262	-0.378971	0.880783
h	-2.46267	-0.572935	-0.768409
9
zn_nh3-2_P2
zn	5e-06	0.000829	3.7e-05
n	-1.94637	6.7e-05	0.000165
h	-2.34174	0.940354	-0.109993
h	-2.34075	-0.374952	0.869892
h	-2.34094	-0.565894	-0.759172
h	2.3418	0.941359	-0.099732
h	2.34071	-0.384515	0.865798
h	2.34094	-0.55774	-0.765251
n	1.94638	-5.2e-05	0.000183
13
zn_nh3-3_P2
zn	-0.002129	0.000435	0.002981
n	-0.908787	1.81499	-0.036058
h	-0.261861	2.59767	0.073311
h	-1.60522	1.92963	0.703126
h	-1.40663	1.99127	-0.911322
h	2.44102	0.374473	0.821741
h	2.37432	-1.07796	0.09146
h	2.45696	0.278877	-0.803191
n	2.02296	-0.120889	0.031493
h	-1.013	-2.23462	0.87092
h	-2.12108	-1.52308	-0.085082
h	-0.875991	-2.33396	-0.748131
n	-1.11858	-1.69323	0.010283
17
zn_nh3-4_P2
zn	0	0	0
n	1.20688	1.20688	1.20688
n	-1.20688	-1.20688	1.20688
n	1.20688	-1.20688	-1.20688
n	-1.20688	1.20688	-1.20688
h	1.82235	0.675921	1.82235
h	0.675921	1.82235	1.82235
h	-1.82235	-0.675921	1.82235
h	1.82235	1.82235	0.675921
h	1.82235	-0.675921	-1.82235
h	-0.675921	1.82235	-1.82235
h	-0.675921	-1.82235	1.82235
h	-1.82235	1.82235	-0.675921
h	1.82235	-1.82235	-0.675921
h	-1.82235	-1.82235	0.675921
h	-1.82235	0.675921	-1.82235
h	0.675921	-1.82235	-1.82235
21
zn_nh3-5_P2
Zn	0.109692	-0.00928	0.07176
H	-0.01575	2.70652	0.970595
H	-0.630715	2.69211	-0.521987
H	2.76687	0.005131	0.551573
H	2.06976	-0.805409	1.76751
H	-2.33644	0.803944	0.910983
H	-2.33156	-0.814415	0.933617
H	0.578584	0.78558	-2.4772
H	-0.805262	-0.054993	-2.46702
H	-0.013732	-2.7091	1.01818
H	-0.62698	-2.72176	-0.475184
N	1.94888	0.00195	1.15926
N	0.110565	-2.30616	0.091075
N	-1.74999	-0.000675	1.12318
N	0.130337	-0.029673	-2.06399
N	0.107964	2.28736	0.05063
H	2.06118	0.812929	1.76436
H	0.972916	-2.71933	-0.259619
H	-1.62968	0.013809	2.13496
H	0.969533	2.69511	-0.308237
H	0.615093	-0.83239	-2.46031
25
zn_nh3-6_P2
H	0.542909	-0.566331	2.73394
H	-0.987598	-0.057495	2.66709
H	-0.555917	2.73937	0.521489
H	-0.073512	2.65886	-1.01684
H	0.069374	-2.65501	1.02215
H	0.579593	-2.73674	-0.507047
H	2.74182	0.524556	-0.58202
H	2.66914	-1.00885	-0.083397
H	-2.65401	1.01167	0.085208
H	-2.72494	-0.520699	0.587535
H	1.00235	0.082653	-2.66345
H	-0.538271	0.559785	-2.73096
Zn	0.007958	0.001934	0.001368
N	2.28321	-0.083999	0.092313
N	-0.096837	-2.27193	0.094363
N	-0.063814	0.109119	2.27467
N	-2.26747	0.086716	-0.088596
N	0.081947	-0.103366	-2.27179
N	0.110044	2.2757	-0.092359
H	-0.999703	-2.64768	-0.186614
H	2.66324	0.191263	0.99513
H	-0.182993	-1.01219	-2.64468
H	1.0174	2.65244	0.172335
H	-2.64797	-0.191039	-0.990454
H	0.220138	1.01255	2.64669
5
zn_nch2-1_P1
Zn	-0.806165	-0.062176	-0.000214
N	1.04053	0.48047	9.1e-05
C	2.00263	-0.318774	0.000317
H	1.98984	-1.40962	0.000468
H	2.99746	0.151277	0.000616
9
zn_nch2-2
Zn	-0.000265	-0.000886	0.396604
N	1.81485	0.197014	0.618457
C	2.78118	-0.194883	-0.08407
H	3.81157	0.033383	0.223594
H	2.70947	-0.770369	-1.01884
N	-1.81563	-0.199195	0.616171
C	-2.78111	0.194949	-0.086264
H	-2.70827	0.772838	-1.01946
H	-3.8119	-0.033687	0.219809
6
zn_nhch2-1_P2
Zn	-0.744721	0.343638	0.321403
N	-2.62987	0.663621	0.579295
H	-2.84438	1.32255	1.33491
C	-3.62593	0.169094	-0.057772
H	-3.50686	-0.538709	-0.874081
H	-4.63669	0.468249	0.231268
11
zn_nhch2-2_P2
Zn	-0.750107	0.336154	0.317655
N	1.12409	-0.001954	0.12911
H	1.4772	-0.851663	0.572864
C	2.02043	0.690448	-0.471267
H	3.05592	0.357887	-0.479716
H	1.77115	1.61572	-0.980541
N	-2.61781	0.662052	0.578321
H	-2.86335	1.30885	1.32997
C	-3.62476	0.178338	-0.05047
H	-3.49503	-0.521479	-0.869645
H	-4.63574	0.4647	0.230282
16
zn_nhch2-3_P2
Zn	-0.521853	1.51087	0.314412
N	1.17142	0.663374	-0.313544
H	1.67571	1.13506	-1.064
C	1.76405	-0.387786	0.10444
H	2.70824	-0.713153	-0.324126
H	1.33632	-0.98264	0.904775
N	-2.15546	0.448471	0.737231
H	-2.62358	0.648526	1.62091
C	-2.73679	-0.46266	0.056646
H	-2.34208	-0.77075	-0.906028
H	-3.63822	-0.950319	0.418229
N	-0.512546	3.4918	0.54317
H	0.378306	3.92497	0.78483
C	-1.46305	4.33588	0.422208
H	-2.46458	4.00762	0.164716
H	-1.29759	5.39973	0.56999
21
zn_nhch2-4_P2
Zn	-0.863459	0.422234	0.138727
N	0.570116	0.396624	-1.33415
H	0.59976	1.19685	-1.96485
C	1.46359	-0.470001	-1.60407
H	2.16551	-0.338781	-2.42324
H	1.54313	-1.37492	-1.01072
N	-2.70252	0.648752	-0.754554
H	-3.4003	1.2013	-0.258619
C	-3.1281	0.216956	-1.87449
H	-2.48401	-0.383928	-2.5085
H	-4.13237	0.429721	-2.23086
N	-0.504173	2.04774	1.34705
H	0.18367	2.72483	1.02004
C	-1.02285	2.37977	2.46189
H	-1.77218	1.74654	2.92649
H	-0.740069	3.29194	2.98052
N	-0.870189	-1.31351	1.23694
H	-1.57777	-2.00721	0.998676
C	-0.133272	-1.67861	2.20967
H	0.660109	-1.02966	2.5669
H	-0.268898	-2.63472	2.70833
3
zn_oh-1_P1
Zn	-0.144663	-0.027843	0.307482
O	0.38449	0.07455	-1.37396
H	-0.328828	-0.063707	-2.01941
5
zn_oh-2
zn	-0.008359	0.002069	0.156392
o	0.095595	1.7735	0.227637
h	0.787004	2.16803	-0.310092
o	-0.122075	-1.76697	0.263173
h	-0.752165	-2.17663	-0.335167
5
zn_oh-sh
zn	-0.050284	0.358213	0.170997
o	-0.012508	2.13626	0.310413
h	-0.342422	2.62813	-0.445852
s	-0.08298	-1.80602	0.167469
h	1.16364	-1.91675	-0.332028
2
zn_o
zn	0	0	0.678476
o	0	0	-1.03193
6
zn_och3-1_P1
Zn	0.81433	-0.086473	0.332815
O	-0.787584	-0.373007	-0.407131
C	-2.00721	0.262215	-0.019994
H	-2.30124	0.017058	0.999168
H	-2.73737	-0.184078	-0.709113
H	-1.99044	1.3379	-0.187027
11
zn_och3-2
Zn	0.958499	-0.211256	-0.172021
O	2.71265	-0.438405	-0.053865
C	3.58436	0.184164	0.870003
H	4.59236	-0.200784	0.696004
H	3.31929	-0.032433	1.9107
H	3.61734	1.27248	0.747277
O	-0.808321	-0.221364	-0.316465
C	-1.59889	0.67594	-1.072
H	-2.64378	0.37078	-0.974102
H	-1.34625	0.664656	-2.13797
H	-1.51831	1.70861	-0.714681
4
zn_ph2-1_P1
p	0.969414	0.000117	-0.117125
zn	-1.36097	-0.000249	0.010519
h	1.01019	-1.03326	0.864941
h	1.00968	1.03387	0.86456
7
zn_ph2-2
zn	0	0	0.334753
p	0.214555	2.30086	0.41502
p	-0.214555	-2.30086	0.41502
h	1.63594	2.2376	0.348083
h	0.068749	2.43178	-0.995533
h	-0.068749	-2.43178	-0.995533
h	-1.63594	-2.2376	0.348083
5
zn_ph3-1_P2
p	-0.990528	-0.000167	-1.7e-05
zn	1.39994	0.000201	3.3e-05
h	-1.42652	-1.07325	-0.803937
h	-1.42615	1.23276	-0.527299
h	-1.42565	-0.159922	1.33154
9
zn_ph3-2_P2
p	2.37153	-0.002079	0.000237
zn	1.6e-05	-0.002742	-0.000147
h	-2.90293	1.29826	-0.058768
h	-2.90347	-0.601195	1.15542
h	-2.90382	-0.70304	-1.0966
p	-2.3715	-0.002177	-7.1e-05
h	2.90285	1.29907	-0.040868
h	2.90341	-0.616532	1.14764
h	2.90404	-0.688073	-1.10557
13
zn_ph3-3_P2
p	1.17655	2.13235	-0.046721
zn	0.00173	0.000783	0.003145
h	-3.0205	-1.30578	-0.163837
h	-3.05293	0.777323	-0.902623
h	-2.99072	0.376223	1.2698
p	-2.43163	-0.047992	0.051097
h	1.03464	-2.89709	-1.11637
h	2.65814	-1.95311	0.049257
h	0.973418	-2.93227	1.0923
p	1.25955	-2.08351	0.008365
h	1.9555	2.33666	-1.1995
h	0.364937	3.27811	0.012349
h	2.0897	2.31794	1.0063
17
zn_ph3-4_P2
zn	0	0	0
p	1.43085	1.43085	1.43085
p	-1.43085	-1.43085	1.43085
p	1.43085	-1.43085	-1.43085
p	-1.43085	1.43085	-1.43085
h	2.3053	0.760624	2.3053
h	0.760624	2.3053	2.3053
h	-2.3053	-0.760624	2.3053
h	2.3053	2.3053	0.760624
h	2.3053	-0.760624	-2.3053
h	-0.760624	2.3053	-2.3053
h	-0.760624	-2.3053	2.3053
h	-2.3053	2.3053	-0.760624
h	2.3053	-2.3053	-0.760624
h	-2.3053	-2.3053	0.760624
h	-2.3053	0.760624	-2.3053
h	0.760624	-2.3053	-2.3053
6
zn_sch3-1_P1
Zn	1.3612	0.029879	-0.213648
S	-0.802165	-0.106822	0.068726
C	-1.26878	1.34332	1.0885
H	-0.819849	1.30633	2.07491
H	-1.0777	2.27871	0.574301
H	-2.34937	1.20686	1.18588
11
zn_sch3-2
Zn	-0.042426	-0.270159	0.441037
S	-2.21824	-0.305845	0.330263
S	2.12927	-0.279654	0.618338
C	2.59207	1.48941	0.34668
H	2.30063	1.82934	-0.642954
H	2.15841	2.13388	1.10585
H	3.67557	1.53085	0.427272
C	-2.55362	-0.683338	-1.4481
H	-2.16026	0.091219	-2.10017
H	-2.14943	-1.65091	-1.73123
H	-3.63586	-0.711135	-1.54899
3
zn_sh-1_P1
zn	0.032633	1.26832	0
s	0.053292	-0.899422	0
h	-1.30071	-0.959615	0
4
zn_sh2-1_P2
zn	1.37497	-8.2e-05	0.045965
s	-0.95561	1.5e-05	-0.130735
h	-1.17513	-1.0041	0.774474
h	-1.17426	1.00484	0.773864
7
zn_sh2-2_P2
zn	-0.000111	-0.05909	0.000294
s	-2.32126	-0.155016	0.091375
s	2.32101	-0.156059	-0.090543
h	2.56411	1.16609	0.121396
h	2.53266	-0.509857	1.20664
h	-2.56388	1.16676	-0.123456
h	-2.53307	-0.511569	-1.20503
10
zn_sh2-3_P2
zn	-0.086669	-0.129237	0.108603
s	1.83835	-1.50206	0.498891
s	-2.31695	-0.928433	0.486097
s	0.185117	2.18271	-0.476217
h	-0.728943	2.72694	0.363131
h	1.23815	2.4896	0.319341
h	-2.84905	-0.650445	-0.729122
h	-2.15129	-2.24592	0.22015
h	1.45298	-2.62508	-0.153355
h	2.62615	-1.06974	-0.515394
13
zn_sh2-4_P2
zn	0	0	0.066442
s	-0.019191	1.93354	-1.4738
s	-2.12795	0.08781	1.30509
s	2.12795	-0.08781	1.30509
s	0.019191	-1.93354	-1.4738
h	0.223389	2.95782	-0.625718
h	1.25321	1.886	-1.92932
h	-1.94024	1.17669	2.08415
h	-1.25321	-1.886	-1.92932
h	1.87364	0.784764	2.30564
h	-1.87364	-0.784764	2.30564
h	-0.223389	-2.95782	-0.625718
h	1.94024	-1.17669	2.08415
5
zn_sh-2
zn	0	0	0.321596
s	0.173988	2.17186	0.358978
h	1.13038	2.20025	-0.590054
s	-0.173988	-2.17186	0.358978
h	-1.13038	-2.20025	-0.590054
7
zn_shch3-1_P2
Zn	1.38559	-0.197746	-0.214689
S	-0.929257	0.02401	-0.059187
H	-1.09048	-1.05176	0.763784
C	-1.35055	1.39768	1.1126
H	-0.861861	1.27239	2.07411
H	-1.09935	2.32812	0.608233
H	-2.43811	1.28924	1.2003
13
zn_shch3-2_P2
Zn	-0.032033	0.175916	-0.138242
S	-2.33396	0.118814	-0.081638
S	2.27083	0.151882	-0.183356
H	2.43639	-0.780847	0.78701
H	-2.53903	1.3163	-0.683869
C	2.91223	1.65536	0.704653
H	2.72239	2.49906	0.046638
H	2.44387	1.7701	1.6754
H	3.9824	1.47653	0.790877
C	-2.94247	-1.02258	-1.41848
H	-2.48188	-0.794376	-2.37275
H	-2.72096	-2.03067	-1.07841
H	-4.01825	-0.858389	-1.43907
19
zn_shch3-3_P2
Zn	-0.023386	-0.541517	-0.090865
S	2.07728	-1.49345	0.486063
S	-1.92502	-1.92228	-0.427816
S	-0.210194	1.82439	-0.171291
H	-1.18145	1.96989	0.756785
H	-1.50289	-2.54819	-1.54856
H	2.74028	-1.2289	-0.661612
C	1.19308	2.61504	0.736653
H	1.35351	2.14764	1.70131
H	2.06256	2.52066	0.092147
H	0.92543	3.66311	0.841527
C	2.0238	-3.33807	0.394612
H	3.04913	-3.67227	0.529158
H	1.41475	-3.66676	1.23214
H	1.62099	-3.6748	-0.5536
C	-3.32523	-0.947357	-1.13937
H	-3.73196	-0.359611	-0.321161
H	-2.99552	-0.322541	-1.96144
H	-4.05996	-1.67854	-1.46608
25
zn_shch3-4_P2
Zn	-5.3e-05	8e-05	0.861087
S	-0.458322	1.8497	-0.666598
S	-1.91571	-0.101257	2.37277
S	1.89056	0.095668	2.4045
S	0.483752	-1.84413	-0.665288
H	0.700472	1.88841	-1.35559
H	-1.61483	-1.21464	3.07195
H	-0.663084	-1.88033	-1.37414
H	1.5781	1.20631	3.10296
C	-0.34906	3.47629	0.192446
H	-0.395435	4.24216	-0.576263
H	-1.22506	3.54572	0.831055
H	0.562732	3.55744	0.772782
C	3.41808	0.691854	1.56372
H	4.15742	0.86589	2.34005
H	3.74891	-0.116914	0.918377
H	3.22958	1.59321	0.992082
C	0.359946	-3.47392	0.185703
H	1.2244	-3.54542	0.839623
H	-0.562045	-3.55751	0.74934
H	0.420357	-4.23692	-0.58488
C	-3.42911	-0.69418	1.50459
H	-3.7496	0.117239	0.857361
H	-3.23102	-1.59306	0.932293
H	-4.18099	-0.871684	2.26799
2
zn_s
zn	0	0	-1.19155
s	0	0	0.882461

## Sheet: zn_xyz_mix
Supporting Information for
Parameterization of DFTB3/3OB for Magnesium and Zinc for Chemical and Biological Applications
Xiya Lu, Michael Gaus, Marcus Elstner and Qiang Cui
XYZ-Coordinates of the Zinc Mixed Ligand Test Set
B3LYP/aug-cc-pVTZ optimized structures
6
zn_h2o-2-dep_P1
zn	0.080373	-0.071079	-0.044363
o	-1.82199	0.043161	0.017169
h	-2.32815	0.839089	0.240052
h	-2.43431	-0.662451	-0.24077
o	1.79885	-0.0934	-0.341416
h	2.36554	-0.377907	0.386528
9
zn_h2o-3-dep_P1
zn	-0.091572	-0.208601	0.027881
o	1.89948	-0.229713	-0.003093
h	2.44199	0.294872	-0.607897
h	2.41631	-1.00144	0.267128
h	0.071964	2.49228	0.506184
h	-1.26425	2.10451	-0.197891
o	-0.354096	1.81626	-0.036458
h	-1.67316	-2.00326	-0.021325
o	-1.65394	-1.04591	0.069308
12
zn_h2o-4-dep_P1
zn	0.101663	-0.166844	-0.315429
o	-1.29906	1.35642	-0.458245
o	-1.12683	-1.40345	0.792793
o	1.2972	0.77802	1.12381
o	1.44597	-0.74602	-1.36932
h	-1.75779	1.52904	-1.2911
h	-1.06638	2.21716	-0.084748
h	2.21028	0.715625	0.806214
h	-2.04508	-1.23648	1.03808
h	1.28441	-1.03261	-2.27061
h	1.31553	0.638892	2.07837
h	-0.992878	-2.35989	0.774582
8
zn_nh3-2-dep_P1
zn	-0.117178	-0.014986	-0.032905
n	1.85398	0.015847	-0.005896
h	2.22848	0.922263	-0.287315
h	2.26177	-0.674223	-0.6366
h	2.23051	-0.177299	0.922627
h	-2.41012	0.731789	-0.314163
h	-2.38852	-0.848007	0.157891
n	-1.89507	0.034649	0.209121
12
zn_nh3-3-dep_P1
zn	0.069439	-0.108495	0.014645
n	0.829768	1.822	-0.014782
h	0.303382	2.50678	-0.551197
h	1.76162	1.79152	-0.423632
h	0.943652	2.20964	0.919195
h	-2.38823	0.218436	-0.918703
h	-2.35191	-0.978949	0.18216
h	-2.43021	0.571927	0.673192
n	-2.00221	-0.043297	-0.014286
h	0.704006	-2.55174	0.053165
h	2.07687	-1.63953	0.045478
n	1.0729	-1.61846	-0.033786
16
zn_nh3-4-dep_P1
zn	-0.018983	-0.030548	0.208534
n	0.972865	1.87243	0.091906
n	-1.79355	0.221063	-0.978423
n	-0.52489	-0.915169	1.78403
n	1.2463	-1.35574	-0.913277
h	0.406989	2.57602	0.559323
h	1.20457	2.24562	-0.824457
h	-1.73254	0.174725	-1.99103
h	1.84181	1.82808	0.617963
h	0.181901	-1.29468	2.39949
h	2.21947	-1.31639	-0.623422
h	-2.31059	1.06821	-0.760503
h	1.24684	-1.31153	-1.92782
h	-1.24039	-0.518448	2.37825
h	-2.38306	-0.553365	-0.681299
h	0.914406	-2.28292	-0.657377
6
zn_sh2-2-dep_P1
zn	-0.095764	0.223752	0.217095
s	-2.21305	0.204075	0.548492
s	2.24097	0.208386	-0.075654
h	2.57635	0.680496	1.14785
h	2.45465	-1.08522	0.260819
h	-2.47231	0.814973	-0.628894
9
zn_sh2-3-dep_P1
zn	-0.19339	-0.205387	0.023422
s	-2.05457	-1.32454	0.085511
s	2.17667	-0.825998	-0.183162
s	-0.127888	2.26349	0.161034
h	-0.129674	2.53105	-1.16255
h	-1.46324	2.4213	0.282501
h	2.50114	-0.791372	1.12742
h	1.99302	-2.16322	-0.191506
h	-1.47867	-2.5423	0.051204
12
zn_sh2-4-dep_P1
zn	0.116502	0.052153	-0.263188
s	-2.08183	-1.18493	-0.65806
s	-0.790376	2.28077	0.589917
s	1.62013	0.002693	-1.88776
s	0.966259	-0.949188	1.90877
h	-1.53702	-2.15233	-1.42282
h	-2.20657	-1.97943	0.423981
h	-1.76628	2.47384	-0.320185
h	1.84873	0.01634	2.23693
h	0.818727	0.523081	-2.83728
h	0.107812	3.01635	-0.096805
h	1.9076	-1.71842	1.32369
8
zn_ph3-2-dep_P1
p	2.44717	-0.13716	-0.2176
zn	0.177005	-0.015949	-0.022354
h	-2.85829	1.28507	-0.022523
h	-2.85756	-0.565078	1.15895
h	-2.90828	-0.663631	-1.03468
p	-2.26787	0.010139	0.019978
h	2.56231	1.25584	0.057235
h	2.56241	-0.506656	1.15332
12
zn_ph3-3-dep_P1
p	1.23227	2.26024	0.353628
zn	0.14252	0.263568	0.034682
h	-2.95214	-1.2661	0.591585
h	-3.00913	0.061846	-1.11725
h	-3.02132	0.879273	0.886303
p	-2.34752	-0.086163	0.116372
h	0.834346	-2.82212	-1.27488
h	2.5785	-1.99105	-0.295646
h	1.02229	-2.9367	0.878962
p	1.17769	-2.01456	-0.173883
h	2.1653	2.01605	-0.691245
h	0.332498	2.98642	-0.47388
16
zn_ph3-4-dep_P1
zn	0.119971	-0.151894	-0.152532
p	1.41923	1.39506	1.39416
p	-1.43653	-1.39963	1.41935
p	1.3338	-1.5607	-1.56707
p	-1.43669	1.42087	-1.39985
h	2.33248	0.710257	2.2187
h	0.90826	2.31891	2.33079
h	-2.32809	-0.805931	2.33611
h	2.31782	2.23423	0.707703
h	2.22338	-0.534308	-1.99137
h	-0.786664	2.27407	-2.31224
h	-0.78511	-2.30353	2.28057
h	-2.32023	2.34505	-0.805611
h	2.20477	-2.01295	-0.536648
h	-2.31885	-2.28881	0.776247
h	-2.32748	0.77731	-2.28027
10
zn_nhch2-2-dep_P1
Zn	0.009886	0.157582	0.398702
N	1.65797	0.517111	-0.276861
C	2.81524	0.413225	0.213521
H	3.66803	0.700306	-0.409671
H	3.06483	0.05944	1.21649
N	-1.93844	-0.016054	0.516776
H	-2.34047	-0.363591	1.38545
C	-2.79587	0.259595	-0.384704
H	-2.4745	0.637255	-1.34951
H	-3.85992	0.12532	-0.213264
15
zn_nhch2-3-dep_P1
Zn	-0.016317	0.002513	-0.063337
N	1.62465	-0.778577	0.20898
C	2.49934	-1.4432	-0.397884
H	3.40174	-1.77682	0.12976
H	2.45082	-1.73842	-1.45361
N	-0.026121	2.03956	0.128853
H	-0.835299	2.63616	-0.024776
C	1.02515	2.67666	0.457325
H	1.94122	2.12631	0.647259
H	1.03765	3.75847	0.556437
N	-1.8712	-0.772003	0.204367
H	-1.9266	-1.49484	0.920104
C	-2.95699	-0.61583	-0.437745
H	-3.01631	0.116352	-1.23618
H	-3.84587	-1.20021	-0.218586
20
zn_nhch2-4-dep_P1
Zn	-0.093294	0.038239	-0.019051
N	0.824244	1.44216	-1.27588
H	0.534821	1.50076	-2.25029
C	1.88108	2.10538	-1.03433
H	2.39831	2.68058	-1.79768
H	2.29718	2.1054	-0.03196
N	0.714707	-1.50666	0.733998
C	1.91363	-1.81791	0.943214
H	2.79022	-1.19152	0.702598
H	2.17669	-2.7825	1.39998
N	-1.66448	-0.785262	-1.14706
H	-2.33243	-0.297085	-1.73867
C	-1.84867	-2.04268	-1.10004
H	-1.18298	-2.63846	-0.480835
H	-2.64613	-2.53332	-1.65257
N	-1.01822	1.13079	1.51459
H	-1.08653	0.584838	2.37206
C	-1.45336	2.31558	1.63299
H	-1.4257	2.98677	0.780088
H	-1.8603	2.70066	2.56466
12
zn_shch3-2-dep_P1
Zn	0.055201	-0.169115	-0.383097
S	2.06945	0.547363	-0.539904
S	-2.19617	-0.783102	-0.280415
H	-2.4575	-0.708152	-1.60361
C	-3.11214	0.715522	0.290083
H	-2.88584	0.822489	1.34711
H	-2.81081	1.59578	-0.265984
H	-4.16817	0.502018	0.15529
C	3.1082	-0.718548	0.325826
H	2.84566	-0.794832	1.37525
H	3.04905	-1.68163	-0.169129
H	4.12038	-0.331495	0.237137
18
zn_shch3-3-dep_P1
Zn	-0.107602	0.064188	-0.311282
S	-2.12232	1.43575	-0.434142
S	1.75887	1.02646	0.256043
S	-0.840716	-2.18124	-0.870143
H	0.378956	-2.75421	-0.899743
H	-2.23099	1.51037	-1.77611
C	-1.4563	-2.92321	0.698731
H	-0.780098	-2.71786	1.52105
H	-2.43071	-2.48009	0.883265
H	-1.56492	-3.99082	0.535642
C	-1.48236	3.12928	-0.104966
H	-2.26437	3.83575	-0.364094
H	-1.28268	3.1703	0.961917
H	-0.573445	3.31384	-0.666618
C	3.06309	-0.279743	0.248492
H	2.84185	-1.0638	0.96612
H	3.20108	-0.692463	-0.746094
H	3.97828	0.222993	0.549996
24
zn_shch3-4-dep_P1
Zn	-0.183693	0.177452	-0.424376
S	-0.984312	-1.233	-2.33586
S	0.367535	-0.831613	1.48136
S	-2.0715	1.76277	-0.00106
S	1.54244	1.53798	-1.65076
H	-1.87021	-0.424954	-2.94949
H	2.23564	0.496177	-2.14947
H	-1.48891	2.957	-0.219738
C	-2.16766	-2.39741	-1.5517
H	-2.63522	-2.98772	-2.33316
H	-1.57636	-3.03703	-0.903396
H	-2.90805	-1.8629	-0.966923
C	-2.1721	1.82912	1.8325
H	-2.85201	2.62882	2.10784
H	-2.57852	0.871122	2.14332
H	-1.18962	1.97	2.26889
C	2.69856	2.00885	-0.302318
H	2.29869	2.92112	0.131304
H	2.74815	1.22876	0.450036
H	3.67028	2.2128	-0.740434
C	1.61114	-2.11551	1.02093
H	1.19724	-2.84769	0.332861
H	2.50712	-1.67331	0.593035
H	1.88104	-2.62087	1.94448
16
zn_nh3-3_h2o-1_P2
Zn	0.169724	-0.072704	0.141372
N	1.29086	1.21602	1.30169
N	-1.26473	-1.14506	1.16995
N	1.29867	-1.22701	-1.14971
H	2.02398	0.75174	1.83798
H	0.74122	1.73335	1.98754
H	-1.78076	-0.591386	1.85352
H	1.76585	1.92609	0.744206
H	1.95252	-0.686221	-1.71588
H	-0.887032	-1.93528	1.69298
H	1.87124	-1.91805	-0.664141
H	-1.97265	-1.53909	0.550104
H	0.737694	-1.76103	-1.81356
O	-0.931197	1.17946	-1.11221
H	-0.878716	1.23335	-2.07703
H	-1.59027	1.8339	-0.839947
15
zn_nh3-3_oh-1_P1
Zn	0.073233	4.6e-05	-0.093671
N	-0.560366	0.979766	1.67795
N	-0.540555	-2.02734	-0.070415
N	-0.758662	0.95027	-1.7951
H	-0.994208	0.43231	2.41452
H	-1.09764	1.83753	1.60025
H	-1.50092	-2.22628	0.195193
H	0.372505	1.23644	2.00222
H	-0.243215	1.81952	-1.91369
H	0.056875	-2.49938	0.604529
H	-1.74477	1.19326	-1.76432
H	-0.382634	-2.49643	-0.958246
H	-0.617201	0.422798	-2.65237
H	2.57413	0.070756	-0.289529
O	1.84574	0.34586	0.268593
14
zn_nh3-1_h2o-2_sh2-1_P2
Zn	-0.069023	0.019007	0.08468
S	0.587214	1.64488	-1.58273
H	-0.510712	2.43345	-1.62404
H	1.2957	2.49799	-0.808591
H	-1.78701	1.14006	1.71702
H	0.008817	-1.84321	-1.91023
H	1.84791	-0.005229	2.05808
H	-1.73005	-0.451781	2.04638
H	-0.513358	-2.5864	-0.64695
H	2.20929	-1.1129	1.02365
O	1.54999	-0.438648	1.24503
O	-0.189715	-1.73205	-0.968647
N	-1.71181	0.221345	1.27926
H	-2.58656	0.086658	0.77065
13
zn_nh3-1_h2o-1_oh-1_sh2-1_P1
Zn	0.359512	0.245594	-0.187817
S	-2.10105	0.565329	0.222537
H	-2.38109	1.42893	-0.77437
H	-2.37825	-0.517609	-0.533931
H	1.36919	2.67387	-0.38733
H	0.625055	-1.44878	2.19725
H	0.968455	-1.02053	-2.23169
H	2.39462	1.6968	0.419536
H	1.09817	-1.89694	0.7668
O	0.620045	-1.14071	-1.34648
O	0.927864	-1.131	1.33946
N	1.41183	1.94212	0.317768
H	1.12649	2.36472	1.19753
13
zn_nh3-1_h2o-2_sh-1_P1
Zn	0.081803	0.260664	-0.117479
S	-2.11017	0.469793	-0.128763
H	-2.34206	-0.685566	-0.781214
H	1.21187	2.58759	-0.382772
H	-0.148962	-1.49382	1.86402
H	0.776855	-0.819009	-2.52645
H	2.42368	1.50099	-0.260255
H	1.40014	-1.37028	1.94319
H	1.28678	-1.80265	-1.4448
O	1.09798	-0.871119	-1.61663
O	0.635783	-1.20674	1.37704
N	1.51014	1.74914	0.111025
H	1.64689	2.0254	1.08023
15
zn_nh3-2_h2o-2_P2
Zn	-0.00418	-0.000287	0.110773
N	-0.060721	1.77952	1.11314
N	0.054148	-1.78001	1.11314
H	2.36834	0.568633	-1.15713
H	1.62933	-0.491707	-2.02053
H	-2.37876	-0.569517	-1.15336
H	0.626901	1.85849	1.86292
H	0.960727	-1.94676	1.55153
H	-1.64203	0.492299	-2.01692
H	-0.106546	-2.585	0.506969
H	0.098252	2.58443	0.506419
H	-0.6318	-1.85851	1.8645
H	-0.966371	1.94599	1.55356
O	1.54656	0.061803	-1.23016
O	-1.55784	-0.061364	-1.22681
14
zn_nh3-2_h2o-1_oh-1_P1
Zn	0.173256	-0.113937	0.075679
N	0.006889	1.66164	1.16266
N	0.05761	-1.83661	1.2222
H	1.81899	-0.240561	-1.80576
H	-2.47509	-0.263655	-1.28741
H	0.341339	1.69275	2.12109
H	0.884262	-1.98138	1.79702
H	-1.111	0.173591	-1.94051
H	-0.003834	-2.64344	0.60527
H	0.561671	2.33249	0.634509
H	-0.743121	-1.88613	1.84675
H	-0.946187	2.01544	1.16729
O	1.00333	0.182859	-1.53501
O	-1.61548	0.131513	-1.10798
13
zn_h2o-2_sh2-2_P2
Zn	-0.028479	-0.03555	0.216832
S	0.644038	1.71327	-1.31278
S	-1.92484	-0.040439	1.71819
H	-0.497985	2.43308	-1.39316
H	1.23975	2.56861	-0.450782
H	-2.67801	0.944596	1.1785
H	-0.85849	-2.44643	-0.76553
H	2.11146	-0.193767	1.93872
H	-1.44327	0.737652	2.71428
H	0.062214	-1.81703	-1.85295
H	2.04226	-1.51602	1.11462
O	1.61426	-0.657207	1.24902
O	-0.282916	-1.69076	-0.956442
14
zn_nh3-1_h2o-1_sh2-2_P2
Zn	-0.081275	-0.020793	0.054893
S	0.169999	1.85528	-1.49877
S	0.238848	-2.10071	-1.20054
H	0.207265	2.89558	-0.635862
H	1.51128	1.82946	-1.6679
H	-1.82465	1.01349	1.74821
H	-0.602419	-1.89264	-2.23851
H	1.66692	0.412073	2.15207
H	-1.77381	-0.595697	1.97559
H	-0.607853	-2.93181	-0.552628
H	2.33184	-0.633541	1.21518
O	1.52883	-0.108649	1.34757
N	-1.74663	0.124697	1.2534
H	-2.61766	0.026429	0.730862
13
zn_nh3-1_oh-1_sh2-2_P1
Zn	-0.028309	0.335101	-0.063808
S	-2.15712	-1.00813	0.154749
S	1.76645	-1.40446	0.298886
H	-2.77711	-0.376628	-0.86333
H	-1.81496	-2.06798	-0.604778
H	-0.041148	2.64665	0.880185
H	2.228	-1.13728	1.53674
H	0.73347	1.82678	2.06225
H	2.72871	-0.686225	-0.314821
H	0.225693	1.07981	-2.41356
O	0.20148	1.41454	-1.5154
N	-0.067735	1.79428	1.43889
H	-0.895339	1.84449	2.0257
13
zn_nh3-1_h2o-1_sh2-1_sh-1_P1
Zn	0.067631	0.301557	0.012919
S	-2.32301	-0.545469	-0.183472
S	1.62296	-1.23242	-0.329453
H	-2.08971	-1.30523	-1.27262
H	-2.17673	-1.58352	0.664995
H	-0.918245	2.32333	1.48379
H	-0.43205	2.12768	-2.28555
H	0.674023	2.54296	1.20495
H	2.59942	-0.602495	0.351365
H	0.814491	1.19146	-2.37773
O	0.123777	1.51812	-1.78506
N	-0.027505	1.83761	1.41862
H	0.187266	1.49226	2.3512
16
zn_nh3-3_sh2-1_P2
Zn	-0.018577	0.022575	0.018577
N	1.20631	1.21697	1.20852
N	-1.18557	-1.24313	1.18557
N	-1.20852	1.21697	-1.20631
H	1.78394	0.686245	1.86007
H	0.690484	1.88175	1.78496
H	-1.81624	-0.748126	1.81624
H	1.86002	1.77977	0.664205
H	-0.664205	1.77977	-1.86002
H	-0.634594	-1.86044	1.78147
H	-1.78496	1.88175	-0.690484
H	2.08027	-2.10221	-0.684112
H	-1.78147	-1.86044	0.634594
H	-1.86007	0.686245	-1.78394
H	0.684112	-2.10221	-2.08027
S	1.51559	-1.19955	-1.51559
15
zn_nh3-3_sh-1_P1
Zn	0.128823	0.017646	0.008925
N	0.973186	-0.955966	1.72106
N	0.976624	1.98572	0.016129
N	1.00244	-0.962958	-1.68128
H	0.808037	-0.417297	2.56741
H	1.95908	-1.20256	1.72268
H	1.96444	2.1075	-0.189258
H	0.45046	-1.82059	1.84088
H	0.660126	-1.92016	-1.71532
H	0.805059	2.45445	0.901922
H	2.0135	-1.01125	-1.768
H	-2.38792	0.569489	0.953306
H	0.460534	2.51911	-0.679793
H	0.657239	-0.519013	-2.52883
S	-2.09555	-0.090834	-0.182592
15
[truncated: 207 more rows]

[truncated: 4 more sheets: zn_xyz_large, mgzn_binuclear_xyz, zn_sbde, zn_pa]
